# Supplementary material
Source: publisher figshare collection journal article supplement (https://acs.figshare.com/ndownloader/files/6523230)
Supplement: Supplementary file 1 [file 6523230]

 
data_nd1609

_vrf_DIFMX01_nd1609
;
RESPONSE: There is a small amount of disorder in the 
ethyl acetate of crystallization. Attempts to model a 
suitable alternative position for the EtOAc did not yield
a satisfactory model. Thus, there is a slightly large 
Fourier peak near the solvent molecule. This residual 
density also has follow-on alerts below.
;

_publ_section_title           ND1609
_publ_contact_author_name     'Michael Grigalunas'
_publ_contact_author_address  '387 Stepan'
_publ_contact_author_email    mgrigalu@nd.edu
_publ_contact_author_phone    1-2879


_audit_creation_method            'SHELXL-2014/7'
_shelx_SHELXL_version_number      '2014/7'
_chemical_name_systematic         ?
_chemical_name_common             ?
_chemical_melting_point           ?
_chemical_formula_moiety          
 '2(C36 H22 F10 O5), C4 H8 O2' 

_chemical_formula_sum
 'C76 H52 F20 O12' 
_chemical_formula_weight          1537.17

loop_
 _atom_type_symbol
 _atom_type_description
 _atom_type_scat_dispersion_real
 _atom_type_scat_dispersion_imag
 _atom_type_scat_source
 'C'  'C'   0.0033   0.0016
 'International Tables Vol C Tables 4.2.6.8 and 6.1.1.4'
 'H'  'H'   0.0000   0.0000
 'International Tables Vol C Tables 4.2.6.8 and 6.1.1.4'
 'F'  'F'   0.0171   0.0103
 'International Tables Vol C Tables 4.2.6.8 and 6.1.1.4'
 'O'  'O'   0.0106   0.0060
 'International Tables Vol C Tables 4.2.6.8 and 6.1.1.4'
 
_space_group_crystal_system       monoclinic
_space_group_IT_number            14
_space_group_name_H-M_alt         'P 21/n'
_space_group_name_Hall            '-P 2yn'
 
_shelx_space_group_comment
;
The symmetry employed for this shelxl refinement is uniquely defined
by the following loop, which should always be used as a source of
symmetry information in preference to the above space-group names.
They are only intended as comments.
;
 
loop_
 _space_group_symop_operation_xyz
 'x, y, z'
 '-x+1/2, y+1/2, -z+1/2'
 '-x, -y, -z'
 'x-1/2, -y-1/2, z-1/2'
 
_cell_length_a                    8.1826(9)
_cell_length_b                    25.666(3)
_cell_length_c                    31.715(4)
_cell_angle_alpha                 90
_cell_angle_beta                  95.407(2)
_cell_angle_gamma                 90
_cell_volume                      6631.0(13)
_cell_formula_units_Z             4
_cell_measurement_temperature     120(2)
_cell_measurement_reflns_used     9914
_cell_measurement_theta_min       2.46
_cell_measurement_theta_max       26.28
 
_exptl_crystal_description        rod
_exptl_crystal_colour             colorless
_exptl_crystal_density_meas       ?
_exptl_crystal_density_method     ?
_exptl_crystal_density_diffrn     1.540          
_exptl_crystal_F_000              3136
_exptl_transmission_factor_min    ?
_exptl_transmission_factor_max    ?
_exptl_crystal_size_max           0.237
_exptl_crystal_size_mid           0.112
_exptl_crystal_size_min           0.078
_exptl_absorpt_coefficient_mu     0.140
_shelx_estimated_absorpt_T_min    0.967
_shelx_estimated_absorpt_T_max    0.989
_exptl_absorpt_correction_type    numerical
_exptl_absorpt_correction_T_min   0.9362
_exptl_absorpt_correction_T_max   1.0000
_exptl_absorpt_process_details    'SADABS (Krause et al., 2015)'
_exptl_absorpt_special_details    ?
_diffrn_ambient_temperature       120(2)
_diffrn_radiation_wavelength      0.71073
_diffrn_radiation_type            MoK\a
_diffrn_source                    'fine-focus sealed tube' 
_diffrn_source_monochromator      'Bruker TRIUMPH curved-graphite' 
_diffrn_measurement_device_type   'Bruker APEX-II' 
_diffrn_measurement_method        
'combination of \w and \f-scans ' 
_diffrn_detector_area_resol_mean   8.33 
_diffrn_reflns_number             113081
_diffrn_reflns_av_unetI/netI      0.0269
_diffrn_reflns_av_R_equivalents   0.0461
_diffrn_reflns_limit_h_min        -10
_diffrn_reflns_limit_h_max        10
_diffrn_reflns_limit_k_min        -32
_diffrn_reflns_limit_k_max        32
_diffrn_reflns_limit_l_min        -39
_diffrn_reflns_limit_l_max        39
_diffrn_reflns_theta_min          1.022
_diffrn_reflns_theta_max          26.378
_diffrn_reflns_theta_full         25.242
_diffrn_measured_fraction_theta_max   1.000
_diffrn_measured_fraction_theta_full  1.000
_diffrn_reflns_Laue_measured_fraction_max    1.000
_diffrn_reflns_Laue_measured_fraction_full   1.000
_diffrn_reflns_point_group_measured_fraction_max   1.000
_diffrn_reflns_point_group_measured_fraction_full  1.000
_reflns_number_total              13556
_reflns_number_gt                 10197
_reflns_threshold_expression      'I > 2\s(I)'
_reflns_Friedel_coverage          0.000
_reflns_Friedel_fraction_max      .
_reflns_Friedel_fraction_full     .
 
_reflns_special_details
;
 Reflections were merged by SHELXL according to the crystal
 class for the calculation of statistics and refinement.
 
 _reflns_Friedel_fraction is defined as the number of unique
 Friedel pairs measured divided by the number that would be
 possible theoretically, ignoring centric projections and
 systematic absences.

Reflection [0 0 2] was omitted from the data. Its intensity was near zero
presumably due to being partially eclipsed by the beamstop.
;
 
_computing_data_collection        'Bruker APEX-3 (Bruker, 2015)' 
_computing_cell_refinement        'Bruker SAINT (Bruker, 2015)' 
_computing_data_reduction         'Bruker SAINT (Bruker, 2015)' 
_computing_structure_solution     'SHELXT-2014/2 (Sheldrick, 2015)' 
_computing_structure_refinement   'SHELXL-2014/7 (Sheldrick, 2015)'
_computing_molecular_graphics     'Bruker XP (Bruker, 2015)'
_computing_publication_material   'CIFTAB (Sheldrick, 2008)'
_refine_special_details           
;
Methoxy carbon C19A/B was found to be disordered over two sites. The
carbon was refined with occupancies of the two components summed to
unity yielding an approximately 0.7:0.3 ratio. The atomic displacement
parameters of the minor component (C19B) were restrained to be similar 
to those of the major component (C19A).
;
_refine_ls_structure_factor_coef  Fsqd
_refine_ls_matrix_type            full
_refine_ls_weighting_scheme       calc
_refine_ls_weighting_details
'w=1/[\s^2^(Fo^2^)+(0.0652P)^2^+9.5679P] where P=(Fo^2^+2Fc^2^)/3'
_atom_sites_solution_primary      vecmap
_atom_sites_solution_secondary    difmap
_atom_sites_solution_hydrogens    geom
_refine_ls_hydrogen_treatment     constr
_refine_ls_extinction_method      none
_refine_ls_extinction_coef        .
_refine_ls_number_reflns          13556
_refine_ls_number_parameters      998
_refine_ls_number_restraints      6
_refine_ls_R_factor_all           0.0770
_refine_ls_R_factor_gt            0.0545
_refine_ls_wR_factor_ref          0.1502
_refine_ls_wR_factor_gt           0.1366
_refine_ls_goodness_of_fit_ref    1.027
_refine_ls_restrained_S_all       1.027
_refine_ls_shift/su_max           0.014
_refine_ls_shift/su_mean          0.000
 
loop_
 _atom_site_label
 _atom_site_type_symbol
 _atom_site_fract_x
 _atom_site_fract_y
 _atom_site_fract_z
 _atom_site_U_iso_or_equiv
 _atom_site_adp_type
 _atom_site_occupancy
 _atom_site_site_symmetry_order  
 _atom_site_calc_flag
 _atom_site_refinement_flags_posn
 _atom_site_refinement_flags_adp
 _atom_site_refinement_flags_occupancy
 _atom_site_disorder_assembly
 _atom_site_disorder_group
F1 F 1.34627(18) 0.90461(6) 0.63300(5) 0.0297(3) Uani 1 1 d . . . . .
F2 F 1.4393(2) 1.00355(7) 0.62236(6) 0.0442(5) Uani 1 1 d . . . . .
F3 F 1.2105(3) 1.08091(6) 0.61353(6) 0.0514(5) Uani 1 1 d . . . . .
F4 F 0.8879(2) 1.05766(6) 0.61663(6) 0.0436(5) Uani 1 1 d . . . . .
F5 F 0.79390(19) 0.95920(6) 0.62893(5) 0.0301(3) Uani 1 1 d . . . . .
F6 F 1.13398(19) 0.89342(6) 0.53902(5) 0.0307(4) Uani 1 1 d . . . . .
F7 F 1.0062(2) 0.95201(7) 0.47373(5) 0.0459(5) Uani 1 1 d . . . . .
F8 F 0.6770(3) 0.97044(9) 0.46311(6) 0.0609(6) Uani 1 1 d . . . . .
F9 F 0.4763(2) 0.92793(9) 0.51747(6) 0.0562(6) Uani 1 1 d . . . . .
F10 F 0.60412(19) 0.87008(7) 0.58301(5) 0.0350(4) Uani 1 1 d . . . . .
O1 O 1.3502(2) 0.83403(8) 0.81805(6) 0.0317(4) Uani 1 1 d . . . . .
O2 O 1.2911(3) 0.93936(8) 0.82694(6) 0.0373(5) Uani 1 1 d . . . . .
O3 O 1.1010(2) 0.99057(7) 0.76897(6) 0.0271(4) Uani 1 1 d . . . . .
O14 O 1.2997(2) 0.61848(7) 0.71631(6) 0.0321(4) Uani 1 1 d . . . . .
O15 O 1.4290(3) 0.65819(8) 0.78717(7) 0.0437(5) Uani 1 1 d . . . . .
C1 C 1.2711(3) 0.86075(11) 0.78422(8) 0.0253(6) Uani 1 1 d . . . . .
C2 C 1.2346(3) 0.91252(11) 0.79071(8) 0.0258(6) Uani 1 1 d . . . . .
C3 C 1.1399(3) 0.94056(10) 0.75939(8) 0.0227(5) Uani 1 1 d . . . . .
C4 C 1.0902(3) 0.91630(9) 0.72182(7) 0.0201(5) Uani 1 1 d . . . . .
H4 H 1.0234 0.9350 0.7009 0.024 Uiso 1 1 calc R U . . .
C5 C 1.1346(3) 0.86485(9) 0.71326(7) 0.0195(5) Uani 1 1 d . . . . .
C6 C 1.0784(3) 0.84206(9) 0.67208(7) 0.0180(5) Uani 1 1 d . . . . .
C7 C 1.0213(3) 0.87206(9) 0.63591(7) 0.0177(5) Uani 1 1 d . . . . .
C8 C 0.9404(3) 0.84838(9) 0.60036(7) 0.0181(5) Uani 1 1 d . . . . .
C9 C 0.9205(3) 0.79393(9) 0.59861(7) 0.0197(5) Uani 1 1 d . . . . .
C10 C 0.9936(3) 0.76503(9) 0.63159(8) 0.0207(5) Uani 1 1 d . . . . .
H10 H 0.9875 0.7281 0.6298 0.025 Uiso 1 1 calc R U . . .
C11 C 1.0772(3) 0.78735(9) 0.66791(7) 0.0180(5) Uani 1 1 d . . . . .
C12 C 1.1670(3) 0.75567(9) 0.70049(7) 0.0192(5) Uani 1 1 d . . . . .
C13 C 1.1862(3) 0.70190(10) 0.69317(8) 0.0230(5) Uani 1 1 d . . . . .
H13 H 1.1363 0.6871 0.6677 0.028 Uiso 1 1 calc R U . . .
C14 C 1.2745(3) 0.67042(10) 0.72175(8) 0.0257(6) Uani 1 1 d . . . . .
C15 C 1.3468(3) 0.69240(11) 0.75959(9) 0.0299(6) Uani 1 1 d . . . . .
C16 C 1.3326(3) 0.74477(11) 0.76702(9) 0.0287(6) Uani 1 1 d . . . . .
H16 H 1.3843 0.7590 0.7925 0.034 Uiso 1 1 calc R U . . .
C17 C 1.2429(3) 0.77838(10) 0.73773(8) 0.0221(5) Uani 1 1 d . . . . .
C18 C 1.2203(3) 0.83415(10) 0.74537(8) 0.0211(5) Uani 1 1 d . . . . .
C19 C 1.5190(4) 0.84754(14) 0.82862(10) 0.0391(7) Uani 1 1 d . . . . .
H19D H 1.5733 0.8518 0.8026 0.059 Uiso 1 1 calc R U . . .
H19E H 1.5735 0.8198 0.8459 0.059 Uiso 1 1 calc R U . . .
H19F H 1.5256 0.8803 0.8446 0.059 Uiso 1 1 calc R U . . .
C20 C 1.2281(4) 0.92344(12) 0.86514(9) 0.0363(7) Uani 1 1 d . . . . .
H20D H 1.1112 0.9152 0.8595 0.054 Uiso 1 1 calc R U . . .
H20E H 1.2424 0.9516 0.8860 0.054 Uiso 1 1 calc R U . . .
H20F H 1.2875 0.8924 0.8763 0.054 Uiso 1 1 calc R U . . .
C21 C 1.0132(3) 1.02006(10) 0.73583(8) 0.0272(6) Uani 1 1 d . . . . .
H21D H 1.0726 1.0188 0.7104 0.041 Uiso 1 1 calc R U . . .
H21E H 1.0037 1.0563 0.7450 0.041 Uiso 1 1 calc R U . . .
H21F H 0.9033 1.0052 0.7294 0.041 Uiso 1 1 calc R U . . .
C22 C 1.0666(3) 0.92831(9) 0.63128(7) 0.0199(5) Uani 1 1 d . . . . .
C23 C 1.2303(3) 0.94175(10) 0.62939(8) 0.0235(5) Uani 1 1 d . . . . .
C24 C 1.2799(4) 0.99264(11) 0.62378(8) 0.0312(6) Uani 1 1 d . . . . .
C25 C 1.1645(4) 1.03135(10) 0.61951(8) 0.0327(7) Uani 1 1 d . . . . .
C26 C 1.0014(4) 1.01972(10) 0.62061(8) 0.0298(6) Uani 1 1 d . . . . .
C27 C 0.9541(3) 0.96879(10) 0.62641(8) 0.0232(5) Uani 1 1 d . . . . .
C28 C 0.8730(3) 0.88014(9) 0.56335(7) 0.0190(5) Uani 1 1 d . . . . .
C29 C 0.9709(3) 0.90160(10) 0.53437(8) 0.0233(5) Uani 1 1 d . . . . .
C30 C 0.9068(4) 0.93155(11) 0.50083(8) 0.0317(6) Uani 1 1 d . . . . .
C31 C 0.7401(4) 0.94081(12) 0.49527(9) 0.0368(7) Uani 1 1 d . . . . .
C32 C 0.6382(4) 0.91967(12) 0.52303(9) 0.0353(7) Uani 1 1 d . . . . .
C33 C 0.7058(3) 0.88976(10) 0.55627(8) 0.0252(5) Uani 1 1 d . . . . .
C34 C 0.8337(3) 0.76780(10) 0.56037(8) 0.0267(6) Uani 1 1 d . . . . .
H34D H 0.7186 0.7788 0.5571 0.040 Uiso 1 1 calc R U . . .
H34E H 0.8394 0.7299 0.5640 0.040 Uiso 1 1 calc R U . . .
H34F H 0.8867 0.7776 0.5351 0.040 Uiso 1 1 calc R U . . .
C35 C 1.2284(4) 0.59575(11) 0.67779(9) 0.0352(7) Uani 1 1 d . . . . .
H35D H 1.2712 0.6132 0.6537 0.053 Uiso 1 1 calc R U . . .
H35E H 1.1088 0.5998 0.6759 0.053 Uiso 1 1 calc R U . . .
H35F H 1.2561 0.5586 0.6773 0.053 Uiso 1 1 calc R U . . .
C36 C 1.4811(7) 0.67844(16) 0.82827(13) 0.0817(16) Uani 1 1 d . . . . .
H36D H 1.5620 0.7061 0.8257 0.123 Uiso 1 1 calc R U . . .
H36E H 1.5308 0.6504 0.8462 0.123 Uiso 1 1 calc R U . . .
H36F H 1.3862 0.6926 0.8411 0.123 Uiso 1 1 calc R U . . .
F1A F 0.89919(17) 0.63669(5) 0.59679(5) 0.0259(3) Uani 1 1 d . . . . .
F2A F 1.0167(2) 0.55191(6) 0.56002(6) 0.0425(4) Uani 1 1 d . . . . .
F3A F 0.8098(2) 0.47450(6) 0.53136(6) 0.0463(5) Uani 1 1 d . . . . .
F4A F 0.4841(2) 0.48102(6) 0.54211(5) 0.0354(4) Uani 1 1 d . . . . .
F5A F 0.36496(17) 0.56615(6) 0.57771(5) 0.0266(3) Uani 1 1 d . . . . .
F6A F 0.68661(18) 0.67193(6) 0.51115(4) 0.0262(3) Uani 1 1 d . . . . .
F7A F 0.5900(2) 0.63909(7) 0.43312(5) 0.0418(4) Uani 1 1 d . . . . .
F8A F 0.2689(3) 0.61750(8) 0.41024(5) 0.0502(5) Uani 1 1 d . . . . .
F9A F 0.0430(2) 0.63028(7) 0.46743(6) 0.0455(5) Uani 1 1 d . . . . .
F10A F 0.13984(18) 0.66184(6) 0.54650(5) 0.0319(4) Uani 1 1 d . . . . .
O1A O 0.9281(3) 0.64703(8) 0.78563(7) 0.0511(7) Uani 1 1 d . . . . .
O2A O 0.9219(2) 0.54298(7) 0.77437(5) 0.0229(4) Uani 1 1 d . . . . .
O3A O 0.7736(2) 0.49979(6) 0.70541(5) 0.0244(4) Uani 1 1 d . . . . .
O13A O 0.7191(2) 0.87965(7) 0.74419(6) 0.0263(4) Uani 1 1 d . . . . .
O14A O 0.8936(2) 0.82470(7) 0.79992(6) 0.0258(4) Uani 1 1 d . . . . .
C1A C 0.8490(3) 0.62820(10) 0.74898(8) 0.0218(5) Uani 1 1 d . . . . .
C2A C 0.8514(3) 0.57514(9) 0.74307(7) 0.0188(5) Uani 1 1 d . . . . .
C3A C 0.7708(3) 0.55305(9) 0.70645(8) 0.0197(5) Uani 1 1 d . . . . .
C4A C 0.6929(3) 0.58490(9) 0.67622(7) 0.0194(5) Uani 1 1 d . . . . .
H4A H 0.6349 0.5697 0.6519 0.023 Uiso 1 1 calc R U . . .
C5A C 0.6966(3) 0.63957(9) 0.68019(7) 0.0168(5) Uani 1 1 d . . . . .
C6A C 0.6141(3) 0.67268(9) 0.64672(7) 0.0158(5) Uani 1 1 d . . . . .
C7A C 0.5638(3) 0.65495(9) 0.60477(7) 0.0166(5) Uani 1 1 d . . . . .
C8A C 0.4677(3) 0.68597(9) 0.57613(7) 0.0166(5) Uani 1 1 d . . . . .
C9A C 0.4199(3) 0.73629(9) 0.58781(7) 0.0186(5) Uani 1 1 d . . . . .
C10A C 0.4804(3) 0.75478(9) 0.62684(7) 0.0184(5) Uani 1 1 d . . . . .
H10A H 0.4522 0.7892 0.6344 0.022 Uiso 1 1 calc R U . . .
C11A C 0.5819(3) 0.72534(9) 0.65618(7) 0.0164(5) Uani 1 1 d . . . . .
C12A C 0.6596(3) 0.74906(9) 0.69472(7) 0.0171(5) Uani 1 1 d . . . . .
C13A C 0.6449(3) 0.80322(9) 0.70135(7) 0.0192(5) Uani 1 1 d . . . . .
H13A H 0.5776 0.8233 0.6814 0.023 Uiso 1 1 calc R U . . .
C14A C 0.7251(3) 0.82763(9) 0.73583(8) 0.0203(5) Uani 1 1 d . . . . .
C15A C 0.8221(3) 0.79785(10) 0.76576(8) 0.0210(5) Uani 1 1 d . . . . .
C16A C 0.8399(3) 0.74538(9) 0.75956(7) 0.0201(5) Uani 1 1 d . . . . .
H16A H 0.9089 0.7259 0.7796 0.024 Uiso 1 1 calc R U . . .
C17A C 0.7583(3) 0.71920(9) 0.72422(7) 0.0180(5) Uani 1 1 d . . . . .
C18A C 0.7711(3) 0.66280(9) 0.71793(7) 0.0175(5) Uani 1 1 d . . . . .
C19A C 0.8835(8) 0.6316(2) 0.82376(14) 0.0545(18) Uani 0.711(8) 1 d . U P A 1
H19A H 0.7786 0.6130 0.8198 0.082 Uiso 0.711(8) 1 calc R U P A 1
H19B H 0.8719 0.6622 0.8417 0.082 Uiso 0.711(8) 1 calc R U P A 1
H19C H 0.9679 0.6084 0.8374 0.082 Uiso 0.711(8) 1 calc R U P A 1
C19B C 1.0415(15) 0.6367(4) 0.8112(4) 0.042(4) Uani 0.289(8) 1 d . U P A 2
H19G H 1.0210 0.6032 0.8246 0.063 Uiso 0.289(8) 1 calc R U P A 2
H19H H 1.0535 0.6640 0.8328 0.063 Uiso 0.289(8) 1 calc R U P A 2
H19I H 1.1425 0.6343 0.7969 0.063 Uiso 0.289(8) 1 calc R U P A 2
C20A C 1.0842(4) 0.52750(13) 0.76663(11) 0.0420(8) Uani 1 1 d . . . . .
H20A H 1.0814 0.5106 0.7388 0.063 Uiso 1 1 calc R U . . .
H20B H 1.1273 0.5030 0.7886 0.063 Uiso 1 1 calc R U . . .
H20C H 1.1553 0.5583 0.7671 0.063 Uiso 1 1 calc R U . . .
C21A C 0.6908(4) 0.47458(10) 0.66966(8) 0.0302(6) Uani 1 1 d . . . . .
H21A H 0.7484 0.4817 0.6446 0.045 Uiso 1 1 calc R U . . .
H21B H 0.5780 0.4877 0.6651 0.045 Uiso 1 1 calc R U . . .
H21C H 0.6889 0.4369 0.6747 0.045 Uiso 1 1 calc R U . . .
C22A C 0.6272(3) 0.60525(9) 0.58726(7) 0.0176(5) Uani 1 1 d . . . . .
C23A C 0.7938(3) 0.59935(9) 0.58272(8) 0.0201(5) Uani 1 1 d . . . . .
C24A C 0.8564(3) 0.55597(10) 0.56421(9) 0.0274(6) Uani 1 1 d . . . . .
C25A C 0.7512(4) 0.51644(10) 0.54981(9) 0.0286(6) Uani 1 1 d . . . . .
C26A C 0.5860(3) 0.52023(9) 0.55466(8) 0.0247(5) Uani 1 1 d . . . . .
C27A C 0.5262(3) 0.56420(9) 0.57294(7) 0.0201(5) Uani 1 1 d . . . . .
C28A C 0.4166(3) 0.66764(9) 0.53213(7) 0.0188(5) Uani 1 1 d . . . . .
C29A C 0.5265(3) 0.66146(9) 0.50159(8) 0.0211(5) Uani 1 1 d . . . . .
C30A C 0.4783(4) 0.64485(10) 0.46115(8) 0.0281(6) Uani 1 1 d . . . . .
C31A C 0.3159(4) 0.63420(10) 0.44949(8) 0.0327(7) Uani 1 1 d . . . . .
C32A C 0.2022(3) 0.64033(10) 0.47842(9) 0.0304(6) Uani 1 1 d . . . . .
C33A C 0.2535(3) 0.65677(10) 0.51909(8) 0.0235(5) Uani 1 1 d . . . . .
C34A C 0.3182(3) 0.77126(10) 0.55745(8) 0.0242(5) Uani 1 1 d . . . . .
H34A H 0.3693 0.7737 0.5308 0.036 Uiso 1 1 calc R U . . .
H34B H 0.3117 0.8061 0.5699 0.036 Uiso 1 1 calc R U . . .
H34C H 0.2074 0.7568 0.5520 0.036 Uiso 1 1 calc R U . . .
C35A C 0.6186(4) 0.91074(10) 0.71493(9) 0.0296(6) Uani 1 1 d . . . . .
H35A H 0.6551 0.9068 0.6865 0.044 Uiso 1 1 calc R U . . .
H35B H 0.6275 0.9474 0.7235 0.044 Uiso 1 1 calc R U . . .
H35C H 0.5041 0.8994 0.7146 0.044 Uiso 1 1 calc R U . . .
C36A C 0.9744(4) 0.79451(11) 0.83343(8) 0.0304(6) Uani 1 1 d . . . . .
H36A H 1.0669 0.7758 0.8230 0.046 Uiso 1 1 calc R U . . .
H36B H 0.8968 0.7694 0.8436 0.046 Uiso 1 1 calc R U . . .
H36C H 1.0149 0.8176 0.8567 0.046 Uiso 1 1 calc R U . . .
O1S O 0.2051(9) 0.7508(2) 0.42455(16) 0.199(3) Uani 1 1 d . . . B 1
O2S O -0.0145(6) 0.79819(17) 0.44160(12) 0.1085(13) Uani 1 1 d . . . B 1
C37 C 0.2584(8) 0.8374(2) 0.44375(17) 0.0992(18) Uani 1 1 d . . . B 1
H37A H 0.3703 0.8290 0.4373 0.149 Uiso 1 1 calc R U . B 1
H37B H 0.2596 0.8474 0.4736 0.149 Uiso 1 1 calc R U . B 1
H37C H 0.2157 0.8663 0.4258 0.149 Uiso 1 1 calc R U . B 1
C38 C 0.1451(10) 0.7881(3) 0.43493(17) 0.121(3) Uani 1 1 d . . . B 1
C39 C -0.1410(11) 0.7548(3) 0.4312(2) 0.138(3) Uani 1 1 d . . . B 1
H39A H -0.1294 0.7405 0.4026 0.166 Uiso 1 1 calc R U . B 1
H39B H -0.1239 0.7262 0.4521 0.166 Uiso 1 1 calc R U . B 1
C40 C -0.3105(8) 0.7782(2) 0.43279(16) 0.0976(19) Uani 1 1 d . . . B 1
H40A H -0.3111 0.8006 0.4578 0.146 Uiso 1 1 calc R U . B 1
H40B H -0.3910 0.7502 0.4344 0.146 Uiso 1 1 calc R U . B 1
H40C H -0.3389 0.7989 0.4072 0.146 Uiso 1 1 calc R U . B 1
 
loop_
 _atom_site_aniso_label
 _atom_site_aniso_U_11
 _atom_site_aniso_U_22
 _atom_site_aniso_U_33
 _atom_site_aniso_U_23
 _atom_site_aniso_U_13
 _atom_site_aniso_U_12
F1 0.0247(8) 0.0332(8) 0.0309(8) 0.0062(7) 0.0005(6) -0.0008(7)
F2 0.0425(10) 0.0488(11) 0.0402(10) 0.0086(8) -0.0024(8) -0.0272(9)
F3 0.0865(15) 0.0198(8) 0.0476(11) 0.0047(8) 0.0045(10) -0.0212(9)
F4 0.0711(13) 0.0180(8) 0.0423(10) 0.0035(7) 0.0094(9) 0.0133(8)
F5 0.0320(8) 0.0258(8) 0.0334(9) 0.0009(6) 0.0084(7) 0.0060(7)
F6 0.0286(8) 0.0377(9) 0.0265(8) 0.0050(7) 0.0058(6) -0.0021(7)
F7 0.0674(13) 0.0449(11) 0.0279(9) 0.0172(8) 0.0180(8) 0.0022(9)
F8 0.0808(15) 0.0662(14) 0.0351(10) 0.0265(10) 0.0030(10) 0.0361(12)
F9 0.0378(11) 0.0768(15) 0.0526(12) 0.0145(10) -0.0033(9) 0.0258(10)
F10 0.0270(8) 0.0426(10) 0.0365(9) 0.0072(7) 0.0079(7) 0.0002(7)
O1 0.0336(11) 0.0389(11) 0.0203(9) 0.0076(8) -0.0093(8) -0.0096(9)
O2 0.0546(13) 0.0395(12) 0.0170(9) -0.0037(8) -0.0009(9) -0.0136(10)
O3 0.0349(10) 0.0255(9) 0.0216(9) -0.0083(7) 0.0054(8) -0.0038(8)
O14 0.0411(11) 0.0219(9) 0.0336(11) 0.0092(8) 0.0045(9) 0.0080(8)
O15 0.0516(14) 0.0328(11) 0.0430(13) 0.0171(10) -0.0152(10) 0.0040(10)
C1 0.0257(13) 0.0325(14) 0.0174(12) 0.0060(10) 0.0000(10) -0.0083(11)
C2 0.0295(14) 0.0316(14) 0.0161(12) -0.0010(10) 0.0013(10) -0.0115(11)
C3 0.0250(13) 0.0247(13) 0.0194(12) -0.0018(10) 0.0078(10) -0.0067(10)
C4 0.0232(12) 0.0221(12) 0.0154(11) 0.0003(9) 0.0037(9) -0.0034(10)
C5 0.0206(12) 0.0211(12) 0.0170(11) 0.0016(9) 0.0035(9) -0.0048(10)
C6 0.0192(12) 0.0184(12) 0.0169(11) 0.0007(9) 0.0038(9) -0.0018(9)
C7 0.0223(12) 0.0143(11) 0.0169(11) 0.0003(9) 0.0039(9) 0.0003(9)
C8 0.0204(12) 0.0160(11) 0.0183(11) 0.0011(9) 0.0034(9) -0.0003(9)
C9 0.0242(13) 0.0175(12) 0.0176(12) 0.0006(9) 0.0026(10) -0.0013(10)
C10 0.0261(13) 0.0135(11) 0.0229(12) 0.0005(9) 0.0037(10) -0.0011(9)
C11 0.0190(12) 0.0186(12) 0.0169(11) 0.0027(9) 0.0049(9) -0.0011(9)
C12 0.0196(12) 0.0194(12) 0.0192(12) 0.0054(9) 0.0049(9) -0.0010(9)
C13 0.0251(13) 0.0222(12) 0.0224(12) 0.0055(10) 0.0056(10) 0.0012(10)
C14 0.0267(13) 0.0203(12) 0.0313(14) 0.0100(11) 0.0088(11) 0.0023(10)
C15 0.0268(14) 0.0330(15) 0.0291(14) 0.0154(12) -0.0021(11) 0.0013(12)
C16 0.0305(14) 0.0294(14) 0.0249(13) 0.0093(11) -0.0042(11) -0.0035(11)
C17 0.0206(12) 0.0256(13) 0.0205(12) 0.0075(10) 0.0032(10) -0.0024(10)
C18 0.0208(12) 0.0245(13) 0.0181(12) 0.0027(10) 0.0026(9) -0.0060(10)
C19 0.0278(15) 0.054(2) 0.0342(16) -0.0016(14) -0.0033(12) 0.0000(14)
C20 0.0471(18) 0.0404(17) 0.0216(14) 0.0006(12) 0.0038(12) 0.0046(14)
C21 0.0291(14) 0.0253(13) 0.0274(14) -0.0082(11) 0.0040(11) -0.0011(11)
C22 0.0304(13) 0.0165(12) 0.0129(11) -0.0006(9) 0.0020(10) -0.0025(10)
C23 0.0301(14) 0.0240(13) 0.0160(12) 0.0019(10) -0.0002(10) -0.0046(11)
C24 0.0403(16) 0.0333(15) 0.0195(13) 0.0031(11) 0.0001(11) -0.0165(13)
C25 0.0588(19) 0.0166(13) 0.0224(13) 0.0029(10) 0.0018(13) -0.0138(13)
C26 0.0538(18) 0.0153(12) 0.0201(13) 0.0008(10) 0.0024(12) 0.0029(12)
C27 0.0329(14) 0.0207(12) 0.0161(12) 0.0001(9) 0.0025(10) -0.0004(11)
C28 0.0276(13) 0.0136(11) 0.0156(11) -0.0022(9) 0.0005(10) -0.0002(9)
C29 0.0304(14) 0.0207(12) 0.0189(12) -0.0003(10) 0.0022(10) 0.0002(10)
C30 0.0486(18) 0.0268(14) 0.0206(13) 0.0053(11) 0.0082(12) 0.0018(13)
C31 0.0528(19) 0.0354(16) 0.0213(14) 0.0084(12) -0.0006(13) 0.0155(14)
C32 0.0327(16) 0.0400(17) 0.0319(15) 0.0022(13) -0.0030(12) 0.0140(13)
C33 0.0283(14) 0.0250(13) 0.0223(13) 0.0008(10) 0.0019(10) 0.0016(11)
C34 0.0368(15) 0.0186(12) 0.0235(13) 0.0000(10) -0.0040(11) -0.0029(11)
C35 0.0517(19) 0.0214(14) 0.0332(15) 0.0070(11) 0.0088(14) 0.0074(13)
C36 0.132(4) 0.042(2) 0.058(3) 0.0198(19) -0.059(3) 0.000(2)
F1A 0.0228(7) 0.0188(7) 0.0366(9) -0.0051(6) 0.0054(6) -0.0035(6)
F2A 0.0291(9) 0.0290(9) 0.0726(13) -0.0090(8) 0.0220(9) 0.0046(7)
F3A 0.0583(12) 0.0208(8) 0.0634(12) -0.0183(8) 0.0249(10) 0.0023(8)
F4A 0.0466(10) 0.0208(8) 0.0386(9) -0.0121(7) 0.0024(8) -0.0113(7)
F5A 0.0223(8) 0.0234(8) 0.0338(8) -0.0032(6) 0.0006(6) -0.0038(6)
F6A 0.0251(8) 0.0315(8) 0.0226(7) -0.0037(6) 0.0053(6) -0.0033(6)
F7A 0.0616(12) 0.0461(10) 0.0192(8) -0.0069(7) 0.0121(8) 0.0047(9)
F8A 0.0731(14) 0.0489(11) 0.0238(9) -0.0134(8) -0.0205(9) 0.0034(10)
F9A 0.0334(10) 0.0400(10) 0.0582(12) -0.0104(9) -0.0225(8) 0.0006(8)
F10A 0.0234(8) 0.0305(8) 0.0424(9) -0.0024(7) 0.0060(7) 0.0003(6)
O1A 0.0952(19) 0.0248(11) 0.0264(11) 0.0029(9) -0.0299(12) -0.0065(11)
O2A 0.0260(9) 0.0200(9) 0.0219(9) 0.0064(7) -0.0011(7) 0.0025(7)
O3A 0.0354(10) 0.0126(8) 0.0242(9) 0.0008(7) -0.0017(8) 0.0023(7)
O13A 0.0341(10) 0.0150(8) 0.0290(10) -0.0065(7) -0.0016(8) -0.0008(7)
O14A 0.0279(10) 0.0238(9) 0.0247(9) -0.0093(7) -0.0032(7) -0.0017(7)
C1A 0.0234(13) 0.0220(12) 0.0194(12) -0.0001(10) -0.0006(10) -0.0025(10)
C2A 0.0197(12) 0.0190(12) 0.0180(11) 0.0045(9) 0.0028(9) 0.0019(9)
C3A 0.0225(12) 0.0147(11) 0.0225(12) -0.0003(9) 0.0049(10) 0.0012(9)
C4A 0.0229(12) 0.0173(12) 0.0178(12) -0.0022(9) 0.0015(9) -0.0001(9)
C5A 0.0177(11) 0.0156(11) 0.0174(11) 0.0011(9) 0.0045(9) 0.0006(9)
C6A 0.0159(11) 0.0142(11) 0.0178(11) -0.0004(9) 0.0048(9) -0.0012(9)
C7A 0.0194(12) 0.0135(11) 0.0173(11) 0.0000(9) 0.0038(9) -0.0007(9)
C8A 0.0178(11) 0.0169(11) 0.0153(11) -0.0007(9) 0.0031(9) -0.0006(9)
C9A 0.0209(12) 0.0163(11) 0.0190(12) 0.0010(9) 0.0037(9) 0.0014(9)
C10A 0.0235(12) 0.0124(11) 0.0198(12) -0.0021(9) 0.0054(10) 0.0024(9)
C11A 0.0184(11) 0.0151(11) 0.0162(11) -0.0005(9) 0.0050(9) -0.0007(9)
C12A 0.0195(12) 0.0153(11) 0.0173(11) -0.0014(9) 0.0062(9) -0.0020(9)
C13A 0.0220(12) 0.0172(12) 0.0189(12) 0.0001(9) 0.0040(9) 0.0003(9)
C14A 0.0238(12) 0.0156(11) 0.0223(12) -0.0036(9) 0.0067(10) -0.0024(9)
C15A 0.0210(12) 0.0224(12) 0.0201(12) -0.0060(10) 0.0037(10) -0.0041(10)
C16A 0.0218(12) 0.0204(12) 0.0181(12) -0.0018(9) 0.0025(9) -0.0015(10)
C17A 0.0191(12) 0.0172(11) 0.0184(12) -0.0016(9) 0.0051(9) -0.0011(9)
C18A 0.0188(12) 0.0166(11) 0.0173(11) -0.0002(9) 0.0029(9) -0.0006(9)
C19A 0.097(5) 0.044(3) 0.022(2) -0.0041(19) 0.004(2) 0.001(3)
C19B 0.053(8) 0.029(6) 0.040(7) -0.002(5) -0.020(5) -0.005(5)
C20A 0.0317(16) 0.0481(19) 0.0457(18) 0.0197(15) 0.0017(14) 0.0138(14)
C21A 0.0473(17) 0.0163(12) 0.0261(14) -0.0031(10) -0.0016(12) 0.0020(12)
C22A 0.0258(12) 0.0129(11) 0.0140(11) -0.0005(8) 0.0021(9) -0.0004(9)
C23A 0.0250(13) 0.0135(11) 0.0220(12) -0.0013(9) 0.0031(10) -0.0018(9)
C24A 0.0295(14) 0.0205(13) 0.0338(15) -0.0003(11) 0.0112(12) 0.0037(11)
C25A 0.0429(16) 0.0148(12) 0.0296(14) -0.0060(10) 0.0114(12) 0.0032(11)
C26A 0.0373(15) 0.0151(12) 0.0215(12) -0.0050(10) 0.0009(11) -0.0052(11)
C27A 0.0231(12) 0.0194(12) 0.0175(12) -0.0003(9) 0.0002(9) -0.0019(10)
C28A 0.0252(13) 0.0136(11) 0.0172(11) 0.0011(9) -0.0001(9) 0.0012(9)
C29A 0.0262(13) 0.0162(11) 0.0206(12) 0.0004(9) -0.0001(10) 0.0011(10)
C30A 0.0425(16) 0.0230(13) 0.0190(13) -0.0021(10) 0.0038(11) 0.0043(12)
C31A 0.0517(18) 0.0232(13) 0.0202(13) -0.0062(11) -0.0126(12) 0.0058(13)
C32A 0.0303(15) 0.0202(13) 0.0374(16) -0.0022(11) -0.0134(12) 0.0004(11)
C33A 0.0252(13) 0.0175(12) 0.0275(13) 0.0001(10) 0.0005(10) 0.0025(10)
C34A 0.0304(14) 0.0192(12) 0.0222(13) -0.0002(10) -0.0022(11) 0.0055(10)
C35A 0.0423(16) 0.0135(12) 0.0323(15) -0.0021(11) 0.0003(12) -0.0015(11)
C36A 0.0342(15) 0.0306(14) 0.0246(14) -0.0086(11) -0.0065(11) -0.0024(12)
O1S 0.341(9) 0.149(4) 0.122(4) 0.047(3) 0.099(5) 0.174(6)
O2S 0.149(4) 0.097(3) 0.080(3) 0.014(2) 0.015(2) 0.023(3)
C37 0.140(5) 0.084(4) 0.072(3) 0.017(3) 0.001(3) 0.019(4)
C38 0.177(7) 0.129(6) 0.062(3) 0.030(3) 0.037(4) 0.105(6)
C39 0.236(10) 0.092(5) 0.088(4) 0.043(4) 0.023(5) -0.026(6)
C40 0.162(6) 0.074(3) 0.060(3) 0.019(2) 0.025(3) 0.046(4)
 
_geom_special_details
;
 All esds (except the esd in the dihedral angle between two l.s. planes)
 are estimated using the full covariance matrix.  The cell esds are taken
 into account individually in the estimation of esds in distances, angles
 and torsion angles; correlations between esds in cell parameters are only
 used when they are defined by crystal symmetry.  An approximate (isotropic)
 treatment of cell esds is used for estimating esds involving l.s. planes.
;
 
loop_
 _geom_bond_atom_site_label_1
 _geom_bond_atom_site_label_2
 _geom_bond_distance
 _geom_bond_site_symmetry_2
 _geom_bond_publ_flag
F1 C23 1.342(3) . ?
F2 C24 1.339(3) . ?
F3 C25 1.345(3) . ?
F4 C26 1.344(3) . ?
F5 C27 1.343(3) . ?
F6 C29 1.345(3) . ?
F7 C30 1.344(3) . ?
F8 C31 1.337(3) . ?
F9 C32 1.337(3) . ?
F10 C33 1.342(3) . ?
O1 C1 1.382(3) . ?
O1 C19 1.433(3) . ?
O2 C2 1.382(3) . ?
O2 C20 1.421(3) . ?
O3 C3 1.363(3) . ?
O3 C21 1.432(3) . ?
O14 C14 1.362(3) . ?
O14 C35 1.428(4) . ?
O15 C15 1.370(3) . ?
O15 C36 1.430(4) . ?
C1 C2 1.382(4) . ?
C1 C18 1.436(4) . ?
C2 C3 1.400(4) . ?
C3 C4 1.372(3) . ?
C4 C5 1.403(3) . ?
C4 H4 0.9500 . ?
C5 C18 1.419(3) . ?
C5 C6 1.465(3) . ?
C6 C11 1.410(3) . ?
C6 C7 1.423(3) . ?
C7 C8 1.392(3) . ?
C7 C22 1.501(3) . ?
C8 C9 1.407(3) . ?
C8 C28 1.491(3) . ?
C9 C10 1.373(3) . ?
C9 C34 1.504(3) . ?
C10 C11 1.405(3) . ?
C10 H10 0.9500 . ?
C11 C12 1.458(3) . ?
C12 C17 1.408(4) . ?
C12 C13 1.411(3) . ?
C13 C14 1.369(4) . ?
C13 H13 0.9500 . ?
C14 C15 1.405(4) . ?
C15 C16 1.371(4) . ?
C16 C17 1.420(4) . ?
C16 H16 0.9500 . ?
C17 C18 1.466(4) . ?
C19 H19D 0.9800 . ?
C19 H19E 0.9800 . ?
C19 H19F 0.9800 . ?
C20 H20D 0.9800 . ?
C20 H20E 0.9800 . ?
C20 H20F 0.9800 . ?
C21 H21D 0.9800 . ?
C21 H21E 0.9800 . ?
C21 H21F 0.9800 . ?
C22 C27 1.387(4) . ?
C22 C23 1.390(4) . ?
C23 C24 1.384(4) . ?
C24 C25 1.369(4) . ?
C25 C26 1.371(4) . ?
C26 C27 1.381(4) . ?
C28 C33 1.388(4) . ?
C28 C29 1.389(3) . ?
C29 C30 1.376(4) . ?
C30 C31 1.379(4) . ?
C31 C32 1.380(4) . ?
C32 C33 1.377(4) . ?
C34 H34D 0.9800 . ?
C34 H34E 0.9800 . ?
C34 H34F 0.9800 . ?
C35 H35D 0.9800 . ?
C35 H35E 0.9800 . ?
C35 H35F 0.9800 . ?
C36 H36D 0.9800 . ?
C36 H36E 0.9800 . ?
C36 H36F 0.9800 . ?
F1A C23A 1.338(3) . ?
F2A C24A 1.335(3) . ?
F3A C25A 1.336(3) . ?
F4A C26A 1.343(3) . ?
F5A C27A 1.343(3) . ?
F6A C29A 1.343(3) . ?
F7A C30A 1.341(3) . ?
F8A C31A 1.338(3) . ?
F9A C32A 1.341(3) . ?
F10A C33A 1.338(3) . ?
O1A C19B 1.203(11) . ?
O1A C19A 1.355(5) . ?
O1A C1A 1.364(3) . ?
O2A C2A 1.375(3) . ?
O2A C20A 1.430(3) . ?
O3A C3A 1.368(3) . ?
O3A C21A 1.421(3) . ?
O13A C14A 1.363(3) . ?
O13A C35A 1.425(3) . ?
O14A C15A 1.368(3) . ?
O14A C36A 1.426(3) . ?
C1A C2A 1.375(3) . ?
C1A C18A 1.431(3) . ?
C2A C3A 1.400(3) . ?
C3A C4A 1.370(3) . ?
C4A C5A 1.409(3) . ?
C4A H4A 0.9500 . ?
C5A C18A 1.422(3) . ?
C5A C6A 1.473(3) . ?
C6A C11A 1.414(3) . ?
C6A C7A 1.430(3) . ?
C7A C8A 1.394(3) . ?
C7A C22A 1.503(3) . ?
C8A C9A 1.409(3) . ?
C8A C28A 1.494(3) . ?
C9A C10A 1.374(3) . ?
C9A C34A 1.508(3) . ?
C10A C11A 1.407(3) . ?
C10A H10A 0.9500 . ?
C11A C12A 1.457(3) . ?
C12A C17A 1.405(3) . ?
C12A C13A 1.413(3) . ?
C13A C14A 1.372(3) . ?
C13A H13A 0.9500 . ?
C14A C15A 1.405(4) . ?
C15A C16A 1.371(3) . ?
C16A C17A 1.419(3) . ?
C16A H16A 0.9500 . ?
C17A C18A 1.466(3) . ?
C19A H19A 0.9800 . ?
C19A H19B 0.9800 . ?
C19A H19C 0.9800 . ?
C19B H19G 0.9800 . ?
C19B H19H 0.9800 . ?
C19B H19I 0.9800 . ?
C20A H20A 0.9800 . ?
C20A H20B 0.9800 . ?
C20A H20C 0.9800 . ?
C21A H21A 0.9800 . ?
C21A H21B 0.9800 . ?
C21A H21C 0.9800 . ?
C22A C27A 1.389(3) . ?
C22A C23A 1.392(3) . ?
C23A C24A 1.380(3) . ?
C24A C25A 1.380(4) . ?
C25A C26A 1.378(4) . ?
C26A C27A 1.379(3) . ?
C28A C33A 1.388(4) . ?
C28A C29A 1.392(3) . ?
C29A C30A 1.374(4) . ?
C30A C31A 1.373(4) . ?
C31A C32A 1.376(4) . ?
C32A C33A 1.384(4) . ?
C34A H34A 0.9800 . ?
C34A H34B 0.9800 . ?
C34A H34C 0.9800 . ?
C35A H35A 0.9800 . ?
C35A H35B 0.9800 . ?
C35A H35C 0.9800 . ?
C36A H36A 0.9800 . ?
C36A H36B 0.9800 . ?
C36A H36C 0.9800 . ?
O1S C38 1.137(6) . ?
O2S C38 1.368(8) . ?
O2S C39 1.535(8) . ?
C37 C38 1.578(10) . ?
C37 H37A 0.9800 . ?
C37 H37B 0.9800 . ?
C37 H37C 0.9800 . ?
C39 C40 1.516(9) . ?
C39 H39A 0.9900 . ?
C39 H39B 0.9900 . ?
C40 H40A 0.9800 . ?
C40 H40B 0.9800 . ?
C40 H40C 0.9800 . ?
 
loop_
 _geom_angle_atom_site_label_1
 _geom_angle_atom_site_label_2
 _geom_angle_atom_site_label_3
 _geom_angle
 _geom_angle_site_symmetry_1
 _geom_angle_site_symmetry_3
 _geom_angle_publ_flag
C1 O1 C19 115.6(2) . . ?
C2 O2 C20 116.5(2) . . ?
C3 O3 C21 116.45(19) . . ?
C14 O14 C35 117.0(2) . . ?
C15 O15 C36 115.8(3) . . ?
C2 C1 O1 117.0(2) . . ?
C2 C1 C18 122.4(2) . . ?
O1 C1 C18 120.5(2) . . ?
O2 C2 C1 122.9(2) . . ?
O2 C2 C3 117.0(2) . . ?
C1 C2 C3 120.1(2) . . ?
O3 C3 C4 124.4(2) . . ?
O3 C3 C2 116.8(2) . . ?
C4 C3 C2 118.8(2) . . ?
C3 C4 C5 122.3(2) . . ?
C3 C4 H4 118.8 . . ?
C5 C4 H4 118.8 . . ?
C4 C5 C18 120.2(2) . . ?
C4 C5 C6 118.9(2) . . ?
C18 C5 C6 120.7(2) . . ?
C11 C6 C7 117.7(2) . . ?
C11 C6 C5 118.7(2) . . ?
C7 C6 C5 123.7(2) . . ?
C8 C7 C6 120.8(2) . . ?
C8 C7 C22 116.3(2) . . ?
C6 C7 C22 122.3(2) . . ?
C7 C8 C9 120.6(2) . . ?
C7 C8 C28 120.7(2) . . ?
C9 C8 C28 118.6(2) . . ?
C10 C9 C8 117.8(2) . . ?
C10 C9 C34 120.8(2) . . ?
C8 C9 C34 121.2(2) . . ?
C9 C10 C11 123.2(2) . . ?
C9 C10 H10 118.4 . . ?
C11 C10 H10 118.4 . . ?
C10 C11 C6 118.8(2) . . ?
C10 C11 C12 121.8(2) . . ?
C6 C11 C12 119.3(2) . . ?
C17 C12 C13 119.7(2) . . ?
C17 C12 C11 121.1(2) . . ?
C13 C12 C11 119.0(2) . . ?
C14 C13 C12 121.9(2) . . ?
C14 C13 H13 119.0 . . ?
C12 C13 H13 119.0 . . ?
O14 C14 C13 124.8(3) . . ?
O14 C14 C15 116.4(2) . . ?
C13 C14 C15 118.8(2) . . ?
O15 C15 C16 124.2(3) . . ?
O15 C15 C14 115.4(2) . . ?
C16 C15 C14 120.3(2) . . ?
C15 C16 C17 122.0(3) . . ?
C15 C16 H16 119.0 . . ?
C17 C16 H16 119.0 . . ?
C12 C17 C16 117.2(2) . . ?
C12 C17 C18 119.4(2) . . ?
C16 C17 C18 123.4(2) . . ?
C5 C18 C1 115.8(2) . . ?
C5 C18 C17 119.0(2) . . ?
C1 C18 C17 125.1(2) . . ?
O1 C19 H19D 109.5 . . ?
O1 C19 H19E 109.5 . . ?
H19D C19 H19E 109.5 . . ?
O1 C19 H19F 109.5 . . ?
H19D C19 H19F 109.5 . . ?
H19E C19 H19F 109.5 . . ?
O2 C20 H20D 109.5 . . ?
O2 C20 H20E 109.5 . . ?
H20D C20 H20E 109.5 . . ?
O2 C20 H20F 109.5 . . ?
H20D C20 H20F 109.5 . . ?
H20E C20 H20F 109.5 . . ?
O3 C21 H21D 109.5 . . ?
O3 C21 H21E 109.5 . . ?
H21D C21 H21E 109.5 . . ?
O3 C21 H21F 109.5 . . ?
H21D C21 H21F 109.5 . . ?
H21E C21 H21F 109.5 . . ?
C27 C22 C23 116.2(2) . . ?
C27 C22 C7 124.3(2) . . ?
C23 C22 C7 119.4(2) . . ?
F1 C23 C24 117.9(2) . . ?
F1 C23 C22 119.8(2) . . ?
C24 C23 C22 122.4(3) . . ?
F2 C24 C25 120.7(2) . . ?
F2 C24 C23 120.0(3) . . ?
C25 C24 C23 119.3(3) . . ?
F3 C25 C24 120.1(3) . . ?
F3 C25 C26 119.7(3) . . ?
C24 C25 C26 120.2(2) . . ?
F4 C26 C25 120.4(2) . . ?
F4 C26 C27 119.9(3) . . ?
C25 C26 C27 119.7(3) . . ?
F5 C27 C26 118.0(2) . . ?
F5 C27 C22 119.8(2) . . ?
C26 C27 C22 122.2(3) . . ?
C33 C28 C29 116.3(2) . . ?
C33 C28 C8 120.7(2) . . ?
C29 C28 C8 123.0(2) . . ?
F6 C29 C30 118.3(2) . . ?
F6 C29 C28 119.6(2) . . ?
C30 C29 C28 122.1(3) . . ?
F7 C30 C29 120.2(3) . . ?
F7 C30 C31 120.1(2) . . ?
C29 C30 C31 119.7(3) . . ?
F8 C31 C30 120.1(3) . . ?
F8 C31 C32 119.8(3) . . ?
C30 C31 C32 120.1(3) . . ?
F9 C32 C33 120.7(3) . . ?
F9 C32 C31 120.3(3) . . ?
C33 C32 C31 118.9(3) . . ?
F10 C33 C32 117.7(2) . . ?
F10 C33 C28 119.4(2) . . ?
C32 C33 C28 122.8(2) . . ?
C9 C34 H34D 109.5 . . ?
C9 C34 H34E 109.5 . . ?
H34D C34 H34E 109.5 . . ?
C9 C34 H34F 109.5 . . ?
H34D C34 H34F 109.5 . . ?
H34E C34 H34F 109.5 . . ?
O14 C35 H35D 109.5 . . ?
O14 C35 H35E 109.5 . . ?
H35D C35 H35E 109.5 . . ?
O14 C35 H35F 109.5 . . ?
H35D C35 H35F 109.5 . . ?
H35E C35 H35F 109.5 . . ?
O15 C36 H36D 109.5 . . ?
O15 C36 H36E 109.5 . . ?
H36D C36 H36E 109.5 . . ?
O15 C36 H36F 109.5 . . ?
H36D C36 H36F 109.5 . . ?
H36E C36 H36F 109.5 . . ?
C19B O1A C1A 140.3(6) . . ?
C19A O1A C1A 120.7(3) . . ?
C2A O2A C20A 112.05(19) . . ?
C3A O3A C21A 117.81(19) . . ?
C14A O13A C35A 116.8(2) . . ?
C15A O14A C36A 116.7(2) . . ?
O1A C1A C2A 117.1(2) . . ?
O1A C1A C18A 120.8(2) . . ?
C2A C1A C18A 122.1(2) . . ?
O2A C2A C1A 120.4(2) . . ?
O2A C2A C3A 119.2(2) . . ?
C1A C2A C3A 120.2(2) . . ?
O3A C3A C4A 125.9(2) . . ?
O3A C3A C2A 114.6(2) . . ?
C4A C3A C2A 119.4(2) . . ?
C3A C4A C5A 121.8(2) . . ?
C3A C4A H4A 119.1 . . ?
C5A C4A H4A 119.1 . . ?
C4A C5A C18A 119.8(2) . . ?
C4A C5A C6A 120.4(2) . . ?
C18A C5A C6A 119.7(2) . . ?
C11A C6A C7A 117.3(2) . . ?
C11A C6A C5A 118.7(2) . . ?
C7A C6A C5A 124.0(2) . . ?
C8A C7A C6A 121.3(2) . . ?
C8A C7A C22A 115.9(2) . . ?
C6A C7A C22A 122.3(2) . . ?
C7A C8A C9A 120.4(2) . . ?
C7A C8A C28A 121.3(2) . . ?
C9A C8A C28A 118.3(2) . . ?
C10A C9A C8A 117.9(2) . . ?
C10A C9A C34A 120.0(2) . . ?
C8A C9A C34A 121.9(2) . . ?
C9A C10A C11A 123.4(2) . . ?
C9A C10A H10A 118.3 . . ?
C11A C10A H10A 118.3 . . ?
C10A C11A C6A 118.9(2) . . ?
C10A C11A C12A 120.9(2) . . ?
C6A C11A C12A 120.1(2) . . ?
C17A C12A C13A 119.3(2) . . ?
C17A C12A C11A 120.6(2) . . ?
C13A C12A C11A 120.0(2) . . ?
C14A C13A C12A 121.8(2) . . ?
C14A C13A H13A 119.1 . . ?
C12A C13A H13A 119.1 . . ?
O13A C14A C13A 125.4(2) . . ?
O13A C14A C15A 115.5(2) . . ?
C13A C14A C15A 119.2(2) . . ?
O14A C15A C16A 124.4(2) . . ?
O14A C15A C14A 115.7(2) . . ?
C16A C15A C14A 119.9(2) . . ?
C15A C16A C17A 122.0(2) . . ?
C15A C16A H16A 119.0 . . ?
C17A C16A H16A 119.0 . . ?
C12A C17A C16A 117.8(2) . . ?
C12A C17A C18A 119.5(2) . . ?
C16A C17A C18A 122.7(2) . . ?
C5A C18A C1A 116.5(2) . . ?
C5A C18A C17A 119.9(2) . . ?
C1A C18A C17A 123.5(2) . . ?
O1A C19A H19A 109.5 . . ?
O1A C19A H19B 109.5 . . ?
H19A C19A H19B 109.5 . . ?
O1A C19A H19C 109.5 . . ?
H19A C19A H19C 109.5 . . ?
H19B C19A H19C 109.5 . . ?
O1A C19B H19G 109.5 . . ?
O1A C19B H19H 109.5 . . ?
H19G C19B H19H 109.5 . . ?
O1A C19B H19I 109.5 . . ?
H19G C19B H19I 109.5 . . ?
H19H C19B H19I 109.5 . . ?
O2A C20A H20A 109.5 . . ?
O2A C20A H20B 109.5 . . ?
H20A C20A H20B 109.5 . . ?
O2A C20A H20C 109.5 . . ?
H20A C20A H20C 109.5 . . ?
H20B C20A H20C 109.5 . . ?
O3A C21A H21A 109.5 . . ?
O3A C21A H21B 109.5 . . ?
H21A C21A H21B 109.5 . . ?
O3A C21A H21C 109.5 . . ?
H21A C21A H21C 109.5 . . ?
H21B C21A H21C 109.5 . . ?
C27A C22A C23A 116.2(2) . . ?
C27A C22A C7A 123.3(2) . . ?
C23A C22A C7A 120.4(2) . . ?
F1A C23A C24A 117.8(2) . . ?
F1A C23A C22A 119.6(2) . . ?
C24A C23A C22A 122.6(2) . . ?
F2A C24A C25A 119.9(2) . . ?
F2A C24A C23A 120.9(2) . . ?
C25A C24A C23A 119.3(2) . . ?
F3A C25A C26A 120.1(2) . . ?
F3A C25A C24A 119.9(2) . . ?
C26A C25A C24A 119.9(2) . . ?
F4A C26A C25A 120.1(2) . . ?
F4A C26A C27A 120.2(2) . . ?
C25A C26A C27A 119.7(2) . . ?
F5A C27A C26A 118.0(2) . . ?
F5A C27A C22A 119.7(2) . . ?
C26A C27A C22A 122.3(2) . . ?
C33A C28A C29A 115.9(2) . . ?
C33A C28A C8A 121.2(2) . . ?
C29A C28A C8A 122.9(2) . . ?
F6A C29A C30A 117.4(2) . . ?
F6A C29A C28A 120.0(2) . . ?
C30A C29A C28A 122.5(2) . . ?
F7A C30A C31A 120.1(2) . . ?
F7A C30A C29A 120.0(3) . . ?
C31A C30A C29A 119.9(3) . . ?
F8A C31A C30A 120.0(3) . . ?
F8A C31A C32A 120.2(3) . . ?
C30A C31A C32A 119.7(2) . . ?
F9A C32A C31A 120.4(3) . . ?
F9A C32A C33A 120.2(3) . . ?
C31A C32A C33A 119.4(3) . . ?
F10A C33A C32A 117.8(2) . . ?
F10A C33A C28A 119.6(2) . . ?
C32A C33A C28A 122.5(2) . . ?
C9A C34A H34A 109.5 . . ?
C9A C34A H34B 109.5 . . ?
H34A C34A H34B 109.5 . . ?
C9A C34A H34C 109.5 . . ?
H34A C34A H34C 109.5 . . ?
H34B C34A H34C 109.5 . . ?
O13A C35A H35A 109.5 . . ?
O13A C35A H35B 109.5 . . ?
H35A C35A H35B 109.5 . . ?
O13A C35A H35C 109.5 . . ?
H35A C35A H35C 109.5 . . ?
H35B C35A H35C 109.5 . . ?
O14A C36A H36A 109.5 . . ?
O14A C36A H36B 109.5 . . ?
H36A C36A H36B 109.5 . . ?
O14A C36A H36C 109.5 . . ?
H36A C36A H36C 109.5 . . ?
H36B C36A H36C 109.5 . . ?
C38 O2S C39 117.6(6) . . ?
C38 C37 H37A 109.5 . . ?
C38 C37 H37B 109.5 . . ?
H37A C37 H37B 109.5 . . ?
C38 C37 H37C 109.5 . . ?
H37A C37 H37C 109.5 . . ?
H37B C37 H37C 109.5 . . ?
O1S C38 O2S 130.5(10) . . ?
O1S C38 C37 117.6(8) . . ?
O2S C38 C37 111.9(5) . . ?
C40 C39 O2S 107.8(6) . . ?
C40 C39 H39A 110.1 . . ?
O2S C39 H39A 110.1 . . ?
C40 C39 H39B 110.1 . . ?
O2S C39 H39B 110.1 . . ?
H39A C39 H39B 108.5 . . ?
C39 C40 H40A 109.5 . . ?
C39 C40 H40B 109.5 . . ?
H40A C40 H40B 109.5 . . ?
C39 C40 H40C 109.5 . . ?
H40A C40 H40C 109.5 . . ?
H40B C40 H40C 109.5 . . ?
 
loop_
 _geom_torsion_atom_site_label_1
 _geom_torsion_atom_site_label_2
 _geom_torsion_atom_site_label_3
 _geom_torsion_atom_site_label_4
 _geom_torsion
 _geom_torsion_site_symmetry_1
 _geom_torsion_site_symmetry_2
 _geom_torsion_site_symmetry_3
 _geom_torsion_site_symmetry_4
 _geom_torsion_publ_flag
C19 O1 C1 C2 -72.1(3) . . . . ?
C19 O1 C1 C18 112.0(3) . . . . ?
C20 O2 C2 C1 -67.2(3) . . . . ?
C20 O2 C2 C3 114.4(3) . . . . ?
O1 C1 C2 O2 8.3(4) . . . . ?
C18 C1 C2 O2 -176.0(2) . . . . ?
O1 C1 C2 C3 -173.5(2) . . . . ?
C18 C1 C2 C3 2.3(4) . . . . ?
C21 O3 C3 C4 -5.0(3) . . . . ?
C21 O3 C3 C2 176.1(2) . . . . ?
O2 C2 C3 O3 -5.2(3) . . . . ?
C1 C2 C3 O3 176.4(2) . . . . ?
O2 C2 C3 C4 175.8(2) . . . . ?
C1 C2 C3 C4 -2.5(4) . . . . ?
O3 C3 C4 C5 179.4(2) . . . . ?
C2 C3 C4 C5 -1.7(4) . . . . ?
C3 C4 C5 C18 6.3(4) . . . . ?
C3 C4 C5 C6 -179.1(2) . . . . ?
C4 C5 C6 C11 -160.5(2) . . . . ?
C18 C5 C6 C11 14.1(3) . . . . ?
C4 C5 C6 C7 18.2(3) . . . . ?
C18 C5 C6 C7 -167.2(2) . . . . ?
C11 C6 C7 C8 11.3(3) . . . . ?
C5 C6 C7 C8 -167.5(2) . . . . ?
C11 C6 C7 C22 -159.2(2) . . . . ?
C5 C6 C7 C22 22.1(4) . . . . ?
C6 C7 C8 C9 -3.2(4) . . . . ?
C22 C7 C8 C9 167.8(2) . . . . ?
C6 C7 C8 C28 176.8(2) . . . . ?
C22 C7 C8 C28 -12.2(3) . . . . ?
C7 C8 C9 C10 -4.6(4) . . . . ?
C28 C8 C9 C10 175.3(2) . . . . ?
C7 C8 C9 C34 -179.8(2) . . . . ?
C28 C8 C9 C34 0.1(4) . . . . ?
C8 C9 C10 C11 4.3(4) . . . . ?
C34 C9 C10 C11 179.6(2) . . . . ?
C9 C10 C11 C6 3.9(4) . . . . ?
C9 C10 C11 C12 -174.0(2) . . . . ?
C7 C6 C11 C10 -11.4(3) . . . . ?
C5 C6 C11 C10 167.3(2) . . . . ?
C7 C6 C11 C12 166.4(2) . . . . ?
C5 C6 C11 C12 -14.8(3) . . . . ?
C10 C11 C12 C17 -176.7(2) . . . . ?
C6 C11 C12 C17 5.5(3) . . . . ?
C10 C11 C12 C13 7.3(3) . . . . ?
C6 C11 C12 C13 -170.5(2) . . . . ?
C17 C12 C13 C14 1.3(4) . . . . ?
C11 C12 C13 C14 177.4(2) . . . . ?
C35 O14 C14 C13 0.2(4) . . . . ?
C35 O14 C14 C15 -179.4(2) . . . . ?
C12 C13 C14 O14 -179.0(2) . . . . ?
C12 C13 C14 C15 0.6(4) . . . . ?
C36 O15 C15 C16 9.2(5) . . . . ?
C36 O15 C15 C14 -170.8(3) . . . . ?
O14 C14 C15 O15 -2.3(4) . . . . ?
C13 C14 C15 O15 178.1(2) . . . . ?
O14 C14 C15 C16 177.7(2) . . . . ?
C13 C14 C15 C16 -1.9(4) . . . . ?
O15 C15 C16 C17 -178.6(3) . . . . ?
C14 C15 C16 C17 1.3(4) . . . . ?
C13 C12 C17 C16 -1.8(3) . . . . ?
C11 C12 C17 C16 -177.8(2) . . . . ?
C13 C12 C17 C18 -179.1(2) . . . . ?
C11 C12 C17 C18 4.9(3) . . . . ?
C15 C16 C17 C12 0.5(4) . . . . ?
C15 C16 C17 C18 177.7(2) . . . . ?
C4 C5 C18 C1 -6.2(3) . . . . ?
C6 C5 C18 C1 179.3(2) . . . . ?
C4 C5 C18 C17 170.7(2) . . . . ?
C6 C5 C18 C17 -3.8(3) . . . . ?
C2 C1 C18 C5 2.1(4) . . . . ?
O1 C1 C18 C5 177.7(2) . . . . ?
C2 C1 C18 C17 -174.6(2) . . . . ?
O1 C1 C18 C17 1.0(4) . . . . ?
C12 C17 C18 C5 -5.6(3) . . . . ?
C16 C17 C18 C5 177.2(2) . . . . ?
C12 C17 C18 C1 171.0(2) . . . . ?
C16 C17 C18 C1 -6.1(4) . . . . ?
C8 C7 C22 C27 68.3(3) . . . . ?
C6 C7 C22 C27 -120.8(3) . . . . ?
C8 C7 C22 C23 -108.1(3) . . . . ?
C6 C7 C22 C23 62.8(3) . . . . ?
C27 C22 C23 F1 -178.7(2) . . . . ?
C7 C22 C23 F1 -2.0(3) . . . . ?
C27 C22 C23 C24 1.2(4) . . . . ?
C7 C22 C23 C24 177.9(2) . . . . ?
F1 C23 C24 F2 -0.4(4) . . . . ?
C22 C23 C24 F2 179.7(2) . . . . ?
F1 C23 C24 C25 179.3(2) . . . . ?
C22 C23 C24 C25 -0.6(4) . . . . ?
F2 C24 C25 F3 0.4(4) . . . . ?
C23 C24 C25 F3 -179.2(2) . . . . ?
F2 C24 C25 C26 179.4(2) . . . . ?
C23 C24 C25 C26 -0.3(4) . . . . ?
F3 C25 C26 F4 -1.4(4) . . . . ?
C24 C25 C26 F4 179.7(2) . . . . ?
F3 C25 C26 C27 179.5(2) . . . . ?
C24 C25 C26 C27 0.6(4) . . . . ?
F4 C26 C27 F5 -1.6(4) . . . . ?
C25 C26 C27 F5 177.5(2) . . . . ?
F4 C26 C27 C22 -179.1(2) . . . . ?
C25 C26 C27 C22 0.1(4) . . . . ?
C23 C22 C27 F5 -178.3(2) . . . . ?
C7 C22 C27 F5 5.2(4) . . . . ?
C23 C22 C27 C26 -0.9(4) . . . . ?
C7 C22 C27 C26 -177.4(2) . . . . ?
C7 C8 C28 C33 -104.0(3) . . . . ?
C9 C8 C28 C33 76.0(3) . . . . ?
C7 C8 C28 C29 75.9(3) . . . . ?
C9 C8 C28 C29 -104.0(3) . . . . ?
C33 C28 C29 F6 -179.3(2) . . . . ?
C8 C28 C29 F6 0.7(4) . . . . ?
C33 C28 C29 C30 1.1(4) . . . . ?
C8 C28 C29 C30 -178.9(2) . . . . ?
F6 C29 C30 F7 -0.2(4) . . . . ?
C28 C29 C30 F7 179.4(2) . . . . ?
F6 C29 C30 C31 -179.8(2) . . . . ?
C28 C29 C30 C31 -0.2(4) . . . . ?
F7 C30 C31 F8 -0.5(4) . . . . ?
C29 C30 C31 F8 179.1(3) . . . . ?
F7 C30 C31 C32 179.8(3) . . . . ?
C29 C30 C31 C32 -0.6(5) . . . . ?
F8 C31 C32 F9 1.2(5) . . . . ?
C30 C31 C32 F9 -179.1(3) . . . . ?
F8 C31 C32 C33 -179.2(3) . . . . ?
C30 C31 C32 C33 0.5(5) . . . . ?
F9 C32 C33 F10 -1.0(4) . . . . ?
C31 C32 C33 F10 179.4(3) . . . . ?
F9 C32 C33 C28 -179.9(3) . . . . ?
C31 C32 C33 C28 0.4(4) . . . . ?
C29 C28 C33 F10 179.8(2) . . . . ?
C8 C28 C33 F10 -0.2(4) . . . . ?
C29 C28 C33 C32 -1.2(4) . . . . ?
C8 C28 C33 C32 178.7(2) . . . . ?
C19B O1A C1A C2A 29.0(11) . . . . ?
C19A O1A C1A C2A -59.2(4) . . . . ?
C19B O1A C1A C18A -149.5(10) . . . . ?
C19A O1A C1A C18A 122.3(4) . . . . ?
C20A O2A C2A C1A -99.6(3) . . . . ?
C20A O2A C2A C3A 85.4(3) . . . . ?
O1A C1A C2A O2A 4.1(4) . . . . ?
C18A C1A C2A O2A -177.4(2) . . . . ?
O1A C1A C2A C3A 179.1(2) . . . . ?
C18A C1A C2A C3A -2.4(4) . . . . ?
C21A O3A C3A C4A 1.0(4) . . . . ?
C21A O3A C3A C2A 178.5(2) . . . . ?
O2A C2A C3A O3A -1.2(3) . . . . ?
C1A C2A C3A O3A -176.2(2) . . . . ?
O2A C2A C3A C4A 176.5(2) . . . . ?
C1A C2A C3A C4A 1.5(4) . . . . ?
O3A C3A C4A C5A 179.8(2) . . . . ?
C2A C3A C4A C5A 2.3(4) . . . . ?
C3A C4A C5A C18A -5.2(4) . . . . ?
C3A C4A C5A C6A 178.9(2) . . . . ?
C4A C5A C6A C11A 163.3(2) . . . . ?
C18A C5A C6A C11A -12.6(3) . . . . ?
C4A C5A C6A C7A -16.7(3) . . . . ?
C18A C5A C6A C7A 167.4(2) . . . . ?
C11A C6A C7A C8A -8.4(3) . . . . ?
C5A C6A C7A C8A 171.6(2) . . . . ?
C11A C6A C7A C22A 164.0(2) . . . . ?
C5A C6A C7A C22A -16.0(3) . . . . ?
C6A C7A C8A C9A 1.0(3) . . . . ?
C22A C7A C8A C9A -171.8(2) . . . . ?
C6A C7A C8A C28A 179.4(2) . . . . ?
C22A C7A C8A C28A 6.5(3) . . . . ?
C7A C8A C9A C10A 4.5(3) . . . . ?
C28A C8A C9A C10A -173.9(2) . . . . ?
C7A C8A C9A C34A 179.1(2) . . . . ?
C28A C8A C9A C34A 0.7(3) . . . . ?
C8A C9A C10A C11A -2.6(4) . . . . ?
C34A C9A C10A C11A -177.2(2) . . . . ?
C9A C10A C11A C6A -5.0(3) . . . . ?
C9A C10A C11A C12A 172.0(2) . . . . ?
C7A C6A C11A C10A 10.1(3) . . . . ?
C5A C6A C11A C10A -169.9(2) . . . . ?
C7A C6A C11A C12A -166.8(2) . . . . ?
C5A C6A C11A C12A 13.2(3) . . . . ?
C10A C11A C12A C17A 178.8(2) . . . . ?
C6A C11A C12A C17A -4.3(3) . . . . ?
C10A C11A C12A C13A -5.3(3) . . . . ?
C6A C11A C12A C13A 171.6(2) . . . . ?
C17A C12A C13A C14A 0.3(3) . . . . ?
C11A C12A C13A C14A -175.6(2) . . . . ?
C35A O13A C14A C13A 1.2(4) . . . . ?
C35A O13A C14A C15A -178.6(2) . . . . ?
C12A C13A C14A O13A 179.1(2) . . . . ?
C12A C13A C14A C15A -1.2(4) . . . . ?
C36A O14A C15A C16A -8.1(3) . . . . ?
C36A O14A C15A C14A 171.9(2) . . . . ?
O13A C14A C15A O14A 1.9(3) . . . . ?
C13A C14A C15A O14A -177.9(2) . . . . ?
O13A C14A C15A C16A -178.1(2) . . . . ?
C13A C14A C15A C16A 2.1(4) . . . . ?
O14A C15A C16A C17A 177.8(2) . . . . ?
C14A C15A C16A C17A -2.2(4) . . . . ?
C13A C12A C17A C16A -0.3(3) . . . . ?
C11A C12A C17A C16A 175.6(2) . . . . ?
C13A C12A C17A C18A 178.7(2) . . . . ?
C11A C12A C17A C18A -5.5(3) . . . . ?
C15A C16A C17A C12A 1.2(3) . . . . ?
C15A C16A C17A C18A -177.7(2) . . . . ?
C4A C5A C18A C1A 4.2(3) . . . . ?
C6A C5A C18A C1A -179.9(2) . . . . ?
C4A C5A C18A C17A -172.9(2) . . . . ?
C6A C5A C18A C17A 3.0(3) . . . . ?
O1A C1A C18A C5A 178.0(2) . . . . ?
C2A C1A C18A C5A -0.4(4) . . . . ?
O1A C1A C18A C17A -5.1(4) . . . . ?
C2A C1A C18A C17A 176.5(2) . . . . ?
C12A C17A C18A C5A 6.0(3) . . . . ?
C16A C17A C18A C5A -175.1(2) . . . . ?
C12A C17A C18A C1A -170.9(2) . . . . ?
C16A C17A C18A C1A 8.1(4) . . . . ?
C8A C7A C22A C27A -66.4(3) . . . . ?
C6A C7A C22A C27A 120.9(3) . . . . ?
C8A C7A C22A C23A 110.5(3) . . . . ?
C6A C7A C22A C23A -62.3(3) . . . . ?
C27A C22A C23A F1A -178.3(2) . . . . ?
C7A C22A C23A F1A 4.7(3) . . . . ?
C27A C22A C23A C24A 1.5(4) . . . . ?
C7A C22A C23A C24A -175.5(2) . . . . ?
F1A C23A C24A F2A -0.9(4) . . . . ?
C22A C23A C24A F2A 179.3(2) . . . . ?
F1A C23A C24A C25A 179.2(2) . . . . ?
C22A C23A C24A C25A -0.5(4) . . . . ?
F2A C24A C25A F3A -0.7(4) . . . . ?
C23A C24A C25A F3A 179.2(2) . . . . ?
F2A C24A C25A C26A 179.1(2) . . . . ?
C23A C24A C25A C26A -1.1(4) . . . . ?
F3A C25A C26A F4A 2.2(4) . . . . ?
C24A C25A C26A F4A -177.6(2) . . . . ?
F3A C25A C26A C27A -178.6(2) . . . . ?
C24A C25A C26A C27A 1.6(4) . . . . ?
F4A C26A C27A F5A 0.2(4) . . . . ?
C25A C26A C27A F5A -179.0(2) . . . . ?
F4A C26A C27A C22A 178.6(2) . . . . ?
C25A C26A C27A C22A -0.6(4) . . . . ?
C23A C22A C27A F5A 177.5(2) . . . . ?
C7A C22A C27A F5A -5.6(3) . . . . ?
C23A C22A C27A C26A -0.9(4) . . . . ?
C7A C22A C27A C26A 176.0(2) . . . . ?
C7A C8A C28A C33A 112.3(3) . . . . ?
C9A C8A C28A C33A -69.3(3) . . . . ?
C7A C8A C28A C29A -69.1(3) . . . . ?
C9A C8A C28A C29A 109.2(3) . . . . ?
C33A C28A C29A F6A 178.9(2) . . . . ?
C8A C28A C29A F6A 0.3(3) . . . . ?
C33A C28A C29A C30A -1.0(4) . . . . ?
C8A C28A C29A C30A -179.7(2) . . . . ?
F6A C29A C30A F7A 0.7(4) . . . . ?
C28A C29A C30A F7A -179.3(2) . . . . ?
F6A C29A C30A C31A -179.2(2) . . . . ?
C28A C29A C30A C31A 0.7(4) . . . . ?
F7A C30A C31A F8A 0.7(4) . . . . ?
C29A C30A C31A F8A -179.3(2) . . . . ?
F7A C30A C31A C32A -179.8(2) . . . . ?
C29A C30A C31A C32A 0.1(4) . . . . ?
F8A C31A C32A F9A -0.9(4) . . . . ?
C30A C31A C32A F9A 179.7(2) . . . . ?
F8A C31A C32A C33A 178.9(2) . . . . ?
C30A C31A C32A C33A -0.5(4) . . . . ?
F9A C32A C33A F10A 0.3(4) . . . . ?
C31A C32A C33A F10A -179.4(2) . . . . ?
F9A C32A C33A C28A 179.9(2) . . . . ?
C31A C32A C33A C28A 0.2(4) . . . . ?
C29A C28A C33A F10A -179.9(2) . . . . ?
C8A C28A C33A F10A -1.2(3) . . . . ?
C29A C28A C33A C32A 0.5(4) . . . . ?
C8A C28A C33A C32A 179.2(2) . . . . ?
C39 O2S C38 O1S -4.5(9) . . . . ?
C39 O2S C38 C37 175.8(4) . . . . ?
C38 O2S C39 C40 -169.1(4) . . . . ?
 
_refine_diff_density_max    1.606
_refine_diff_density_min   -0.830
_refine_diff_density_rms    0.064

_shelx_res_file
;

    nd1609.res created by SHELXL-2014/7


TITL nd1609_a.res in P2(1)/n
REM Old TITL nd1609 in P21/n #14
REM SHELXT solution in P2(1)/n
REM R1 0.177, Rweak 0.011, Alpha 0.031, Orientation as input
REM Formula found by SHELXT: C78 O10 F20
CELL 0.71073 8.1826 25.6659 31.715 90 95.407 90
ZERR 4 0.0009 0.0028 0.0035 0 0.002 0
LATT 1
SYMM 0.5-X,0.5+Y,0.5-Z
SFAC C H F O
UNIT 304 208 80 48

L.S. 10
PLAN  -20
SIZE 0.078 0.112 0.237
TEMP -153.14
BOND $H
fmap 2
SIMU C19A C19B
ACTA
OMIT 0 0 2
CONF

WGHT    0.065200    9.567901
FVAR       0.05762   0.71127
F1    3    1.346266    0.904607    0.632997    11.00000    0.02468    0.03319 =
         0.03092    0.00619    0.00051   -0.00081
F2    3    1.439326    1.003547    0.622357    11.00000    0.04245    0.04884 =
         0.04018    0.00864   -0.00235   -0.02720
F3    3    1.210464    1.080910    0.613534    11.00000    0.08645    0.01976 =
         0.04761    0.00471    0.00454   -0.02115
F4    3    0.887868    1.057656    0.616628    11.00000    0.07114    0.01805 =
         0.04226    0.00348    0.00941    0.01329
F5    3    0.793900    0.959197    0.628926    11.00000    0.03204    0.02578 =
         0.03342    0.00095    0.00840    0.00603
F6    3    1.133980    0.893424    0.539025    11.00000    0.02865    0.03767 =
         0.02650    0.00497    0.00580   -0.00213
F7    3    1.006155    0.952014    0.473727    11.00000    0.06740    0.04493 =
         0.02786    0.01719    0.01802    0.00224
F8    3    0.677018    0.970443    0.463107    11.00000    0.08084    0.06623 =
         0.03515    0.02653    0.00304    0.03612
F9    3    0.476299    0.927932    0.517467    11.00000    0.03780    0.07677 =
         0.05261    0.01452   -0.00329    0.02577
F10   3    0.604117    0.870076    0.583013    11.00000    0.02704    0.04255 =
         0.03646    0.00718    0.00791    0.00024
O1    4    1.350163    0.834034    0.818052    11.00000    0.03356    0.03892 =
         0.02031    0.00762   -0.00934   -0.00963
O2    4    1.291113    0.939363    0.826939    11.00000    0.05456    0.03950 =
         0.01698   -0.00373   -0.00093   -0.01360
O3    4    1.101038    0.990566    0.768972    11.00000    0.03487    0.02549 =
         0.02156   -0.00831    0.00543   -0.00384
O14   4    1.299698    0.618480    0.716306    11.00000    0.04107    0.02190 =
         0.03358    0.00920    0.00450    0.00796
O15   4    1.429021    0.658188    0.787174    11.00000    0.05155    0.03281 =
         0.04302    0.01714   -0.01519    0.00399
C1    1    1.271055    0.860749    0.784223    11.00000    0.02573    0.03249 =
         0.01737    0.00596    0.00000   -0.00833
C2    1    1.234553    0.912522    0.790713    11.00000    0.02952    0.03165 =
         0.01606   -0.00096    0.00128   -0.01149
C3    1    1.139910    0.940557    0.759393    11.00000    0.02497    0.02470 =
         0.01941   -0.00178    0.00781   -0.00670
C4    1    1.090227    0.916300    0.721819    11.00000    0.02315    0.02210 =
         0.01543    0.00027    0.00370   -0.00342
AFIX  43
H4    2    1.023437    0.934999    0.700857    11.00000   -1.20000
AFIX   0
C5    1    1.134591    0.864849    0.713263    11.00000    0.02063    0.02113 =
         0.01695    0.00162    0.00351   -0.00485
C6    1    1.078393    0.842058    0.672081    11.00000    0.01919    0.01842 =
         0.01687    0.00066    0.00384   -0.00184
C7    1    1.021321    0.872059    0.635907    11.00000    0.02225    0.01434 =
         0.01687    0.00026    0.00389    0.00033
C8    1    0.940389    0.848377    0.600355    11.00000    0.02041    0.01597 =
         0.01833    0.00106    0.00343   -0.00034
C9    1    0.920538    0.793930    0.598609    11.00000    0.02424    0.01748 =
         0.01755    0.00055    0.00258   -0.00131
C10   1    0.993649    0.765035    0.631590    11.00000    0.02605    0.01346 =
         0.02290    0.00049    0.00370   -0.00109
AFIX  43
H10   2    0.987454    0.728131    0.629767    11.00000   -1.20000
AFIX   0
C11   1    1.077188    0.787350    0.667909    11.00000    0.01901    0.01861 =
         0.01686    0.00270    0.00489   -0.00108
C12   1    1.166979    0.755674    0.700492    11.00000    0.01960    0.01942 =
         0.01923    0.00543    0.00489   -0.00096
C13   1    1.186181    0.701900    0.693171    11.00000    0.02506    0.02217 =
         0.02240    0.00545    0.00564    0.00123
AFIX  43
H13   2    1.136342    0.687110    0.667667    11.00000   -1.20000
AFIX   0
C14   1    1.274534    0.670420    0.721748    11.00000    0.02671    0.02032 =
         0.03134    0.00997    0.00882    0.00228
C15   1    1.346794    0.692404    0.759593    11.00000    0.02679    0.03303 =
         0.02911    0.01535   -0.00206    0.00129
C16   1    1.332597    0.744771    0.767022    11.00000    0.03047    0.02942 =
         0.02485    0.00934   -0.00420   -0.00352
AFIX  43
H16   2    1.384326    0.758999    0.792531    11.00000   -1.20000
AFIX   0
C17   1    1.242883    0.778383    0.737727    11.00000    0.02056    0.02560 =
         0.02050    0.00747    0.00318   -0.00239
C18   1    1.220258    0.834146    0.745371    11.00000    0.02077    0.02454 =
         0.01809    0.00270    0.00259   -0.00597
C19   1    1.518986    0.847541    0.828622    11.00000    0.02779    0.05408 =
         0.03421   -0.00161   -0.00331    0.00004
AFIX 137
H19D  2    1.573290    0.851775    0.802583    11.00000   -1.50000
H19E  2    1.573528    0.819808    0.845912    11.00000   -1.50000
H19F  2    1.525591    0.880276    0.844598    11.00000   -1.50000
AFIX   0
C20   1    1.228148    0.923436    0.865137    11.00000    0.04712    0.04037 =
         0.02158    0.00060    0.00381    0.00462
AFIX 137
H20D  2    1.111152    0.915234    0.859518    11.00000   -1.50000
H20E  2    1.242382    0.951640    0.885989    11.00000   -1.50000
H20F  2    1.287470    0.892446    0.876258    11.00000   -1.50000
AFIX   0
C21   1    1.013226    1.020056    0.735833    11.00000    0.02908    0.02533 =
         0.02738   -0.00820    0.00398   -0.00111
AFIX 137
H21D  2    1.072557    1.018816    0.710413    11.00000   -1.50000
H21E  2    1.003704    1.056318    0.744966    11.00000   -1.50000
H21F  2    0.903336    1.005213    0.729445    11.00000   -1.50000
AFIX   0
C22   1    1.066592    0.928307    0.631283    11.00000    0.03037    0.01649 =
         0.01289   -0.00058    0.00200   -0.00251
C23   1    1.230316    0.941745    0.629390    11.00000    0.03012    0.02400 =
         0.01597    0.00186   -0.00021   -0.00458
C24   1    1.279935    0.992641    0.623779    11.00000    0.04027    0.03332 =
         0.01948    0.00306    0.00006   -0.01653
C25   1    1.164502    1.031348    0.619508    11.00000    0.05882    0.01655 =
         0.02238    0.00288    0.00183   -0.01384
C26   1    1.001447    1.019718    0.620605    11.00000    0.05376    0.01530 =
         0.02014    0.00081    0.00241    0.00290
C27   1    0.954082    0.968788    0.626409    11.00000    0.03295    0.02072 =
         0.01607    0.00012    0.00253   -0.00044
C28   1    0.873020    0.880137    0.563354    11.00000    0.02757    0.01357 =
         0.01559   -0.00225    0.00053   -0.00024
C29   1    0.970942    0.901598    0.534369    11.00000    0.03035    0.02068 =
         0.01893   -0.00030    0.00220    0.00022
C30   1    0.906838    0.931549    0.500826    11.00000    0.04861    0.02677 =
         0.02061    0.00528    0.00822    0.00182
C31   1    0.740139    0.940810    0.495270    11.00000    0.05281    0.03539 =
         0.02128    0.00843   -0.00059    0.01549
C32   1    0.638175    0.919666    0.523027    11.00000    0.03272    0.04004 =
         0.03195    0.00220   -0.00303    0.01403
C33   1    0.705825    0.889762    0.556274    11.00000    0.02830    0.02497 =
         0.02225    0.00084    0.00190    0.00157
C34   1    0.833746    0.767804    0.560367    11.00000    0.03678    0.01857 =
         0.02346   -0.00002   -0.00398   -0.00294
AFIX 137
H34D  2    0.718599    0.778843    0.557068    11.00000   -1.50000
H34E  2    0.839350    0.729913    0.564038    11.00000   -1.50000
H34F  2    0.886745    0.777634    0.535081    11.00000   -1.50000
AFIX   0
C35   1    1.228365    0.595751    0.677793    11.00000    0.05168    0.02144 =
         0.03324    0.00700    0.00878    0.00743
AFIX 137
H35D  2    1.271247    0.613229    0.653667    11.00000   -1.50000
H35E  2    1.108813    0.599803    0.675936    11.00000   -1.50000
H35F  2    1.256075    0.558621    0.677341    11.00000   -1.50000
AFIX   0
C36   1    1.481089    0.678438    0.828273    11.00000    0.13177    0.04226 =
         0.05834    0.01976   -0.05850   -0.00010
AFIX 137
H36D  2    1.562014    0.706129    0.825705    11.00000   -1.50000
H36E  2    1.530752    0.650444    0.846180    11.00000   -1.50000
H36F  2    1.386175    0.692615    0.841093    11.00000   -1.50000
AFIX   0
F1A   3    0.899191    0.636686    0.596789    11.00000    0.02281    0.01885 =
         0.03657   -0.00506    0.00543   -0.00351
F2A   3    1.016736    0.551912    0.560023    11.00000    0.02907    0.02903 =
         0.07257   -0.00903    0.02202    0.00462
F3A   3    0.809825    0.474500    0.531358    11.00000    0.05828    0.02078 =
         0.06337   -0.01832    0.02492    0.00234
F4A   3    0.484131    0.481018    0.542114    11.00000    0.04659    0.02084 =
         0.03855   -0.01210    0.00237   -0.01132
F5A   3    0.364963    0.566152    0.577710    11.00000    0.02230    0.02344 =
         0.03378   -0.00319    0.00062   -0.00375
F6A   3    0.686606    0.671925    0.511151    11.00000    0.02508    0.03153 =
         0.02260   -0.00367    0.00528   -0.00328
F7A   3    0.589963    0.639092    0.433124    11.00000    0.06162    0.04607 =
         0.01920   -0.00692    0.01206    0.00474
F8A   3    0.268907    0.617499    0.410244    11.00000    0.07312    0.04887 =
         0.02383   -0.01341   -0.02046    0.00336
F9A   3    0.043016    0.630283    0.467429    11.00000    0.03339    0.03996 =
         0.05819   -0.01036   -0.02247    0.00062
F10A  3    0.139835    0.661844    0.546501    11.00000    0.02343    0.03050 =
         0.04243   -0.00241    0.00603    0.00031
O1A   4    0.928123    0.647025    0.785632    11.00000    0.09518    0.02481 =
         0.02641    0.00292   -0.02992   -0.00652
O2A   4    0.921858    0.542979    0.774374    11.00000    0.02604    0.02001 =
         0.02188    0.00638   -0.00114    0.00247
O3A   4    0.773575    0.499794    0.705413    11.00000    0.03538    0.01265 =
         0.02421    0.00079   -0.00172    0.00235
O13A  4    0.719072    0.879645    0.744194    11.00000    0.03412    0.01502 =
         0.02896   -0.00647   -0.00158   -0.00082
O14A  4    0.893597    0.824699    0.799920    11.00000    0.02791    0.02381 =
         0.02469   -0.00927   -0.00324   -0.00170
C1A   1    0.849030    0.628204    0.748981    11.00000    0.02345    0.02198 =
         0.01941   -0.00011   -0.00056   -0.00249
C2A   1    0.851447    0.575142    0.743066    11.00000    0.01974    0.01896 =
         0.01804    0.00452    0.00285    0.00191
C3A   1    0.770810    0.553052    0.706446    11.00000    0.02253    0.01472 =
         0.02250   -0.00026    0.00490    0.00124
C4A   1    0.692948    0.584898    0.676216    11.00000    0.02293    0.01731 =
         0.01784   -0.00217    0.00154   -0.00007
AFIX  43
H4A   2    0.634923    0.569695    0.651919    11.00000   -1.20000
AFIX   0
C5A   1    0.696609    0.639571    0.680188    11.00000    0.01773    0.01564 =
         0.01744    0.00111    0.00446    0.00063
C6A   1    0.614121    0.672684    0.646723    11.00000    0.01593    0.01419 =
         0.01777   -0.00044    0.00483   -0.00117
C7A   1    0.563798    0.654946    0.604769    11.00000    0.01943    0.01349 =
         0.01728    0.00003    0.00381   -0.00066
C8A   1    0.467695    0.685969    0.576127    11.00000    0.01779    0.01689 =
         0.01529   -0.00073    0.00311   -0.00057
C9A   1    0.419897    0.736287    0.587806    11.00000    0.02092    0.01628 =
         0.01896    0.00099    0.00370    0.00140
C10A  1    0.480373    0.754782    0.626839    11.00000    0.02347    0.01245 =
         0.01984   -0.00208    0.00535    0.00236
AFIX  43
H10A  2    0.452239    0.789220    0.634419    11.00000   -1.20000
AFIX   0
C11A  1    0.581870    0.725337    0.656177    11.00000    0.01842    0.01509 =
         0.01618   -0.00048    0.00495   -0.00068
C12A  1    0.659597    0.749063    0.694717    11.00000    0.01946    0.01526 =
         0.01735   -0.00137    0.00619   -0.00197
C13A  1    0.644860    0.803217    0.701354    11.00000    0.02200    0.01717 =
         0.01888    0.00014    0.00397    0.00033
AFIX  43
H13A  2    0.577591    0.823282    0.681415    11.00000   -1.20000
AFIX   0
C14A  1    0.725089    0.827632    0.735828    11.00000    0.02381    0.01559 =
         0.02228   -0.00364    0.00671   -0.00236
C15A  1    0.822137    0.797853    0.765762    11.00000    0.02099    0.02242 =
         0.02006   -0.00600    0.00375   -0.00412
C16A  1    0.839869    0.745384    0.759562    11.00000    0.02179    0.02042 =
         0.01808   -0.00183    0.00247   -0.00148
AFIX  43
H16A  2    0.908917    0.725949    0.779553    11.00000   -1.20000
AFIX   0
C17A  1    0.758298    0.719197    0.724215    11.00000    0.01910    0.01725 =
         0.01838   -0.00156    0.00507   -0.00109
C18A  1    0.771096    0.662805    0.717930    11.00000    0.01883    0.01659 =
         0.01727   -0.00024    0.00294   -0.00059
PART   1
C19A  1    0.883545    0.631624    0.823762    21.00000    0.09712    0.04419 =
         0.02206   -0.00408    0.00442    0.00123
AFIX 137
H19A  2    0.778599    0.613041    0.819779    21.00000   -1.50000
H19B  2    0.871929    0.662239    0.841702    21.00000   -1.50000
H19C  2    0.967854    0.608448    0.837392    21.00000   -1.50000
AFIX   0
PART   2
C19B  1    1.041501    0.636684    0.811185   -21.00000    0.05251    0.02890 =
         0.04035   -0.00189   -0.02003   -0.00455
AFIX 137
H19G  2    1.020954    0.603236    0.824623   -21.00000   -1.50000
H19H  2    1.053472    0.664045    0.832809   -21.00000   -1.50000
H19I  2    1.142469    0.634345    0.796947   -21.00000   -1.50000
AFIX   0
PART   0
C20A  1    1.084248    0.527500    0.766627    11.00000    0.03175    0.04809 =
         0.04573    0.01970    0.00172    0.01382
AFIX 137
H20A  2    1.081399    0.510649    0.738838    11.00000   -1.50000
H20B  2    1.127273    0.502981    0.788625    11.00000   -1.50000
H20C  2    1.155348    0.558262    0.767108    11.00000   -1.50000
AFIX   0
C21A  1    0.690787    0.474585    0.669658    11.00000    0.04731    0.01633 =
         0.02610   -0.00313   -0.00164    0.00198
AFIX 137
H21A  2    0.748380    0.481747    0.644555    11.00000   -1.50000
H21B  2    0.578026    0.487695    0.665079    11.00000   -1.50000
H21C  2    0.688851    0.436923    0.674676    11.00000   -1.50000
AFIX   0
C22A  1    0.627225    0.605248    0.587255    11.00000    0.02578    0.01289 =
         0.01403   -0.00049    0.00209   -0.00044
C23A  1    0.793756    0.599347    0.582716    11.00000    0.02499    0.01348 =
         0.02203   -0.00131    0.00307   -0.00179
C24A  1    0.856379    0.555965    0.564209    11.00000    0.02948    0.02053 =
         0.03382   -0.00031    0.01119    0.00368
C25A  1    0.751221    0.516440    0.549815    11.00000    0.04285    0.01484 =
         0.02965   -0.00602    0.01136    0.00318
C26A  1    0.586022    0.520231    0.554663    11.00000    0.03725    0.01512 =
         0.02152   -0.00498    0.00089   -0.00518
C27A  1    0.526225    0.564199    0.572944    11.00000    0.02312    0.01935 =
         0.01748   -0.00027    0.00025   -0.00193
C28A  1    0.416574    0.667644    0.532128    11.00000    0.02519    0.01357 =
         0.01718    0.00105   -0.00011    0.00115
C29A  1    0.526532    0.661462    0.501589    11.00000    0.02621    0.01620 =
         0.02058    0.00037   -0.00014    0.00112
C30A  1    0.478332    0.644847    0.461150    11.00000    0.04247    0.02303 =
         0.01903   -0.00205    0.00382    0.00430
C31A  1    0.315919    0.634197    0.449489    11.00000    0.05168    0.02315 =
         0.02016   -0.00619   -0.01256    0.00579
C32A  1    0.202189    0.640330    0.478425    11.00000    0.03026    0.02020 =
         0.03743   -0.00218   -0.01344    0.00040
C33A  1    0.253493    0.656766    0.519086    11.00000    0.02520    0.01746 =
         0.02755    0.00014    0.00050    0.00248
C34A  1    0.318152    0.771263    0.557451    11.00000    0.03037    0.01918 =
         0.02224   -0.00018   -0.00218    0.00554
AFIX 137
H34A  2    0.369279    0.773666    0.530791    11.00000   -1.50000
H34B  2    0.311682    0.806073    0.569882    11.00000   -1.50000
H34C  2    0.207382    0.756775    0.551957    11.00000   -1.50000
AFIX   0
C35A  1    0.618577    0.910744    0.714933    11.00000    0.04229    0.01352 =
         0.03234   -0.00213    0.00032   -0.00151
AFIX 137
H35A  2    0.655056    0.906798    0.686548    11.00000   -1.50000
H35B  2    0.627486    0.947390    0.723520    11.00000   -1.50000
H35C  2    0.504077    0.899429    0.714607    11.00000   -1.50000
AFIX   0
C36A  1    0.974362    0.794512    0.833429    11.00000    0.03418    0.03060 =
         0.02457   -0.00859   -0.00653   -0.00237
AFIX 137
H36A  2    1.066880    0.775795    0.823004    11.00000   -1.50000
H36B  2    0.896809    0.769404    0.843591    11.00000   -1.50000
H36C  2    1.014894    0.817597    0.856718    11.00000   -1.50000
AFIX   0
PART 1 11.0
O1S   4    0.205102    0.750835    0.424548    11.00000    0.34058    0.14927 =
         0.12175    0.04707    0.09857    0.17403
O2S   4   -0.014505    0.798193    0.441600    11.00000    0.14943    0.09674 =
         0.08003    0.01436    0.01457    0.02268
C37   1    0.258417    0.837359    0.443751    11.00000    0.13965    0.08392 =
         0.07236    0.01689    0.00075    0.01924
AFIX 137
H37A  2    0.370315    0.829045    0.437335    11.00000   -1.50000
H37B  2    0.259585    0.847359    0.473599    11.00000   -1.50000
H37C  2    0.215709    0.866293    0.425795    11.00000   -1.50000
AFIX   0
C38   1    0.145127    0.788054    0.434932    11.00000    0.17732    0.12866 =
         0.06177    0.03002    0.03705    0.10455
C39   1   -0.141050    0.754803    0.431203    11.00000    0.23621    0.09240 =
         0.08829    0.04322    0.02350   -0.02578
AFIX  23
H39A  2   -0.129398    0.740503    0.402650    11.00000   -1.20000
H39B  2   -0.123858    0.726177    0.452072    11.00000   -1.20000
AFIX   0
C40   1   -0.310483    0.778173    0.432788    11.00000    0.16216    0.07392 =
         0.05958    0.01903    0.02500    0.04617
AFIX 137
H40A  2   -0.311067    0.800587    0.457790    11.00000   -1.50000
H40B  2   -0.391039    0.750163    0.434419    11.00000   -1.50000
H40C  2   -0.338888    0.798878    0.407181    11.00000   -1.50000

AFIX   0
HKLF 4

REM  nd1609_a.res in P2(1)/n
REM R1 =  0.0545 for   10197 Fo > 4sig(Fo)  and  0.0770 for all   13556 data
REM    998 parameters refined using      6 restraints

END

WGHT      0.0642      9.6517

REM Highest difference peak  1.606,  deepest hole -0.830,  1-sigma level  0.064
Q1    1   0.4203  0.8805  0.4285  11.00000  0.05    1.61
Q2    1   0.0247  0.7522  0.4306  11.00000  0.05    1.11
Q3    1  -0.1537  0.8187  0.4487  11.00000  0.05    0.91
Q4    1   0.5308  0.8205  0.4420  11.00000  0.05    0.65
Q5    1   0.3031  0.7825  0.4335  11.00000  0.05    0.61
Q6    1  -0.1594  0.7252  0.4070  11.00000  0.05    0.57
Q7    1   0.3795  0.8118  0.4389  11.00000  0.05    0.44
Q8    1   0.8331  0.6489  0.7928  11.00000  0.05    0.41
Q9    1   1.2717  0.9072  0.8388  11.00000  0.05    0.38
Q10   1   1.3918  0.9594  0.8456  11.00000  0.05    0.35
Q11   1  -0.3547  0.7971  0.4216  11.00000  0.05    0.34
Q12   1  -0.2067  0.7887  0.4300  11.00000  0.05    0.32
Q13   1   1.1021  0.8544  0.6915  11.00000  0.05    0.30
Q14   1  -0.3923  0.7944  0.4712  11.00000  0.05    0.29
Q15   1  -0.4210  0.8360  0.4762  11.00000  0.05    0.28
Q16   1   0.6010  0.6309  0.5973  11.00000  0.05    0.28
Q17   1   0.6759  0.6579  0.6602  11.00000  0.05    0.28
Q18   1   0.8364  0.9513  0.5055  11.00000  0.05    0.28
Q19   1  -0.5538  0.7715  0.4345  11.00000  0.05    0.27
Q20   1   0.9717  0.6454  0.7873  11.00000  0.05    0.27
;
_shelx_res_checksum   25699

_shelx_hkl_file
;
  -1   0   0    0.01    0.06
  -1   0   0   -0.02    0.05
  -1   0   0    0.06    0.06
  -1   0   0    0.07    0.06
  -1   0   0    0.06    0.04
   1   0   0   -0.04    0.05
   1   0   0    0.02    0.07
   1   0   0   -0.03    0.04
  -2   0   0   70.92    1.33
  -2   0   0   68.04    1.36
  -2   0   0   70.51    1.35
  -2   0   0   69.55    1.34
  -2   0   0   71.90    1.36
   2   0   0   69.17    1.34
   2   0   0   70.49    1.36
  -3   0   0    0.21    0.13
  -3   0   0   -0.01    0.09
  -3   0   0    0.07    0.10
  -3   0   0   -0.06    0.12
  -3   0   0    0.01    0.13
   3   0   0    0.06    0.13
   3   0   0   -0.04    0.10
  -4   0   0    1.28    0.12
  -4   0   0    1.46    0.16
  -4   0   0    1.46    0.18
  -4   0   0    1.53    0.19
   4   0   0    1.34    0.13
   4   0   0    1.40    0.17
  -5   0   0    0.07    0.14
  -5   0   0   -0.15    0.10
  -5   0   0   -0.03    0.17
   5   0   0   -0.17    0.10
   5   0   0   -0.06    0.15
   5   0   0   -0.06    0.11
  -6   0   0   -0.02    0.20
  -6   0   0    0.02    0.17
  -6   0   0   -0.08    0.12
   6   0   0   -0.18    0.11
   6   0   0    0.14    0.18
   6   0   0   -0.26    0.13
  -7   0   0   -0.15    0.18
  -7   0   0   -0.05    0.23
   7   0   0    0.24    0.21
   7   0   0   -0.45    0.14
  -8   0   0    1.83    0.26
  -8   0   0    1.92    0.33
   8   0   0    2.44    0.30
  -9   0   0    0.39    0.31
   9   0   0    0.27    0.30
   9   0   0    0.61    0.27
 -10   0   0    0.07    0.34
  10   0   0   -0.16    0.30
  10   0   0    0.61    0.31
  10   1   0    0.25    0.32
  10   1   0    0.49    0.35
 -10  -1   0   -0.60    0.32
   9   1   0    0.77    0.28
   9   1   0    0.64    0.30
  -9  -1   0    0.66    0.31
   8   1   0    1.44    0.27
  -8  -1   0    0.50    0.25
  -8  -1   0    1.16    0.24
   7   1   0    0.11    0.22
   7   1   0    0.07    0.16
  -7  -1   0    0.25    0.22
  -7  -1   0   -0.01    0.18
   6   1   0    0.34    0.12
   6   1   0    0.13    0.14
   6   1   0    0.31    0.19
  -6  -1   0    0.45    0.13
  -6  -1   0    0.15    0.20
  -6  -1   0    0.10    0.16
   5   1   0    0.72    0.14
   5   1   0    0.64    0.17
   5   1   0    0.68    0.11
  -5  -1   0    0.71    0.15
  -5  -1   0    0.73    0.11
  -5  -1   0    0.64    0.19
   4   1   0    0.01    0.09
   4   1   0    0.05    0.15
   4   1   0    0.23    0.11
  -4  -1   0    0.11    0.15
  -4  -1   0    0.05    0.14
  -4  -1   0    0.22    0.09
  -4  -1   0    0.07    0.12
   3   1   0   24.83    0.57
   3   1   0   24.38    0.54
   3   1   0   24.47    0.51
  -3  -1   0   24.80    0.57
  -3  -1   0   24.49    0.51
  -3  -1   0   24.57    0.58
  -3  -1   0   24.70    0.54
   2   1   0    0.84    0.11
   2   1   0    0.99    0.08
   2   1   0    1.13    0.14
  -2  -1   0    1.01    0.08
  -2  -1   0    1.20    0.11
  -2  -1   0    0.87    0.14
  -2  -1   0    0.98    0.14
   1   1   0  145.30    2.73
   1   1   0  145.82    2.72
   1   1   0  141.62    2.72
   1   1   0  143.91    2.73
   1   1   0  149.34    2.74
  -1  -1   0  146.25    2.73
  -1  -1   0  140.24    2.71
  -1  -1   0  142.73    2.76
  -1  -1   0  145.04    2.73
  -1  -1   0  146.32    2.73
  -1   1   0  141.79    2.72
  -1   1   0  146.66    2.71
  -1   1   0  146.51    2.75
  -1   1   0  144.57    2.75
   1  -1   0  148.81    2.74
   1  -1   0  140.61    2.74
  -2   1   0    0.94    0.09
  -2   1   0    1.09    0.14
  -2   1   0    1.10    0.12
  -2   1   0    0.85    0.09
  -2   1   0    0.91    0.12
   2  -1   0    1.14    0.12
   2  -1   0    0.99    0.09
  -3   1   0   23.89    0.52
  -3   1   0   25.08    0.58
  -3   1   0   24.53    0.55
  -3   1   0   24.53    0.52
  -3   1   0   24.68    0.56
   3  -1   0   24.74    0.56
   3  -1   0   24.22    0.52
  -4   1   0    0.13    0.10
  -4   1   0    0.01    0.16
  -4   1   0    0.01    0.14
  -4   1   0    0.18    0.10
   4  -1   0   -0.12    0.10
   4  -1   0    0.23    0.13
  -5   1   0    0.74    0.16
  -5   1   0    0.57    0.17
  -5   1   0    0.93    0.13
   5  -1   0    0.61    0.13
   5  -1   0    0.86    0.16
  -6   1   0    0.19    0.13
  -6   1   0    0.40    0.19
  -6   1   0    0.26    0.18
   6  -1   0    0.20    0.17
   6  -1   0    0.15    0.14
  -7   1   0    0.07    0.20
  -7   1   0    0.23    0.25
   7  -1   0    0.37    0.21
   7  -1   0    0.07    0.16
  -8   1   0    0.76    0.24
  -8   1   0    0.91    0.30
   8  -1   0    1.09    0.31
   8  -1   0    1.38    0.26
  -9   1   0    0.78    0.33
   9  -1   0    0.84    0.28
   9  -1   0    0.32    0.31
 -10   1   0    1.03    0.38
  10  -1   0   -0.14    0.34
  10  -1   0    0.35    0.28
  10   2   0    0.45    0.35
  10   2   0    0.97    0.34
 -10  -2   0    0.17    0.36
   9   2   0   -0.13    0.27
  -9  -2   0    0.17    0.27
   8   2   0    1.96    0.30
  -8  -2   0    2.18    0.34
   7   2   0    1.78    0.21
   7   2   0    2.00    0.28
  -7  -2   0    1.92    0.29
  -7  -2   0    2.39    0.23
   6   2   0    1.76    0.24
   6   2   0    1.73    0.15
   6   2   0    1.55    0.18
  -6  -2   0    2.08    0.26
  -6  -2   0    1.83    0.19
  -6  -2   0    1.89    0.15
   5   2   0    4.04    0.24
   5   2   0    4.06    0.30
   5   2   0    4.17    0.19
  -5  -2   0    4.04    0.19
  -5  -2   0    4.03    0.23
  -5  -2   0    3.98    0.28
   4   2   0   23.80    0.59
   4   2   0   22.53    0.54
   4   2   0   23.51    0.50
  -4  -2   0   23.22    0.59
  -4  -2   0   23.91    0.54
  -4  -2   0   23.03    0.58
  -4  -2   0   23.78    0.50
   3   2   0   11.75    0.27
   3   2   0   11.26    0.36
   3   2   0   11.47    0.32
  -3  -2   0   11.24    0.27
  -3  -2   0   11.21    0.36
  -3  -2   0   11.41    0.34
  -3  -2   0   11.14    0.30
   2   2   0    0.04    0.11
   2   2   0   -0.07    0.13
   2   2   0   -0.01    0.07
  -2  -2   0    0.11    0.07
  -2  -2   0   -0.03    0.13
  -2  -2   0    0.22    0.12
  -2  -2   0   -0.02    0.08
   1   2   0    0.54    0.04
   1   2   0    0.44    0.08
   1   2   0    0.47    0.08
   1   2   0    0.43    0.05
  -1  -2   0    0.60    0.05
  -1  -2   0    0.53    0.04
  -1  -2   0    0.53    0.09
  -1  -2   0    0.50    0.08
   0   2   0    4.00    0.10
   0   2   0    4.71    0.11
   0   2   0    4.43    0.10
   0   2   0    4.91    0.12
   0   2   0    4.83    0.11
   0  -2   0    4.76    0.11
   0  -2   0    4.77    0.11
   0  -2   0    4.73    0.11
   0  -2   0    4.99    0.12
  -1   2   0    0.57    0.07
  -1   2   0    0.58    0.06
  -1   2   0    0.57    0.05
  -1   2   0    0.59    0.09
  -1   2   0    0.50    0.06
  -1   2   0    0.55    0.09
   1  -2   0    0.58    0.09
   1  -2   0    0.48    0.06
   1  -2   0    0.53    0.06
   1  -2   0    0.61    0.06
  -2   2   0    0.01    0.09
  -2   2   0    0.04    0.12
  -2   2   0    0.11    0.07
  -2   2   0    0.12    0.11
  -2   2   0    0.13    0.10
   2  -2   0    0.00    0.10
   2  -2   0    0.00    0.13
  -3   2   0   11.40    0.34
  -3   2   0   10.97    0.33
  -3   2   0   11.15    0.28
  -3   2   0   11.42    0.32
  -3   2   0   11.32    0.29
   3  -2   0   11.56    0.32
   3  -2   0   11.29    0.28
  -4   2   0   22.72    0.57
  -4   2   0   22.96    0.56
  -4   2   0   23.46    0.51
  -4   2   0   23.24    0.52
   4  -2   0   23.69    0.56
   4  -2   0   22.54    0.51
  -5   2   0    4.32    0.22
  -5   2   0    3.92    0.31
  -5   2   0    3.74    0.28
  -5   2   0    3.98    0.21
   5  -2   0    4.24    0.22
   5  -2   0    3.97    0.25
  -6   2   0    2.13    0.26
  -6   2   0    1.68    0.16
  -6   2   0    1.53    0.22
   6  -2   0    1.82    0.17
   6  -2   0    1.49    0.25
   6  -2   0    1.85    0.21
  -7   2   0    2.17    0.26
  -7   2   0    1.85    0.27
  -7   2   0    2.00    0.22
   7  -2   0    2.60    0.26
   7  -2   0    2.42    0.20
   7  -2   0    2.40    0.21
   7  -2   0    1.82    0.29
  -8   2   0    1.77    0.31
  -8   2   0    1.71    0.27
   8  -2   0    2.20    0.28
   8  -2   0    1.46    0.32
  -9   2   0   -0.49    0.30
  -9   2   0    0.22    0.29
   9  -2   0    0.73    0.26
   9  -2   0    0.15    0.30
 -10   2   0    0.77    0.37
  10  -2   0    0.57    0.36
  10   3   0    0.46    0.32
  10   3   0    0.86    0.35
 -10  -3   0    0.07    0.33
   9   3   0    1.08    0.32
  -9  -3   0    0.83    0.32
   8   3   0    0.10    0.21
   8   3   0   -0.06    0.27
  -8  -3   0    0.16    0.24
   7   3   0    8.32    0.38
   7   3   0    8.82    0.46
  -7  -3   0    9.09    0.48
  -7  -3   0    8.20    0.35
   6   3   0    0.12    0.20
   6   3   0    0.03    0.10
   6   3   0    0.15    0.15
  -6  -3   0    0.18    0.14
  -6  -3   0    0.06    0.21
   5   3   0    0.23    0.17
   5   3   0   -0.04    0.12
   5   3   0   -0.05    0.09
  -5  -3   0   -0.09    0.16
  -5  -3   0   -0.06    0.12
   4   3   0   17.52    0.50
   4   3   0   17.08    0.39
   4   3   0   18.35    0.45
  -4  -3   0   18.09    0.50
  -4  -3   0   17.73    0.50
  -4  -3   0   17.53    0.42
   3   3   0    0.91    0.17
   3   3   0    0.75    0.09
   3   3   0    0.89    0.13
  -3  -3   0    0.72    0.17
  -3  -3   0    0.83    0.11
  -3  -3   0    0.71    0.14
   2   3   0   18.77    0.39
   2   3   0   19.40    0.44
   2   3   0   19.13    0.46
  -2  -3   0   19.42    0.46
  -2  -3   0   19.19    0.47
  -2  -3   0   19.08    0.39
   1   3   0   37.69    0.77
   1   3   0   39.12    0.74
   1   3   0   39.16    0.76
  -1  -3   0   37.15    0.76
  -1  -3   0   39.32    0.77
   0   3   0    0.05    0.05
   0   3   0    0.00    0.06
   0   3   0    0.00    0.06
   0   3   0   -0.07    0.05
   0   3   0    0.00    0.04
   0  -3   0   -0.02    0.06
   0  -3   0    0.07    0.05
   0  -3   0   -0.06    0.05
  -1   3   0   39.39    0.75
  -1   3   0   39.18    0.76
  -1   3   0   38.23    0.77
   1  -3   0   39.14    0.77
   1  -3   0   37.65    0.73
   1  -3   0   39.29    0.73
  -2   3   0   18.67    0.45
  -2   3   0   18.96    0.41
  -2   3   0   18.35    0.42
  -2   3   0   18.82    0.39
  -2   3   0   19.01    0.45
   2  -3   0   19.43    0.46
   2  -3   0   19.58    0.41
  -3   3   0    0.64    0.09
  -3   3   0    0.64    0.14
  -3   3   0    0.69    0.15
  -3   3   0    0.84    0.12
   3  -3   0    0.80    0.16
   3  -3   0    0.69    0.12
  -4   3   0   17.49    0.49
  -4   3   0   17.44    0.47
  -4   3   0   17.63    0.41
  -4   3   0   17.72    0.43
   4  -3   0   17.31    0.44
   4  -3   0   17.32    0.41
   4  -3   0   17.60    0.50
  -5   3   0    0.01    0.12
  -5   3   0    0.01    0.11
  -5   3   0    0.21    0.17
  -5   3   0   -0.14    0.17
   5  -3   0   -0.13    0.13
   5  -3   0   -0.06    0.11
   5  -3   0    0.21    0.19
  -6   3   0   -0.05    0.18
  -6   3   0    0.03    0.21
  -6   3   0    0.17    0.14
   6  -3   0    0.17    0.13
   6  -3   0    0.12    0.16
   6  -3   0    0.18    0.19
  -7   3   0    8.20    0.43
  -7   3   0    9.09    0.48
  -7   3   0    7.99    0.33
   7  -3   0    8.44    0.48
   7  -3   0    8.51    0.42
  -8   3   0   -0.30    0.26
  -8   3   0    0.18    0.24
   8  -3   0   -0.04    0.22
   8  -3   0   -0.07    0.26
  -9   3   0    0.87    0.32
  -9   3   0    0.47    0.28
   9  -3   0    0.92    0.26
   9  -3   0    0.96    0.31
 -10   3   0    0.06    0.35
  10  -3   0    0.73    0.36
  10   4   0    0.57    0.34
 -10  -4   0    0.14    0.36
   9   4   0    1.10    0.33
  -9  -4   0    1.15    0.34
   8   4   0    1.71    0.32
   8   4   0    1.69    0.24
  -8  -4   0    1.75    0.32
   7   4   0   -0.15    0.24
   7   4   0   -0.04    0.17
  -7  -4   0   -0.06    0.24
  -7  -4   0    0.13    0.17
   6   4   0    8.02    0.34
   6   4   0    6.91    0.24
   6   4   0    8.22    0.42
  -6  -4   0    7.28    0.38
  -6  -4   0    7.57    0.30
   5   4   0    0.39    0.10
   5   4   0    0.36    0.15
   5   4   0    0.32    0.19
  -5  -4   0    0.25    0.19
  -5  -4   0    0.52    0.13
   4   4   0   10.46    0.34
   4   4   0   10.15    0.26
   4   4   0    9.69    0.36
  -4  -4   0   11.20    0.38
  -4  -4   0   10.31    0.29
  -4  -4   0   10.10    0.38
   3   4   0   29.29    0.68
   3   4   0   29.71    0.65
   3   4   0   29.04    0.59
  -3  -4   0   29.48    0.67
  -3  -4   0   29.47    0.60
  -3  -4   0   29.91    0.67
   2   4   0    9.71    0.31
   2   4   0    9.21    0.23
   2   4   0    9.69    0.28
   2   4   0    9.62    0.23
  -2  -4   0    9.67    0.21
  -2  -4   0    9.46    0.31
  -2  -4   0    9.16    0.30
   1   4   0    7.45    0.22
   1   4   0    7.18    0.19
   1   4   0    7.06    0.23
  -1  -4   0    7.04    0.23
  -1  -4   0    7.58    0.24
   0   4   0   72.36    1.35
   0   4   0   71.60    1.36
   0   4   0   70.50    1.36
   0  -4   0   71.66    1.35
   0  -4   0   71.62    1.37
  -1   4   0    7.38    0.19
  -1   4   0    7.54    0.23
  -1   4   0    7.46    0.24
   1  -4   0    7.02    0.22
  -2   4   0    9.41    0.23
  -2   4   0    9.46    0.31
  -2   4   0    9.88    0.30
  -2   4   0    9.32    0.27
   2  -4   0    9.61    0.31
   2  -4   0    9.30    0.24
  -3   4   0   29.17    0.66
  -3   4   0   29.05    0.63
  -3   4   0   29.86    0.67
  -3   4   0   28.70    0.60
   3  -4   0   30.26    0.68
   3  -4   0   30.09    0.63
  -4   4   0   10.23    0.37
  -4   4   0   10.30    0.31
  -4   4   0   10.35    0.36
  -4   4   0   10.22    0.28
   4  -4   0   10.72    0.39
   4  -4   0    9.74    0.31
   4  -4   0   10.29    0.28
  -5   4   0    0.43    0.13
  -5   4   0    0.42    0.19
  -5   4   0    0.38    0.17
  -5   4   0    0.18    0.11
   5  -4   0    0.33    0.11
   5  -4   0    0.02    0.13
   5  -4   0    0.01    0.18
  -6   4   0    6.68    0.39
  -6   4   0    7.62    0.28
  -6   4   0    7.78    0.30
  -6   4   0    8.28    0.38
   6  -4   0    7.45    0.28
   6  -4   0    7.12    0.34
   6  -4   0    6.96    0.42
  -7   4   0    0.17    0.22
  -7   4   0   -0.05    0.21
  -7   4   0    0.00    0.16
   7  -4   0    0.07    0.24
   7  -4   0    0.16    0.20
  -8   4   0    1.74    0.29
  -8   4   0    1.75    0.32
   8  -4   0    1.75    0.26
   8  -4   0    1.75    0.32
  -9   4   0    1.53    0.35
  -9   4   0    1.23    0.30
   9  -4   0    1.03    0.34
   9  -4   0    1.28    0.34
 -10   4   0   -0.27    0.33
  10  -4   0   -0.07    0.34
  10   5   0    0.91    0.36
 -10  -5   0    0.21    0.34
   9   5   0   -0.02    0.31
  -9  -5   0    0.16    0.32
   8   5   0    1.02    0.31
   8   5   0    1.21    0.23
  -8  -5   0    0.64    0.31
   7   5   0    0.11    0.22
   7   5   0    0.22    0.20
  -7  -5   0    0.36    0.23
   6   5   0    2.11    0.27
   6   5   0    2.39    0.17
   6   5   0    2.66    0.23
  -6  -5   0    2.53    0.19
  -6  -5   0    2.73    0.28
   5   5   0    0.22    0.19
   5   5   0    0.23    0.14
   5   5   0    0.08    0.09
  -5  -5   0    0.22    0.11
  -5  -5   0    0.03    0.17
   4   5   0    5.90    0.32
   4   5   0    5.76    0.27
   4   5   0    5.47    0.19
  -4  -5   0    5.88    0.32
  -4  -5   0    5.63    0.20
  -4  -5   0    6.51    0.29
   3   5   0   34.67    0.70
   3   5   0   33.95    0.75
  -3  -5   0   34.76    0.69
  -3  -5   0   35.61    0.78
  -3  -5   0   35.40    0.79
   2   5   0    3.64    0.15
   2   5   0    3.50    0.24
   2   5   0    3.54    0.22
  -2  -5   0    3.45    0.23
  -2  -5   0    3.21    0.21
  -2  -5   0    3.47    0.10
   1   5   0  117.27    2.20
   1   5   0  118.54    2.22
   1   5   0  114.98    2.18
   1   5   0  118.38    2.23
  -1  -5   0  117.69    2.18
  -1  -5   0  117.52    2.18
  -1  -5   0  116.20    2.22
  -1  -5   0  113.54    2.22
   0   5   0   -0.03    0.09
   0   5   0    0.00    0.08
   0   5   0    0.02    0.07
   0   5   0    0.05    0.10
   0  -5   0    0.08    0.08
   0  -5   0    0.30    0.11
  -1   5   0  118.60    2.24
  -1   5   0  120.43    2.26
  -1   5   0  118.02    2.25
   1  -5   0  117.34    2.26
  -2   5   0    3.35    0.20
  -2   5   0    3.67    0.15
  -2   5   0    3.33    0.24
   2  -5   0    3.42    0.23
   2  -5   0    3.52    0.14
  -3   5   0   35.45    0.77
  -3   5   0   35.97    0.74
  -3   5   0   34.92    0.78
  -3   5   0   34.57    0.70
   3  -5   0   34.66    0.72
   3  -5   0   34.38    0.77
  -4   5   0    5.72    0.20
  -4   5   0    5.67    0.30
  -4   5   0    5.33    0.30
  -4   5   0    5.80    0.24
   4  -5   0    5.85    0.31
   4  -5   0    5.43    0.23
  -5   5   0   -0.25    0.17
  -5   5   0    0.22    0.10
  -5   5   0    0.28    0.13
  -5   5   0    0.33    0.17
   5  -5   0   -0.01    0.13
   5  -5   0    0.19    0.19
   5  -5   0    0.10    0.11
  -6   5   0    2.83    0.27
  -6   5   0    2.40    0.20
  -6   5   0    2.60    0.18
  -6   5   0    2.56    0.27
   6  -5   0    2.47    0.22
   6  -5   0    2.33    0.17
   6  -5   0    2.46    0.29
  -7   5   0    0.10    0.22
  -7   5   0   -0.10    0.24
  -7   5   0    0.18    0.17
   7  -5   0   -0.11    0.26
   7  -5   0   -0.42    0.18
  -8   5   0    0.55    0.27
  -8   5   0    0.93    0.30
   8  -5   0    0.60    0.30
   8  -5   0    0.28    0.22
  -9   5   0    0.29    0.28
  -9   5   0   -0.38    0.30
   9  -5   0   -0.35    0.30
 -10   5   0    0.48    0.35
  10  -5   0    0.10    0.35
  10   6   0    0.90    0.38
 -10  -6   0    0.14    0.35
   9   6   0   -0.38    0.31
  -9  -6   0    0.28    0.32
   8   6   0    1.15    0.31
   8   6   0    1.04    0.24
  -8  -6   0    0.81    0.31
   7   6   0    2.99    0.33
   7   6   0    4.74    0.36
  -7  -6   0    3.63    0.36
   6   6   0   18.01    0.60
   6   6   0   18.04    0.52
  -6  -6   0   18.13    0.59
  -6  -6   0   17.70    0.45
   5   6   0   24.58    0.53
   5   6   0   25.78    0.63
   5   6   0   24.22    0.67
  -5  -6   0   25.37    0.66
  -5  -6   0   25.07    0.55
   4   6   0    7.65    0.31
   4   6   0    8.41    0.36
   4   6   0    7.83    0.23
  -4  -6   0    8.00    0.34
  -4  -6   0    8.14    0.22
  -4  -6   0    8.16    0.36
   3   6   0   16.73    0.37
   3   6   0   16.10    0.44
   3   6   0   16.31    0.47
  -3  -6   0   16.51    0.34
  -3  -6   0   16.22    0.45
  -3  -6   0   16.63    0.46
   2   6   0   47.86    0.99
   2   6   0   48.13    0.94
   2   6   0   48.70    0.99
  -2  -6   0   48.15    0.99
  -2  -6   0   46.77    0.98
   1   6   0    3.06    0.19
   1   6   0    2.69    0.17
   1   6   0    2.78    0.21
   1   6   0    2.93    0.11
  -1  -6   0    2.73    0.20
  -1  -6   0    3.12    0.21
  -1  -6   0    2.65    0.12
   0   6   0   12.43    0.31
   0   6   0   11.73    0.29
   0   6   0   12.05    0.28
   0   6   0   11.75    0.31
   0  -6   0   12.06    0.28
   0  -6   0   12.02    0.32
  -1   6   0    2.78    0.18
  -1   6   0    3.11    0.15
  -1   6   0    2.85    0.18
   1  -6   0    3.03    0.19
  -2   6   0   47.79    0.97
  -2   6   0   47.44    0.94
  -2   6   0   47.68    0.99
   2  -6   0   47.76    0.91
   2  -6   0   48.53    0.99
  -3   6   0   16.33    0.45
  -3   6   0   17.14    0.47
  -3   6   0   16.52    0.37
  -3   6   0   16.67    0.42
   3  -6   0   16.64    0.38
   3  -6   0   16.89    0.46
  -4   6   0    7.73    0.32
  -4   6   0    7.97    0.23
  -4   6   0    8.43    0.30
  -4   6   0    7.73    0.34
   4  -6   0    8.20    0.32
   4  -6   0    7.68    0.26
  -5   6   0   26.23    0.68
  -5   6   0   25.37    0.57
  -5   6   0   26.05    0.62
  -5   6   0   24.82    0.67
   5  -6   0   25.66    0.68
   5  -6   0   24.82    0.60
   5  -6   0   26.37    0.57
  -6   6   0   17.94    0.58
  -6   6   0   16.95    0.56
  -6   6   0   17.59    0.49
  -6   6   0   17.86    0.45
   6  -6   0   18.03    0.59
   6  -6   0   16.91    0.50
   6  -6   0   18.18    0.45
  -7   6   0    4.28    0.31
  -7   6   0    4.36    0.34
  -7   6   0    3.71    0.33
   7  -6   0    3.26    0.27
   7  -6   0    3.84    0.32
  -8   6   0    0.90    0.31
  -8   6   0    0.72    0.28
   8  -6   0    0.81    0.31
   8  -6   0    0.50    0.24
  -9   6   0   -0.18    0.28
  -9   6   0    0.05    0.30
   9  -6   0   -0.07    0.30
 -10   6   0    0.67    0.34
 -10   6   0   -0.07    0.34
  10  -6   0    0.63    0.36
   9   7   0    0.18    0.34
  -9  -7   0    0.24    0.32
   8   7   0    1.48    0.25
   8   7   0    1.32    0.33
  -8  -7   0    0.69    0.32
   7   7   0    3.82    0.34
   7   7   0    3.32    0.29
  -7  -7   0    2.81    0.31
   6   7   0    0.18    0.18
   6   7   0    0.00    0.23
  -6  -7   0   -0.01    0.22
   5   7   0    4.29    0.28
   5   7   0    4.38    0.18
   5   7   0    4.45    0.31
  -5  -7   0    4.71    0.32
  -5  -7   0    4.45    0.19
   4   7   0    3.67    0.27
   4   7   0    4.23    0.17
   4   7   0    3.86    0.24
  -4  -7   0    3.65    0.26
  -4  -7   0    3.97    0.29
  -4  -7   0    3.93    0.15
   3   7   0    3.36    0.24
   3   7   0    3.70    0.28
   3   7   0    3.65    0.16
  -3  -7   0    3.51    0.25
  -3  -7   0    3.40    0.23
   2   7   0    0.23    0.09
   2   7   0   -0.11    0.14
   2   7   0    0.14    0.13
  -2  -7   0   -0.01    0.14
  -2  -7   0   -0.07    0.15
   1   7   0   18.84    0.42
   1   7   0   18.01    0.43
   1   7   0   17.71    0.44
   1   7   0   18.37    0.38
  -1  -7   0   18.36    0.44
  -1  -7   0   18.97    0.44
   0   7   0   -0.04    0.12
   0   7   0    0.09    0.11
   0   7   0    0.03    0.08
   0   7   0    0.01    0.10
   0  -7   0   -0.09    0.12
   0  -7   0   -0.09    0.08
  -1   7   0   17.95    0.44
  -1   7   0   18.14    0.44
  -1   7   0   18.29    0.41
   1  -7   0   18.06    0.45
  -2   7   0    0.01    0.15
  -2   7   0    0.10    0.13
  -2   7   0    0.17    0.09
   2  -7   0    0.12    0.15
  -3   7   0    3.86    0.23
  -3   7   0    3.28    0.16
  -3   7   0    3.22    0.22
   3  -7   0    3.03    0.23
   3  -7   0    3.49    0.16
  -4   7   0    4.01    0.17
  -4   7   0    3.88    0.24
  -4   7   0    3.90    0.26
  -4   7   0    3.92    0.29
   4  -7   0    4.11    0.26
   4  -7   0    3.86    0.20
  -5   7   0    4.41    0.20
  -5   7   0    4.28    0.25
  -5   7   0    4.80    0.30
  -5   7   0    4.83    0.32
   5  -7   0    4.91    0.24
   5  -7   0    4.97    0.33
  -6   7   0   -0.08    0.20
  -6   7   0   -0.08    0.12
  -6   7   0    0.06    0.16
  -6   7   0    0.38    0.21
   6  -7   0   -0.40    0.14
   6  -7   0    0.11    0.12
   6  -7   0    0.09    0.21
  -7   7   0    3.53    0.32
  -7   7   0    3.16    0.33
  -7   7   0    3.13    0.25
   7  -7   0    3.07    0.26
   7  -7   0    4.03    0.35
  -8   7   0    1.42    0.30
  -8   7   0    0.99    0.30
   8  -7   0    1.41    0.32
  -9   7   0    0.17    0.30
  -9   7   0   -0.39    0.30
   9  -7   0   -0.50    0.31
   9   8   0   -0.34    0.33
  -9  -8   0    0.06    0.32
   8   8   0    1.36    0.27
   8   8   0    1.09    0.33
  -8  -8   0    1.06    0.32
   7   8   0    0.82    0.24
   7   8   0    0.59    0.26
  -7  -8   0    0.98    0.27
   6   8   0    0.20    0.25
   6   8   0    0.24    0.20
  -6  -8   0    0.51    0.23
   5   8   0   -0.13    0.15
   5   8   0   -0.33    0.20
   5   8   0    0.11    0.09
  -5  -8   0    0.19    0.17
  -5  -8   0   -0.01    0.08
   4   8   0    0.05    0.17
   4   8   0    0.38    0.09
   4   8   0    0.44    0.17
  -4  -8   0    0.17    0.06
  -4  -8   0   -0.02    0.17
  -4  -8   0    0.13    0.16
   3   8   0    0.31    0.16
   3   8   0    0.18    0.09
   3   8   0    0.12    0.17
  -3  -8   0    0.19    0.16
  -3  -8   0    0.00    0.14
   2   8   0    1.68    0.18
   2   8   0    1.37    0.16
   2   8   0    1.58    0.12
  -2  -8   0    1.59    0.16
  -2  -8   0    1.83    0.18
   1   8   0    6.20    0.18
   1   8   0    5.92    0.22
   1   8   0    6.15    0.25
   1   8   0    6.17    0.27
  -1  -8   0    5.77    0.26
  -1  -8   0    6.01    0.24
   0   8   0   17.02    0.40
   0   8   0   17.33    0.38
   0   8   0   17.43    0.43
   0   8   0   17.11    0.42
   0  -8   0   17.46    0.38
   0  -8   0   17.35    0.44
  -1   8   0    6.29    0.26
  -1   8   0    5.92    0.25
  -1   8   0    6.16    0.22
   1  -8   0    6.58    0.25
  -2   8   0    1.76    0.17
  -2   8   0    1.46    0.18
  -2   8   0    1.58    0.12
   2  -8   0    2.06    0.19
  -3   8   0    0.03    0.09
  -3   8   0    0.16    0.14
  -3   8   0    0.01    0.15
   3  -8   0   -0.01    0.07
   3  -8   0    0.39    0.16
  -4   8   0    0.03    0.09
  -4   8   0    0.02    0.17
  -4   8   0    0.22    0.14
   4  -8   0    0.17    0.16
   4  -8   0   -0.02    0.10
  -5   8   0   -0.19    0.17
  -5   8   0   -0.03    0.10
  -5   8   0    0.28    0.16
  -5   8   0   -0.15    0.16
   5  -8   0   -0.08    0.19
   5  -8   0    0.05    0.12
  -6   8   0    0.72    0.23
  -6   8   0    0.30    0.17
  -6   8   0    0.64    0.23
   6  -8   0    0.35    0.18
   6  -8   0    0.77    0.23
   6  -8   0    0.36    0.16
  -7   8   0    0.41    0.19
  -7   8   0    0.70    0.25
  -7   8   0    0.70    0.27
   7  -8   0    0.34    0.25
   7  -8   0    0.83    0.27
  -8   8   0    0.56    0.29
  -8   8   0    1.02    0.29
   8  -8   0    1.29    0.32
  -9   8   0    0.39    0.31
  -9   8   0   -0.42    0.30
   9  -8   0   -0.05    0.32
   9   9   0   -0.30    0.34
   9   9   0   -0.08    0.37
  -9  -9   0    0.37    0.34
   8   9   0    2.06    0.29
   8   9   0    1.99    0.36
  -8  -9   0    2.48    0.36
   7   9   0   11.48    0.57
   7   9   0   10.69    0.47
  -7  -9   0   10.04    0.53
   6   9   0   -0.08    0.19
   6   9   0    0.08    0.22
  -6  -9   0    0.16    0.23
   5   9   0    0.38    0.10
   5   9   0    0.35    0.18
   5   9   0    0.62    0.20
  -5  -9   0    0.48    0.19
   4   9   0    1.56    0.12
   4   9   0    1.53    0.20
   4   9   0    1.51    0.22
  -4  -9   0    1.29    0.20
  -4  -9   0    1.78    0.20
   3   9   0    3.11    0.25
   3   9   0    3.25    0.26
   3   9   0    3.44    0.17
  -3  -9   0    3.13    0.24
  -3  -9   0    3.44    0.28
   2   9   0    0.37    0.11
   2   9   0    0.11    0.15
   2   9   0    0.19    0.14
  -2  -9   0    0.44    0.15
  -2  -9   0    0.26    0.16
   1   9   0    4.75    0.23
   1   9   0    4.73    0.22
   1   9   0    4.45    0.16
   1   9   0    4.38    0.22
  -1  -9   0    4.49    0.23
  -1  -9   0    4.53    0.25
   0   9   0    0.01    0.12
   0   9   0    0.11    0.10
   0   9   0   -0.14    0.13
   0   9   0    0.07    0.09
   0  -9   0    0.05    0.12
  -1   9   0    4.52    0.12
  -1   9   0    4.58    0.23
  -1   9   0    4.56    0.12
  -1   9   0    4.67    0.24
  -1   9   0    4.79    0.22
   1  -9   0    4.80    0.23
  -2   9   0    0.24    0.13
  -2   9   0    0.20    0.10
  -2   9   0    0.18    0.14
   2  -9   0    0.24    0.14
  -3   9   0    3.38    0.17
  -3   9   0    3.22    0.24
  -3   9   0    3.29    0.24
   3  -9   0    3.61    0.24
   3  -9   0    2.86    0.12
  -4   9   0    1.55    0.18
  -4   9   0    1.76    0.13
  -4   9   0    1.40    0.20
   4  -9   0    1.63    0.12
   4  -9   0    1.82    0.21
  -5   9   0    0.26    0.18
  -5   9   0    0.55    0.17
  -5   9   0    0.46    0.11
   5  -9   0    0.28    0.12
   5  -9   0    0.36    0.20
  -6   9   0    0.33    0.18
  -6   9   0    0.47    0.23
  -6   9   0    0.13    0.23
   6  -9   0   -0.23    0.14
   6  -9   0    0.58    0.24
  -7   9   0   10.67    0.51
  -7   9   0   10.38    0.51
  -7   9   0   10.17    0.41
   7  -9   0   10.78    0.49
  -8   9   0    1.91    0.34
  -8   9   0    2.76    0.36
   8  -9   0    1.38    0.30
  -9   9   0    0.33    0.32
  -9   9   0    0.15    0.28
   9  -9   0   -0.24    0.31
   9  10   0    1.93    0.41
   9  10   0    1.66    0.31
  -9 -10   0    1.40    0.38
   8  10   0    0.15    0.26
   8  10   0   -0.34    0.27
  -8 -10   0    0.14    0.30
   7  10   0   13.96    0.63
   7  10   0   13.89    0.54
  -7 -10   0   14.13    0.59
   6  10   0    0.02    0.20
   6  10   0    0.40    0.26
  -6 -10   0    0.13    0.22
   5  10   0    0.24    0.18
   5  10   0    0.09    0.10
   5  10   0   -0.03    0.19
  -5 -10   0   -0.07    0.20
   4  10   0   -0.10    0.18
   4  10   0   -0.15    0.16
   4  10   0    0.06    0.10
  -4 -10   0    0.06    0.18
  -4 -10   0    0.05    0.17
   3  10   0   16.76    0.50
   3  10   0   17.81    0.48
   3  10   0   17.59    0.42
  -3 -10   0   17.46    0.50
  -3 -10   0   17.52    0.51
   2  10   0   16.00    0.40
   2  10   0   16.40    0.44
   2  10   0   16.22    0.45
  -2 -10   0   16.33    0.32
  -2 -10   0   16.82    0.45
  -2 -10   0   15.89    0.45
   1  10   0   29.30    0.60
   1  10   0   29.55    0.67
   1  10   0   28.84    0.64
   1  10   0   29.23    0.64
  -1 -10   0   28.95    0.67
  -1 -10   0   29.10    0.64
   0  10   0  191.75    3.65
   0  10   0  191.71    3.65
   0  10   0  195.70    3.62
   0  10   0  190.31    3.63
   0 -10   0  191.29    3.66
  -1  10   0   29.45    0.66
  -1  10   0   29.88    0.64
  -1  10   0   29.53    0.57
  -1  10   0   28.78    0.66
   1 -10   0   29.64    0.67
  -2  10   0   15.72    0.44
  -2  10   0   16.89    0.45
  -2  10   0   16.64    0.40
   2 -10   0   16.58    0.45
  -3  10   0   17.71    0.42
  -3  10   0   17.24    0.48
  -3  10   0   17.95    0.51
   3 -10   0   17.73    0.50
  -4  10   0   -0.20    0.14
  -4  10   0    0.02    0.19
  -4  10   0   -0.08    0.09
   4 -10   0   -0.28    0.08
   4 -10   0    0.06    0.16
  -5  10   0   -0.01    0.18
  -5  10   0    0.16    0.10
  -5  10   0    0.14    0.17
   5 -10   0    0.11    0.11
   5 -10   0    0.24    0.19
  -6  10   0    0.45    0.19
  -6  10   0    0.64    0.25
   6 -10   0   -0.07    0.24
  -7  10   0   13.66    0.58
  -7  10   0   13.08    0.47
   7 -10   0   14.06    0.59
  -8  10   0    0.14    0.31
  -8  10   0    0.18    0.29
   8 -10   0    0.23    0.30
  -9  10   0    2.42    0.38
   9 -10   0    1.52    0.38
   9  11   0    1.31    0.31
   9  11   0    0.75    0.37
  -9 -11   0    0.61    0.36
   8  11   0    0.75    0.35
   8  11   0    0.81    0.28
  -8 -11   0    0.31    0.32
   7  11   0    0.49    0.25
   7  11   0    0.81    0.31
  -7 -11   0    0.36    0.29
   6  11   0    3.33    0.29
   6  11   0    2.47    0.33
  -6 -11   0    3.65    0.33
   5  11   0    1.20    0.23
   5  11   0    1.21    0.13
   5  11   0    0.91    0.24
  -5 -11   0    1.15    0.24
   4  11   0    1.14    0.20
   4  11   0    0.91    0.19
   4  11   0    1.26    0.13
  -4 -11   0    0.95    0.19
   3  11   0    0.40    0.17
   3  11   0    0.72    0.12
   3  11   0    0.71    0.18
  -3 -11   0    0.50    0.17
  -3 -11   0    0.64    0.18
   2  11   0    7.80    0.27
   2  11   0    8.00    0.32
   2  11   0    7.72    0.31
  -2 -11   0    7.84    0.31
  -2 -11   0    8.08    0.19
  -2 -11   0    8.23    0.31
   1  11   0    5.06    0.23
   1  11   0    4.90    0.27
   1  11   0    4.87    0.18
   1  11   0    4.85    0.24
  -1 -11   0    4.97    0.24
  -1 -11   0    4.50    0.24
   0  11   0    0.39    0.15
   0  11   0    0.21    0.12
   0  11   0    0.21    0.14
   0 -11   0    0.17    0.15
  -1  11   0    5.13    0.26
  -1  11   0    5.22    0.25
  -1  11   0    4.93    0.24
  -1  11   0    4.94    0.15
   1 -11   0    5.14    0.28
  -2  11   0    8.50    0.33
  -2  11   0    8.03    0.33
  -2  11   0    8.22    0.27
   2 -11   0    7.76    0.33
  -3  11   0    0.61    0.17
  -3  11   0    0.77    0.19
  -3  11   0    0.66    0.11
   3 -11   0    0.65    0.18
  -4  11   0    1.31    0.20
  -4  11   0    1.37    0.19
  -4  11   0    1.41    0.13
   4 -11   0    1.30    0.09
   4 -11   0    1.58    0.22
  -5  11   0    0.68    0.12
  -5  11   0    1.15    0.24
  -5  11   0    1.00    0.19
   5 -11   0    0.99    0.23
   5 -11   0    0.73    0.13
  -6  11   0    3.61    0.27
  -6  11   0    3.24    0.32
   6 -11   0    3.37    0.30
  -7  11   0    0.87    0.26
  -7  11   0    0.55    0.22
   7 -11   0    0.89    0.30
  -8  11   0    0.64    0.31
  -8  11   0    0.42    0.25
   8 -11   0    0.94    0.33
  -9  11   0    0.65    0.33
   9 -11   0    1.03    0.37
   9  12   0    0.25    0.37
   9  12   0    0.24    0.29
  -9 -12   0   -0.16    0.35
   8  12   0    0.17    0.32
   8  12   0    0.26    0.27
  -8 -12   0   -0.22    0.31
   7  12   0    0.30    0.29
   7  12   0    0.24    0.24
  -7 -12   0    0.46    0.29
   6  12   0    0.41    0.21
   6  12   0    0.04    0.23
  -6 -12   0    0.24    0.24
   5  12   0    4.08    0.32
   5  12   0    4.49    0.31
   5  12   0    4.78    0.23
  -5 -12   0    5.12    0.37
   4  12   0    0.94    0.20
   4  12   0    0.76    0.12
   4  12   0    0.62    0.20
  -4 -12   0    0.88    0.21
   3  12   0   -0.10    0.14
   3  12   0    0.20    0.11
   3  12   0    0.10    0.18
  -3 -12   0    0.04    0.17
  -3 -12   0    0.07    0.17
   2  12   0    4.57    0.29
   2  12   0    4.50    0.23
   2  12   0    4.68    0.27
  -2 -12   0    4.73    0.14
  -2 -12   0    4.36    0.26
  -2 -12   0    4.68    0.28
   1  12   0   87.23    1.73
   1  12   0   86.85    1.67
   1  12   0   86.00    1.71
   1  12   0   86.57    1.71
  -1 -12   0   86.22    1.74
   0  12   0   22.66    0.55
   0  12   0   22.70    0.52
   0  12   0   22.56    0.55
   0  12   0   22.39    0.50
   0 -12   0   22.52    0.56
  -1  12   0   89.27    1.74
  -1  12   0   88.51    1.76
  -1  12   0   89.42    1.67
  -1  12   0   86.02    1.75
   1 -12   0   88.52    1.77
  -2  12   0    4.46    0.25
  -2  12   0    4.36    0.22
  -2  12   0    4.42    0.28
   2 -12   0    4.37    0.26
  -3  12   0    0.01    0.11
  -3  12   0    0.24    0.16
  -3  12   0    0.14    0.16
   3 -12   0    0.07    0.17
  -4  12   0    0.62    0.22
  -4  12   0    0.87    0.12
  -4  12   0    0.64    0.19
   4 -12   0    0.76    0.21
  -5  12   0    5.12    0.35
  -5  12   0    4.78    0.32
  -5  12   0    4.49    0.21
   5 -12   0    3.49    0.28
  -6  12   0    0.04    0.20
  -6  12   0   -0.06    0.24
   6 -12   0    0.32    0.26
  -7  12   0    0.68    0.28
  -7  12   0    0.40    0.22
   7 -12   0    0.38    0.28
  -8  12   0    0.42    0.30
  -8  12   0    0.47    0.24
   8 -12   0    0.62    0.32
  -9  12   0   -0.05    0.33
   9 -12   0    0.25    0.33
   9  13   0    0.53    0.29
   9  13   0    0.16    0.38
  -9 -13   0   -0.10    0.33
   8  13   0    1.84    0.39
   8  13   0    1.90    0.32
  -8 -13   0    1.91    0.37
   7  13   0    8.45    0.57
   7  13   0    8.12    0.48
  -7 -13   0    8.32    0.53
   6  13   0    1.79    0.28
   6  13   0    2.10    0.27
  -6 -13   0    2.28    0.32
   5  13   0    8.21    0.29
   5  13   0    8.10    0.42
   5  13   0    7.78    0.41
  -5 -13   0    7.60    0.42
   4  13   0    5.93    0.37
   4  13   0    6.06    0.25
   4  13   0    5.65    0.35
  -4 -13   0    5.43    0.32
   3  13   0    1.38    0.21
   3  13   0    1.34    0.15
   3  13   0    1.50    0.21
  -3 -13   0    1.41    0.21
   2  13   0    3.37    0.13
   2  13   0    3.18    0.22
   2  13   0    3.30    0.22
   2  13   0    3.31    0.24
  -2 -13   0    2.57    0.21
  -2 -13   0    3.07    0.13
   1  13   0    1.90    0.13
   1  13   0    1.91    0.20
   1  13   0    1.76    0.18
   1  13   0    1.92    0.16
  -1 -13   0    1.88    0.20
   0  13   0    0.15    0.10
   0  13   0    0.06    0.13
   0  13   0   -0.04    0.12
   0  13   0    0.24    0.13
   0 -13   0    0.07    0.16
  -1  13   0    1.83    0.18
  -1  13   0    1.91    0.18
  -1  13   0    1.81    0.11
  -1  13   0    1.96    0.18
   1 -13   0    2.06    0.21
  -2  13   0    3.62    0.27
  -2  13   0    2.94    0.21
  -2  13   0    3.37    0.24
   2 -13   0    3.29    0.25
  -3  13   0    1.52    0.15
  -3  13   0    0.95    0.19
  -3  13   0    1.33    0.20
   3 -13   0    1.57    0.22
  -4  13   0    6.04    0.24
  -4  13   0    6.12    0.33
  -4  13   0    5.78    0.38
   4 -13   0    5.99    0.36
  -5  13   0    7.81    0.38
  -5  13   0    8.18    0.28
  -5  13   0    7.57    0.40
   5 -13   0    9.02    0.44
  -6  13   0    1.87    0.25
  -6  13   0    1.90    0.32
   6 -13   0    1.96    0.30
  -7  13   0    8.45    0.43
  -7  13   0    9.03    0.54
   7 -13   0    9.08    0.54
  -8  13   0    1.97    0.28
  -8  13   0    2.00    0.37
   8 -13   0    1.16    0.35
  -9  13   0    0.17    0.33
   9 -13   0    1.03    0.37
   9  14   0    0.12    0.30
   9  14   0    0.42    0.39
  -9 -14   0    0.03    0.35
   8  14   0    0.16    0.34
   8  14   0   -0.01    0.28
  -8 -14   0    0.29    0.31
   7  14   0    1.30    0.28
   7  14   0    1.19    0.33
  -7 -14   0    1.02    0.31
   6  14   0   14.24    0.58
   6  14   0   14.75    0.57
  -6 -14   0   15.64    0.60
   5  14   0    0.98    0.24
   5  14   0    0.90    0.14
   5  14   0    0.77    0.26
  -5 -14   0    0.92    0.24
   4  14   0    0.69    0.22
   4  14   0    0.51    0.13
   4  14   0    0.56    0.22
  -4 -14   0    0.50    0.18
   3  14   0    4.17    0.23
   3  14   0    4.24    0.32
   3  14   0    3.66    0.26
  -3 -14   0    4.18    0.28
   2  14   0   11.10    0.35
   2  14   0   11.15    0.39
   2  14   0   11.43    0.41
   2  14   0   11.24    0.27
  -2 -14   0   10.96    0.40
  -2 -14   0   11.00    0.27
   1  14   0   16.04    0.38
   1  14   0   15.50    0.42
   1  14   0   15.24    0.43
   1  14   0   15.69    0.45
  -1 -14   0   14.71    0.46
   0  14   0    7.62    0.32
   0  14   0    8.21    0.25
   0  14   0    8.13    0.32
   0  14   0    7.92    0.28
   0 -14   0    7.84    0.32
  -1  14   0   15.63    0.44
  -1  14   0   15.30    0.45
  -1  14   0   15.20    0.45
  -1  14   0   15.86    0.34
   1 -14   0   15.77    0.47
  -2  14   0   11.73    0.41
  -2  14   0   11.22    0.38
  -2  14   0   11.67    0.35
   2 -14   0   11.52    0.42
  -3  14   0    4.33    0.29
  -3  14   0    4.55    0.23
  -3  14   0    4.47    0.31
   3 -14   0    4.44    0.33
  -4  14   0    0.53    0.13
  -4  14   0    0.68    0.20
  -4  14   0    0.51    0.20
   4 -14   0    0.58    0.19
  -5  14   0    0.76    0.22
  -5  14   0    1.18    0.26
   5 -14   0    1.19    0.23
  -6  14   0   13.91    0.53
  -6  14   0   15.82    0.61
   6 -14   0   15.06    0.60
  -7  14   0    1.34    0.32
  -7  14   0    1.14    0.26
   7 -14   0    0.68    0.27
  -8  14   0   -0.09    0.24
  -8  14   0    0.24    0.33
   8 -14   0    0.30    0.32
  -9  14   0   -0.10    0.35
   9 -14   0    0.39    0.37
   8  15   0    2.23    0.35
   8  15   0    2.58    0.40
  -8 -15   0    2.70    0.39
   7  15   0    2.19    0.33
   7  15   0    2.61    0.39
  -7 -15   0    2.68    0.36
   6  15   0    0.25    0.28
   6  15   0    0.23    0.26
  -6 -15   0    0.29    0.26
   5  15   0   -0.08    0.24
   5  15   0    0.16    0.23
   5  15   0    0.39    0.14
  -5 -15   0    0.09    0.23
   4  15   0    0.67    0.22
   4  15   0    0.72    0.15
   4  15   0    0.75    0.23
  -4 -15   0    0.78    0.22
   3  15   0    4.04    0.32
   3  15   0    4.70    0.33
   3  15   0    4.53    0.25
  -3 -15   0    3.87    0.29
   2  15   0    7.58    0.31
   2  15   0    8.03    0.33
   2  15   0    7.42    0.36
   2  15   0    8.07    0.22
  -2 -15   0    8.01    0.22
  -2 -15   0    7.71    0.33
   1  15   0    7.03    0.33
   1  15   0    7.34    0.31
   1  15   0    7.47    0.29
   1  15   0    7.66    0.25
  -1 -15   0    6.96    0.33
   0  15   0   -0.04    0.16
   0  15   0    0.12    0.15
   0  15   0   -0.01    0.10
   0  15   0    0.01    0.12
   0 -15   0    0.16    0.17
  -1  15   0    7.57    0.31
  -1  15   0    7.48    0.30
  -1  15   0    7.73    0.32
  -1  15   0    7.42    0.21
   1 -15   0    6.80    0.32
  -2  15   0    7.30    0.33
  -2  15   0    8.18    0.30
  -2  15   0    7.77    0.35
   2 -15   0    7.62    0.34
  -3  15   0    5.04    0.31
  -3  15   0    4.56    0.24
  -3  15   0    4.60    0.29
   3 -15   0    4.33    0.33
  -4  15   0    0.38    0.23
  -4  15   0    0.90    0.14
  -4  15   0    0.84    0.21
   4 -15   0    0.82    0.23
  -5  15   0    0.16    0.24
  -5  15   0   -0.03    0.20
   5 -15   0    0.22    0.22
  -6  15   0    0.32    0.24
  -6  15   0    0.43    0.24
   6 -15   0    0.30    0.27
  -7  15   0    2.15    0.28
  -7  15   0    2.33    0.36
   7 -15   0    1.93    0.35
  -8  15   0    2.82    0.41
  -8  15   0    2.27    0.31
   8 -15   0    2.92    0.40
  -9  15   0    0.53    0.38
   9 -15   0   -0.26    0.35
   8  16   0    2.26    0.40
   8  16   0    2.12    0.35
  -8 -16   0    2.33    0.40
   7  16   0    1.37    0.31
   7  16   0    2.38    0.39
  -7 -16   0    1.74    0.31
   6  16   0    3.96    0.34
   6  16   0    4.31    0.40
  -6 -16   0    3.67    0.36
   5  16   0    7.96    0.46
   5  16   0    7.37    0.43
  -5 -16   0    7.01    0.41
   4  16   0    1.15    0.16
   4  16   0    1.43    0.25
   4  16   0    0.86    0.25
  -4 -16   0    0.79    0.21
   3  16   0    0.24    0.21
   3  16   0   -0.09    0.14
   3  16   0    0.09    0.18
  -3 -16   0    0.20    0.17
   2  16   0    0.16    0.16
   2  16   0    0.18    0.18
   2  16   0    0.06    0.08
   2  16   0    0.10    0.14
  -2 -16   0    0.04    0.16
  -2 -16   0   -0.04    0.08
   1  16   0    0.14    0.11
   1  16   0    0.10    0.15
   1  16   0   -0.01    0.15
   1  16   0    0.03    0.13
  -1 -16   0    0.08    0.17
   0  16   0    3.37    0.19
   0  16   0    3.01    0.22
   0  16   0    3.26    0.24
   0  16   0    3.29    0.24
   0 -16   0    3.71    0.26
  -1  16   0   -0.08    0.14
  -1  16   0    0.14    0.15
  -1  16   0   -0.17    0.15
  -1  16   0   -0.10    0.08
   1 -16   0    0.05    0.15
  -2  16   0   -0.02    0.13
  -2  16   0   -0.05    0.16
  -2  16   0    0.08    0.18
   2 -16   0    0.00    0.18
  -3  16   0    0.01    0.18
  -3  16   0    0.21    0.13
  -3  16   0    0.34    0.17
   3 -16   0   -0.08    0.20
  -4  16   0    0.96    0.20
  -4  16   0    0.94    0.15
  -4  16   0    1.12    0.26
   4 -16   0    1.19    0.26
  -5  16   0    6.71    0.41
  -5  16   0    7.84    0.47
   5 -16   0    7.20    0.42
  -6  16   0    3.86    0.37
  -6  16   0    3.13    0.32
   6 -16   0    4.08    0.38
  -7  16   0    2.38    0.34
  -7  16   0    2.31    0.31
   7 -16   0    1.86    0.34
  -8  16   0    2.58    0.40
  -8  16   0    2.51    0.33
   8 -16   0    2.28    0.39
   8  17   0    1.49    0.39
   8  17   0    0.68    0.33
  -8 -17   0    0.99    0.36
   7  17   0    3.47    0.38
   7  17   0    3.85    0.44
  -7 -17   0    3.51    0.40
   6  17   0    2.44    0.33
   6  17   0    2.60    0.36
  -6 -17   0    2.47    0.32
   5  17   0    6.87    0.47
   5  17   0    7.23    0.45
  -5 -17   0    6.71    0.45
   4  17   0    0.38    0.16
   4  17   0    0.73    0.24
   4  17   0    0.53    0.25
  -4 -17   0    0.36    0.20
   3  17   0   11.29    0.38
   3  17   0   11.79    0.47
   3  17   0   11.82    0.45
  -3 -17   0   11.16    0.46
   2  17   0    0.34    0.17
   2  17   0    0.22    0.17
   2  17   0    0.17    0.09
   2  17   0    0.12    0.15
  -2 -17   0    0.14    0.09
  -2 -17   0    0.35    0.19
   1  17   0    0.33    0.17
   1  17   0    0.38    0.15
   1  17   0    0.56    0.12
   1  17   0    0.58    0.20
  -1 -17   0    0.42    0.17
   0  17   0   -0.19    0.13
   0  17   0   -0.11    0.11
   0  17   0   -0.04    0.16
   0  17   0    0.07    0.17
   0 -17   0    0.00    0.16
  -1  17   0    0.48    0.09
  -1  17   0    0.72    0.17
  -1  17   0    0.50    0.17
  -1  17   0    0.30    0.17
   1 -17   0    0.28    0.17
  -2  17   0    0.39    0.15
  -2  17   0    0.43    0.18
  -2  17   0    0.30    0.19
   2 -17   0    0.42    0.18
  -3  17   0   12.11    0.47
  -3  17   0   11.95    0.44
  -3  17   0   12.15    0.38
   3 -17   0   11.71    0.46
  -4  17   0    0.50    0.15
  -4  17   0    0.41    0.24
  -4  17   0    0.36    0.22
   4 -17   0    0.11    0.23
  -5  17   0    6.73    0.43
  -5  17   0    6.49    0.42
   5 -17   0    7.68    0.48
  -6  17   0    2.92    0.31
  -6  17   0    2.91    0.36
   6 -17   0    2.65    0.34
  -7  17   0    3.62    0.40
  -7  17   0    3.89    0.36
   7 -17   0    4.39    0.43
  -8  17   0    1.22    0.37
  -8  17   0    1.23    0.30
   8 -17   0    0.99    0.35
   8  18   0    4.34    0.43
   8  18   0    4.08    0.46
  -8 -18   0    4.67    0.49
   7  18   0    2.40    0.39
   7  18   0    2.27    0.34
  -7 -18   0    2.08    0.36
   6  18   0   13.29    0.59
   6  18   0   13.14    0.63
  -6 -18   0   11.72    0.59
   5  18   0    0.14    0.23
   5  18   0    0.30    0.26
  -5 -18   0   -0.02    0.25
   4  18   0    4.45    0.34
   4  18   0    4.44    0.28
   4  18   0    4.23    0.33
  -4 -18   0    5.25    0.40
   3  18   0   -0.19    0.21
   3  18   0   -0.02    0.16
   3  18   0    0.42    0.21
  -3 -18   0    0.30    0.21
   2  18   0    6.89    0.35
   2  18   0    7.00    0.23
   2  18   0    6.57    0.32
   2  18   0    6.49    0.38
  -2 -18   0    7.13    0.23
  -2 -18   0    6.41    0.34
   1  18   0    1.30    0.19
   1  18   0    1.20    0.17
   1  18   0    1.36    0.15
   1  18   0    1.06    0.21
  -1 -18   0    1.36    0.22
   0  18   0    1.11    0.21
   0  18   0    0.90    0.19
   0  18   0    0.98    0.16
   0  18   0    1.32    0.14
   0 -18   0    1.04    0.22
  -1  18   0    0.97    0.19
  -1  18   0    1.28    0.11
  -1  18   0    1.06    0.19
  -1  18   0    1.10    0.19
   1 -18   0    1.34    0.23
  -2  18   0    7.26    0.38
  -2  18   0    6.69    0.36
  -2  18   0    7.80    0.33
   2 -18   0    6.52    0.39
  -3  18   0    0.19    0.15
  -3  18   0    0.11    0.19
  -3  18   0    0.18    0.21
   3 -18   0   -0.15    0.19
  -4  18   0    4.64    0.28
  -4  18   0    5.29    0.42
  -4  18   0    4.58    0.33
   4 -18   0    5.16    0.37
  -5  18   0    0.17    0.24
  -5  18   0    0.84    0.28
   5 -18   0    0.28    0.27
  -6  18   0   13.49    0.58
  -6  18   0   14.18    0.64
   6 -18   0   14.86    0.64
  -7  18   0    2.34    0.40
  -7  18   0    2.08    0.32
   7 -18   0    2.02    0.35
  -8  18   0    5.28    0.50
  -8  18   0    4.39    0.40
   8 -18   0    4.04    0.44
   8  19   0    0.12    0.32
   8  19   0    0.12    0.35
  -8 -19   0    0.07    0.35
   7  19   0   -0.13    0.31
   7  19   0    0.16    0.30
  -7 -19   0    0.49    0.32
   6  19   0    3.28    0.37
   6  19   0    4.45    0.43
  -6 -19   0    2.82    0.34
   5  19   0   15.38    0.61
   5  19   0   13.99    0.60
  -5 -19   0   13.18    0.56
   4  19   0    5.58    0.42
   4  19   0    6.60    0.32
   4  19   0    6.43    0.40
  -4 -19   0    6.19    0.40
   3  19   0    0.16    0.19
   3  19   0    0.05    0.20
   3  19   0   -0.12    0.16
  -3 -19   0    0.43    0.23
   2  19   0    1.43    0.20
   2  19   0    1.16    0.23
   2  19   0    1.53    0.21
  -2 -19   0    1.46    0.24
   1  19   0   -0.08    0.12
   1  19   0   -0.18    0.17
   1  19   0    0.02    0.15
   1  19   0   -0.02    0.17
  -1 -19   0    0.21    0.18
   0  19   0   -0.08    0.12
   0  19   0   -0.03    0.19
   0  19   0   -0.07    0.14
   0  19   0    0.17    0.17
   0 -19   0   -0.05    0.19
  -1  19   0   -0.04    0.16
  -1  19   0    0.01    0.20
  -1  19   0    0.10    0.17
   1 -19   0   -0.17    0.20
  -2  19   0    1.10    0.21
  -2  19   0    1.52    0.20
  -2  19   0    1.57    0.24
   2 -19   0    1.55    0.23
  -3  19   0    0.11    0.22
  -3  19   0    0.02    0.21
  -3  19   0    0.19    0.16
   3 -19   0    0.03    0.21
  -4  19   0    6.90    0.32
  -4  19   0    6.93    0.45
  -4  19   0    5.39    0.37
   4 -19   0    6.59    0.46
  -5  19   0   14.70    0.58
  -5  19   0   14.70    0.63
   5 -19   0   15.85    0.64
  -6  19   0    3.74    0.41
  -6  19   0    3.41    0.36
   6 -19   0    3.62    0.37
  -7  19   0    0.26    0.33
  -7  19   0    0.04    0.27
   7 -19   0    0.11    0.31
  -8  19   0    0.18    0.28
  -8  19   0   -0.23    0.35
   8 -19   0    0.12    0.32
   7  20   0    0.41    0.33
   7  20   0    0.37    0.36
  -7 -20   0    0.39    0.29
   6  20   0    0.70    0.32
   6  20   0    0.86    0.34
  -6 -20   0    0.02    0.29
   5  20   0    0.30    0.28
   5  20   0    0.41    0.28
  -5 -20   0    0.40    0.28
   4  20   0    0.30    0.24
   4  20   0   -0.04    0.25
   4  20   0   -0.22    0.17
  -4 -20   0    0.48    0.25
   3  20   0    0.11    0.23
   3  20   0    0.29    0.21
   3  20   0    0.45    0.18
  -3 -20   0    0.02    0.23
   2  20   0    2.34    0.23
   2  20   0    2.15    0.23
   2  20   0    1.50    0.25
  -2 -20   0    2.06    0.27
   1  20   0    2.34    0.24
   1  20   0    2.26    0.19
   1  20   0    2.22    0.26
   1  20   0    2.26    0.20
  -1 -20   0    1.81    0.25
   0  20   0    1.83    0.22
   0  20   0    1.77    0.24
   0  20   0    1.96    0.20
   0  20   0    1.67    0.16
   0 -20   0    1.40    0.23
  -1  20   0    2.07    0.26
  -1  20   0    2.13    0.23
  -1  20   0    2.52    0.24
   1 -20   0    2.01    0.26
  -2  20   0    1.98    0.25
  -2  20   0    1.61    0.25
  -2  20   0    1.83    0.22
   2 -20   0    2.35    0.28
  -3  20   0    0.15    0.17
  -3  20   0    0.33    0.24
  -3  20   0   -0.11    0.22
   3 -20   0    0.01    0.23
  -4  20   0   -0.31    0.24
  -4  20   0    0.13    0.21
   4 -20   0   -0.10    0.26
  -5  20   0   -0.15    0.27
  -5  20   0   -0.32    0.22
   5 -20   0    0.26    0.28
  -6  20   0    1.07    0.28
  -6  20   0    0.80    0.34
   6 -20   0    1.15    0.33
  -7  20   0    0.46    0.30
  -7  20   0    0.82    0.35
   7 -20   0    0.23    0.34
   7  21   0    2.24    0.38
   7  21   0    1.74    0.38
  -7 -21   0    2.13    0.39
   6  21   0    1.22    0.34
   6  21   0    0.93    0.33
  -6 -21   0    1.08    0.32
   5  21   0    0.50    0.29
   5  21   0    0.72    0.31
  -5 -21   0    0.40    0.29
   4  21   0    0.28    0.19
   4  21   0    0.52    0.26
   4  21   0    0.21    0.24
  -4 -21   0    0.01    0.25
   3  21   0    0.42    0.24
   3  21   0    0.24    0.18
   3  21   0    0.24    0.21
  -3 -21   0    0.41    0.22
   2  21   0    2.68    0.25
   2  21   0    2.96    0.30
   2  21   0    3.03    0.26
  -2 -21   0    2.62    0.30
   1  21   0   11.89    0.37
   1  21   0   11.74    0.40
   1  21   0   11.69    0.48
   1  21   0   11.24    0.45
  -1 -21   0   11.75    0.37
  -1 -21   0   12.17    0.50
   0  21   0    0.33    0.21
   0  21   0   -0.09    0.20
   0  21   0    0.06    0.16
   0 -21   0    0.02    0.22
  -1  21   0   12.03    0.44
  -1  21   0   11.74    0.45
  -1  21   0   12.60    0.47
   1 -21   0   12.23    0.51
  -2  21   0    2.79    0.28
  -2  21   0    2.28    0.27
  -2  21   0    3.23    0.26
   2 -21   0    3.00    0.32
  -3  21   0    0.11    0.23
  -3  21   0    0.19    0.23
  -3  21   0    0.38    0.17
   3 -21   0   -0.19    0.25
  -4  21   0    0.12    0.26
  -4  21   0    0.31    0.25
   4 -21   0    0.54    0.29
  -5  21   0    0.44    0.26
  -5  21   0    0.10    0.26
   5 -21   0    0.10    0.27
  -6  21   0    1.40    0.31
  -6  21   0    0.71    0.33
   6 -21   0    0.75    0.33
  -7  21   0    2.02    0.34
  -7  21   0    2.70    0.43
   7 -21   0    2.46    0.41
   7  22   0    0.83    0.37
   7  22   0    0.52    0.37
  -7 -22   0    0.45    0.31
   6  22   0    3.18    0.42
   6  22   0    2.23    0.38
  -6 -22   0    2.67    0.39
   5  22   0    1.65    0.34
   5  22   0    0.63    0.31
  -5 -22   0    0.92    0.29
   4  22   0    0.11    0.19
   4  22   0   -0.32    0.27
   4  22   0    0.06    0.25
  -4 -22   0    0.22    0.26
   3  22   0   -0.21    0.22
   3  22   0   -0.10    0.18
   3  22   0   -0.28    0.23
  -3 -22   0    0.54    0.25
   2  22   0   -0.17    0.19
   2  22   0    0.21    0.24
   2  22   0    0.11    0.19
  -2 -22   0   -0.40    0.21
   1  22   0   11.54    0.46
   1  22   0   11.05    0.48
   1  22   0   11.35    0.41
  -1 -22   0   10.79    0.49
   0  22   0    5.39    0.38
   0  22   0    5.83    0.39
   0  22   0    6.27    0.32
   0 -22   0    6.38    0.42
  -1  22   0   11.31    0.45
  -1  22   0   10.72    0.44
  -1  22   0    9.96    0.47
   1 -22   0   11.46    0.50
  -2  22   0   -0.24    0.20
  -2  22   0   -0.40    0.20
  -2  22   0    0.30    0.19
   2 -22   0   -0.45    0.23
  -3  22   0    0.08    0.18
  -3  22   0   -0.14    0.22
  -3  22   0   -0.28    0.20
   3 -22   0   -0.30    0.22
  -4  22   0    0.26    0.26
  -4  22   0    0.03    0.26
   4 -22   0    0.00    0.29
  -5  22   0    0.73    0.28
  -5  22   0    1.00    0.32
   5 -22   0    0.82    0.31
  -6  22   0    2.38    0.35
  -6  22   0    3.16    0.42
   6 -22   0    2.17    0.38
  -7  22   0    0.03    0.30
  -7  22   0    0.77    0.38
   7 -22   0    0.56    0.36
   7  23   0    0.60    0.38
   7  23   0    0.49    0.36
  -7 -23   0    0.50    0.35
   6  23   0    1.08    0.37
   6  23   0    0.88    0.36
  -6 -23   0    0.94    0.35
   5  23   0    3.00    0.38
   5  23   0    2.75    0.38
  -5 -23   0    2.49    0.35
   4  23   0    0.90    0.28
   4  23   0    1.39    0.30
   4  23   0    1.20    0.22
  -4 -23   0    1.25    0.30
   3  23   0    2.88    0.30
   3  23   0    2.91    0.28
   3  23   0    2.50    0.33
  -3 -23   0    2.47    0.33
   2  23   0    0.39    0.21
   2  23   0    0.42    0.21
   2  23   0    0.53    0.23
  -2 -23   0    0.28    0.23
   1  23   0   13.82    0.52
   1  23   0   14.52    0.52
  -1 -23   0   14.17    0.57
   0  23   0    0.05    0.17
   0  23   0    0.18    0.22
   0  23   0   -0.25    0.21
   0 -23   0   -0.19    0.22
  -1  23   0   14.54    0.55
  -1  23   0   13.95    0.49
  -1  23   0   14.16    0.51
   1 -23   0   13.33    0.54
  -2  23   0    0.57    0.21
  -2  23   0    0.34    0.23
  -2  23   0    0.19    0.23
   2 -23   0    0.36    0.27
  -3  23   0    3.06    0.33
  -3  23   0    2.83    0.25
  -3  23   0    3.01    0.33
   3 -23   0    2.50    0.35
  -4  23   0    1.03    0.26
  -4  23   0    1.31    0.31
   4 -23   0    1.07    0.31
  -5  23   0    2.79    0.39
  -5  23   0    2.77    0.34
   5 -23   0    2.42    0.38
  -6  23   0    0.70    0.36
  -6  23   0    0.70    0.30
   6 -23   0    0.06    0.32
  -7  23   0    0.91    0.33
  -7  23   0    0.66    0.39
   7 -23   0    0.02    0.35
   6  24   0    0.78    0.35
   6  24   0    0.58    0.31
  -6 -24   0    0.67    0.34
   5  24   0    1.17    0.34
   5  24   0    1.72    0.35
  -5 -24   0    1.55    0.35
   4  24   0    0.47    0.28
   4  24   0    0.40    0.22
   4  24   0    0.27    0.29
  -4 -24   0    0.27    0.28
   3  24   0    0.25    0.24
   3  24   0    0.25    0.21
   3  24   0   -0.03    0.27
  -3 -24   0   -0.07    0.26
   2  24   0    4.10    0.31
   2  24   0    4.43    0.38
   2  24   0    4.80    0.36
  -2 -24   0    5.15    0.41
   1  24   0   32.76    0.90
   1  24   0   34.08    0.88
  -1 -24   0   34.51    0.94
   0  24   0    0.79    0.22
   0  24   0    1.36    0.26
   0  24   0    0.93    0.21
   0 -24   0    0.89    0.29
  -1  24   0   33.49    0.88
  -1  24   0   34.92    0.90
  -1  24   0   34.30    0.87
   1 -24   0   34.46    0.95
  -2  24   0    3.62    0.33
  -2  24   0    4.63    0.36
  -2  24   0    4.54    0.35
   2 -24   0    5.22    0.40
  -3  24   0    0.47    0.28
  -3  24   0    0.38    0.20
  -3  24   0    0.23    0.26
   3 -24   0    0.26    0.29
  -4  24   0    0.61    0.28
  -4  24   0    0.17    0.29
   4 -24   0    0.44    0.31
  -5  24   0    1.22    0.29
  -5  24   0    1.10    0.35
   5 -24   0    1.76    0.37
  -6  24   0    0.90    0.29
  -6  24   0    0.76    0.33
   6 -24   0    0.58    0.34
   6  25   0   -0.21    0.33
   6  25   0   -0.44    0.34
  -6 -25   0   -0.34    0.33
   5  25   0    1.02    0.35
   5  25   0    1.05    0.33
  -5 -25   0    0.80    0.33
   4  25   0    0.28    0.28
   4  25   0    0.34    0.27
  -4 -25   0   -0.06    0.29
   3  25   0    0.87    0.27
   3  25   0    1.26    0.24
   3  25   0    0.82    0.26
  -3 -25   0    1.21    0.32
   2  25   0    2.48    0.28
   2  25   0    1.96    0.31
  -2 -25   0    2.52    0.31
   1  25   0    1.63    0.27
   1  25   0    1.71    0.30
  -1 -25   0    2.43    0.33
   0  25   0    0.09    0.22
   0  25   0    0.01    0.22
   0  25   0   -0.14    0.23
   0 -25   0    0.36    0.28
  -1  25   0    1.97    0.31
  -1  25   0    1.70    0.26
  -1  25   0    1.88    0.26
   1 -25   0    2.52    0.34
  -2  25   0    1.96    0.31
  -2  25   0    2.29    0.27
  -2  25   0    2.53    0.30
   2 -25   0    2.32    0.31
  -3  25   0    0.63    0.27
  -3  25   0    1.20    0.30
  -3  25   0    1.24    0.24
   3 -25   0    0.69    0.31
  -4  25   0    0.22    0.28
  -4  25   0    0.23    0.30
   4 -25   0   -0.18    0.29
  -5  25   0    0.90    0.33
  -5  25   0    1.40    0.36
   5 -25   0    1.67    0.34
  -6  25   0    0.06    0.30
  -6  25   0    0.23    0.35
   6 -25   0   -0.13    0.35
   5  26   0   -0.31    0.31
   5  26   0    0.12    0.30
  -5 -26   0    0.20    0.32
   4  26   0   -0.03    0.30
   4  26   0    0.20    0.29
  -4 -26   0   -0.03    0.29
   3  26   0    0.42    0.25
   3  26   0    0.58    0.24
   3  26   0    1.00    0.33
  -3 -26   0    1.01    0.31
   2  26   0    0.18    0.26
   2  26   0    0.08    0.23
  -2 -26   0    0.29    0.27
   1  26   0   -0.01    0.22
   1  26   0    0.25    0.26
  -1 -26   0   -0.05    0.27
   0  26   0   14.82    0.58
   0  26   0   13.49    0.55
   0 -26   0   13.12    0.57
  -1  26   0    0.15    0.22
  -1  26   0    0.40    0.23
  -1  26   0    0.08    0.23
   1 -26   0    0.49    0.29
  -2  26   0    0.18    0.25
  -2  26   0   -0.04    0.27
  -2  26   0    0.04    0.22
   2 -26   0   -0.33    0.28
  -3  26   0    0.52    0.28
  -3  26   0    0.61    0.29
   3 -26   0    0.59    0.32
  -4  26   0    0.11    0.30
  -4  26   0   -0.32    0.26
   4 -26   0   -0.18    0.32
  -5  26   0    0.24    0.29
  -5  26   0    0.03    0.32
   5 -26   0    0.40    0.36
   5  27   0    0.66    0.33
   5  27   0    0.13    0.36
  -5 -27   0    0.62    0.33
   4  27   0    2.93    0.37
   4  27   0    3.47    0.37
  -4 -27   0    3.35    0.40
   3  27   0    1.68    0.31
   3  27   0    1.42    0.27
  -3 -27   0    1.80    0.33
   2  27   0    0.04    0.25
   2  27   0    0.26    0.30
  -2 -27   0    0.12    0.29
   1  27   0    0.46    0.23
   1  27   0    0.72    0.28
  -1 -27   0    0.54    0.27
   0  27   0    0.29    0.25
   0  27   0    0.38    0.27
   0 -27   0    0.33    0.29
  -1  27   0    0.51    0.25
  -1  27   0    0.15    0.28
  -1  27   0    0.28    0.24
   1 -27   0    0.16    0.27
  -2  27   0    0.25    0.27
  -2  27   0   -0.09    0.28
  -2  27   0    0.04    0.22
   2 -27   0   -0.52    0.29
  -3  27   0    1.33    0.32
  -3  27   0    1.37    0.34
   3 -27   0    1.44    0.34
  -4  27   0    2.90    0.38
  -4  27   0    3.06    0.39
   4 -27   0    3.23    0.43
  -5  27   0    0.64    0.36
  -5  27   0    0.93    0.34
   5 -27   0    0.46    0.35
   4  28   0    0.91    0.35
   4  28   0    0.97    0.36
  -4 -28   0    1.13    0.34
   3  28   0    0.48    0.32
   3  28   0    0.34    0.26
  -3 -28   0    0.68    0.32
   2  28   0    0.45    0.24
   2  28   0    0.16    0.29
  -2 -28   0    0.30    0.30
   1  28   0   -0.06    0.24
   1  28   0    0.29    0.27
  -1 -28   0    0.08    0.29
   0  28   0    4.15    0.36
   0  28   0    4.08    0.38
   0 -28   0    5.05    0.44
  -1  28   0   -0.06    0.27
  -1  28   0   -0.19    0.23
   1 -28   0    0.24    0.31
  -2  28   0    0.32    0.24
  -2  28   0    0.29    0.27
  -2  28   0   -0.04    0.26
   2 -28   0   -0.21    0.27
  -3  28   0    0.75    0.33
  -3  28   0    0.90    0.32
   3 -28   0    1.11    0.35
  -4  28   0    1.01    0.34
  -4  28   0    1.36    0.35
   4 -28   0    0.74    0.36
   4  29   0    0.58    0.35
  -4 -29   0    0.87    0.36
   3  29   0    1.42    0.36
   3  29   0    1.78    0.30
  -3 -29   0    1.12    0.34
   2  29   0   -0.28    0.24
   2  29   0    0.09    0.27
  -2 -29   0   -0.02    0.29
   1  29   0   -0.06    0.25
   1  29   0    0.04    0.26
  -1 -29   0   -0.18    0.30
   0  29   0   -0.08    0.25
   0  29   0    0.04    0.24
   0 -29   0    0.01    0.29
  -1  29   0    0.18    0.28
  -1  29   0    0.01    0.26
   1 -29   0    0.49    0.33
  -2  29   0    0.31    0.30
  -2  29   0   -0.34    0.26
  -2  29   0    0.23    0.24
   2 -29   0    0.10    0.33
  -3  29   0    2.18    0.38
  -3  29   0    2.21    0.36
   3 -29   0    2.46    0.41
  -4  29   0    1.32    0.36
  -4  29   0    1.54    0.37
   4 -29   0    0.90    0.36
   3  30   0    0.94    0.32
   3  30   0    0.63    0.27
  -3 -30   0    0.72    0.35
   2  30   0    0.37    0.27
   2  30   0    0.25    0.31
  -2 -30   0   -0.02    0.28
   1  30   0    0.23    0.29
   1  30   0    0.11    0.27
  -1 -30   0    0.21    0.32
   0  30   0    2.27    0.33
   0  30   0    1.49    0.31
   0 -30   0    2.50    0.37
  -1  30   0    0.23    0.31
  -1  30   0    0.47    0.27
   1 -30   0    0.37    0.34
  -2  30   0    0.34    0.31
  -2  30   0   -0.03    0.37
  -2  30   0    0.29    0.29
   2 -30   0    0.30    0.30
  -3  30   0    0.74    0.34
  -3  30   0    1.24    0.34
   3 -30   0    0.53    0.37
   2  31   0    0.83    0.30
   2  31   0    0.71    0.34
  -2 -31   0    0.90    0.32
   1  31   0    0.07    0.30
   1  31   0    0.90    0.30
  -1 -31   0    1.02    0.35
   0  31   0   -0.16    0.28
   0  31   0    0.37    0.29
   0 -31   0    0.17    0.33
  -1  31   0    0.82    0.30
  -1  31   0    0.49    0.30
   1 -31   0    1.00    0.36
  -2  31   0    0.51    0.33
   2 -31   0    0.81    0.37
   0  32   0    0.05    0.30
   0  32   0   -0.28    0.28
   0 -32   0    0.08    0.35
   0 -32   1    0.34    0.35
   0  32  -1    0.12    0.29
   0  32  -1    0.16    0.30
   2 -31   1   -0.05    0.35
  -2  31  -1    0.20    0.32
   1 -31   1    1.13    0.38
  -1  31  -1    0.65    0.29
  -1  31  -1    1.15    0.34
   0 -31   1   -0.17    0.33
   0  31  -1    1.03    0.30
   0  31  -1    0.19    0.29
  -1 -31   1    3.74    0.44
   1  31  -1    3.15    0.36
   1  31  -1    3.56    0.39
  -2 -31   1    0.36    0.29
   2  31  -1    0.27    0.28
   2  31  -1   -0.15    0.31
   3 -30   1    0.22    0.37
  -3  30  -1    0.47    0.31
  -3  30  -1    0.79    0.34
   2 -30   1    0.60    0.32
  -2  30  -1    0.32    0.30
  -2  30  -1    0.48    0.30
   1 -30   1   -0.18    0.33
  -1  30  -1   -0.11    0.30
  -1  30  -1    0.29    0.27
   0 -30   1    0.62    0.32
   0  30  -1   -0.18    0.26
   0  30  -1   -0.13    0.27
  -1 -30   1    0.37    0.33
   1  30  -1    0.21    0.28
   1  30  -1    0.65    0.27
  -2 -30   1   -0.11    0.27
   2  30  -1   -0.36    0.26
   2  30  -1   -0.14    0.28
  -3 -30   1    0.09    0.33
   3  30  -1    0.47    0.34
   3  30  -1    0.19    0.26
   4 -29   1    1.79    0.37
  -4  29  -1    2.39    0.36
  -4  29  -1    2.01    0.39
   3 -29   1    0.92    0.36
  -3  29  -1    0.54    0.29
  -3  29  -1    0.25    0.30
   2 -29   1    1.41    0.38
  -2  29  -1    2.00    0.33
  -2  29  -1    2.64    0.34
  -2  29  -1    2.10    0.36
   1 -29   1    0.23    0.32
  -1  29  -1    0.29    0.25
  -1  29  -1   -0.02    0.25
   0 -29   1   -0.19    0.26
   0  29  -1    0.04    0.24
   0  29  -1   -0.16    0.26
  -1 -29   1    3.34    0.42
   1  29  -1    3.29    0.37
   1  29  -1    3.08    0.34
  -2 -29   1    0.33    0.28
   2  29  -1    0.22    0.26
   2  29  -1    0.67    0.32
  -3 -29   1    0.51    0.32
   3  29  -1    0.44    0.33
   3  29  -1    0.32    0.26
  -4 -29   1    1.68    0.39
   4  29  -1    1.97    0.39
   4 -28   1   -0.24    0.33
  -4  28  -1    0.39    0.32
  -4  28  -1   -0.20    0.27
   3 -28   1    0.29    0.33
  -3  28  -1   -0.03    0.29
  -3  28  -1    0.25    0.30
   2 -28   1    1.35    0.35
  -2  28  -1    0.96    0.26
  -2  28  -1    1.35    0.30
  -2  28  -1    1.06    0.32
   1 -28   1   -0.61    0.28
  -1  28  -1    0.00    0.27
  -1  28  -1    0.17    0.24
   0 -28   1    0.48    0.30
   0  28  -1    0.52    0.25
   0  28  -1    0.08    0.27
  -1 -28   1    0.88    0.30
   1  28  -1    1.32    0.29
   1  28  -1    0.95    0.30
  -2 -28   1    0.21    0.29
   2  28  -1   -0.07    0.25
   2  28  -1   -0.31    0.27
  -3 -28   1    0.59    0.31
   3  28  -1   -0.07    0.25
   3  28  -1   -0.68    0.28
  -4 -28   1    0.33    0.32
   4  28  -1   -0.38    0.30
   4  28  -1    0.00    0.31
   5 -27   1    0.86    0.36
  -5  27  -1    0.57    0.29
  -5  27  -1    1.24    0.37
   4 -27   1    0.00    0.33
  -4  27  -1    0.04    0.31
  -4  27  -1   -0.38    0.25
   3 -27   1   -0.14    0.31
  -3  27  -1    0.10    0.28
  -3  27  -1    0.47    0.29
   2 -27   1    0.46    0.31
  -2  27  -1    0.04    0.26
  -2  27  -1    0.39    0.23
  -2  27  -1    0.82    0.30
   1 -27   1   -0.34    0.25
  -1  27  -1    0.19    0.23
  -1  27  -1   -0.18    0.27
  -1  27  -1   -0.04    0.23
   0 -27   1    5.94    0.45
   0  27  -1    5.08    0.38
   0  27  -1    4.41    0.37
  -1 -27   1    0.36    0.29
   1  27  -1    0.16    0.24
   1  27  -1    0.07    0.26
  -2 -27   1    0.15    0.29
   2  27  -1    0.15    0.23
   2  27  -1    0.34    0.27
  -3 -27   1    0.56    0.30
   3  27  -1    0.16    0.24
   3  27  -1   -0.33    0.30
  -4 -27   1    0.27    0.31
   4  27  -1   -0.03    0.29
   4  27  -1    0.08    0.32
  -5 -27   1    0.11    0.29
   5  27  -1   -0.49    0.31
   5  27  -1    0.35    0.33
   5 -26   1    0.30    0.36
  -5  26  -1    0.21    0.33
  -5  26  -1   -0.16    0.29
   4 -26   1    0.27    0.34
  -4  26  -1    0.16    0.28
  -4  26  -1    0.51    0.31
   3 -26   1    1.18    0.33
  -3  26  -1    1.51    0.32
  -3  26  -1    1.16    0.31
   2 -26   1    0.34    0.30
  -2  26  -1    0.03    0.24
  -2  26  -1    0.29    0.28
  -2  26  -1    0.46    0.22
   1 -26   1   -0.40    0.27
  -1  26  -1   -0.46    0.21
  -1  26  -1    0.11    0.22
  -1  26  -1    0.04    0.23
   0 -26   1    1.40    0.31
   0  26  -1    1.23    0.28
   0  26  -1    1.73    0.29
  -1 -26   1    0.20    0.29
   1  26  -1   -0.01    0.24
   1  26  -1    0.05    0.25
  -2 -26   1    1.48    0.33
   2  26  -1    1.54    0.31
   2  26  -1    1.36    0.27
  -3 -26   1    0.77    0.30
   3  26  -1    0.13    0.22
   3  26  -1   -0.21    0.28
   3  26  -1    0.26    0.24
  -4 -26   1    0.87    0.32
   4  26  -1    1.21    0.33
   4  26  -1    1.01    0.31
  -5 -26   1    1.50    0.36
   5  26  -1    1.11    0.37
   5  26  -1    1.13    0.35
   6 -25   1   -0.01    0.35
  -6  25  -1   -0.45    0.32
  -6  25  -1   -0.01    0.28
   5 -25   1    0.03    0.33
  -5  25  -1    0.22    0.25
  -5  25  -1    0.15    0.32
   4 -25   1   -0.47    0.29
  -4  25  -1    0.14    0.28
  -4  25  -1    0.36    0.29
   3 -25   1    0.00    0.30
  -3  25  -1    0.22    0.27
  -3  25  -1    0.20    0.28
   2 -25   1    1.24    0.31
  -2  25  -1    2.19    0.27
  -2  25  -1    1.46    0.28
  -2  25  -1    0.92    0.27
   1 -25   1    0.19    0.27
  -1  25  -1   -0.08    0.22
  -1  25  -1    0.04    0.21
  -1  25  -1    0.43    0.26
   0 -25   1    9.28    0.49
   0  25  -1   10.36    0.49
   0  25  -1    9.75    0.49
   0  25  -1   10.16    0.53
  -1 -25   1    0.76    0.29
   1  25  -1    1.16    0.29
   1  25  -1    1.46    0.27
  -2 -25   1    4.01    0.36
   2  25  -1    3.88    0.34
   2  25  -1    4.38    0.33
  -3 -25   1    0.49    0.28
   3  25  -1    0.52    0.25
   3  25  -1    0.43    0.29
   3  25  -1    0.66    0.24
  -4 -25   1    0.38    0.30
   4  25  -1    0.78    0.29
   4  25  -1    0.46    0.31
   4  25  -1    0.47    0.23
  -5 -25   1    0.63    0.31
   5  25  -1    0.65    0.32
   5  25  -1    0.35    0.30
  -6 -25   1    0.19    0.33
   6  25  -1   -0.03    0.32
   6  25  -1    0.09    0.36
   6 -24   1    0.03    0.32
  -6  24  -1    0.33    0.30
  -6  24  -1    0.81    0.35
   5 -24   1    0.35    0.34
  -5  24  -1    0.24    0.32
  -5  24  -1    0.25    0.29
   4 -24   1    0.62    0.32
  -4  24  -1    0.57    0.30
  -4  24  -1    0.34    0.27
   3 -24   1    0.15    0.30
  -3  24  -1   -0.18    0.25
  -3  24  -1    0.11    0.19
  -3  24  -1    0.21    0.26
   2 -24   1    0.61    0.26
  -2  24  -1    0.31    0.23
  -2  24  -1    0.05    0.20
  -2  24  -1   -0.01    0.25
   1 -24   1    3.67    0.34
  -1  24  -1    3.91    0.31
  -1  24  -1    3.34    0.29
  -1  24  -1    3.62    0.34
   0 -24   1   -0.23    0.25
   0  24  -1    0.03    0.18
   0  24  -1   -0.18    0.22
   0  24  -1    0.07    0.24
  -1 -24   1    0.08    0.24
   1  24  -1   -0.03    0.23
   1  24  -1    0.22    0.21
  -2 -24   1    2.38    0.31
   2  24  -1    2.19    0.32
   2  24  -1    2.19    0.28
   2  24  -1    2.51    0.26
  -3 -24   1    1.68    0.31
   3  24  -1    1.57    0.25
   3  24  -1    1.84    0.32
   3  24  -1    1.56    0.28
  -4 -24   1    4.27    0.41
   4  24  -1    4.77    0.41
   4  24  -1    4.90    0.37
   4  24  -1    4.99    0.40
  -5 -24   1    1.00    0.33
   5  24  -1    0.42    0.33
   5  24  -1    0.46    0.32
  -6 -24   1   -0.19    0.32
   6  24  -1   -0.28    0.31
   6  24  -1   -0.34    0.33
   7 -23   1    1.34    0.41
  -7  23  -1    1.30    0.40
  -7  23  -1    1.29    0.35
   6 -23   1    0.30    0.35
  -6  23  -1    0.65    0.30
  -6  23  -1    1.08    0.36
   5 -23   1    0.89    0.33
  -5  23  -1    0.75    0.34
  -5  23  -1    0.64    0.28
   4 -23   1    0.11    0.28
  -4  23  -1    0.24    0.26
  -4  23  -1    0.11    0.29
   3 -23   1   -0.34    0.27
  -3  23  -1    0.00    0.24
  -3  23  -1    0.09    0.25
  -3  23  -1    0.14    0.18
   2 -23   1   -0.11    0.26
  -2  23  -1    0.01    0.19
  -2  23  -1    0.01    0.23
  -2  23  -1    0.25    0.25
   1 -23   1    0.18    0.25
  -1  23  -1    0.12    0.21
  -1  23  -1    0.06    0.20
  -1  23  -1    0.09    0.20
   0 -23   1    1.04    0.28
   0  23  -1    0.36    0.23
   0  23  -1    0.43    0.18
   0  23  -1    0.84    0.25
  -1 -23   1    0.00    0.21
   1  23  -1    0.11    0.22
   1  23  -1    0.27    0.22
   1  23  -1    0.05    0.28
  -2 -23   1    0.12    0.23
   2  23  -1   -0.08    0.19
   2  23  -1   -0.02    0.19
   2  23  -1    0.13    0.22
  -3 -23   1    0.02    0.25
   3  23  -1   -0.04    0.22
   3  23  -1    0.01    0.23
   3  23  -1    0.11    0.20
  -4 -23   1    0.91    0.30
   4  23  -1    0.56    0.21
   4  23  -1    0.55    0.29
   4  23  -1    0.81    0.28
  -5 -23   1    0.77    0.30
   5  23  -1    0.59    0.30
   5  23  -1    0.91    0.31
  -6 -23   1    1.33    0.35
   6  23  -1    0.59    0.36
   6  23  -1    0.30    0.33
  -7 -23   1   -0.29    0.31
   7  23  -1    0.13    0.35
   7  23  -1    0.02    0.31
   7 -22   1    0.02    0.36
  -7  22  -1    0.15    0.36
  -7  22  -1    0.21    0.29
   6 -22   1    2.67    0.41
  -6  22  -1    1.50    0.38
  -6  22  -1    1.54    0.32
   5 -22   1    4.22    0.39
  -5  22  -1    4.13    0.42
  -5  22  -1    3.54    0.34
   4 -22   1    2.68    0.36
  -4  22  -1    2.25    0.33
  -4  22  -1    2.43    0.31
   3 -22   1    8.33    0.50
  -3  22  -1    8.96    0.48
  -3  22  -1    8.63    0.48
  -3  22  -1    8.67    0.37
   2 -22   1    0.11    0.25
  -2  22  -1   -0.05    0.21
  -2  22  -1    0.04    0.23
  -2  22  -1    0.13    0.18
   1 -22   1    1.77    0.28
  -1  22  -1    1.84    0.24
  -1  22  -1    2.16    0.25
  -1  22  -1    2.31    0.28
   0 -22   1    1.74    0.28
   0  22  -1    1.84    0.21
   0  22  -1    1.69    0.25
   0  22  -1    1.48    0.27
  -1 -22   1    0.28    0.21
   1  22  -1    0.42    0.23
   1  22  -1    0.79    0.23
   1  22  -1    0.53    0.17
  -2 -22   1    1.53    0.28
   2  22  -1    1.53    0.23
   2  22  -1    1.41    0.28
   2  22  -1    1.81    0.23
  -3 -22   1    1.02    0.27
   3  22  -1    0.57    0.23
   3  22  -1    0.82    0.22
   3  22  -1    0.68    0.27
  -4 -22   1    0.56    0.26
   4  22  -1    0.37    0.20
   4  22  -1    0.64    0.26
   4  22  -1    0.68    0.29
  -5 -22   1    3.31    0.37
   5  22  -1    3.24    0.37
   5  22  -1    3.89    0.40
  -6 -22   1    1.92    0.36
   6  22  -1    1.39    0.36
   6  22  -1    1.61    0.37
  -7 -22   1    0.70    0.35
   7  22  -1    0.11    0.35
   7  22  -1    0.83    0.38
   7 -21   1    5.06    0.49
  -7  21  -1    5.19    0.50
  -7  21  -1    3.99    0.40
   6 -21   1   13.37    0.67
  -6  21  -1   12.77    0.57
  -6  21  -1   11.67    0.64
   5 -21   1    1.59    0.31
  -5  21  -1    2.65    0.37
  -5  21  -1    1.79    0.28
   4 -21   1    0.76    0.31
  -4  21  -1    1.20    0.28
  -4  21  -1    1.52    0.30
   3 -21   1    1.04    0.29
  -3  21  -1    0.96    0.26
  -3  21  -1    1.04    0.19
  -3  21  -1    1.01    0.23
   2 -21   1    1.98    0.27
  -2  21  -1    1.95    0.27
  -2  21  -1    2.13    0.23
  -2  21  -1    2.15    0.27
   1 -21   1    0.44    0.21
  -1  21  -1    1.19    0.21
  -1  21  -1    0.93    0.21
  -1  21  -1    0.55    0.20
   0 -21   1    2.32    0.26
   0  21  -1    3.06    0.23
   0  21  -1    3.13    0.29
   0  21  -1    2.36    0.25
  -1 -21   1    7.20    0.40
   1  21  -1    9.17    0.36
   1  21  -1    9.02    0.41
   1  21  -1    9.32    0.33
   1  21  -1    9.32    0.43
  -2 -21   1    0.08    0.21
   2  21  -1    0.27    0.19
   2  21  -1   -0.06    0.21
   2  21  -1    0.00    0.18
  -3 -21   1    0.10    0.22
   3  21  -1    0.22    0.22
   3  21  -1    0.58    0.22
   3  21  -1    0.10    0.19
  -4 -21   1    1.61    0.31
   4  21  -1    2.27    0.24
   4  21  -1    2.19    0.30
   4  21  -1    1.50    0.28
  -5 -21   1    4.36    0.39
   5  21  -1    4.26    0.39
   5  21  -1    4.66    0.40
  -6 -21   1    1.15    0.32
   6  21  -1    1.56    0.36
   6  21  -1    1.40    0.34
  -7 -21   1    0.10    0.33
   7  21  -1    0.32    0.33
   7  21  -1    0.21    0.35
   7 -20   1   -0.77    0.32
  -7  20  -1    0.38    0.34
  -7  20  -1    0.16    0.28
   6 -20   1    0.75    0.33
  -6  20  -1    0.82    0.29
  -6  20  -1    0.70    0.30
   5 -20   1    3.12    0.34
  -5  20  -1    3.60    0.38
  -5  20  -1    3.07    0.30
   4 -20   1    9.65    0.53
  -4  20  -1    9.55    0.51
  -4  20  -1    9.88    0.45
   3 -20   1    2.50    0.32
  -3  20  -1    2.57    0.29
  -3  20  -1    2.28    0.21
  -3  20  -1    1.92    0.27
   2 -20   1    0.03    0.20
  -2  20  -1    0.12    0.17
  -2  20  -1    0.03    0.20
  -2  20  -1   -0.02    0.19
   1 -20   1    6.08    0.39
  -1  20  -1    6.17    0.39
  -1  20  -1    5.76    0.34
  -1  20  -1    6.25    0.33
   0 -20   1   -0.13    0.20
   0  20  -1   -0.10    0.15
   0  20  -1   -0.17    0.17
   0  20  -1    0.40    0.21
   0  20  -1   -0.04    0.12
  -1 -20   1    4.58    0.35
   1  20  -1    5.55    0.36
   1  20  -1    5.54    0.29
   1  20  -1    5.63    0.27
   1  20  -1    5.56    0.34
  -2 -20   1    1.45    0.23
   2  20  -1    2.02    0.23
   2  20  -1    1.72    0.22
   2  20  -1    1.35    0.23
  -3 -20   1    0.74    0.24
   3  20  -1    0.42    0.19
   3  20  -1    0.81    0.23
   3  20  -1    0.35    0.22
  -4 -20   1    4.00    0.36
   4  20  -1    3.44    0.32
   4  20  -1    3.37    0.32
   4  20  -1    3.68    0.26
  -5 -20   1    0.25    0.28
   5  20  -1    0.52    0.28
   5  20  -1   -0.18    0.24
  -6 -20   1    0.36    0.30
   6  20  -1    0.42    0.32
   6  20  -1    0.58    0.31
  -7 -20   1    1.55    0.36
   7  20  -1    0.92    0.35
   7  20  -1    1.38    0.38
   8 -19   1    0.77    0.37
  -8  19  -1    0.50    0.30
  -8  19  -1   -0.04    0.35
   7 -19   1    1.24    0.36
  -7  19  -1    1.89    0.38
  -7  19  -1    1.65    0.30
   6 -19   1    7.24    0.54
  -6  19  -1    7.35    0.47
  -6  19  -1    8.12    0.55
   5 -19   1    1.11    0.31
  -5  19  -1    0.85    0.30
  -5  19  -1    1.02    0.26
   4 -19   1   -0.18    0.26
  -4  19  -1    0.03    0.22
  -4  19  -1    0.08    0.22
   3 -19   1    0.16    0.23
  -3  19  -1    0.04    0.15
  -3  19  -1    0.26    0.22
  -3  19  -1    0.08    0.22
   2 -19   1    7.01    0.41
  -2  19  -1    7.78    0.33
  -2  19  -1    7.17    0.38
   1 -19   1    0.93    0.22
  -1  19  -1    1.35    0.21
  -1  19  -1    0.94    0.19
  -1  19  -1    0.82    0.19
   0 -19   1    1.07    0.22
   0  19  -1    0.62    0.17
   0  19  -1    0.54    0.13
   0  19  -1    0.24    0.19
   0  19  -1    0.44    0.16
  -1 -19   1    2.68    0.26
   1  19  -1    2.40    0.18
   1  19  -1    2.26    0.24
   1  19  -1    2.29    0.20
   1  19  -1    2.43    0.24
  -2 -19   1    3.31    0.27
   2  19  -1    4.00    0.31
   2  19  -1    3.89    0.30
   2  19  -1    3.70    0.29
  -3 -19   1    0.83    0.22
   3  19  -1    1.49    0.20
   3  19  -1    1.22    0.25
   3  19  -1    1.27    0.24
  -4 -19   1   -0.01    0.23
   4  19  -1    0.10    0.17
   4  19  -1    0.31    0.24
   4  19  -1   -0.18    0.24
  -5 -19   1    0.70    0.25
   5  19  -1   -0.03    0.26
   5  19  -1    0.08    0.26
  -6 -19   1    0.10    0.25
   6  19  -1    0.64    0.31
   6  19  -1    0.90    0.31
  -7 -19   1    4.56    0.41
   7  19  -1    5.74    0.48
   7  19  -1    4.89    0.43
  -8 -19   1    9.98    0.64
   8  19  -1    9.24    0.60
   8  19  -1   10.58    0.68
   8 -18   1   -0.33    0.34
  -8  18  -1   -0.16    0.35
  -8  18  -1    0.00    0.27
   7 -18   1    0.76    0.33
  -7  18  -1    0.44    0.27
  -7  18  -1    1.07    0.34
   6 -18   1    1.85    0.33
  -6  18  -1    1.54    0.33
  -6  18  -1    1.90    0.30
   5 -18   1    0.97    0.31
  -5  18  -1    1.10    0.26
  -5  18  -1    0.71    0.26
   4 -18   1    3.52    0.34
  -4  18  -1    2.59    0.28
  -4  18  -1    3.17    0.30
  -4  18  -1    3.35    0.24
   3 -18   1    0.84    0.24
  -3  18  -1    0.85    0.16
  -3  18  -1    0.55    0.24
  -3  18  -1    0.83    0.23
   2 -18   1    0.24    0.20
  -2  18  -1   -0.03    0.18
  -2  18  -1    0.31    0.19
  -2  18  -1   -0.08    0.14
   1 -18   1    1.09    0.20
  -1  18  -1    1.16    0.19
  -1  18  -1    0.92    0.21
  -1  18  -1    1.30    0.19
  -1  18  -1    1.19    0.11
   0 -18   1    0.35    0.17
   0  18  -1    0.15    0.16
   0  18  -1    0.47    0.15
   0  18  -1    0.24    0.18
   0  18  -1    0.42    0.12
  -1 -18   1    1.37    0.22
   1  18  -1    1.01    0.21
   1  18  -1    1.11    0.19
   1  18  -1    1.41    0.17
   1  18  -1    1.59    0.15
  -2 -18   1    5.32    0.34
  -2 -18   1    4.92    0.21
   2  18  -1    4.81    0.19
   2  18  -1    5.20    0.35
   2  18  -1    4.50    0.29
   2  18  -1    4.99    0.30
  -3 -18   1    2.61    0.26
   3  18  -1    3.51    0.28
   3  18  -1    3.15    0.29
   3  18  -1    3.30    0.23
  -4 -18   1   -0.11    0.19
   4  18  -1    0.29    0.23
   4  18  -1    0.08    0.23
   4  18  -1    0.08    0.15
  -5 -18   1    3.50    0.34
   5  18  -1    3.83    0.36
   5  18  -1    3.44    0.34
  -6 -18   1    1.12    0.28
   6  18  -1    1.23    0.28
   6  18  -1    1.20    0.34
  -7 -18   1   10.60    0.59
   7  18  -1   10.01    0.63
   7  18  -1    9.62    0.57
  -8 -18   1    0.07    0.33
   8  18  -1    0.14    0.36
   8  18  -1    0.41    0.32
   8 -17   1    0.72    0.34
  -8  17  -1    0.65    0.29
  -8  17  -1    0.34    0.36
   7 -17   1   15.28    0.64
  -7  17  -1   15.42    0.62
  -7  17  -1   15.34    0.65
   6 -17   1    5.90    0.43
  -6  17  -1    5.03    0.40
  -6  17  -1    6.43    0.44
   5 -17   1    2.31    0.32
  -5  17  -1    2.46    0.31
  -5  17  -1    2.21    0.27
   4 -17   1   26.24    0.75
  -4  17  -1   24.21    0.69
  -4  17  -1   25.60    0.61
  -4  17  -1   26.38    0.73
   3 -17   1    2.74    0.29
  -3  17  -1    2.55    0.27
  -3  17  -1    1.82    0.22
  -3  17  -1    2.56    0.20
   2 -17   1    1.29    0.23
  -2  17  -1    1.46    0.22
  -2  17  -1    1.32    0.21
  -2  17  -1    1.23    0.17
   1 -17   1   -0.15    0.18
  -1  17  -1    0.11    0.16
  -1  17  -1    0.10    0.15
  -1  17  -1    0.07    0.08
  -1  17  -1    0.08    0.19
   0 -17   1   -0.07    0.17
   0  17  -1   -0.17    0.15
   0  17  -1    0.03    0.11
   0  17  -1    0.01    0.16
   0  17  -1    0.03    0.14
  -1 -17   1    0.81    0.18
   1  17  -1    0.75    0.17
   1  17  -1    1.14    0.16
   1  17  -1    1.36    0.19
   1  17  -1    1.13    0.14
  -2 -17   1    0.08    0.09
  -2 -17   1   -0.04    0.17
   2  17  -1    0.14    0.16
   2  17  -1    0.22    0.18
   2  17  -1    0.00    0.09
   2  17  -1    0.21    0.16
  -3 -17   1    0.84    0.20
   3  17  -1    0.35    0.20
   3  17  -1    0.79    0.17
   3  17  -1    0.77    0.23
  -4 -17   1    2.48    0.28
   4  17  -1    2.96    0.30
   4  17  -1    3.49    0.26
   4  17  -1    3.30    0.31
  -5 -17   1   10.27    0.50
   5  17  -1   10.47    0.42
   5  17  -1   11.13    0.53
   5  17  -1   10.22    0.51
  -6 -17   1    6.78    0.45
   6  17  -1    7.48    0.53
   6  17  -1    6.69    0.48
  -7 -17   1    2.54    0.34
   7  17  -1    2.47    0.35
   7  17  -1    3.11    0.38
  -8 -17   1    0.10    0.32
   8  17  -1   -0.43    0.34
   8  17  -1    0.14    0.31
   8 -16   1    1.15    0.34
  -8  16  -1    1.78    0.38
  -8  16  -1    1.01    0.29
   7 -16   1    1.56    0.35
  -7  16  -1    1.87    0.30
  -7  16  -1    1.66    0.34
   6 -16   1   11.80    0.56
  -6  16  -1   12.22    0.58
  -6  16  -1   10.92    0.50
   5 -16   1    2.64    0.31
  -5  16  -1    2.92    0.33
  -5  16  -1    3.00    0.28
   4 -16   1    1.57    0.25
  -4  16  -1    1.43    0.16
  -4  16  -1    1.34    0.23
  -4  16  -1    1.43    0.25
   3 -16   1   -0.08    0.18
  -3  16  -1    0.00    0.16
  -3  16  -1    0.15    0.13
  -3  16  -1    0.12    0.18
   2 -16   1    2.28    0.25
  -2  16  -1    2.15    0.23
  -2  16  -1    2.07    0.22
  -2  16  -1    2.33    0.19
   1 -16   1    0.98    0.19
  -1  16  -1    0.80    0.17
  -1  16  -1    1.12    0.10
  -1  16  -1    0.81    0.18
  -1  16  -1    1.03    0.17
   0 -16   1    1.91    0.22
   0  16  -1    1.43    0.19
   0  16  -1    1.66    0.17
   0  16  -1    1.71    0.14
   0  16  -1    1.08    0.18
  -1 -16   1    2.94    0.25
   1  16  -1    2.72    0.22
   1  16  -1    3.05    0.23
   1  16  -1    3.58    0.25
   1  16  -1    2.81    0.19
  -2 -16   1    4.13    0.30
  -2 -16   1    4.39    0.17
   2  16  -1    4.04    0.26
   2  16  -1    4.12    0.17
   2  16  -1    4.64    0.30
   2  16  -1    3.60    0.28
  -3 -16   1    1.23    0.22
   3  16  -1    1.37    0.23
   3  16  -1    1.45    0.22
   3  16  -1    1.12    0.17
  -4 -16   1    0.32    0.21
   4  16  -1   -0.17    0.14
   4  16  -1   -0.09    0.22
   4  16  -1    0.15    0.22
  -5 -16   1    0.31    0.22
   5  16  -1    0.29    0.15
   5  16  -1    0.65    0.26
   5  16  -1    0.39    0.25
  -6 -16   1    0.30    0.27
   6  16  -1    0.52    0.29
   6  16  -1   -0.06    0.26
  -7 -16   1    2.34    0.36
   7  16  -1    2.65    0.35
   7  16  -1    2.63    0.38
  -8 -16   1    1.39    0.36
   8  16  -1    1.57    0.39
   8  16  -1    0.98    0.31
   8 -15   1    0.29    0.32
  -8  15  -1    0.63    0.26
  -8  15  -1    0.94    0.35
   7 -15   1    0.55    0.28
  -7  15  -1    0.64    0.25
  -7  15  -1    2.04    0.35
   6 -15   1    0.63    0.25
  -6  15  -1    0.54    0.28
  -6  15  -1    0.36    0.22
   5 -15   1   10.16    0.49
  -5  15  -1   10.11    0.50
  -5  15  -1    9.55    0.43
   4 -15   1    0.71    0.23
  -4  15  -1    0.37    0.21
  -4  15  -1    0.31    0.19
  -4  15  -1    0.34    0.12
   3 -15   1    6.91    0.38
  -3  15  -1    7.50    0.38
  -3  15  -1    6.96    0.27
  -3  15  -1    5.76    0.32
   2 -15   1    9.49    0.40
  -2  15  -1   10.20    0.33
  -2  15  -1    9.29    0.38
  -2  15  -1   10.00    0.37
   1 -15   1    0.64    0.17
  -1  15  -1    0.93    0.09
  -1  15  -1    0.94    0.16
  -1  15  -1    0.92    0.18
  -1  15  -1    0.71    0.16
   0 -15   1   -0.06    0.16
   0  15  -1    0.10    0.10
   0  15  -1   -0.01    0.15
   0  15  -1    0.09    0.12
   0  15  -1    0.20    0.16
  -1 -15   1    8.99    0.37
   1  15  -1    9.55    0.34
   1  15  -1    9.35    0.37
   1  15  -1    9.16    0.28
   1  15  -1    9.72    0.32
  -2 -15   1   18.93    0.52
  -2 -15   1   18.62    0.55
  -2 -15   1   19.72    0.42
   2  15  -1   19.17    0.55
   2  15  -1   19.13    0.41
   2  15  -1   19.02    0.50
   2  15  -1   18.69    0.53
  -3 -15   1    1.72    0.23
  -3 -15   1    2.16    0.24
   3  15  -1    1.77    0.17
   3  15  -1    1.67    0.23
   3  15  -1    1.66    0.22
  -4 -15   1   -0.26    0.17
   4  15  -1    0.08    0.21
   4  15  -1    0.25    0.21
   4  15  -1    0.04    0.13
  -5 -15   1    3.41    0.33
   5  15  -1    4.46    0.33
   5  15  -1    3.53    0.33
   5  15  -1    3.00    0.21
  -6 -15   1   29.80    0.86
   6  15  -1   30.16    0.84
   6  15  -1   28.33    0.87
  -7 -15   1    1.29    0.32
   7  15  -1    1.11    0.27
   7  15  -1    0.91    0.32
  -8 -15   1    2.33    0.39
   8  15  -1    1.98    0.35
   8  15  -1    2.14    0.40
  -9 -15   1    0.14    0.35
   9  15  -1   -0.25    0.35
   9  15  -1   -0.12    0.29
   9 -14   1    0.58    0.36
  -9  14  -1    0.01    0.35
   8 -14   1    0.43    0.35
  -8  14  -1    0.66    0.25
  -8  14  -1    0.53    0.33
   7 -14   1    0.11    0.29
  -7  14  -1   -0.09    0.22
  -7  14  -1    0.29    0.29
   6 -14   1    0.52    0.26
  -6  14  -1    0.32    0.22
  -6  14  -1    0.10    0.26
   5 -14   1    6.62    0.38
  -5  14  -1    6.02    0.37
  -5  14  -1    5.60    0.38
   4 -14   1    0.14    0.18
  -4  14  -1    0.15    0.19
  -4  14  -1    0.15    0.11
  -4  14  -1    0.19    0.19
   3 -14   1    0.07    0.19
  -3  14  -1    0.25    0.16
  -3  14  -1    0.30    0.19
  -3  14  -1    0.28    0.12
   2 -14   1   14.61    0.46
  -2  14  -1   15.04    0.47
  -2  14  -1   15.19    0.46
  -2  14  -1   15.24    0.41
  -1  14  -1    9.02    0.31
  -1  14  -1    8.61    0.22
  -1  14  -1    8.81    0.35
  -1  14  -1    8.35    0.32
   0 -14   1    0.15    0.14
   0  14  -1    0.13    0.15
   0  14  -1    0.02    0.10
   0  14  -1    0.09    0.16
   0  14  -1    0.06    0.12
  -1 -14   1   -0.14    0.15
  -1 -14   1    0.15    0.12
   1  14  -1    0.02    0.10
   1  14  -1    0.60    0.17
   1  14  -1   -0.02    0.12
   1  14  -1    0.06    0.14
  -2 -14   1   40.89    0.93
  -2 -14   1   41.51    0.80
  -2 -14   1   40.78    0.91
   2  14  -1   40.71    0.93
   2  14  -1   40.84    0.89
   2  14  -1   41.12    0.80
   2  14  -1   39.59    0.90
  -3 -14   1    0.28    0.18
  -3 -14   1    0.29    0.18
   3  14  -1    0.31    0.13
   3  14  -1    0.15    0.17
   3  14  -1    0.32    0.17
  -4 -14   1   12.27    0.47
   4  14  -1   12.69    0.37
   4  14  -1   12.16    0.44
   4  14  -1   11.77    0.47
  -5 -14   1    0.43    0.22
   5  14  -1    0.20    0.13
   5  14  -1   -0.08    0.22
   5  14  -1    0.49    0.25
  -6 -14   1    3.76    0.35
   6  14  -1    3.66    0.33
   6  14  -1    3.42    0.33
  -7 -14   1    6.08    0.45
   7  14  -1    6.41    0.47
   7  14  -1    7.63    0.55
  -8 -14   1    1.34    0.34
   8  14  -1    1.40    0.30
   8  14  -1    1.13    0.36
  -9 -14   1    0.27    0.34
   9  14  -1   -0.10    0.30
   9  14  -1    0.53    0.39
   9 -13   1    0.05    0.35
  -9  13  -1    0.39    0.33
   8 -13   1    0.45    0.29
  -8  13  -1   -0.05    0.31
  -8  13  -1    0.17    0.23
   7 -13   1   12.43    0.60
  -7  13  -1   11.77    0.48
  -7  13  -1   12.53    0.59
   6 -13   1    0.01    0.22
  -6  13  -1   -0.30    0.25
  -6  13  -1    0.01    0.20
   5 -13   1    2.78    0.29
  -5  13  -1    2.89    0.26
  -5  13  -1    3.12    0.32
   4 -13   1    2.01    0.25
  -4  13  -1    2.08    0.15
  -4  13  -1    2.17    0.26
  -4  13  -1    1.76    0.22
   3 -13   1    0.52    0.17
  -3  13  -1    0.56    0.18
  -3  13  -1    0.50    0.12
  -3  13  -1    1.01    0.20
   2 -13   1    3.56    0.28
  -2  13  -1    3.46    0.21
  -2  13  -1    3.51    0.24
  -2  13  -1    3.66    0.24
   1 -13   1   29.40    0.70
  -1  13  -1   28.71    0.66
  -1  13  -1   30.18    0.69
  -1  13  -1   29.01    0.58
  -1  13  -1   28.11    0.67
   0  13  -1    6.15    0.28
   0  13  -1    5.95    0.22
   0  13  -1    5.65    0.29
   0  13  -1    6.05    0.25
  -1 -13   1   17.83    0.46
  -1 -13   1   18.72    0.51
   1  13  -1   18.68    0.43
   1  13  -1   18.38    0.51
   1  13  -1   19.45    0.47
   1  13  -1   18.83    0.48
  -2 -13   1    3.11    0.24
  -2 -13   1    2.88    0.24
  -2 -13   1    2.95    0.13
   2  13  -1    3.11    0.12
   2  13  -1    3.67    0.27
   2  13  -1    2.83    0.22
   2  13  -1    2.86    0.21
  -3 -13   1    0.27    0.16
  -3 -13   1    0.48    0.17
   3  13  -1    0.43    0.19
   3  13  -1    0.40    0.17
   3  13  -1    0.41    0.13
  -4 -13   1    4.59    0.33
  -4 -13   1    4.40    0.35
   4  13  -1    4.97    0.34
   4  13  -1    4.23    0.34
   4  13  -1    4.41    0.24
  -5 -13   1   -0.04    0.21
   5  13  -1   -0.33    0.21
   5  13  -1    0.00    0.23
   5  13  -1    0.04    0.12
  -6 -13   1    0.06    0.25
   6  13  -1    0.00    0.24
   6  13  -1   -0.11    0.22
  -7 -13   1    0.25    0.29
   7  13  -1    0.99    0.29
   7  13  -1    0.84    0.31
  -8 -13   1    3.57    0.40
   8  13  -1    4.66    0.46
   8  13  -1    4.85    0.39
  -9 -13   1    1.22    0.38
   9  13  -1    0.53    0.30
   9  13  -1    0.08    0.38
   9 -12   1   -0.24    0.34
  -9  12  -1    0.62    0.36
   8 -12   1   -0.15    0.32
  -8  12  -1    0.02    0.36
  -8  12  -1    0.05    0.31
   7 -12   1   -0.16    0.27
  -7  12  -1    0.30    0.27
  -7  12  -1    0.04    0.21
   6 -12   1    1.57    0.28
  -6  12  -1    1.61    0.23
  -6  12  -1    1.67    0.29
   5 -12   1    6.99    0.41
  -5  12  -1    6.90    0.27
  -5  12  -1    6.97    0.35
  -5  12  -1    6.53    0.37
   4 -12   1    4.31    0.33
  -4  12  -1    4.09    0.27
  -4  12  -1    4.45    0.34
  -4  12  -1    4.32    0.20
   3 -12   1   20.86    0.58
  -3  12  -1   20.12    0.56
  -3  12  -1   21.02    0.48
  -3  12  -1   21.02    0.56
   2 -12   1    3.68    0.26
  -2  12  -1    3.99    0.21
  -2  12  -1    3.81    0.27
  -2  12  -1    3.86    0.27
   1 -12   1  144.53    2.79
  -1  12  -1  145.30    2.69
  -1  12  -1  138.86    2.77
  -1  12  -1  144.62    2.78
  -1  12  -1  144.75    2.76
   0 -12   1    2.66    0.17
   0 -12   1    2.86    0.21
   0  12  -1    2.68    0.19
   0  12  -1    2.96    0.18
   0  12  -1    2.82    0.20
   0  12  -1    3.01    0.21
  -1 -12   1    1.53    0.15
  -1 -12   1    1.22    0.18
   1  12  -1    1.71    0.19
   1  12  -1    1.44    0.15
   1  12  -1    1.48    0.16
   1  12  -1    1.58    0.12
  -2 -12   1    1.48    0.10
  -2 -12   1    1.32    0.17
  -2 -12   1    1.29    0.17
   2  12  -1    1.25    0.15
   2  12  -1    1.39    0.18
   2  12  -1    1.37    0.09
   2  12  -1    1.38    0.19
  -3 -12   1    0.12    0.17
  -3 -12   1    0.24    0.15
   3  12  -1    0.12    0.15
   3  12  -1    0.06    0.15
   3  12  -1    0.35    0.12
  -4 -12   1   10.47    0.41
  -4 -12   1   11.25    0.42
   4  12  -1   11.49    0.33
   4  12  -1   11.41    0.43
   4  12  -1   11.28    0.44
  -5 -12   1    0.44    0.22
   5  12  -1    0.34    0.12
   5  12  -1    0.12    0.20
   5  12  -1    0.14    0.20
  -6 -12   1    7.33    0.41
   6  12  -1    7.59    0.48
   6  12  -1    7.76    0.43
  -7 -12   1    0.39    0.29
   7  12  -1    0.24    0.27
   7  12  -1    0.18    0.24
  -8 -12   1    0.66    0.32
   8  12  -1    0.16    0.26
   8  12  -1    0.32    0.33
  -9 -12   1    0.83    0.36
   9  12  -1    1.09    0.39
   9  12  -1    0.54    0.30
   9 -11   1    0.34    0.36
  -9  11  -1    0.32    0.33
   8 -11   1    0.20    0.30
  -8  11  -1    0.05    0.28
   7 -11   1    0.51    0.29
  -7  11  -1    0.29    0.27
  -7  11  -1    0.39    0.21
   6 -11   1    6.84    0.45
  -6  11  -1    6.25    0.40
  -6  11  -1    7.08    0.36
   5 -11   1    0.61    0.13
   5 -11   1    0.91    0.24
  -5  11  -1    0.97    0.19
  -5  11  -1    0.95    0.12
  -5  11  -1    0.99    0.25
   4 -11   1    2.87    0.14
   4 -11   1    3.89    0.27
  -4  11  -1    4.00    0.27
  -4  11  -1    4.06    0.31
  -4  11  -1    3.62    0.18
   3 -11   1    7.03    0.31
  -3  11  -1    7.40    0.32
  -3  11  -1    7.51    0.32
  -3  11  -1    7.54    0.24
   2 -11   1   31.95    0.75
  -2  11  -1   33.10    0.69
  -2  11  -1   32.49    0.74
  -2  11  -1   31.37    0.74
   1 -11   1    4.65    0.28
  -1  11  -1    4.99    0.24
  -1  11  -1    4.86    0.14
  -1  11  -1    5.09    0.25
  -1  11  -1    4.41    0.24
   0 -11   1    0.32    0.15
   0 -11   1    0.32    0.10
   0  11  -1    0.26    0.13
   0  11  -1    0.26    0.10
   0  11  -1    0.30    0.12
   0  11  -1    0.30    0.14
  -1 -11   1   11.02    0.36
  -1 -11   1   11.33    0.33
   1  11  -1   10.97    0.35
   1  11  -1   10.63    0.32
   1  11  -1   10.60    0.28
   1  11  -1   11.15    0.34
  -2 -11   1    0.10    0.15
  -2 -11   1    0.05    0.14
  -2 -11   1   -0.03    0.05
   2  11  -1   -0.05    0.05
   2  11  -1    0.05    0.12
   2  11  -1    0.02    0.14
   2  11  -1    0.24    0.16
  -3 -11   1    8.84    0.36
  -3 -11   1    8.17    0.35
   3  11  -1    8.16    0.28
   3  11  -1    9.01    0.34
  -4 -11   1    3.96    0.28
  -4 -11   1    3.70    0.27
   4  11  -1    3.55    0.26
   4  11  -1    3.50    0.20
   4  11  -1    3.36    0.27
  -5 -11   1    0.08    0.20
  -5 -11   1    0.14    0.21
   5  11  -1    0.13    0.20
   5  11  -1    0.12    0.21
   5  11  -1    0.16    0.12
  -6 -11   1    2.39    0.30
   6  11  -1    2.49    0.28
   6  11  -1    2.34    0.29
  -7 -11   1    3.12    0.34
   7  11  -1    3.18    0.31
   7  11  -1    3.51    0.38
  -8 -11   1    1.26    0.32
   8  11  -1    1.00    0.28
   8  11  -1    0.94    0.33
  -9 -11   1   -0.27    0.29
   9  11  -1    0.21    0.36
   9  11  -1    0.18    0.28
   9 -10   1    0.06    0.32
  -9  10  -1    0.36    0.34
  -9  10  -1   -0.04    0.29
   8 -10   1   -0.13    0.30
  -8  10  -1   -0.13    0.28
  -8  10  -1   -0.15    0.29
   7 -10   1    0.48    0.28
  -7  10  -1    0.79    0.20
  -7  10  -1    0.46    0.27
  -7  10  -1    0.43    0.28
   6 -10   1    1.97    0.27
  -6  10  -1    2.58    0.24
  -6  10  -1    2.37    0.28
   5 -10   1    5.76    0.24
   5 -10   1    6.18    0.38
  -5  10  -1    6.98    0.33
  -5  10  -1    5.76    0.22
  -5  10  -1    5.59    0.34
   4 -10   1    0.92    0.18
   4 -10   1    0.80    0.10
  -4  10  -1    0.95    0.10
  -4  10  -1    1.11    0.17
  -4  10  -1    0.72    0.18
   3 -10   1    1.24    0.19
  -3  10  -1    0.69    0.17
  -3  10  -1    0.72    0.18
  -3  10  -1    0.79    0.11
   2 -10   1    5.34    0.26
  -2  10  -1    5.23    0.26
  -2  10  -1    5.07    0.25
  -2  10  -1    5.06    0.20
   1 -10   1   21.85    0.54
  -1  10  -1   21.59    0.50
  -1  10  -1   21.25    0.53
  -1  10  -1   22.12    0.43
  -1  10  -1   21.26    0.52
   0 -10   1    2.29    0.16
   0 -10   1    2.11    0.19
   0  10  -1    2.16    0.18
   0  10  -1    2.35    0.15
   0  10  -1    2.03    0.16
   0  10  -1    2.07    0.16
  -1 -10   1    3.16    0.20
  -1 -10   1    3.07    0.20
   1  10  -1    2.89    0.21
   1  10  -1    2.91    0.15
   1  10  -1    2.68    0.20
   1  10  -1    2.66    0.21
  -2 -10   1    0.01    0.14
  -2 -10   1    0.06    0.13
   2  10  -1    0.12    0.16
   2  10  -1    0.07    0.11
   2  10  -1    0.10    0.15
  -3 -10   1   14.29    0.44
  -3 -10   1   14.39    0.45
   3  10  -1   13.71    0.42
   3  10  -1   13.89    0.36
   3  10  -1   14.21    0.45
  -4 -10   1   11.76    0.41
  -4 -10   1   12.13    0.42
   4  10  -1   12.07    0.33
   4  10  -1   12.23    0.45
   4  10  -1   11.79    0.42
  -5 -10   1    0.01    0.19
  -5 -10   1   -0.18    0.19
   5  10  -1    0.08    0.11
   5  10  -1   -0.09    0.20
   5  10  -1    0.13    0.19
  -6 -10   1    0.80    0.25
   6  10  -1    1.04    0.27
   6  10  -1    1.23    0.25
  -7 -10   1    0.12    0.27
   7  10  -1   -0.25    0.28
   7  10  -1   -0.65    0.21
  -8 -10   1    0.42    0.31
   8  10  -1    0.45    0.33
   8  10  -1    0.58    0.27
  -9 -10   1    0.40    0.30
   9  10  -1    0.83    0.29
   9  10  -1   -0.14    0.35
   9  -9   1   -0.13    0.32
  -9   9  -1   -0.14    0.32
  -9   9  -1    0.08    0.31
   8  -9   1    0.63    0.31
  -8   9  -1    0.74    0.32
  -8   9  -1    0.13    0.28
   7  -9   1    7.34    0.48
  -7   9  -1    7.30    0.46
  -7   9  -1    7.11    0.47
  -7   9  -1    5.74    0.33
   6  -9   1   16.47    0.58
   6  -9   1   15.81    0.45
  -6   9  -1   16.60    0.49
  -6   9  -1   15.02    0.56
  -6   9  -1   15.28    0.54
   5  -9   1    1.47    0.22
   5  -9   1    2.05    0.16
  -5   9  -1    2.33    0.16
  -5   9  -1    1.68    0.22
  -5   9  -1    2.00    0.25
  -5   9  -1    2.07    0.20
   4  -9   1    4.72    0.31
   4  -9   1    4.01    0.18
  -4   9  -1    3.80    0.27
  -4   9  -1    4.46    0.26
  -4   9  -1    4.27    0.17
   3  -9   1   58.03    1.22
   3  -9   1   57.72    1.11
  -3   9  -1   59.50    1.21
  -3   9  -1   58.26    1.23
  -3   9  -1   58.28    1.14
   2  -9   1    0.35    0.14
  -2   9  -1    0.80    0.15
  -2   9  -1    0.69    0.17
  -2   9  -1    0.59    0.10
   1  -9   1   27.17    0.63
  -1   9  -1   27.32    0.62
  -1   9  -1   27.87    0.53
  -1   9  -1   27.61    0.53
  -1   9  -1   26.99    0.59
  -1   9  -1   26.47    0.62
   0  -9   1   70.47    1.34
   0  -9   1   68.74    1.38
   0   9  -1   69.01    1.34
   0   9  -1   69.42    1.37
   0   9  -1   68.81    1.35
   0   9  -1   69.38    1.37
  -1  -9   1    5.27    0.24
  -1  -9   1    5.26    0.26
   1   9  -1    5.33    0.18
   1   9  -1    5.56    0.24
   1   9  -1    5.40    0.24
   1   9  -1    5.57    0.23
  -2  -9   1    1.42    0.18
  -2  -9   1    1.19    0.16
   2   9  -1    1.38    0.17
   2   9  -1    1.53    0.17
   2   9  -1    1.44    0.14
  -3  -9   1   12.24    0.41
  -3  -9   1   12.33    0.40
   3   9  -1   11.48    0.39
   3   9  -1   12.32    0.41
   3   9  -1   12.24    0.33
  -4  -9   1   24.24    0.65
  -4  -9   1   24.23    0.63
   4   9  -1   23.81    0.65
   4   9  -1   24.34    0.54
   4   9  -1   23.75    0.62
  -5  -9   1    6.41    0.34
  -5  -9   1    6.11    0.35
   5   9  -1    6.47    0.34
   5   9  -1    5.86    0.35
   5   9  -1    6.54    0.23
  -6  -9   1    3.60    0.32
   6   9  -1    4.10    0.35
   6   9  -1    3.89    0.29
  -7  -9   1    0.25    0.27
   7   9  -1   -0.02    0.27
   7   9  -1    0.35    0.24
  -8  -9   1    0.33    0.30
   8   9  -1    0.48    0.25
   8   9  -1    1.04    0.32
  -9  -9   1   -0.03    0.32
   9   9  -1   -0.06    0.34
   9   9  -1    0.05    0.27
   9  -8   1    0.13    0.33
  -9   8  -1    0.06    0.31
  -9   8  -1   -0.12    0.33
   8  -8   1    0.13    0.26
  -8   8  -1    0.20    0.28
  -8   8  -1    0.68    0.30
   7  -8   1    3.48    0.40
   7  -8   1    4.51    0.38
  -7   8  -1    3.17    0.32
  -7   8  -1    4.15    0.31
  -7   8  -1    3.71    0.35
   6  -8   1   -0.16    0.15
   6  -8   1    0.13    0.23
  -6   8  -1   -0.20    0.21
  -6   8  -1    0.24    0.21
  -6   8  -1    0.02    0.16
   5  -8   1    0.16    0.21
   5  -8   1    0.24    0.13
  -5   8  -1    0.35    0.16
  -5   8  -1    0.44    0.21
  -5   8  -1    0.78    0.21
  -5   8  -1    0.60    0.10
   4  -8   1    1.10    0.12
   4  -8   1    1.15    0.18
  -4   8  -1    1.08    0.15
  -4   8  -1    0.76    0.17
  -4   8  -1    1.06    0.10
  -4   8  -1    1.29    0.21
   3  -8   1   13.76    0.32
   3  -8   1   14.56    0.43
  -3   8  -1   14.46    0.33
  -3   8  -1   14.26    0.44
  -3   8  -1   14.27    0.40
   2  -8   1   64.35    1.31
  -2   8  -1   64.52    1.25
  -2   8  -1   63.75    1.31
  -2   8  -1   64.36    1.29
   1  -8   1    3.86    0.11
   1  -8   1    3.92    0.22
  -1   8  -1    3.57    0.23
  -1   8  -1    3.71    0.10
  -1   8  -1    3.89    0.23
  -1   8  -1    3.99    0.19
  -1   8  -1    3.79    0.11
   0  -8   1   29.01    0.59
   0  -8   1   28.46    0.64
   0   8  -1   29.24    0.63
   0   8  -1   28.93    0.59
   0   8  -1   29.26    0.63
   0   8  -1   29.26    0.61
  -1  -8   1   34.55    0.75
  -1  -8   1   35.38    0.73
   1   8  -1   34.66    0.74
   1   8  -1   33.96    0.68
   1   8  -1   34.80    0.73
   1   8  -1   34.46    0.72
  -2  -8   1    4.80    0.26
  -2  -8   1    5.18    0.27
   2   8  -1    5.01    0.26
   2   8  -1    5.09    0.24
   2   8  -1    5.13    0.21
  -3  -8   1   10.32    0.38
   3   8  -1   10.31    0.36
   3   8  -1   10.73    0.36
   3   8  -1   10.45    0.29
  -4  -8   1    0.56    0.17
  -4  -8   1    0.78    0.06
  -4  -8   1    0.74    0.20
   4   8  -1    0.78    0.20
   4   8  -1    1.07    0.11
   4   8  -1    0.73    0.17
   4   8  -1    0.79    0.06
  -5  -8   1    0.09    0.16
  -5  -8   1    0.15    0.20
  -5  -8   1    0.13    0.08
   5   8  -1    0.46    0.18
   5   8  -1    0.27    0.19
   5   8  -1    0.48    0.11
  -6  -8   1    4.80    0.35
   6   8  -1    4.36    0.34
   6   8  -1    4.09    0.32
  -7  -8   1    3.70    0.35
   7   8  -1    3.52    0.35
   7   8  -1    3.85    0.31
  -8  -8   1   -0.13    0.29
   8   8  -1    0.23    0.24
   8   8  -1    0.19    0.29
  -9  -8   1   -0.58    0.31
   9   8  -1    0.24    0.29
   9   8  -1    0.16    0.33
   9  -7   1   -0.30    0.30
  -9   7  -1   -0.18    0.29
  -9   7  -1   -0.07    0.29
   8  -7   1    0.22    0.29
  -8   7  -1   -0.23    0.24
  -8   7  -1    0.20    0.25
   7  -7   1   14.60    0.58
   7  -7   1   12.07    0.46
  -7   7  -1   13.83    0.45
  -7   7  -1   13.00    0.54
  -7   7  -1   13.50    0.53
   6  -7   1    1.67    0.20
   6  -7   1    1.75    0.27
  -6   7  -1    1.86    0.26
  -6   7  -1    1.69    0.20
  -6   7  -1    1.75    0.26
   5  -7   1    0.55    0.19
   5  -7   1    0.39    0.13
   5  -7   1    0.45    0.11
  -5   7  -1    0.53    0.20
  -5   7  -1    0.27    0.18
  -5   7  -1    0.59    0.10
  -5   7  -1    0.52    0.15
   4  -7   1    4.30    0.21
   4  -7   1    4.50    0.30
  -4   7  -1    4.38    0.27
  -4   7  -1    4.46    0.18
  -4   7  -1    4.51    0.25
  -4   7  -1    4.89    0.30
   3  -7   1    4.82    0.28
   3  -7   1    4.55    0.17
  -3   7  -1    4.59    0.24
  -3   7  -1    4.55    0.29
  -3   7  -1    4.72    0.17
   2  -7   1    2.63    0.10
   2  -7   1    2.01    0.10
   2  -7   1    3.21    0.20
  -2   7  -1    2.29    0.18
  -2   7  -1    2.12    0.15
  -2   7  -1    2.62    0.14
   1  -7   1    1.16    0.15
  -1   7  -1    1.41    0.12
  -1   7  -1    1.23    0.15
  -1   7  -1    1.29    0.14
   0  -7   1  295.95    5.76
   0  -7   1  299.28    5.64
   0   7  -1  298.88    5.62
   0   7  -1  296.58    5.68
   0   7  -1  293.49    5.69
   0   7  -1  299.16    5.59
  -1  -7   1    9.87    0.31
  -1  -7   1   10.14    0.29
   1   7  -1    9.56    0.29
   1   7  -1    9.82    0.22
   1   7  -1   10.00    0.28
   1   7  -1    9.73    0.30
  -2  -7   1    7.30    0.28
   2   7  -1    7.57    0.30
   2   7  -1    7.80    0.29
   2   7  -1    7.74    0.24
  -3  -7   1   14.40    0.42
  -3  -7   1   14.64    0.42
   3   7  -1   13.75    0.41
   3   7  -1   14.30    0.35
   3   7  -1   14.61    0.44
  -4  -7   1    0.46    0.19
  -4  -7   1    0.52    0.16
  -4  -7   1    0.42    0.07
   4   7  -1    0.72    0.10
   4   7  -1    0.51    0.19
   4   7  -1    0.73    0.17
  -5  -7   1    0.33    0.19
  -5  -7   1    0.22    0.09
  -5  -7   1    0.59    0.21
   5   7  -1    0.25    0.10
   5   7  -1    0.50    0.17
   5   7  -1    0.35    0.21
  -6  -7   1    0.95    0.24
   6   7  -1    1.11    0.21
   6   7  -1    1.51    0.27
   6   7  -1    1.00    0.13
  -7  -7   1    1.17    0.29
   7   7  -1    1.34    0.30
   7   7  -1    1.21    0.24
  -8  -7   1   -0.13    0.27
   8   7  -1   -0.22    0.22
   8   7  -1    0.29    0.29
  -9  -7   1   -0.35    0.29
   9   7  -1   -0.33    0.32
   9  -6   1   -0.31    0.31
  -9   6  -1    0.05    0.29
  -9   6  -1    0.26    0.32
   8  -6   1   -0.15    0.23
   8  -6   1    0.35    0.30
  -8   6  -1    0.15    0.28
  -8   6  -1    0.56    0.27
   7  -6   1    0.14    0.19
   7  -6   1    0.84    0.27
  -7   6  -1    0.89    0.25
  -7   6  -1    0.49    0.18
  -7   6  -1    0.39    0.25
   6  -6   1    0.27    0.16
   6  -6   1    0.96    0.25
   6  -6   1    1.01    0.14
  -6   6  -1    1.01    0.24
  -6   6  -1    1.21    0.18
  -6   6  -1    0.60    0.22
  -6   6  -1    0.82    0.13
   5  -6   1    1.24    0.20
   5  -6   1    1.29    0.16
   5  -6   1    1.74    0.13
  -5   6  -1    1.54    0.22
  -5   6  -1    1.29    0.20
  -5   6  -1    1.59    0.16
  -5   6  -1    1.37    0.12
   4  -6   1    0.88    0.19
   4  -6   1    0.79    0.12
  -4   6  -1    0.91    0.14
  -4   6  -1    1.01    0.18
  -4   6  -1    1.04    0.10
  -4   6  -1    0.82    0.19
   3  -6   1   23.10    0.50
   3  -6   1   23.28    0.58
  -3   6  -1   23.39    0.58
  -3   6  -1   23.52    0.57
  -3   6  -1   22.64    0.48
  -3   6  -1   23.72    0.54
   2  -6   1    8.08    0.20
   2  -6   1    8.58    0.31
  -2   6  -1    8.39    0.28
  -2   6  -1    8.66    0.29
  -2   6  -1    8.56    0.22
   1  -6   1    0.98    0.14
  -1   6  -1    0.98    0.14
  -1   6  -1    1.04    0.10
  -1   6  -1    1.07    0.14
   0  -6   1   14.84    0.33
   0  -6   1   14.99    0.37
   0   6  -1   14.50    0.34
   0   6  -1   14.70    0.33
   0   6  -1   14.94    0.35
   0   6  -1   15.28    0.36
  -1  -6   1   68.97    1.35
  -1  -6   1   68.76    1.36
  -1  -6   1   68.78    1.31
   1   6  -1   68.32    1.35
   1   6  -1   69.87    1.34
   1   6  -1   70.51    1.35
   1   6  -1   68.99    1.30
  -2  -6   1    9.80    0.32
  -2  -6   1    9.34    0.31
   2   6  -1   10.13    0.27
   2   6  -1   10.08    0.33
   2   6  -1   10.44    0.31
  -3  -6   1    5.05    0.29
  -3  -6   1    4.36    0.13
  -3  -6   1    4.31    0.26
   3   6  -1    4.61    0.17
   3   6  -1    4.62    0.29
   3   6  -1    4.22    0.25
  -4  -6   1    1.75    0.19
  -4  -6   1    2.21    0.22
  -4  -6   1    2.19    0.13
   4   6  -1    1.91    0.19
   4   6  -1    1.95    0.21
   4   6  -1    2.12    0.13
  -5  -6   1    4.05    0.33
  -5  -6   1    4.36    0.29
  -5  -6   1    4.21    0.19
   5   6  -1    4.48    0.19
   5   6  -1    4.45    0.30
   5   6  -1    4.67    0.28
  -6  -6   1    3.02    0.21
  -6  -6   1    2.99    0.29
   6   6  -1    3.04    0.25
   6   6  -1    2.60    0.19
   6   6  -1    2.40    0.29
  -7  -6   1    3.82    0.33
   7   6  -1    5.02    0.36
   7   6  -1    5.08    0.39
  -8  -6   1    4.62    0.39
   8   6  -1    5.22    0.37
   8   6  -1    3.93    0.38
  -9  -6   1    0.69    0.33
   9   6  -1   -0.07    0.32
 -10  -6   1    0.13    0.36
  10   6  -1   -0.03    0.34
  10  -5   1    0.17    0.35
 -10   5  -1   -0.32    0.32
   9  -5   1    0.12    0.33
  -9   5  -1    0.51    0.29
  -9   5  -1    0.81    0.34
   8  -5   1    1.31    0.25
   8  -5   1    1.40    0.33
  -8   5  -1    1.67    0.33
  -8   5  -1    1.78    0.30
   7  -5   1    4.49    0.37
   7  -5   1    4.51    0.30
  -7   5  -1    4.78    0.28
  -7   5  -1    4.10    0.33
  -7   5  -1    4.82    0.36
   6  -5   1    0.52    0.17
   6  -5   1    0.93    0.14
   6  -5   1    0.78    0.24
  -6   5  -1    0.56    0.16
  -6   5  -1    0.58    0.22
  -6   5  -1    0.54    0.13
  -6   5  -1    0.71    0.21
   5  -5   1    2.50    0.19
   5  -5   1    2.83    0.25
   5  -5   1    2.59    0.17
  -5   5  -1    2.58    0.17
  -5   5  -1    2.85    0.24
  -5   5  -1    2.85    0.25
  -5   5  -1    2.84    0.22
   4  -5   1    7.32    0.27
   4  -5   1    7.57    0.23
   4  -5   1    7.47    0.32
  -4   5  -1    8.02    0.34
  -4   5  -1    7.57    0.22
  -4   5  -1    7.64    0.31
  -4   5  -1    7.92    0.28
   3  -5   1   16.97    0.40
   3  -5   1   17.18    0.47
  -3   5  -1   16.91    0.46
  -3   5  -1   16.91    0.37
  -3   5  -1   17.16    0.42
  -3   5  -1   17.78    0.46
   2  -5   1   12.54    0.35
   2  -5   1   12.97    0.29
  -2   5  -1   12.80    0.28
  -2   5  -1   12.27    0.35
  -2   5  -1   12.99    0.34
  -2   5  -1   12.53    0.37
   1  -5   1   27.15    0.59
  -1   5  -1   27.44    0.59
  -1   5  -1   27.22    0.55
  -1   5  -1   27.00    0.58
   0  -5   1    1.82    0.12
   0   5  -1    2.10    0.13
   0   5  -1    2.03    0.15
   0   5  -1    1.82    0.13
  -1  -5   1   47.04    0.95
  -1  -5   1   47.95    0.95
  -1  -5   1   48.14    0.89
   1   5  -1   47.22    0.89
   1   5  -1   46.84    0.95
   1   5  -1   47.25    0.95
   1   5  -1   48.32    0.93
  -2  -5   1   79.86    1.58
  -2  -5   1   80.81    1.57
   2   5  -1   78.67    1.57
   2   5  -1   80.16    1.56
   2   5  -1   80.40    1.53
  -3  -5   1   33.18    0.75
  -3  -5   1   32.78    0.72
  -3  -5   1   32.70    0.64
   3   5  -1   32.46    0.72
   3   5  -1   32.23    0.66
   3   5  -1   32.73    0.74
  -4  -5   1    3.28    0.16
  -4  -5   1    3.44    0.26
  -4  -5   1    3.35    0.24
   4   5  -1    3.04    0.16
   4   5  -1    3.02    0.23
   4   5  -1    3.42    0.24
  -5  -5   1    9.84    0.38
  -5  -5   1    9.56    0.29
  -5  -5   1   10.65    0.42
   5   5  -1    9.59    0.35
   5   5  -1    9.50    0.41
   5   5  -1    9.67    0.28
  -6  -5   1    0.28    0.20
  -6  -5   1    0.18    0.13
   6   5  -1    0.33    0.22
   6   5  -1    0.20    0.17
   6   5  -1    0.02    0.11
  -7  -5   1    3.18    0.33
   7   5  -1    3.72    0.28
   7   5  -1    3.02    0.33
  -8  -5   1    0.75    0.29
   8   5  -1    0.35    0.28
   8   5  -1    0.86    0.23
  -9  -5   1    1.61    0.36
   9   5  -1    1.26    0.36
 -10  -5   1    0.21    0.34
  10   5  -1    0.18    0.34
  10  -4   1    0.50    0.36
 -10   4  -1    0.35    0.35
   9  -4   1    0.30    0.34
   9  -4   1    0.93    0.33
  -9   4  -1    0.89    0.33
  -9   4  -1    0.35    0.28
   8  -4   1    0.10    0.29
   8  -4   1    0.41    0.23
  -8   4  -1    0.36    0.25
  -8   4  -1   -0.08    0.27
   7  -4   1   -0.30    0.18
   7  -4   1    0.00    0.22
  -7   4  -1    0.04    0.22
  -7   4  -1    0.57    0.25
  -7   4  -1   -0.13    0.15
   6  -4   1    9.06    0.37
   6  -4   1    8.91    0.30
   6  -4   1    8.42    0.44
  -6   4  -1    9.27    0.40
  -6   4  -1    8.77    0.32
  -6   4  -1    8.52    0.40
   5  -4   1    2.00    0.18
   5  -4   1    1.81    0.14
   5  -4   1    2.16    0.24
  -5   4  -1    1.93    0.21
  -5   4  -1    2.06    0.24
  -5   4  -1    2.50    0.17
  -5   4  -1    2.30    0.15
   4  -4   1    3.11    0.16
   4  -4   1    2.43    0.20
   4  -4   1    3.10    0.24
  -4   4  -1    3.37    0.26
  -4   4  -1    2.87    0.18
  -4   4  -1    3.29    0.23
  -4   4  -1    3.05    0.16
   3  -4   1   56.62    1.12
   3  -4   1   56.88    1.16
  -3   4  -1   54.77    1.16
  -3   4  -1   57.30    1.09
  -3   4  -1   57.00    1.16
  -3   4  -1   56.90    1.13
   2  -4   1    0.42    0.09
   2  -4   1    0.60    0.13
  -2   4  -1    0.48    0.15
  -2   4  -1    0.40    0.12
  -2   4  -1    0.39    0.11
  -2   4  -1    0.41    0.07
   1  -4   1    2.35    0.14
   1  -4   1    2.34    0.08
  -1   4  -1    2.31    0.08
  -1   4  -1    2.09    0.14
  -1   4  -1    2.07    0.11
  -1   4  -1    2.46    0.14
   0  -4   1    0.32    0.06
   0  -4   1    0.33    0.09
   0   4  -1    0.34    0.07
   0   4  -1    0.35    0.08
   0   4  -1    0.27    0.08
  -1  -4   1    0.56    0.10
  -1  -4   1    0.65    0.11
   1   4  -1    0.70    0.09
   1   4  -1    0.65    0.11
   1   4  -1    0.58    0.12
  -2  -4   1   48.93    1.00
  -2  -4   1   49.23    0.99
  -2  -4   1   49.17    0.93
   2   4  -1   48.90    0.95
   2   4  -1   48.94    1.00
   2   4  -1   49.21    0.99
   2   4  -1   47.63    0.92
  -3  -4   1    3.94    0.25
  -3  -4   1    3.22    0.15
  -3  -4   1    3.20    0.26
   3   4  -1    3.23    0.15
   3   4  -1    3.76    0.26
   3   4  -1    3.26    0.22
  -4  -4   1   17.15    0.40
  -4  -4   1   17.51    0.48
  -4  -4   1   16.48    0.49
   4   4  -1   17.05    0.45
   4   4  -1   16.72    0.49
   4   4  -1   16.64    0.39
  -5  -4   1    4.81    0.32
  -5  -4   1    4.01    0.32
  -5  -4   1    4.29    0.21
   5   4  -1    4.71    0.20
   5   4  -1    4.77    0.26
   5   4  -1    3.87    0.32
  -6  -4   1    2.71    0.20
  -6  -4   1    2.66    0.28
   6   4  -1    2.60    0.22
   6   4  -1    2.37    0.16
   6   4  -1    2.48    0.27
  -7  -4   1    0.01    0.17
  -7  -4   1   -0.21    0.24
   7   4  -1   -0.42    0.22
   7   4  -1    0.00    0.18
  -8  -4   1    0.07    0.28
   8   4  -1    0.26    0.21
   8   4  -1   -0.06    0.27
  -9  -4   1   -0.35    0.26
   9   4  -1    0.54    0.33
 -10  -4   1    0.53    0.36
  10   4  -1   -0.13    0.32
  10  -3   1    0.62    0.36
 -10   3  -1    0.71    0.37
   9  -3   1    1.06    0.27
   9  -3   1    0.87    0.30
  -9   3  -1    0.62    0.32
  -9   3  -1    1.03    0.30
   8  -3   1    3.11    0.30
   8  -3   1    2.29    0.31
  -8   3  -1    2.52    0.33
  -8   3  -1    2.98    0.31
   7  -3   1    0.12    0.26
   7  -3   1   -0.16    0.19
  -7   3  -1    0.15    0.21
  -7   3  -1   -0.34    0.24
   6  -3   1    4.44    0.34
   6  -3   1    4.32    0.24
   6  -3   1    4.95    0.31
  -6   3  -1    4.71    0.25
  -6   3  -1    5.09    0.33
  -6   3  -1    4.50    0.36
   5  -3   1   13.77    0.36
   5  -3   1   13.73    0.41
   5  -3   1   14.00    0.47
  -5   3  -1   13.28    0.43
  -5   3  -1   12.94    0.44
  -5   3  -1   13.44    0.37
  -5   3  -1   13.31    0.35
   4  -3   1    7.81    0.24
   4  -3   1    7.56    0.34
   4  -3   1    7.46    0.27
  -4   3  -1    7.67    0.25
  -4   3  -1    7.70    0.34
  -4   3  -1    7.70    0.23
  -4   3  -1    8.04    0.31
   3  -3   1    6.30    0.23
   3  -3   1    6.53    0.29
   3  -3   1    6.48    0.19
  -3   3  -1    6.40    0.28
  -3   3  -1    6.38    0.27
  -3   3  -1    6.03    0.19
  -3   3  -1    6.34    0.22
   2  -3   1   14.00    0.33
   2  -3   1   14.53    0.38
  -2   3  -1   14.41    0.37
  -2   3  -1   14.13    0.30
  -2   3  -1   13.99    0.37
  -2   3  -1   13.82    0.33
   1  -3   1    0.12    0.05
   1  -3   1    0.27    0.11
   1  -3   1    0.08    0.05
  -1   3  -1    0.10    0.09
  -1   3  -1    0.10    0.08
  -1   3  -1    0.05    0.05
  -1   3  -1    0.11    0.05
   0  -3   1   81.39    1.55
   0  -3   1   81.66    1.56
   0   3  -1   82.53    1.55
   0   3  -1   83.59    1.56
   0   3  -1   84.64    1.56
   0   3  -1   82.76    1.56
  -1  -3   1   63.60    1.22
   1   3  -1   62.07    1.23
   1   3  -1   64.24    1.22
   1   3  -1   63.89    1.21
  -2  -3   1   15.63    0.33
  -2  -3   1   15.47    0.39
  -2  -3   1   15.59    0.39
   2   3  -1   15.57    0.40
   2   3  -1   15.62    0.38
   2   3  -1   15.42    0.34
  -3  -3   1   -0.06    0.09
  -3  -3   1    0.20    0.14
  -3  -3   1   -0.04    0.13
   3   3  -1   -0.16    0.15
   3   3  -1   -0.10    0.08
   3   3  -1    0.18    0.12
  -4  -3   1    0.67    0.12
  -4  -3   1    0.70    0.18
  -4  -3   1    0.55    0.17
   4   3  -1    0.61    0.18
   4   3  -1    0.56    0.10
   4   3  -1    0.44    0.13
  -5  -3   1    3.52    0.22
  -5  -3   1    3.90    0.18
  -5  -3   1    3.94    0.28
  -5  -3   1    3.32    0.26
   5   3  -1    3.80    0.24
   5   3  -1    3.68    0.26
   5   3  -1    3.40    0.18
  -6  -3   1    7.37    0.40
  -6  -3   1    6.77    0.29
   6   3  -1    6.94    0.32
   6   3  -1    7.12    0.40
   6   3  -1    6.54    0.25
  -7  -3   1    1.01    0.19
  -7  -3   1    0.54    0.26
   7   3  -1    1.00    0.26
   7   3  -1    0.91    0.19
  -8  -3   1    0.09    0.27
   8   3  -1    0.01    0.25
   8   3  -1    0.39    0.21
  -9  -3   1    1.19    0.33
   9   3  -1    1.84    0.34
 -10  -3   1    0.00    0.34
  10   3  -1    0.60    0.33
  10   3  -1   -0.24    0.28
  10  -2   1   -0.31    0.34
 -10   2  -1    0.33    0.36
   9  -2   1    0.48    0.26
   9  -2   1    0.12    0.31
  -9   2  -1    0.02    0.32
  -9   2  -1   -0.05    0.28
   8  -2   1    1.00    0.24
   8  -2   1    1.05    0.31
  -8   2  -1    1.16    0.30
  -8   2  -1    0.27    0.23
   7  -2   1    0.39    0.21
   7  -2   1    0.26    0.25
  -7   2  -1   -0.18    0.21
  -7   2  -1    0.11    0.20
   6  -2   1   12.83    0.45
   6  -2   1   12.84    0.37
   6  -2   1   12.99    0.50
  -6   2  -1   11.52    0.48
  -6   2  -1   12.55    0.44
  -6   2  -1   12.61    0.36
   5  -2   1    2.85    0.19
   5  -2   1    2.23    0.19
  -5   2  -1    2.69    0.25
  -5   2  -1    2.63    0.22
  -5   2  -1    2.67    0.17
   4  -2   1    1.38    0.16
   4  -2   1    1.45    0.12
  -4   2  -1    1.09    0.17
  -4   2  -1    1.42    0.12
  -4   2  -1    1.50    0.12
  -4   2  -1    1.64    0.17
   3  -2   1    7.43    0.26
   3  -2   1    7.60    0.22
  -3   2  -1    7.82    0.28
  -3   2  -1    7.87    0.23
  -3   2  -1    7.68    0.22
  -3   2  -1    7.59    0.28
   2  -2   1    5.90    0.25
   2  -2   1    5.68    0.16
   2  -2   1    5.57    0.20
  -2   2  -1    5.20    0.16
  -2   2  -1    5.25    0.21
  -2   2  -1    5.30    0.24
  -2   2  -1    5.55    0.19
   1  -2   1    0.02    0.04
   1  -2   1   -0.02    0.09
   1  -2   1   -0.01    0.06
  -1   2  -1    0.14    0.07
  -1   2  -1    0.10    0.09
  -1   2  -1    0.08    0.08
  -1   2  -1    0.03    0.04
   0  -2   1    3.96    0.10
   0  -2   1    3.83    0.10
   0   2  -1    4.20    0.11
   0   2  -1    4.12    0.10
   0   2  -1    3.95    0.10
   0   2  -1    3.78    0.09
  -1  -2   1    2.34    0.07
  -1  -2   1    2.17    0.14
  -1  -2   1    2.19    0.13
   1   2  -1    2.32    0.13
   1   2  -1    2.05    0.10
   1   2  -1    2.25    0.07
   1   2  -1    2.26    0.07
  -2  -2   1    0.02    0.13
  -2  -2   1    0.14    0.08
  -2  -2   1    0.13    0.08
  -2  -2   1    0.01    0.12
   2   2  -1    0.12    0.11
   2   2  -1    0.10    0.08
   2   2  -1    0.24    0.14
  -3  -2   1   11.57    0.29
  -3  -2   1   11.76    0.36
  -3  -2   1   12.05    0.31
  -3  -2   1   11.61    0.34
   3   2  -1   11.91    0.32
   3   2  -1   11.99    0.29
   3   2  -1   11.62    0.37
  -4  -2   1   11.21    0.30
  -4  -2   1   11.20    0.38
  -4  -2   1   11.64    0.33
  -4  -2   1   10.62    0.38
   4   2  -1   11.63    0.30
   4   2  -1   11.24    0.38
   4   2  -1   11.29    0.34
  -5  -2   1    3.45    0.19
  -5  -2   1    2.96    0.23
  -5  -2   1    3.97    0.30
  -5  -2   1    3.44    0.23
   5   2  -1    3.76    0.23
   5   2  -1    3.43    0.19
   5   2  -1    2.98    0.23
  -6  -2   1    6.47    0.38
  -6  -2   1    6.92    0.31
  -6  -2   1    6.38    0.26
   6   2  -1    6.49    0.29
   6   2  -1    7.34    0.40
   6   2  -1    6.40    0.25
  -7  -2   1    3.20    0.25
  -7  -2   1    3.17    0.33
   7   2  -1    2.84    0.24
   7   2  -1    2.69    0.29
  -8  -2   1    6.17    0.44
   8   2  -1    6.29    0.36
   8   2  -1    6.65    0.46
  -9  -2   1    0.30    0.30
   9   2  -1    1.11    0.32
 -10  -2   1    0.42    0.37
  10   2  -1    0.55    0.36
  10   2  -1    1.34    0.34
  10  -1   1    3.18    0.37
  10  -1   1    1.70    0.39
 -10   1  -1    1.95    0.41
   9  -1   1    2.58    0.32
   9  -1   1    1.34    0.36
  -9   1  -1    1.38    0.36
   8  -1   1    1.30    0.26
   8  -1   1    0.72    0.31
  -8   1  -1    0.71    0.30
  -8   1  -1    0.34    0.24
   7  -1   1    0.18    0.20
   7  -1   1   -0.12    0.15
  -7   1  -1   -0.14    0.19
  -7   1  -1   -0.05    0.24
   6  -1   1    0.37    0.18
   6  -1   1    0.03    0.13
  -6   1  -1    0.48    0.19
  -6   1  -1    0.51    0.21
  -6   1  -1    0.09    0.12
   5  -1   1    0.16    0.11
   5  -1   1    0.37    0.15
  -5   1  -1    0.29    0.18
  -5   1  -1    0.42    0.16
  -5   1  -1    0.25    0.11
   4  -1   1    8.83    0.32
   4  -1   1    8.21    0.26
  -4   1  -1    8.52    0.31
  -4   1  -1    8.67    0.25
  -4   1  -1    8.06    0.32
   3  -1   1    0.23    0.12
   3  -1   1    0.23    0.09
  -3   1  -1    0.40    0.09
  -3   1  -1    0.35    0.09
  -3   1  -1    0.29    0.13
  -3   1  -1    0.19    0.13
   2  -1   1    5.69    0.22
   2  -1   1    5.73    0.17
  -2   1  -1    5.81    0.22
  -2   1  -1    5.77    0.17
  -2   1  -1    5.67    0.17
   1  -1   1    0.17    0.04
   1  -1   1    0.08    0.07
   1  -1   1    0.15    0.04
  -1   1  -1    0.01    0.06
  -1   1  -1    0.15    0.03
  -1   1  -1    0.29    0.08
  -1   1  -1    0.05    0.05
   0  -1   1    0.01    0.02
   0  -1   1    0.03    0.02
   0   1  -1   -0.01    0.02
   0   1  -1   -0.01    0.02
  -1  -1   1    5.06    0.13
  -1  -1   1    4.93    0.13
  -1  -1   1    4.94    0.15
  -1  -1   1    5.14    0.15
   1   1  -1    4.94    0.13
   1   1  -1    5.02    0.13
   1   1  -1    5.10    0.15
  -2  -1   1  110.54    2.14
  -2  -1   1  112.11    2.11
  -2  -1   1  112.37    2.12
  -2  -1   1  110.92    2.11
  -2  -1   1  109.42    2.13
   2   1  -1  112.17    2.12
   2   1  -1  113.04    2.11
   2   1  -1  113.26    2.14
  -3  -1   1    4.58    0.23
  -3  -1   1    4.74    0.21
  -3  -1   1    5.06    0.25
  -3  -1   1    4.70    0.20
  -3  -1   1    4.34    0.17
   3   1  -1    4.77    0.25
   3   1  -1    4.42    0.20
   3   1  -1    4.63    0.18
  -4  -1   1    1.74    0.19
  -4  -1   1    1.56    0.18
  -4  -1   1    1.70    0.13
  -4  -1   1    1.73    0.15
   4   1  -1    1.45    0.14
   4   1  -1    1.33    0.12
   4   1  -1    1.49    0.18
  -5  -1   1    8.27    0.31
  -5  -1   1    9.15    0.27
  -5  -1   1    8.19    0.36
  -5  -1   1    8.81    0.37
   5   1  -1    8.58    0.35
   5   1  -1    8.67    0.31
   5   1  -1    8.69    0.27
  -6  -1   1    1.27    0.15
  -6  -1   1    0.55    0.17
  -6  -1   1    0.91    0.23
   6   1  -1    0.86    0.21
   6   1  -1    0.82    0.14
   6   1  -1    0.58    0.16
  -7  -1   1    2.62    0.25
  -7  -1   1    2.19    0.30
   7   1  -1    2.64    0.23
   7   1  -1    2.64    0.29
  -8  -1   1    1.65    0.30
  -8  -1   1    1.85    0.25
   8   1  -1    2.32    0.30
  -9  -1   1    1.18    0.30
   9   1  -1    1.05    0.31
   9   1  -1    1.89    0.33
 -10  -1   1   -0.11    0.34
  10   1  -1    0.78    0.32
  10   1  -1    0.60    0.35
  10   0   1   -0.32    0.31
  10   0   1    0.46    0.30
 -10   0  -1    0.65    0.35
   9   0   1    0.41    0.27
   9   0   1    0.39    0.32
  -9   0  -1   -0.22    0.30
   8   0   1    0.07    0.25
   8   0   1    0.33    0.23
  -8   0  -1   -0.27    0.26
  -8   0  -1    0.27    0.22
   7   0   1   -0.21    0.15
   7   0   1    0.18    0.21
  -7   0  -1    0.11    0.25
  -7   0  -1    0.34    0.20
   6   0   1    0.09    0.13
   6   0   1    0.12    0.17
   6   0   1   -0.03    0.11
  -6   0  -1   -0.05    0.11
  -6   0  -1    0.03    0.17
  -6   0  -1    0.27    0.19
   5   0   1    0.73    0.13
   5   0   1    1.09    0.18
  -5   0  -1    0.94    0.12
  -5   0  -1    0.70    0.17
  -5   0  -1    0.57    0.16
   4   0   1    0.03    0.14
   4   0   1   -0.01    0.10
  -4   0  -1    0.05    0.16
  -4   0  -1    0.00    0.13
  -4   0  -1    0.03    0.09
   3   0   1    3.21    0.23
   3   0   1    2.60    0.16
  -3   0  -1    2.80    0.14
  -3   0  -1    2.78    0.20
  -3   0  -1    2.68    0.21
   2   0   1    0.01    0.08
   2   0   1   -0.04    0.12
  -2   0  -1   -0.12    0.10
  -2   0  -1   -0.16    0.11
  -2   0  -1    0.03    0.07
   1   0   1    1.23    0.07
   1   0   1    1.53    0.11
   1   0   1    1.38    0.06
   1   0   1    1.28    0.08
  -1   0  -1    1.41    0.10
  -1   0  -1    1.43    0.07
  -1   0  -1    1.35    0.06
  -1   0  -1    1.35    0.10
  -1   0   1    0.52    0.06
  -1   0   1    0.53    0.06
  -1   0   1    0.55    0.07
  -1   0   1    0.55    0.07
  -1   0   1    0.45    0.06
  -2   0   1   -0.05    0.12
  -2   0   1   -0.02    0.08
  -2   0   1   -0.04    0.11
  -2   0   1   -0.06    0.09
  -2   0   1    0.17    0.10
   2   0  -1    0.05    0.09
   2   0  -1   -0.07    0.11
  -3   0   1    0.62    0.10
  -3   0   1    0.62    0.13
  -3   0   1    0.33    0.11
  -3   0   1    0.47    0.14
  -3   0   1    0.34    0.15
   3   0  -1    0.47    0.11
   3   0  -1    0.46    0.13
  -4   0   1    0.08    0.14
  -4   0   1   -0.05    0.10
  -4   0   1    0.03    0.14
  -4   0   1   -0.14    0.11
  -4   0   1    0.02    0.13
   4   0  -1   -0.12    0.11
   4   0  -1    0.10    0.14
  -5   0   1    1.39    0.20
  -5   0   1    1.96    0.22
  -5   0   1    1.72    0.14
  -5   0   1    1.92    0.18
   5   0  -1    1.78    0.20
   5   0  -1    1.73    0.16
   5   0  -1    1.51    0.14
  -6   0   1   -0.27    0.19
  -6   0   1   -0.15    0.16
  -6   0   1   -0.16    0.12
   6   0  -1    0.17    0.17
   6   0  -1   -0.05    0.12
   6   0  -1   -0.14    0.13
  -7   0   1    2.21    0.24
  -7   0   1    2.26    0.29
   7   0  -1    1.87    0.21
   7   0  -1    2.18    0.26
  -8   0   1   -0.17    0.21
  -8   0   1   -0.22    0.27
   8   0  -1    0.41    0.23
  -9   0   1    0.38    0.31
   9   0  -1    0.75    0.28
   9   0  -1    0.67    0.32
 -10   0   1   -0.12    0.33
  10   0  -1   -0.76    0.29
  10   0  -1    0.36    0.29
  10   1   1    2.78    0.38
  10   1   1    2.31    0.41
 -10  -1  -1    2.12    0.41
   9   1   1    1.94    0.36
   9   1   1    1.77    0.32
  -9  -1  -1    1.41    0.34
   8   1   1    1.44    0.27
  -8  -1  -1    0.84    0.23
  -8  -1  -1    0.69    0.30
   7   1   1   -0.06    0.16
   7   1   1    0.19    0.23
  -7  -1  -1   -0.08    0.18
  -7  -1  -1   -0.12    0.24
   6   1   1    0.10    0.14
   6   1   1    0.14    0.11
   6   1   1    0.28    0.20
  -6  -1  -1    0.20    0.12
  -6  -1  -1    0.33    0.17
  -6  -1  -1    0.34    0.19
   5   1   1    0.24    0.10
   5   1   1    0.63    0.17
   5   1   1    0.11    0.12
  -5  -1  -1    0.21    0.10
  -5  -1  -1    0.38    0.15
  -5  -1  -1    0.10    0.18
   4   1   1    8.40    0.33
   4   1   1    7.98    0.27
   4   1   1    8.65    0.24
  -4  -1  -1    8.48    0.23
  -4  -1  -1    9.11    0.30
  -4  -1  -1    8.55    0.35
   3   1   1    0.23    0.14
   3   1   1    0.24    0.10
  -3  -1  -1    0.29    0.11
  -3  -1  -1    0.35    0.08
  -3  -1  -1    0.29    0.14
   2   1   1    5.40    0.18
  -2  -1  -1    5.63    0.24
  -2  -1  -1    5.84    0.19
  -2  -1  -1    5.66    0.15
   1   1   1    0.10    0.03
   1   1   1    0.15    0.06
   1   1   1    0.03    0.08
   1   1   1    0.11    0.03
  -1  -1  -1    0.16    0.07
  -1  -1  -1    0.12    0.03
  -1  -1  -1    0.10    0.05
   0   1   1    0.02    0.02
   0   1   1   -0.02    0.02
   0   1   1    0.00    0.02
   0  -1  -1    0.01    0.02
  -1   1   1    4.91    0.14
  -1   1   1    5.07    0.14
  -1   1   1    4.98    0.13
  -1   1   1    5.07    0.15
  -1   1   1    5.01    0.15
   1  -1  -1    5.00    0.15
  -2   1   1  110.46    2.11
  -2   1   1  112.55    2.13
  -2   1   1  112.24    2.12
  -2   1   1  109.95    2.11
  -2   1   1  111.89    2.12
   2  -1  -1  111.85    2.12
  -3   1   1    4.59    0.22
  -3   1   1    4.99    0.19
  -3   1   1    4.37    0.25
  -3   1   1    4.59    0.24
  -3   1   1    4.23    0.19
   3  -1  -1    4.30    0.19
   3  -1  -1    4.06    0.22
  -4   1   1    1.74    0.14
  -4   1   1    1.38    0.17
  -4   1   1    1.44    0.16
  -4   1   1    1.64    0.14
  -4   1   1    1.60    0.19
   4  -1  -1    1.48    0.15
   4  -1  -1    1.55    0.14
  -5   1   1    8.90    0.30
  -5   1   1    8.52    0.28
  -5   1   1    8.77    0.34
  -5   1   1    8.48    0.35
  -5   1   1    8.82    0.34
   5  -1  -1    8.26    0.30
   5  -1  -1    8.32    0.33
  -6   1   1    0.70    0.19
  -6   1   1    0.76    0.15
  -6   1   1    0.81    0.18
   6  -1  -1    0.78    0.15
   6  -1  -1    0.84    0.19
   6  -1  -1    0.83    0.14
  -7   1   1    2.53    0.21
  -7   1   1    3.01    0.32
  -7   1   1    2.36    0.25
   7  -1  -1    2.45    0.22
   7  -1  -1    2.48    0.26
   7  -1  -1    2.65    0.20
  -8   1   1    1.52    0.32
  -8   1   1    2.02    0.27
   8  -1  -1    2.26    0.28
   8  -1  -1    1.91    0.33
  -9   1   1    1.08    0.35
   9  -1  -1    1.56    0.29
   9  -1  -1    0.56    0.33
 -10   1   1    0.57    0.36
  10  -1  -1    0.57    0.36
  10   2   1    0.75    0.33
  10   2   1   -0.28    0.33
 -10  -2  -1    0.02    0.35
   9   2   1    0.48    0.30
  -9  -2  -1    0.20    0.32
   8   2   1    1.06    0.28
  -8  -2  -1    0.31    0.29
   7   2   1    0.20    0.17
   7   2   1   -0.11    0.23
  -7  -2  -1   -0.19    0.17
  -7  -2  -1    0.10    0.22
   6   2   1   12.61    0.39
   6   2   1   12.24    0.33
   6   2   1   13.02    0.49
  -6  -2  -1   12.52    0.34
  -6  -2  -1   13.33    0.42
  -6  -2  -1   11.76    0.46
   5   2   1    2.50    0.22
   5   2   1    2.23    0.17
   5   2   1    2.33    0.16
  -5  -2  -1    2.07    0.18
  -5  -2  -1    2.29    0.24
  -5  -2  -1    2.50    0.16
   4   2   1    1.42    0.19
   4   2   1    1.54    0.14
   4   2   1    1.57    0.11
  -4  -2  -1    1.52    0.14
  -4  -2  -1    1.42    0.18
  -4  -2  -1    1.34    0.10
   3   2   1    7.57    0.28
   3   2   1    7.72    0.20
   3   2   1    7.94    0.26
  -3  -2  -1    7.56    0.30
  -3  -2  -1    7.99    0.25
  -3  -2  -1    7.81    0.20
   2   2   1    5.45    0.15
   2   2   1    5.81    0.21
   2   2   1    5.84    0.25
  -2  -2  -1    5.19    0.22
  -2  -2  -1    5.44    0.25
  -2  -2  -1    5.61    0.18
   1   2   1    0.01    0.05
   1   2   1    0.01    0.04
   1   2   1    0.15    0.09
   1   2   1    0.00    0.08
  -1  -2  -1    0.02    0.08
  -1  -2  -1    0.00    0.05
  -1  -2  -1    0.02    0.04
   0   2   1    4.13    0.11
   0   2   1    4.10    0.10
   0   2   1    3.98    0.11
   0   2   1    4.03    0.10
   0  -2  -1    4.05    0.10
   0  -2  -1    3.81    0.13
   0  -2  -1    4.13    0.10
   0  -2  -1    4.07    0.10
   0  -2  -1    4.06    0.11
  -1   2   1    2.11    0.12
  -1   2   1    2.16    0.12
  -1   2   1    2.22    0.09
  -1   2   1    2.18    0.10
  -1   2   1    2.05    0.12
   1  -2  -1    2.28    0.12
   1  -2  -1    2.10    0.09
  -2   2   1    0.22    0.13
  -2   2   1    0.17    0.12
  -2   2   1    0.05    0.10
  -2   2   1    0.10    0.08
  -2   2   1    0.07    0.10
   2  -2  -1    0.00    0.10
   2  -2  -1    0.02    0.13
  -3   2   1   11.38    0.33
  -3   2   1   12.22    0.35
  -3   2   1   11.58    0.30
  -3   2   1   11.44    0.35
  -3   2   1   12.01    0.31
   3  -2  -1   11.82    0.30
   3  -2  -1   11.74    0.33
  -4   2   1   11.19    0.31
  -4   2   1   11.19    0.38
  -4   2   1   10.80    0.34
  -4   2   1   11.33    0.32
  -4   2   1   11.89    0.36
   4  -2  -1   10.86    0.34
   4  -2  -1   11.06    0.31
  -5   2   1    3.50    0.26
  -5   2   1    3.60    0.26
  -5   2   1    3.40    0.21
  -5   2   1    3.57    0.21
   5  -2  -1    3.38    0.20
   5  -2  -1    3.31    0.25
  -6   2   1    6.85    0.29
  -6   2   1    6.70    0.38
  -6   2   1    5.68    0.33
   6  -2  -1    7.28    0.39
   6  -2  -1    6.72    0.33
   6  -2  -1    6.58    0.29
  -7   2   1    2.62    0.28
  -7   2   1    2.85    0.21
  -7   2   1    3.02    0.27
   7  -2  -1    3.17    0.27
   7  -2  -1    2.45    0.30
   7  -2  -1    3.20    0.22
   7  -2  -1    2.97    0.23
  -8   2   1    6.33    0.48
  -8   2   1    6.43    0.40
   8  -2  -1    6.77    0.49
   8  -2  -1    7.47    0.42
  -9   2   1    0.05    0.31
  -9   2   1    0.64    0.30
   9  -2  -1    0.60    0.25
   9  -2  -1    0.89    0.32
 -10   2   1    0.40    0.37
  10  -2  -1    0.10    0.34
  10   3   1    0.97    0.34
  10   3   1    0.53    0.34
 -10  -3  -1    0.84    0.36
   9   3   1    1.00    0.31
  -9  -3  -1    0.69    0.33
   8   3   1    2.87    0.34
  -8  -3  -1    2.32    0.35
   7   3   1    0.17    0.17
   7   3   1    0.22    0.25
  -7  -3  -1    0.04    0.21
  -7  -3  -1    0.13    0.17
   6   3   1    4.48    0.28
   6   3   1    4.40    0.36
   6   3   1    4.59    0.20
  -6  -3  -1    4.39    0.26
  -6  -3  -1    4.46    0.32
   5   3   1   13.62    0.33
   5   3   1   13.10    0.46
   5   3   1   13.79    0.39
  -5  -3  -1   14.30    0.48
  -5  -3  -1   13.48    0.38
   4   3   1    8.16    0.28
   4   3   1    8.20    0.22
   4   3   1    8.24    0.35
  -4  -3  -1    7.88    0.26
  -4  -3  -1    8.02    0.34
   3   3   1    6.19    0.18
   3   3   1    6.39    0.30
   3   3   1    6.74    0.24
  -3  -3  -1    6.36    0.21
  -3  -3  -1    6.26    0.28
   2   3   1   14.34    0.35
   2   3   1   14.18    0.38
   2   3   1   13.98    0.30
  -2  -3  -1   14.03    0.31
  -2  -3  -1   14.77    0.39
   1   3   1    0.15    0.05
   1   3   1    0.15    0.10
   1   3   1    0.23    0.05
   1   3   1    0.26    0.10
  -1  -3  -1    0.06    0.09
  -1  -3  -1    0.01    0.04
   0   3   1   85.03    1.57
   0   3   1   83.16    1.58
   0   3   1   84.03    1.58
   0   3   1   82.08    1.58
   0  -3  -1   84.71    1.58
   0  -3  -1   84.09    1.58
  -1   3   1   64.04    1.24
  -1   3   1   63.67    1.20
  -1   3   1   65.65    1.22
  -1   3   1   63.14    1.23
   1  -3  -1   65.36    1.23
   1  -3  -1   62.67    1.20
  -2   3   1   15.72    0.40
  -2   3   1   15.27    0.34
  -2   3   1   15.75    0.35
  -2   3   1   15.77    0.37
  -2   3   1   15.54    0.39
   2  -3  -1   15.84    0.39
   2  -3  -1   15.82    0.35
  -3   3   1    0.03    0.14
  -3   3   1   -0.03    0.11
  -3   3   1    0.02    0.11
  -3   3   1    0.03    0.09
  -3   3   1   -0.04    0.14
   3  -3  -1   -0.28    0.14
   3  -3  -1   -0.05    0.11
  -4   3   1    0.67    0.11
  -4   3   1    0.47    0.14
  -4   3   1    0.53    0.16
  -4   3   1    0.60    0.17
  -4   3   1    0.67    0.13
   4  -3  -1    0.67    0.17
   4  -3  -1    0.42    0.13
   4  -3  -1    0.47    0.11
  -5   3   1    3.20    0.24
  -5   3   1    3.59    0.21
  -5   3   1    4.21    0.22
  -5   3   1    4.14    0.27
   5  -3  -1    3.55    0.27
   5  -3  -1    2.97    0.24
   5  -3  -1    3.33    0.21
  -6   3   1    7.20    0.37
  -6   3   1    7.01    0.29
  -6   3   1    6.91    0.36
  -6   3   1    7.25    0.30
   6  -3  -1    7.99    0.40
   6  -3  -1    7.13    0.34
   6  -3  -1    6.98    0.29
  -7   3   1    0.82    0.18
  -7   3   1    1.24    0.24
  -7   3   1    0.67    0.26
   7  -3  -1    0.78    0.27
   7  -3  -1    0.35    0.20
   7  -3  -1    0.83    0.17
  -8   3   1    0.01    0.25
  -8   3   1    0.13    0.23
   8  -3  -1   -0.24    0.25
   8  -3  -1   -0.05    0.22
  -9   3   1    1.15    0.33
  -9   3   1    1.41    0.30
   9  -3  -1    0.97    0.32
   9  -3  -1    2.13    0.30
 -10   3   1   -0.18    0.35
  10  -3  -1   -0.03    0.34
  10   4   1    0.44    0.35
 -10  -4  -1    0.52    0.36
   9   4   1    0.88    0.33
  -9  -4  -1    1.00    0.35
   8   4   1    0.43    0.21
   8   4   1    0.10    0.28
  -8  -4  -1    0.12    0.25
   7   4   1    0.09    0.18
   7   4   1   -0.11    0.23
  -7  -4  -1   -0.12    0.16
  -7  -4  -1    0.13    0.24
   6   4   1    9.18    0.44
   6   4   1    8.31    0.28
   6   4   1    8.70    0.34
  -6  -4  -1    8.87    0.33
  -6  -4  -1    8.62    0.43
   5   4   1    1.97    0.14
   5   4   1    1.71    0.22
   5   4   1    2.46    0.19
  -5  -4  -1    2.30    0.17
  -5  -4  -1    1.70    0.21
   4   4   1    3.51    0.23
   4   4   1    3.31    0.25
   4   4   1    3.19    0.14
  -4  -4  -1    3.24    0.19
  -4  -4  -1    3.26    0.24
   3   4   1   56.04    1.09
   3   4   1   57.64    1.14
   3   4   1   56.36    1.17
  -3  -4  -1   56.70    1.17
  -3  -4  -1   56.55    1.17
  -3  -4  -1   56.87    1.10
   2   4   1    0.43    0.07
   2   4   1    0.35    0.12
   2   4   1    0.53    0.15
  -2  -4  -1    0.39    0.07
  -2  -4  -1    0.09    0.14
  -2  -4  -1    0.38    0.15
   1   4   1    2.43    0.17
   1   4   1    2.04    0.12
   1   4   1    2.32    0.09
   1   4   1    2.43    0.18
  -1  -4  -1    2.11    0.14
  -1  -4  -1    2.35    0.09
  -1  -4  -1    2.22    0.09
   0   4   1    0.28    0.08
   0   4   1    0.45    0.09
   0   4   1    0.31    0.08
   0   4   1    0.40    0.07
   0  -4  -1    0.46    0.08
  -1   4   1    0.50    0.10
  -1   4   1    0.64    0.09
  -1   4   1    0.58    0.11
  -1   4   1    0.64    0.04
   1  -4  -1    0.63    0.04
   1  -4  -1    0.84    0.12
  -2   4   1   49.78    0.98
  -2   4   1   48.28    1.00
  -2   4   1   48.35    0.95
  -2   4   1   49.20    0.96
  -2   4   1   48.75    0.99
   2  -4  -1   49.85    0.95
   2  -4  -1   49.64    0.99
  -3   4   1    3.44    0.17
  -3   4   1    3.50    0.20
  -3   4   1    3.35    0.24
  -3   4   1    3.56    0.24
  -3   4   1    3.23    0.19
   3  -4  -1    3.52    0.19
   3  -4  -1    3.22    0.24
  -4   4   1   17.55    0.48
  -4   4   1   17.08    0.44
  -4   4   1   17.26    0.43
  -4   4   1   17.02    0.41
  -4   4   1   17.25    0.47
   4  -4  -1   16.93    0.48
   4  -4  -1   16.80    0.43
  -5   4   1    4.66    0.23
  -5   4   1    4.75    0.21
  -5   4   1    4.62    0.28
  -5   4   1    4.94    0.30
   5  -4  -1    4.30    0.26
   5  -4  -1    5.31    0.32
   5  -4  -1    4.25    0.21
  -6   4   1    2.48    0.18
  -6   4   1    2.47    0.27
  -6   4   1    2.47    0.20
  -6   4   1    2.20    0.25
   6  -4  -1    2.64    0.19
   6  -4  -1    2.85    0.28
   6  -4  -1    2.35    0.22
  -7   4   1    0.17    0.16
  -7   4   1    0.24    0.24
  -7   4   1    0.40    0.22
   7  -4  -1   -0.21    0.24
   7  -4  -1    0.01    0.25
   7  -4  -1   -0.28    0.17
  -8   4   1    0.05    0.24
  -8   4   1    0.03    0.26
   8  -4  -1   -0.17    0.21
   8  -4  -1    0.25    0.26
  -9   4   1    0.09    0.27
  -9   4   1   -0.05    0.31
   9  -4  -1   -0.07    0.31
   9  -4  -1   -0.03    0.26
 -10   4   1   -0.20    0.35
  10  -4  -1   -0.38    0.33
  10   5   1    0.21    0.35
 -10  -5  -1   -0.02    0.34
   9   5   1    0.83    0.33
  -9  -5  -1    0.73    0.34
   8   5   1    1.25    0.32
   8   5   1    1.77    0.25
  -8  -5  -1    0.96    0.30
   7   5   1    4.83    0.38
   7   5   1    4.93    0.34
  -7  -5  -1    4.98    0.38
   6   5   1    0.98    0.19
   6   5   1    1.13    0.24
  -6  -5  -1    0.85    0.15
  -6  -5  -1    0.91    0.23
   5   5   1    2.83    0.26
   5   5   1    2.50    0.15
   5   5   1    3.02    0.21
  -5  -5  -1    2.52    0.19
  -5  -5  -1    2.61    0.25
   4   5   1    7.48    0.21
   4   5   1    7.43    0.30
   4   5   1    7.92    0.35
  -4  -5  -1    7.51    0.23
  -4  -5  -1    7.61    0.31
   3   5   1   16.86    0.46
   3   5   1   16.71    0.36
   3   5   1   17.14    0.43
  -3  -5  -1   17.18    0.37
  -3  -5  -1   18.02    0.46
  -3  -5  -1   16.39    0.46
   2   5   1   12.79    0.29
   2   5   1   11.77    0.27
   2   5   1   13.04    0.37
   2   5   1   12.74    0.34
  -2  -5  -1   13.14    0.38
  -2  -5  -1   12.29    0.36
  -2  -5  -1   12.90    0.27
   1   5   1   27.17    0.58
   1   5   1   27.59    0.58
   1   5   1   27.00    0.55
  -1  -5  -1   27.84    0.53
  -1  -5  -1   26.73    0.59
  -1  -5  -1   27.56    0.53
   0   5   1    1.71    0.13
   0   5   1    1.96    0.13
   0   5   1    1.93    0.12
   0   5   1    2.05    0.16
   0  -5  -1    2.15    0.15
  -1   5   1   47.55    0.97
  -1   5   1   49.15    0.95
  -1   5   1   48.85    0.98
   1  -5  -1   49.41    0.97
  -2   5   1   79.72    1.58
  -2   5   1   80.01    1.52
  -2   5   1   80.67    1.54
  -2   5   1   80.61    1.57
   2  -5  -1   80.95    1.58
   2  -5  -1   81.36    1.52
  -3   5   1   33.47    0.74
  -3   5   1   33.67    0.75
  -3   5   1   32.93    0.68
  -3   5   1   33.30    0.71
  -3   5   1   32.08    0.68
   3  -5  -1   33.47    0.74
   3  -5  -1   32.96    0.68
  -4   5   1    3.05    0.22
  -4   5   1    3.19    0.22
  -4   5   1    3.33    0.23
  -4   5   1    3.52    0.18
   4  -5  -1    2.93    0.21
   4  -5  -1    3.06    0.22
  -5   5   1   10.30    0.34
  -5   5   1   10.29    0.30
  -5   5   1   10.38    0.39
  -5   5   1    9.72    0.40
   5  -5  -1    9.65    0.34
   5  -5  -1   10.63    0.41
   5  -5  -1   10.24    0.31
  -6   5   1    0.04    0.20
  -6   5   1   -0.11    0.12
  -6   5   1    0.04    0.15
  -6   5   1   -0.05    0.20
   6  -5  -1   -0.04    0.13
   6  -5  -1    0.22    0.21
   6  -5  -1   -0.02    0.15
  -7   5   1    3.15    0.32
  -7   5   1    2.82    0.29
  -7   5   1    2.72    0.23
   7  -5  -1    2.37    0.25
   7  -5  -1    2.79    0.31
  -8   5   1    0.26    0.28
  -8   5   1    0.51    0.26
   8  -5  -1    0.02    0.23
   8  -5  -1    0.06    0.22
  -9   5   1    1.34    0.31
  -9   5   1    0.91    0.34
   9  -5  -1    1.20    0.34
 -10   5   1    0.24    0.35
  10  -5  -1    0.83    0.37
   9   6   1   -0.10    0.32
  -9  -6  -1   -0.14    0.30
   8   6   1    0.46    0.30
   8   6   1    0.16    0.22
  -8  -6  -1    0.15    0.28
   7   6   1    1.00    0.22
   7   6   1    1.07    0.29
  -7  -6  -1    0.78    0.24
   6   6   1    0.57    0.24
   6   6   1    0.76    0.19
  -6  -6  -1    1.28    0.24
  -6  -6  -1    0.87    0.15
   5   6   1    1.66    0.24
   5   6   1    1.41    0.11
   5   6   1    1.84    0.20
  -5  -6  -1    1.34    0.22
  -5  -6  -1    1.49    0.13
   4   6   1    1.00    0.20
   4   6   1    1.06    0.17
   4   6   1    1.04    0.09
  -4  -6  -1    0.90    0.10
  -4  -6  -1    1.00    0.17
   3   6   1   23.21    0.48
   3   6   1   23.22    0.55
   3   6   1   22.79    0.58
  -3  -6  -1   23.42    0.47
  -3  -6  -1   23.55    0.58
   2   6   1    8.39    0.18
   2   6   1    8.51    0.22
   2   6   1    8.28    0.31
   2   6   1    8.25    0.29
  -2  -6  -1    8.39    0.18
  -2  -6  -1    8.46    0.28
  -2  -6  -1    8.00    0.29
   1   6   1    0.94    0.11
   1   6   1    1.17    0.08
   1   6   1    1.13    0.14
   1   6   1    0.89    0.13
  -1  -6  -1    0.82    0.13
  -1  -6  -1    1.16    0.07
   0   6   1   15.29    0.33
   0   6   1   14.62    0.37
   0   6   1   14.80    0.36
   0   6   1   15.14    0.34
   0  -6  -1   15.54    0.38
  -1   6   1   69.30    1.35
  -1   6   1   70.34    1.37
  -1   6   1   69.37    1.36
   1  -6  -1   70.16    1.37
  -2   6   1    9.80    0.22
  -2   6   1    9.86    0.26
  -2   6   1    9.66    0.31
  -2   6   1   10.15    0.33
   2  -6  -1    9.84    0.32
   2  -6  -1    9.96    0.22
  -3   6   1    4.81    0.23
  -3   6   1    4.45    0.25
  -3   6   1    4.48    0.18
  -3   6   1    4.52    0.26
   3  -6  -1    4.52    0.24
   3  -6  -1    4.35    0.18
  -4   6   1    2.18    0.20
  -4   6   1    2.13    0.17
  -4   6   1    2.05    0.14
  -4   6   1    2.21    0.22
   4  -6  -1    1.84    0.20
   4  -6  -1    2.17    0.15
  -5   6   1    4.46    0.32
  -5   6   1    4.68    0.25
  -5   6   1    4.56    0.31
  -5   6   1    4.96    0.21
   5  -6  -1    3.99    0.25
   5  -6  -1    4.44    0.29
   5  -6  -1    4.71    0.22
  -6   6   1    2.84    0.22
  -6   6   1    3.08    0.28
  -6   6   1    2.58    0.26
  -6   6   1    2.79    0.19
   6  -6  -1    2.66    0.22
   6  -6  -1    3.16    0.29
   6  -6  -1    2.90    0.22
  -7   6   1    4.94    0.36
  -7   6   1    4.63    0.31
  -7   6   1    5.00    0.39
   7  -6  -1    4.44    0.30
   7  -6  -1    5.23    0.38
  -8   6   1    4.06    0.37
  -8   6   1    4.05    0.38
   8  -6  -1    4.06    0.38
   8  -6  -1    3.82    0.31
  -9   6   1   -0.38    0.29
  -9   6   1    0.03    0.28
   9  -6  -1    0.09    0.32
 -10   6   1    0.03    0.32
 -10   6   1   -0.17    0.34
  10  -6  -1   -0.31    0.34
   9   7   1    0.15    0.32
  -9  -7  -1    0.64    0.34
   8   7   1    0.33    0.31
   8   7   1    0.15    0.22
  -8  -7  -1   -0.22    0.25
   7   7   1   15.10    0.52
   7   7   1   14.79    0.61
  -7  -7  -1   14.29    0.59
   6   7   1    1.42    0.27
   6   7   1    1.77    0.22
  -6  -7  -1    1.84    0.26
   5   7   1    0.56    0.17
   5   7   1    0.40    0.09
   5   7   1    0.48    0.22
  -5  -7  -1    0.33    0.19
  -5  -7  -1    0.57    0.11
   4   7   1    4.99    0.17
   4   7   1    5.03    0.32
   4   7   1    4.86    0.27
  -4  -7  -1    4.71    0.30
  -4  -7  -1    4.81    0.17
   3   7   1    4.86    0.30
   3   7   1    4.46    0.17
   3   7   1    5.16    0.26
  -3  -7  -1    4.58    0.13
  -3  -7  -1    4.67    0.25
   2   7   1    2.77    0.20
   2   7   1    2.43    0.15
   2   7   1    2.88    0.19
  -2  -7  -1    2.71    0.20
  -2  -7  -1    2.89    0.20
   1   7   1    1.30    0.14
   1   7   1    1.62    0.16
   1   7   1    1.33    0.09
   1   7   1    1.43    0.12
  -1  -7  -1    1.11    0.14
  -1  -7  -1    1.36    0.09
   0   7   1  304.64    5.75
   0   7   1  301.80    5.81
   0   7   1  298.98    5.72
   0   7   1  297.22    5.72
   0  -7  -1  304.86    5.84
  -1   7   1   10.23    0.30
  -1   7   1   10.41    0.28
  -1   7   1   10.30    0.31
   1  -7  -1   10.27    0.31
  -2   7   1    7.86    0.31
  -2   7   1    7.65    0.26
  -2   7   1    7.53    0.24
   2  -7  -1    7.62    0.17
   2  -7  -1    7.58    0.17
   2  -7  -1    7.50    0.29
  -3   7   1   14.49    0.42
  -3   7   1   14.91    0.40
  -3   7   1   14.18    0.35
   3  -7  -1   14.28    0.33
   3  -7  -1   14.83    0.42
  -4   7   1    0.45    0.14
  -4   7   1    0.45    0.18
  -4   7   1    0.57    0.10
  -4   7   1    0.24    0.16
   4  -7  -1    0.52    0.11
   4  -7  -1    0.55    0.16
  -5   7   1    0.45    0.17
  -5   7   1    0.18    0.15
  -5   7   1    0.33    0.20
  -5   7   1    0.41    0.12
   5  -7  -1    0.27    0.13
   5  -7  -1    0.30    0.17
  -6   7   1    1.30    0.24
  -6   7   1    1.12    0.15
  -6   7   1    1.36    0.19
  -6   7   1    1.24    0.23
   6  -7  -1    1.26    0.25
   6  -7  -1    0.99    0.18
   6  -7  -1    1.09    0.15
  -7   7   1    1.37    0.27
  -7   7   1    1.27    0.27
  -7   7   1    1.09    0.21
   7  -7  -1    0.51    0.20
   7  -7  -1    0.74    0.26
  -8   7   1    0.48    0.27
  -8   7   1   -0.12    0.28
   8  -7  -1   -0.17    0.27
  -9   7   1   -0.15    0.31
  -9   7   1    0.01    0.30
   9  -7  -1    0.37    0.32
   9   8   1    0.03    0.32
  -9  -8  -1    0.23    0.33
   8   8   1    0.53    0.32
   8   8   1    0.15    0.24
  -8  -8  -1    0.49    0.30
   7   8   1    3.99    0.31
   7   8   1    4.09    0.37
  -7  -8  -1    4.04    0.38
   6   8   1   -0.08    0.18
   6   8   1    0.03    0.24
  -6  -8  -1   -0.07    0.23
   5   8   1    0.47    0.09
   5   8   1    0.27    0.18
   5   8   1    0.31    0.20
  -5  -8  -1    0.32    0.09
  -5  -8  -1    0.40    0.18
   4   8   1    1.14    0.18
   4   8   1    1.18    0.10
   4   8   1    0.77    0.19
  -4  -8  -1    0.87    0.17
  -4  -8  -1    1.29    0.09
   3   8   1   13.97    0.41
   3   8   1   14.14    0.44
   3   8   1   13.90    0.33
  -3  -8  -1   14.17    0.43
   2   8   1   63.81    1.30
   2   8   1   65.08    1.29
   2   8   1   64.21    1.24
  -2  -8  -1   62.21    1.29
   1   8   1    3.45    0.14
   1   8   1    3.58    0.21
   1   8   1    3.82    0.19
   1   8   1    4.27    0.24
  -1  -8  -1    3.85    0.14
  -1  -8  -1    3.66    0.23
   0   8   1   29.46    0.64
   0   8   1   29.17    0.63
   0   8   1   29.70    0.62
   0   8   1   29.05    0.60
   0  -8  -1   29.03    0.64
  -1   8   1   35.14    0.66
  -1   8   1   34.85    0.75
  -1   8   1   33.89    0.74
  -1   8   1   35.25    0.73
   1  -8  -1   34.37    0.75
  -2   8   1    5.23    0.20
  -2   8   1    4.92    0.25
  -2   8   1    5.32    0.26
   2  -8  -1    5.49    0.27
  -3   8   1   10.73    0.29
  -3   8   1   10.31    0.38
  -3   8   1   10.64    0.34
   3  -8  -1   10.56    0.25
   3  -8  -1   10.43    0.34
  -4   8   1    0.87    0.11
  -4   8   1    0.62    0.16
  -4   8   1    0.59    0.18
   4  -8  -1    0.80    0.11
   4  -8  -1    0.72    0.18
  -5   8   1    0.17    0.19
  -5   8   1   -0.01    0.15
  -5   8   1    0.35    0.11
  -5   8   1    0.10    0.20
   5  -8  -1    0.27    0.18
   5  -8  -1    0.27    0.13
  -6   8   1    4.40    0.24
  -6   8   1    4.74    0.37
  -6   8   1    4.78    0.29
  -6   8   1    4.95    0.37
   6  -8  -1    4.53    0.29
   6  -8  -1    4.69    0.25
   6  -8  -1    4.93    0.34
  -7   8   1    4.22    0.32
  -7   8   1    3.00    0.32
  -7   8   1    3.53    0.34
   7  -8  -1    3.66    0.34
   7  -8  -1    3.03    0.30
  -8   8   1    0.05    0.29
  -8   8   1    0.27    0.27
   8  -8  -1   -0.26    0.28
  -9   8   1    0.04    0.31
  -9   8   1   -0.14    0.30
   9  -8  -1   -0.03    0.30
   9   9   1    0.08    0.34
  -9  -9  -1   -0.25    0.28
   8   9   1    0.73    0.25
   8   9   1    0.87    0.34
  -8  -9  -1    0.61    0.31
   7   9   1    6.79    0.40
   7   9   1    6.65    0.51
  -7  -9  -1    5.99    0.47
   6   9   1   16.41    0.53
   6   9   1   15.90    0.60
  -6  -9  -1   15.30    0.57
   5   9   1    1.79    0.26
   5   9   1    1.80    0.20
   5   9   1    2.46    0.15
  -5  -9  -1    2.22    0.25
  -5  -9  -1    1.92    0.15
   4   9   1    4.01    0.28
   4   9   1    4.63    0.18
   4   9   1    4.32    0.32
  -4  -9  -1    3.69    0.30
   3   9   1   57.78    1.13
   3   9   1   57.05    1.22
   3   9   1   58.56    1.21
  -3  -9  -1   56.91    1.21
   2   9   1    0.73    0.16
   2   9   1    0.65    0.16
   2   9   1    0.52    0.11
  -2  -9  -1    0.45    0.14
  -2  -9  -1    0.56    0.05
  -2  -9  -1    0.50    0.06
   1   9   1   27.19    0.62
   1   9   1   26.08    0.60
   1   9   1   27.51    0.55
   1   9   1   27.58    0.59
  -1  -9  -1   27.61    0.56
  -1  -9  -1   27.46    0.63
   0   9   1   69.22    1.37
   0   9   1   70.78    1.39
   0   9   1   70.86    1.39
   0   9   1   70.14    1.36
   0  -9  -1   70.19    1.40
  -1   9   1    5.52    0.26
  -1   9   1    5.56    0.14
  -1   9   1    5.30    0.22
  -1   9   1    5.77    0.26
  -1   9   1    5.52    0.15
   1  -9  -1    5.17    0.24
  -2   9   1    1.40    0.13
  -2   9   1    1.41    0.16
  -2   9   1    1.51    0.19
   2  -9  -1    1.66    0.18
  -3   9   1   12.10    0.32
  -3   9   1   12.68    0.38
  -3   9   1   11.92    0.41
   3  -9  -1   12.27    0.27
   3  -9  -1   12.17    0.38
  -4   9   1   23.32    0.59
  -4   9   1   23.63    0.62
  -4   9   1   23.74    0.53
   4  -9  -1   23.66    0.51
   4  -9  -1   23.89    0.62
  -5   9   1    6.30    0.25
  -5   9   1    6.48    0.32
  -5   9   1    6.01    0.34
   5  -9  -1    6.40    0.25
   5  -9  -1    6.88    0.37
  -6   9   1    3.68    0.31
  -6   9   1    4.02    0.32
  -6   9   1    3.27    0.28
  -6   9   1    4.22    0.30
   6  -9  -1    3.43    0.25
   6  -9  -1    4.06    0.33
  -7   9   1    0.43    0.26
  -7   9   1    0.17    0.19
  -7   9   1    0.07    0.26
   7  -9  -1    0.59    0.28
  -8   9   1    0.38    0.29
  -8   9   1    0.45    0.28
  -8   9   1    0.92    0.35
   8  -9  -1    1.06    0.32
  -9   9   1    0.31    0.33
  -9   9   1    0.35    0.32
   9  -9  -1    0.12    0.33
   9  10   1    0.29    0.35
  -9 -10  -1    0.01    0.32
   8  10   1    0.18    0.25
   8  10   1    0.08    0.32
  -8 -10  -1   -0.27    0.29
   7  10   1   -0.12    0.29
   7  10   1    0.62    0.24
  -7 -10  -1    0.66    0.28
   6  10   1    2.49    0.26
   6  10   1    2.06    0.28
  -6 -10  -1    1.92    0.27
   5  10   1    5.24    0.35
   5  10   1    6.24    0.35
   5  10   1    6.32    0.22
  -5 -10  -1    5.68    0.37
   4  10   1    1.06    0.11
   4  10   1    0.34    0.20
   4  10   1    0.96    0.19
  -4 -10  -1    0.91    0.20
   3  10   1    0.87    0.20
   3  10   1    0.74    0.11
   3  10   1    0.97    0.16
  -3 -10  -1    0.77    0.18
   2  10   1    5.31    0.22
   2  10   1    5.44    0.28
   2  10   1    5.76    0.27
  -2 -10  -1    5.31    0.28
  -2 -10  -1    5.19    0.14
   1  10   1   21.33    0.52
   1  10   1   22.35    0.51
   1  10   1   21.22    0.46
   1  10   1   21.61    0.50
  -1 -10  -1   21.61    0.54
  -1 -10  -1   21.55    0.46
   0  10   1    2.53    0.18
   0  10   1    2.42    0.18
   0  10   1    2.00    0.13
   0  10   1    2.19    0.15
   0 -10  -1    2.01    0.17
  -1  10   1    2.92    0.20
  -1  10   1    3.44    0.21
  -1  10   1    2.93    0.11
  -1  10   1    2.96    0.23
   1 -10  -1    3.08    0.22
  -2  10   1    0.12    0.16
  -2  10   1   -0.07    0.11
  -2  10   1   -0.06    0.13
   2 -10  -1   -0.08    0.15
  -3  10   1   14.44    0.43
  -3  10   1   15.19    0.45
  -3  10   1   14.23    0.36
   3 -10  -1   14.24    0.44
  -4  10   1   12.29    0.40
  -4  10   1   11.84    0.45
  -4  10   1   12.03    0.33
   4 -10  -1   12.40    0.30
   4 -10  -1   12.54    0.43
  -5  10   1   -0.23    0.18
  -5  10   1    0.13    0.17
  -5  10   1    0.10    0.11
   5 -10  -1   -0.02    0.18
   5 -10  -1    0.02    0.11
  -6  10   1    1.27    0.26
  -6  10   1    1.22    0.21
   6 -10  -1    1.21    0.26
  -7  10   1   -0.07    0.19
  -7  10   1    0.41    0.26
   7 -10  -1    0.10    0.25
  -8  10   1    0.37    0.31
  -8  10   1    0.45    0.23
  -8  10   1    0.63    0.28
   8 -10  -1    0.36    0.29
  -9  10   1    0.12    0.32
   9 -10  -1    0.48    0.32
   9  11   1    0.50    0.29
   9  11   1    0.49    0.37
  -9 -11  -1    0.01    0.32
   8  11   1    0.28    0.31
   8  11   1    0.03    0.25
  -8 -11  -1    0.27    0.27
   7  11   1    0.33    0.25
   7  11   1   -0.07    0.26
  -7 -11  -1   -0.04    0.26
   6  11   1    6.34    0.46
   6  11   1    6.31    0.40
  -6 -11  -1    6.30    0.42
   5  11   1    0.93    0.22
   5  11   1    0.78    0.23
   5  11   1    0.90    0.12
  -5 -11  -1    1.04    0.23
   4  11   1    3.87    0.19
   4  11   1    4.35    0.27
   4  11   1    4.14    0.33
  -4 -11  -1    4.25    0.32
   3  11   1    7.08    0.24
   3  11   1    7.09    0.33
   3  11   1    7.36    0.35
  -3 -11  -1    6.58    0.31
   2  11   1   31.89    0.73
   2  11   1   32.50    0.73
   2  11   1   31.01    0.68
  -2 -11  -1   32.01    0.74
  -2 -11  -1   32.38    0.63
   1  11   1    5.05    0.27
   1  11   1    4.94    0.23
   1  11   1    4.90    0.18
   1  11   1    4.73    0.24
  -1 -11  -1    4.68    0.24
  -1 -11  -1    4.46    0.18
   0  11   1    0.38    0.15
   0  11   1    0.34    0.12
   0  11   1    0.13    0.10
   0  11   1    0.33    0.15
   0 -11  -1    0.16    0.14
  -1  11   1   10.66    0.33
  -1  11   1   10.83    0.34
  -1  11   1   10.91    0.25
  -1  11   1   10.96    0.34
   1 -11  -1   11.31    0.36
  -2  11   1    0.15    0.11
  -2  11   1    0.15    0.15
  -2  11   1    0.14    0.14
   2 -11  -1    0.17    0.16
  -3  11   1    8.73    0.32
  -3  11   1    8.62    0.28
  -3  11   1    8.90    0.38
   3 -11  -1    8.52    0.33
  -4  11   1    3.51    0.25
  -4  11   1    3.29    0.19
  -4  11   1    4.22    0.29
   4 -11  -1    3.43    0.25
   4 -11  -1    3.41    0.14
  -5  11   1    0.18    0.17
  -5  11   1    0.19    0.11
  -5  11   1    0.11    0.19
   5 -11  -1    0.27    0.20
   5 -11  -1    0.07    0.11
  -6  11   1    2.38    0.30
  -6  11   1    2.27    0.25
   6 -11  -1    2.17    0.29
  -7  11   1    3.78    0.30
  -7  11   1    3.69    0.35
   7 -11  -1    3.34    0.35
  -8  11   1    0.79    0.25
  -8  11   1    1.07    0.32
   8 -11  -1    1.39    0.33
  -9  11   1    0.50    0.33
   9 -11  -1   -0.04    0.33
   9  12   1    0.03    0.37
   9  12   1    0.06    0.28
  -9 -12  -1    0.72    0.35
   8  12   1    0.24    0.34
   8  12   1   -0.12    0.26
  -8 -12  -1    0.05    0.27
   7  12   1    0.19    0.31
   7  12   1   -0.04    0.24
  -7 -12  -1   -0.03    0.25
   6  12   1    1.16    0.26
   6  12   1    1.03    0.29
  -6 -12  -1    1.16    0.27
   5  12   1    6.85    0.42
   5  12   1    7.13    0.39
   5  12   1    6.71    0.25
  -5 -12  -1    6.61    0.37
   4  12   1    3.96    0.20
   4  12   1    4.23    0.28
   4  12   1    4.52    0.34
  -4 -12  -1    4.38    0.32
   3  12   1   20.33    0.48
   3  12   1   20.31    0.56
   3  12   1   20.44    0.57
  -3 -12  -1   20.45    0.57
   2  12   1    3.93    0.25
   2  12   1    3.94    0.26
   2  12   1    3.92    0.22
  -2 -12  -1    3.98    0.14
  -2 -12  -1    4.13    0.27
   1  12   1  140.39    2.70
   1  12   1  144.46    2.74
   1  12   1  142.34    2.74
   1  12   1  143.12    2.77
  -1 -12  -1  143.02    2.78
   0  12   1    2.81    0.20
   0  12   1    2.66    0.20
   0  12   1    2.86    0.18
   0  12   1    3.00    0.20
   0 -12  -1    3.57    0.23
  -1  12   1    1.21    0.16
  -1  12   1    1.29    0.16
  -1  12   1    1.33    0.11
  -1  12   1    1.66    0.17
   1 -12  -1    1.35    0.17
  -2  12   1    1.19    0.19
  -2  12   1    1.50    0.18
  -2  12   1    1.69    0.15
   2 -12  -1    1.49    0.18
  -3  12   1    0.40    0.17
  -3  12   1    0.47    0.19
  -3  12   1    0.25    0.11
   3 -12  -1    0.38    0.17
  -4  12   1   10.53    0.41
  -4  12   1   10.93    0.38
  -4  12   1   11.18    0.32
   4 -12  -1   10.56    0.40
  -5  12   1    0.42    0.22
  -5  12   1    0.25    0.12
  -5  12   1    0.19    0.18
   5 -12  -1    0.18    0.19
  -6  12   1    6.75    0.45
  -6  12   1    7.01    0.39
   6 -12  -1    7.85    0.45
  -7  12   1    0.08    0.27
  -7  12   1    0.27    0.21
   7 -12  -1    0.07    0.26
  -8  12   1    0.32    0.24
  -8  12   1    0.41    0.32
   8 -12  -1    0.45    0.32
  -9  12   1    0.50    0.35
   9 -12  -1    0.30    0.36
   9  13   1   -0.19    0.36
   9  13   1    0.42    0.30
  -9 -13  -1    0.04    0.34
   8  13   1    0.12    0.32
   8  13   1    0.01    0.27
  -8 -13  -1    0.20    0.30
   7  13   1   12.18    0.54
   7  13   1   12.90    0.63
  -7 -13  -1   11.43    0.55
   6  13   1    0.17    0.21
   6  13   1    0.40    0.27
  -6 -13  -1    0.22    0.26
   5  13   1    2.45    0.17
   5  13   1    2.48    0.27
   5  13   1    2.27    0.29
  -5 -13  -1    2.81    0.30
   4  13   1    1.96    0.22
   4  13   1    2.25    0.16
   4  13   1    1.91    0.23
  -4 -13  -1    1.88    0.24
   3  13   1    0.68    0.13
   3  13   1    0.76    0.19
   3  13   1    0.49    0.19
  -3 -13  -1    0.68    0.19
   2  13   1    3.36    0.25
   2  13   1    3.37    0.26
   2  13   1    3.80    0.22
  -2 -13  -1    3.46    0.14
  -2 -13  -1    3.78    0.27
   1  13   1   29.35    0.65
   1  13   1   27.36    0.65
   1  13   1   28.21    0.60
   1  13   1   28.78    0.67
  -1 -13  -1   27.70    0.67
   0  13   1    6.00    0.26
   0  13   1    5.88    0.22
   0  13   1    6.02    0.28
   0  13   1    5.94    0.25
   0 -13  -1    5.58    0.28
  -1  13   1   19.06    0.39
  -1  13   1   17.46    0.48
  -1  13   1   18.63    0.50
  -1  13   1   19.17    0.48
   1 -13  -1   18.67    0.51
  -2  13   1    3.47    0.24
  -2  13   1    3.34    0.22
  -2  13   1    2.55    0.20
   2 -13  -1    3.29    0.25
  -3  13   1    0.33    0.18
  -3  13   1    0.36    0.12
  -3  13   1    0.39    0.16
   3 -13  -1    0.37    0.17
  -4  13   1    4.33    0.31
  -4  13   1    4.99    0.33
  -4  13   1    4.87    0.23
   4 -13  -1    4.95    0.34
  -5  13   1    0.19    0.22
  -5  13   1   -0.10    0.18
  -5  13   1   -0.18    0.11
   5 -13  -1   -0.21    0.21
  -6  13   1    0.16    0.25
  -6  13   1   -0.12    0.21
   6 -13  -1    0.41    0.26
  -7  13   1    1.70    0.32
  -7  13   1    0.94    0.25
   7 -13  -1    1.08    0.30
  -8  13   1    4.85    0.42
  -8  13   1    4.65    0.36
   8 -13  -1    4.33    0.42
  -9  13   1    0.94    0.35
   9 -13  -1    1.09    0.38
   9  14   1    0.21    0.38
   9  14   1    0.27    0.30
  -9 -14  -1    0.35    0.35
   8  14   1    0.30    0.29
   8  14   1    0.29    0.37
  -8 -14  -1    0.57    0.33
   7  14   1    0.31    0.28
   7  14   1   -0.16    0.25
  -7 -14  -1   -0.01    0.25
   6  14   1    0.32    0.25
   6  14   1    0.65    0.28
  -6 -14  -1    0.48    0.27
   5  14   1    5.63    0.36
   5  14   1    5.77    0.43
  -5 -14  -1    6.01    0.40
   4  14   1    0.06    0.21
   4  14   1    0.48    0.13
   4  14   1    0.20    0.18
  -4 -14  -1    0.44    0.20
   3  14   1    0.00    0.18
   3  14   1    0.12    0.18
   3  14   1    0.22    0.13
  -3 -14  -1    0.30    0.18
   2  14   1   14.97    0.45
   2  14   1   15.44    0.42
   2  14   1   13.78    0.46
  -2 -14  -1   14.65    0.47
  -2 -14  -1   14.92    0.33
   1  14   1    8.35    0.31
   1  14   1    8.72    0.35
   1  14   1    8.68    0.26
   1  14   1    8.72    0.31
  -1 -14  -1    8.63    0.35
   0  14   1   -0.18    0.10
   0  14   1    0.15    0.15
   0  14   1    0.02    0.12
   0  14   1   -0.07    0.13
   0 -14  -1   -0.03    0.16
  -1  14   1   -0.04    0.15
  -1  14   1    0.14    0.07
  -1  14   1   -0.06    0.14
  -1  14   1    0.01    0.14
   1 -14  -1    0.10    0.15
  -2  14   1   40.95    0.93
  -2  14   1   40.84    0.93
  -2  14   1   41.86    0.89
   2 -14  -1   41.75    0.94
  -3  14   1    0.45    0.18
  -3  14   1    0.39    0.13
  -3  14   1    0.45    0.20
   3 -14  -1    0.51    0.20
  -4  14   1   13.10    0.47
  -4  14   1   12.65    0.37
  -4  14   1   12.99    0.45
   4 -14  -1   12.46    0.48
  -5  14   1    0.44    0.13
  -5  14   1    0.38    0.21
  -5  14   1    0.08    0.22
   5 -14  -1    0.43    0.20
  -6  14   1    3.10    0.29
  -6  14   1    4.25    0.37
   6 -14  -1    3.42    0.34
  -7  14   1    6.73    0.52
  -7  14   1    6.19    0.41
   7 -14  -1    7.09    0.50
  -8  14   1    1.03    0.35
  -8  14   1    1.48    0.28
   8 -14  -1    1.08    0.36
  -9  14   1   -0.03    0.35
   9 -14  -1    0.03    0.35
   8  15   1    0.91    0.31
   8  15   1    0.47    0.36
  -8 -15  -1    0.71    0.33
   7  15   1    1.94    0.34
   7  15   1    1.25    0.30
  -7 -15  -1    1.28    0.32
   6  15   1    0.50    0.26
   6  15   1    0.25    0.29
  -6 -15  -1    0.76    0.28
   5  15   1    9.26    0.45
   5  15   1    9.94    0.47
  -5 -15  -1    9.39    0.47
   4  15   1    0.38    0.14
   4  15   1    0.22    0.21
   4  15   1    0.21    0.19
  -4 -15  -1    0.53    0.21
   3  15   1    7.52    0.37
   3  15   1    6.38    0.37
   3  15   1    6.65    0.28
  -3 -15  -1    6.09    0.35
   2  15   1    9.08    0.39
   2  15   1    9.63    0.36
   2  15   1    9.43    0.33
  -2 -15  -1    9.42    0.36
  -2 -15  -1    9.94    0.25
   1  15   1    0.78    0.15
   1  15   1    1.01    0.15
   1  15   1    0.98    0.20
   1  15   1    0.93    0.12
  -1 -15  -1    0.75    0.18
   0  15   1   -0.04    0.16
   0  15   1   -0.17    0.15
   0  15   1   -0.13    0.10
   0  15   1   -0.02    0.12
   0 -15  -1   -0.15    0.15
  -1  15   1    9.22    0.34
  -1  15   1    9.20    0.36
  -1  15   1    9.04    0.34
  -1  15   1    9.38    0.24
   1 -15  -1    9.47    0.35
  -2  15   1   19.40    0.55
  -2  15   1   20.44    0.51
  -2  15   1   18.78    0.54
   2 -15  -1   19.47    0.55
  -3  15   1    1.84    0.17
  -3  15   1    1.90    0.24
  -3  15   1    1.73    0.23
   3 -15  -1    2.01    0.24
  -4  15   1    0.05    0.12
  -4  15   1    0.66    0.23
  -4  15   1   -0.17    0.18
   4 -15  -1   -0.16    0.21
  -5  15   1    2.74    0.27
  -5  15   1    2.37    0.28
   5 -15  -1    2.85    0.30
  -6  15   1   29.67    0.88
  -6  15   1   29.43    0.82
   6 -15  -1   31.86    0.88
  -7  15   1    1.54    0.34
  -7  15   1    1.82    0.29
   7 -15  -1    1.65    0.33
  -8  15   1    1.94    0.31
  -8  15   1    1.82    0.39
   8 -15  -1    2.18    0.36
  -9  15   1   -0.02    0.35
   9 -15  -1   -0.03    0.32
   8  16   1    2.03    0.35
   8  16   1    1.85    0.39
  -8 -16  -1    1.08    0.37
   7  16   1    1.22    0.31
   7  16   1    0.64    0.31
  -7 -16  -1    1.18    0.32
   6  16   1   11.23    0.54
   6  16   1   11.34    0.59
  -6 -16  -1   10.95    0.56
   5  16   1    3.34    0.34
   5  16   1    3.38    0.33
  -5 -16  -1    2.83    0.31
   4  16   1    1.21    0.25
   4  16   1    1.61    0.26
   4  16   1    1.35    0.17
  -4 -16  -1    1.22    0.25
   3  16   1    0.24    0.18
   3  16   1   -0.10    0.13
   3  16   1    0.11    0.18
  -3 -16  -1    0.03    0.18
   2  16   1    2.00    0.15
   2  16   1    2.15    0.19
   2  16   1    1.88    0.21
   2  16   1    2.31    0.22
  -2 -16  -1    1.66    0.21
  -2 -16  -1    2.04    0.15
   1  16   1    1.29    0.21
   1  16   1    0.94    0.15
   1  16   1    0.87    0.16
   1  16   1    0.99    0.13
  -1 -16  -1    0.69    0.19
  -1 -16  -1    0.74    0.12
   0  16   1    1.95    0.17
   0  16   1    1.61    0.19
   0  16   1    1.55    0.20
   0  16   1    1.57    0.14
   0 -16  -1    1.29    0.21
  -1  16   1    2.32    0.21
  -1  16   1    2.90    0.15
  -1  16   1    2.78    0.22
  -1  16   1    2.64    0.21
   1 -16  -1    2.43    0.21
  -2  16   1    4.35    0.28
  -2  16   1    4.08    0.30
  -2  16   1    4.56    0.25
   2 -16  -1    4.46    0.30
  -3  16   1    1.09    0.22
  -3  16   1    1.25    0.20
  -3  16   1    1.31    0.16
   3 -16  -1    0.82    0.20
  -4  16   1   -0.21    0.19
  -4  16   1   -0.06    0.19
  -4  16   1   -0.07    0.13
   4 -16  -1   -0.12    0.22
  -5  16   1   -0.16    0.25
  -5  16   1   -0.17    0.21
   5 -16  -1    0.65    0.23
  -6  16   1    0.06    0.25
  -6  16   1    0.09    0.24
   6 -16  -1    0.15    0.27
  -7  16   1    3.09    0.40
  -7  16   1    2.76    0.32
   7 -16  -1    2.75    0.35
  -8  16   1    2.10    0.32
  -8  16   1    1.25    0.38
   8 -16  -1    1.04    0.34
   8  17   1   -0.15    0.33
   8  17   1    0.48    0.31
  -8 -17  -1    1.08    0.35
   7  17   1   14.63    0.63
   7  17   1   14.84    0.66
  -7 -17  -1   14.96    0.67
   6  17   1    5.68    0.45
   6  17   1    5.32    0.40
  -6 -17  -1    6.02    0.48
   5  17   1    1.89    0.28
   5  17   1    2.37    0.31
  -5 -17  -1    1.98    0.28
   4  17   1   26.28    0.74
   4  17   1   25.48    0.62
   4  17   1   24.51    0.72
  -4 -17  -1   24.59    0.73
   3  17   1    2.50    0.27
   3  17   1    2.41    0.24
   3  17   1    2.44    0.20
  -3 -17  -1    1.96    0.23
   2  17   1    1.35    0.20
   2  17   1    1.61    0.22
   2  17   1    1.53    0.18
   2  17   1    1.31    0.12
  -2 -17  -1    1.35    0.12
  -2 -17  -1    1.17    0.20
   1  17   1    0.06    0.15
   1  17   1    0.07    0.18
   1  17   1    0.31    0.12
   1  17   1    0.26    0.15
  -1 -17  -1    0.06    0.11
  -1 -17  -1    0.06    0.17
   0  17   1    0.22    0.12
   0  17   1   -0.12    0.17
   0  17   1   -0.10    0.13
   0  17   1    0.12    0.15
   0 -17  -1    0.00    0.16
  -1  17   1    0.80    0.17
  -1  17   1    0.71    0.18
  -1  17   1    0.97    0.10
  -1  17   1    0.81    0.19
   1 -17  -1    0.77    0.19
  -2  17   1    0.08    0.18
  -2  17   1    0.08    0.14
  -2  17   1    0.26    0.17
   2 -17  -1    0.26    0.20
  -3  17   1    0.50    0.18
  -3  17   1    0.64    0.16
  -3  17   1    0.63    0.21
   3 -17  -1    0.95    0.23
  -4  17   1    2.92    0.27
  -4  17   1    3.44    0.31
  -4  17   1    3.66    0.24
   4 -17  -1    2.44    0.28
  -5  17   1   11.10    0.49
  -5  17   1   11.31    0.51
   5 -17  -1   10.57    0.52
  -6  17   1    7.28    0.51
  -6  17   1    6.51    0.45
   6 -17  -1    6.00    0.44
  -7  17   1    3.50    0.34
  -7  17   1    3.37    0.42
   7 -17  -1    2.74    0.38
  -8  17   1    0.57    0.36
  -8  17   1    0.18    0.27
   8 -17  -1    0.30    0.33
   8  18   1    0.13    0.34
   8  18   1   -0.30    0.30
  -8 -18  -1    0.16    0.33
   7  18   1    0.07    0.31
   7  18   1    0.55    0.34
  -7 -18  -1    0.82    0.33
   6  18   1    1.86    0.34
   6  18   1    1.90    0.33
  -6 -18  -1    1.75    0.33
   5  18   1    0.79    0.29
   5  18   1    0.81    0.29
  -5 -18  -1    0.20    0.23
   4  18   1    3.50    0.23
   4  18   1    2.70    0.29
   4  18   1    2.57    0.28
  -4 -18  -1    2.84    0.31
   3  18   1    0.67    0.17
   3  18   1    0.77    0.21
   3  18   1    0.89    0.21
  -3 -18  -1    0.81    0.22
   2  18   1   -0.12    0.19
   2  18   1   -0.05    0.17
   2  18   1    0.33    0.16
   2  18   1   -0.07    0.10
  -2 -18  -1    0.12    0.10
  -2 -18  -1    0.08    0.20
   1  18   1    1.12    0.14
   1  18   1    1.19    0.17
   1  18   1    1.10    0.19
   1  18   1    1.11    0.18
  -1 -18  -1    1.30    0.15
  -1 -18  -1    0.70    0.19
   0  18   1    0.52    0.19
   0  18   1    0.46    0.18
   0  18   1    0.24    0.12
   0  18   1    0.49    0.15
   0 -18  -1    0.50    0.20
  -1  18   1    1.51    0.20
  -1  18   1    1.12    0.11
  -1  18   1    0.99    0.21
  -1  18   1    1.26    0.19
   1 -18  -1    1.06    0.22
  -2  18   1    5.45    0.35
  -2  18   1    5.22    0.34
  -2  18   1    4.94    0.28
   2 -18  -1    4.99    0.36
  -3  18   1    2.81    0.26
  -3  18   1    3.52    0.28
  -3  18   1    3.35    0.23
   3 -18  -1    3.84    0.32
  -4  18   1    0.40    0.23
  -4  18   1    0.11    0.15
  -4  18   1    0.05    0.24
   4 -18  -1    0.31    0.24
  -5  18   1    3.20    0.31
  -5  18   1    4.30    0.38
   5 -18  -1    3.77    0.37
  -6  18   1    1.36    0.34
  -6  18   1    1.42    0.28
   6 -18  -1    1.97    0.35
  -7  18   1   10.52    0.53
  -7  18   1   10.21    0.62
   7 -18  -1   11.56    0.61
  -8  18   1    0.44    0.28
  -8  18   1    0.51    0.37
   8 -18  -1    0.29    0.34
   8  19   1    0.21    0.36
   8  19   1    0.61    0.34
  -8 -19  -1    0.07    0.34
   7  19   1    1.32    0.38
   7  19   1    1.04    0.35
  -7 -19  -1    1.61    0.36
   6  19   1    7.12    0.51
   6  19   1    8.17    0.56
  -6 -19  -1    7.07    0.48
   5  19   1    1.07    0.28
   5  19   1    1.07    0.27
  -5 -19  -1    1.40    0.30
   4  19   1    0.16    0.16
   4  19   1    0.23    0.26
   4  19   1    0.06    0.23
  -4 -19  -1    0.50    0.24
   3  19   1    0.15    0.16
   3  19   1    0.05    0.21
   3  19   1   -0.09    0.22
  -3 -19  -1   -0.02    0.21
   2  19   1    7.88    0.36
   2  19   1    7.08    0.37
   2  19   1    7.87    0.34
  -2 -19  -1    7.68    0.40
   1  19   1    0.93    0.15
   1  19   1    1.00    0.20
   1  19   1    0.84    0.17
   1  19   1    1.02    0.19
  -1 -19  -1    1.15    0.23
  -1 -19  -1    1.16    0.15
   0  19   1    0.27    0.15
   0  19   1    0.55    0.19
   0  19   1    0.40    0.18
   0  19   1    0.37    0.13
   0 -19  -1    0.65    0.19
  -1  19   1    2.43    0.25
  -1  19   1    2.14    0.22
  -1  19   1    2.06    0.22
   1 -19  -1    2.15    0.24
  -2  19   1    3.58    0.25
  -2  19   1    4.10    0.30
  -2  19   1    3.03    0.26
   2 -19  -1    4.03    0.32
  -3  19   1    0.82    0.22
  -3  19   1    0.90    0.21
  -3  19   1    1.27    0.19
   3 -19  -1    1.49    0.27
  -4  19   1   -0.18    0.23
  -4  19   1   -0.02    0.25
  -4  19   1    0.18    0.16
   4 -19  -1    0.19    0.24
  -5  19   1   -0.06    0.24
  -5  19   1    0.28    0.26
   5 -19  -1    0.30    0.28
  -6  19   1    0.19    0.26
  -6  19   1    0.61    0.29
   6 -19  -1   -0.69    0.27
  -7  19   1    5.16    0.42
  -7  19   1    3.98    0.44
   7 -19  -1    7.04    0.55
  -8  19   1   10.27    0.56
  -8  19   1    9.51    0.66
   8 -19  -1    9.37    0.63
   7  20   1   -0.22    0.33
   7  20   1   -0.19    0.30
  -7 -20  -1    0.16    0.32
   6  20   1    0.31    0.31
   6  20   1    0.74    0.32
  -6 -20  -1    0.37    0.30
   5  20   1    3.99    0.38
   5  20   1    3.73    0.38
  -5 -20  -1    3.43    0.37
   4  20   1    9.25    0.47
   4  20   1    9.91    0.38
   4  20   1    9.70    0.49
  -4 -20  -1    8.72    0.46
   3  20   1    2.10    0.27
   3  20   1    2.55    0.23
   3  20   1    2.84    0.28
  -3 -20  -1    1.67    0.26
   2  20   1    0.07    0.18
   2  20   1    0.48    0.24
   2  20   1   -0.05    0.18
  -2 -20  -1    0.12    0.19
   1  20   1    6.15    0.32
   1  20   1    5.55    0.34
   1  20   1    5.75    0.27
   1  20   1    5.88    0.30
  -1 -20  -1    5.90    0.38
  -1 -20  -1    5.65    0.27
   0  20   1   -0.16    0.19
   0  20   1    0.22    0.20
   0  20   1   -0.06    0.13
   0  20   1    0.08    0.15
   0 -20  -1   -0.04    0.21
  -1  20   1    4.90    0.32
  -1  20   1    5.67    0.36
  -1  20   1    5.36    0.32
   1 -20  -1    4.98    0.37
  -2  20   1    1.75    0.26
  -2  20   1    2.07    0.22
  -2  20   1    1.23    0.23
   2 -20  -1    1.52    0.26
  -3  20   1    0.67    0.18
  -3  20   1    0.54    0.22
  -3  20   1    0.38    0.23
   3 -20  -1    0.18    0.24
  -4  20   1    3.46    0.25
  -4  20   1    3.14    0.34
  -4  20   1    3.60    0.33
   4 -20  -1    3.11    0.32
  -5  20   1    0.01    0.24
  -5  20   1    0.27    0.29
   5 -20  -1   -0.22    0.26
  -6  20   1    0.57    0.34
  -6  20   1    0.72    0.28
   6 -20  -1    0.51    0.30
  -7  20   1    1.09    0.37
  -7  20   1    1.58    0.32
   7 -20  -1    1.74    0.37
   7  21   1    3.31    0.42
   7  21   1    3.71    0.42
  -7 -21  -1    3.77    0.42
   6  21   1   13.03    0.65
   6  21   1   11.82    0.62
  -6 -21  -1   11.72    0.61
   5  21   1    1.91    0.31
   5  21   1    2.34    0.35
  -5 -21  -1    1.86    0.33
   4  21   1    1.69    0.22
   4  21   1    1.73    0.30
   4  21   1    1.56    0.31
  -4 -21  -1    1.41    0.28
   3  21   1    0.86    0.20
   3  21   1    1.46    0.25
   3  21   1    1.03    0.27
  -3 -21  -1    1.05    0.27
   2  21   1    1.74    0.23
   2  21   1    2.15    0.24
   2  21   1    1.97    0.28
  -2 -21  -1    1.80    0.25
   1  21   1    0.76    0.21
   1  21   1    0.96    0.19
   1  21   1    0.94    0.16
   1  21   1    0.63    0.20
  -1 -21  -1    0.98    0.22
  -1 -21  -1    1.03    0.16
   0  21   1    2.53    0.22
   0  21   1    2.29    0.24
   0  21   1    2.31    0.24
   0 -21  -1    3.08    0.28
  -1  21   1    8.65    0.40
  -1  21   1    9.36    0.41
  -1  21   1    8.64    0.39
   1 -21  -1    8.89    0.44
  -2  21   1   -0.20    0.20
  -2  21   1    0.10    0.23
  -2  21   1    0.00    0.17
   2 -21  -1    0.07    0.21
  -3  21   1   -0.17    0.22
  -3  21   1   -0.04    0.22
  -3  21   1    0.23    0.18
   3 -21  -1   -0.23    0.24
  -4  21   1    1.45    0.28
  -4  21   1    2.30    0.31
   4 -21  -1    1.83    0.31
  -5  21   1    4.38    0.38
  -5  21   1    4.61    0.43
   5 -21  -1    4.54    0.38
  -6  21   1    1.78    0.32
  -6  21   1    0.98    0.33
   6 -21  -1    1.69    0.35
  -7  21   1    0.42    0.36
  -7  21   1    0.54    0.28
   7 -21  -1    0.11    0.33
   7  22   1   -0.32    0.34
   7  22   1   -0.13    0.35
  -7 -22  -1    0.46    0.34
   6  22   1    2.17    0.37
   6  22   1    1.80    0.37
  -6 -22  -1    1.83    0.37
   5  22   1    3.69    0.39
   5  22   1    4.00    0.41
  -5 -22  -1    4.26    0.40
   4  22   1    1.44    0.30
   4  22   1    2.21    0.30
   4  22   1    2.35    0.24
  -4 -22  -1    2.00    0.29
   3  22   1    9.03    0.47
   3  22   1    8.23    0.44
   3  22   1    9.02    0.41
  -3 -22  -1    8.91    0.46
   2  22   1    0.06    0.19
   2  22   1   -0.23    0.19
   2  22   1    0.09    0.21
  -2 -22  -1   -0.31    0.22
   1  22   1    1.64    0.24
   1  22   1    1.77    0.21
   1  22   1    1.93    0.30
   1  22   1    1.84    0.27
  -1 -22  -1    1.41    0.24
   0  22   1    1.35    0.25
   0  22   1    1.73    0.21
   0  22   1    1.30    0.24
   0 -22  -1    1.29    0.27
  -1  22   1    0.65    0.21
  -1  22   1    0.47    0.20
  -1  22   1    0.48    0.20
   1 -22  -1    0.74    0.25
  -2  22   1    2.00    0.27
  -2  22   1    1.56    0.27
  -2  22   1    1.47    0.22
   2 -22  -1    1.43    0.28
  -3  22   1    0.98    0.20
  -3  22   1    0.76    0.26
  -3  22   1    0.88    0.25
   3 -22  -1    0.54    0.27
  -4  22   1    0.67    0.27
  -4  22   1    0.61    0.26
   4 -22  -1    0.82    0.31
  -5  22   1    3.71    0.37
  -5  22   1    4.12    0.41
   5 -22  -1    3.39    0.38
  -6  22   1    1.17    0.31
  -6  22   1    1.44    0.37
   6 -22  -1    1.10    0.34
  -7  22   1    0.71    0.34
  -7  22   1    0.83    0.32
   7 -22  -1    0.41    0.33
   7  23   1    1.02    0.37
   7  23   1    1.25    0.38
  -7 -23  -1    0.96    0.37
   6  23   1    1.21    0.36
   6  23   1    0.94    0.35
  -6 -23  -1    1.27    0.35
   5  23   1    0.80    0.32
   5  23   1    0.85    0.32
  -5 -23  -1    0.37    0.30
   4  23   1    0.40    0.29
   4  23   1    0.18    0.27
   4  23   1    0.32    0.23
  -4 -23  -1    0.66    0.29
   3  23   1    0.23    0.20
   3  23   1    0.10    0.27
   3  23   1   -0.33    0.22
  -3 -23  -1    0.02    0.26
   2  23   1   -0.26    0.19
   2  23   1    0.23    0.25
   2  23   1    0.06    0.20
  -2 -23  -1   -0.02    0.25
   1  23   1    0.21    0.21
   1  23   1   -0.02    0.27
   1  23   1    0.07    0.23
  -1 -23  -1    0.26    0.24
   0  23   1    0.43    0.22
   0  23   1    0.57    0.24
   0  23   1    0.44    0.18
   0 -23  -1    0.74    0.26
  -1  23   1   -0.09    0.19
  -1  23   1   -0.31    0.19
  -1  23   1    0.24    0.23
   1 -23  -1    0.38    0.26
  -2  23   1   -0.07    0.22
  -2  23   1    0.03    0.19
  -2  23   1    0.03    0.24
   2 -23  -1   -0.33    0.24
  -3  23   1   -0.03    0.24
  -3  23   1   -0.13    0.22
  -3  23   1    0.16    0.19
   3 -23  -1    0.00    0.28
  -4  23   1    0.67    0.25
  -4  23   1    0.52    0.28
   4 -23  -1    0.95    0.31
  -5  23   1    0.86    0.30
  -5  23   1    1.10    0.30
   5 -23  -1    0.89    0.34
  -6  23   1    0.60    0.31
  -6  23   1    1.01    0.36
   6 -23  -1    0.62    0.31
  -7  23   1    0.37    0.39
  -7  23   1    0.24    0.30
   7 -23  -1   -0.39    0.33
   6  24   1    0.76    0.34
   6  24   1    0.26    0.34
  -6 -24  -1    0.40    0.33
   5  24   1    0.64    0.29
   5  24   1   -0.02    0.29
  -5 -24  -1    0.70    0.32
   4  24   1    0.77    0.29
   4  24   1    0.18    0.29
  -4 -24  -1    0.61    0.29
   3  24   1   -0.07    0.27
   3  24   1   -0.27    0.23
   3  24   1    0.22    0.21
  -3 -24  -1   -0.02    0.27
   2  24   1    0.18    0.26
   2  24   1   -0.02    0.21
   2  24   1   -0.19    0.20
  -2 -24  -1    0.16    0.25
   1  24   1    4.18    0.32
   1  24   1    3.43    0.34
  -1 -24  -1    3.43    0.34
   0  24   1    0.13    0.18
   0  24   1   -0.12    0.22
   0  24   1    0.20    0.23
   0 -24  -1    0.01    0.23
  -1  24   1   -0.26    0.21
  -1  24   1   -0.53    0.23
  -1  24   1    0.39    0.22
   1 -24  -1    0.49    0.26
  -2  24   1    2.45    0.32
  -2  24   1    2.39    0.26
  -2  24   1    2.38    0.29
   2 -24  -1    2.99    0.36
  -3  24   1    1.58    0.23
  -3  24   1    1.91    0.31
  -3  24   1    1.42    0.30
   3 -24  -1    1.67    0.32
  -4  24   1    4.73    0.40
  -4  24   1    4.61    0.39
   4 -24  -1    4.65    0.42
  -5  24   1    0.57    0.31
  -5  24   1    0.77    0.30
   5 -24  -1    0.37    0.34
  -6  24   1   -0.15    0.30
  -6  24   1    0.52    0.32
   6 -24  -1   -0.14    0.33
   6  25   1    0.06    0.34
   6  25   1   -0.61    0.32
  -6 -25  -1   -0.15    0.33
   5  25   1    0.04    0.33
   5  25   1   -0.22    0.29
  -5 -25  -1    0.52    0.32
   4  25   1    0.11    0.27
   4  25   1    0.07    0.26
  -4 -25  -1   -0.14    0.29
   3  25   1    0.02    0.26
   3  25   1    0.19    0.24
   3  25   1    0.02    0.21
  -3 -25  -1    0.50    0.29
   2  25   1    1.42    0.26
   2  25   1    1.43    0.30
  -2 -25  -1    1.56    0.32
   1  25   1   -0.22    0.22
   1  25   1    0.11    0.25
  -1 -25  -1   -0.21    0.25
   0  25   1    9.81    0.48
   0  25   1    9.91    0.48
   0  25   1   10.78    0.50
   0 -25  -1   10.51    0.54
  -1  25   1    1.24    0.25
  -1  25   1    1.32    0.26
  -1  25   1    1.29    0.24
   1 -25  -1    1.08    0.27
  -2  25   1    4.95    0.39
  -2  25   1    4.66    0.36
  -2  25   1    4.26    0.32
   2 -25  -1    4.21    0.40
  -3  25   1    0.58    0.28
  -3  25   1    0.47    0.21
  -3  25   1    0.21    0.27
   3 -25  -1    0.38    0.27
  -4  25   1    0.27    0.28
  -4  25   1    0.69    0.27
   4 -25  -1    0.72    0.32
  -5  25   1    0.56    0.28
  -5  25   1    0.29    0.32
   5 -25  -1    0.37    0.30
  -6  25   1    0.51    0.36
  -6  25   1   -0.45    0.30
   6 -25  -1    0.27    0.36
   5  26   1   -0.03    0.34
   5  26   1    0.17    0.31
  -5 -26  -1    0.09    0.31
   4  26   1   -0.05    0.31
   4  26   1   -0.56    0.27
  -4 -26  -1    0.79    0.31
   3  26   1    1.00    0.31
   3  26   1    0.74    0.26
   3  26   1    0.50    0.24
  -3 -26  -1    0.65    0.31
   2  26   1   -0.28    0.24
   2  26   1    0.31    0.24
  -2 -26  -1    0.17    0.25
   1  26   1    0.08    0.26
   1  26   1    0.04    0.25
  -1 -26  -1   -0.11    0.24
   0  26   1    1.22    0.25
   0  26   1    1.67    0.29
   0 -26  -1    0.99    0.30
  -1  26   1   -0.08    0.22
  -1  26   1   -0.31    0.25
  -1  26   1    0.03    0.22
   1 -26  -1    0.20    0.27
  -2  26   1    1.31    0.28
  -2  26   1    1.24    0.31
  -2  26   1    0.82    0.24
   2 -26  -1    0.97    0.28
  -3  26   1    0.26    0.28
  -3  26   1    0.38    0.28
  -3  26   1    0.23    0.23
   3 -26  -1   -0.30    0.26
  -4  26   1    1.08    0.32
  -4  26   1    0.71    0.31
   4 -26  -1    0.89    0.35
  -5  26   1    1.00    0.36
  -5  26   1    1.24    0.35
   5 -26  -1    0.48    0.36
   5  27   1    0.13    0.32
   5  27   1    0.98    0.34
  -5 -27  -1    1.02    0.35
   4  27   1   -0.16    0.28
   4  27   1    0.36    0.33
  -4 -27  -1    0.67    0.31
   3  27   1    0.04    0.23
   3  27   1   -0.13    0.29
  -3 -27  -1    0.65    0.28
   2  27   1    0.36    0.26
   2  27   1   -0.20    0.23
  -2 -27  -1    0.16    0.29
   1  27   1   -0.08    0.25
   1  27   1   -0.27    0.26
  -1 -27  -1   -0.18    0.27
   0  27   1    4.78    0.38
   0  27   1    5.69    0.40
   0 -27  -1    4.83    0.40
  -1  27   1    0.11    0.26
  -1  27   1    0.09    0.24
  -1  27   1   -0.11    0.22
   1 -27  -1   -0.05    0.28
  -2  27   1    0.36    0.24
  -2  27   1    0.39    0.29
  -2  27   1    0.28    0.27
   2 -27  -1    0.54    0.32
  -3  27   1    0.26    0.26
  -3  27   1    0.44    0.28
   3 -27  -1    0.36    0.28
  -4  27   1   -0.25    0.29
  -4  27   1    0.21    0.29
   4 -27  -1   -0.26    0.33
  -5  27   1    0.39    0.34
  -5  27   1   -0.33    0.29
   5 -27  -1   -0.08    0.33
   4  28   1   -0.23    0.29
   4  28   1   -0.25    0.31
  -4 -28  -1    0.08    0.31
   3  28   1   -0.13    0.23
   3  28   1    0.29    0.31
  -3 -28  -1    0.01    0.31
   2  28   1    1.46    0.29
   2  28   1    0.87    0.32
  -2 -28  -1    1.24    0.34
   1  28   1   -0.45    0.25
   1  28   1   -0.20    0.27
  -1 -28  -1   -0.06    0.30
   0  28   1    0.42    0.28
   0  28   1    0.69    0.28
   0 -28  -1    0.56    0.31
  -1  28   1    1.30    0.31
  -1  28   1    1.81    0.30
   1 -28  -1    1.71    0.36
  -2  28   1    0.19    0.24
  -2  28   1   -0.07    0.26
  -2  28   1    0.18    0.25
   2 -28  -1    0.26    0.30
  -3  28   1   -0.06    0.29
  -3  28   1    0.30    0.30
   3 -28  -1   -0.19    0.30
  -4  28   1    0.08    0.27
  -4  28   1    0.25    0.33
   4 -28  -1    0.02    0.34
   4  29   1    2.34    0.41
  -4 -29  -1    2.77    0.41
   3  29   1    0.46    0.33
   3  29   1    0.77    0.27
  -3 -29  -1    0.53    0.33
   2  29   1    2.08    0.31
   2  29   1    2.44    0.37
  -2 -29  -1    2.13    0.36
   1  29   1   -0.08    0.26
   1  29   1    0.00    0.28
  -1 -29  -1   -0.33    0.30
   0  29   1    0.22    0.27
   0  29   1    0.10    0.27
   0 -29  -1   -0.24    0.30
  -1  29   1    2.87    0.33
  -1  29   1    3.13    0.37
   1 -29  -1    3.64    0.42
  -2  29   1    0.28    0.28
  -2  29   1    0.55    0.26
  -2  29   1    0.13    0.29
   2 -29  -1   -0.14    0.32
  -3  29   1    0.00    0.31
  -3  29   1    0.17    0.31
   3 -29  -1    0.07    0.33
  -4  29   1    2.53    0.40
  -4  29   1    0.94    0.34
   4 -29  -1    1.67    0.38
   3  30   1    0.37    0.35
   3  30   1    0.02    0.39
  -3 -30  -1    0.28    0.33
   2  30   1    0.50    0.32
   2  30   1    0.37    0.27
  -2 -30  -1    0.87    0.33
   1  30   1    0.03    0.29
   1  30   1   -0.09    0.27
  -1 -30  -1    0.06    0.30
   0  30   1    0.80    0.30
   0  30   1    0.16    0.27
   0 -30  -1   -0.08    0.27
  -1  30   1    0.30    0.30
  -1  30   1    0.05    0.27
   1 -30  -1    0.15    0.33
  -2  30   1    0.43    0.32
  -2  30   1    0.39    0.27
  -2  30   1    0.21    0.28
   2 -30  -1   -0.09    0.30
  -3  30   1   -0.19    0.31
  -3  30   1    0.61    0.31
   3 -30  -1    0.16    0.35
   2  31   1    0.12    0.29
   2  31   1   -0.03    0.27
  -2 -31  -1    0.02    0.31
   1  31   1    0.64    0.32
   1  31   1    0.96    0.30
  -1 -31  -1    0.99    0.35
   0  31   1   -0.05    0.27
   0  31   1    0.01    0.28
   0 -31  -1    0.05    0.32
  -1  31   1    3.32    0.38
  -1  31   1    3.32    0.37
   1 -31  -1    4.12    0.45
  -2  31   1    0.07    0.30
   2 -31  -1    0.42    0.35
   0  32   1    0.29    0.29
   0  32   1   -0.07    0.30
   0 -32  -1    0.02    0.34
   0 -32   2    1.46    0.40
   0  32  -2    0.66    0.31
   0  32  -2    1.42    0.33
   2 -31   2    0.33    0.37
  -2  31  -2    0.61    0.33
   1 -31   2    0.62    0.36
  -1  31  -2    0.13    0.27
  -1  31  -2    0.13    0.31
   0 -31   2    1.86    0.39
   0  31  -2    1.71    0.33
   0  31  -2    1.16    0.32
  -1 -31   2    0.16    0.32
   1  31  -2    0.26    0.29
   1  31  -2   -0.22    0.27
  -2 -31   2    0.34    0.33
   2  31  -2    0.94    0.31
   2  31  -2    0.44    0.28
   3 -30   2    8.72    0.63
  -3  30  -2    9.02    0.59
  -3  30  -2    8.69    0.56
   2 -30   2    0.61    0.32
  -2  30  -2    1.50    0.32
  -2  30  -2    0.52    0.34
   1 -30   2    0.35    0.35
  -1  30  -2    0.28    0.27
  -1  30  -2    0.38    0.27
   0 -30   2    1.11    0.35
   0  30  -2    0.54    0.27
   0  30  -2    0.95    0.30
  -1 -30   2    0.32    0.33
   1  30  -2    0.40    0.30
   1  30  -2   -0.26    0.25
  -2 -30   2   -0.34    0.27
   2  30  -2    0.18    0.27
   2  30  -2    0.15    0.31
  -3 -30   2   -0.11    0.33
   3  30  -2    0.13    0.33
   3  30  -2    0.25    0.26
   4 -29   2   -0.66    0.32
  -4  29  -2   -0.17    0.32
  -4  29  -2    0.23    0.32
   3 -29   2    1.53    0.38
  -3  29  -2    1.36    0.35
  -3  29  -2    1.37    0.33
   2 -29   2    0.27    0.35
  -2  29  -2    0.30    0.27
  -2  29  -2   -0.07    0.27
   1 -29   2    0.48    0.34
  -1  29  -2   -0.08    0.27
  -1  29  -2   -0.26    0.24
   0 -29   2    0.85    0.30
   0  29  -2    1.53    0.31
   0  29  -2    1.07    0.28
  -1 -29   2    0.86    0.33
   1  29  -2    1.13    0.31
   1  29  -2    1.02    0.29
  -2 -29   2    0.84    0.30
   2  29  -2    0.98    0.31
   2  29  -2    0.49    0.28
  -3 -29   2   -0.07    0.30
   3  29  -2    0.26    0.26
   3  29  -2   -0.31    0.29
  -4 -29   2    0.09    0.34
   4  29  -2    0.14    0.30
   4 -28   2    0.22    0.31
  -4  28  -2    0.28    0.31
  -4  28  -2    0.17    0.32
   3 -28   2   -0.21    0.30
  -3  28  -2    0.21    0.29
  -3  28  -2    0.09    0.29
   2 -28   2    0.51    0.32
  -2  28  -2    0.43    0.25
  -2  28  -2    0.62    0.28
  -2  28  -2    0.45    0.31
   1 -28   2    0.72    0.32
  -1  28  -2    0.27    0.24
  -1  28  -2    0.53    0.29
   0 -28   2    0.24    0.30
   0  28  -2    0.35    0.25
   0  28  -2    0.26    0.24
  -1 -28   2    0.86    0.29
   1  28  -2    0.76    0.29
   1  28  -2    0.68    0.28
  -2 -28   2    0.12    0.29
   2  28  -2    0.27    0.24
   2  28  -2    0.12    0.29
  -3 -28   2    0.27    0.31
   3  28  -2    0.00    0.24
   3  28  -2   -0.30    0.30
  -4 -28   2    1.35    0.37
   4  28  -2    1.09    0.36
   4  28  -2    1.23    0.40
   5 -27   2    0.23    0.36
  -5  27  -2    0.26    0.34
  -5  27  -2   -0.43    0.29
   4 -27   2    1.86    0.38
  -4  27  -2    1.96    0.37
  -4  27  -2    2.01    0.35
   3 -27   2    0.47    0.33
  -3  27  -2    0.53    0.26
  -3  27  -2    1.09    0.31
   2 -27   2    0.78    0.32
  -2  27  -2    0.82    0.27
  -2  27  -2    1.07    0.24
  -2  27  -2    1.22    0.29
   1 -27   2   -0.28    0.28
  -1  27  -2   -0.14    0.27
  -1  27  -2    0.34    0.24
  -1  27  -2    0.36    0.23
   0 -27   2    0.10    0.29
   0  27  -2    0.17    0.24
   0  27  -2    0.20    0.24
  -1 -27   2    0.47    0.29
   1  27  -2   -0.03    0.24
   1  27  -2    0.19    0.27
  -2 -27   2    0.55    0.29
   2  27  -2    0.05    0.24
   2  27  -2    0.04    0.27
  -3 -27   2    0.44    0.29
   3  27  -2    0.48    0.31
   3  27  -2    0.69    0.25
  -4 -27   2    0.57    0.33
   4  27  -2    0.78    0.32
   4  27  -2    0.23    0.30
  -5 -27   2    0.14    0.32
   5  27  -2    0.06    0.32
   5  27  -2   -0.21    0.33
   5 -26   2   -0.27    0.33
  -5  26  -2   -0.27    0.32
  -5  26  -2    0.07    0.26
   4 -26   2    1.55    0.37
  -4  26  -2    0.97    0.31
  -4  26  -2    1.00    0.32
   3 -26   2    2.03    0.36
  -3  26  -2    2.16    0.32
  -3  26  -2    1.93    0.33
   2 -26   2    1.27    0.34
  -2  26  -2    1.53    0.32
  -2  26  -2    1.10    0.25
  -2  26  -2    1.20    0.28
   1 -26   2    0.46    0.31
  -1  26  -2    0.99    0.28
  -1  26  -2    0.51    0.23
  -1  26  -2    0.67    0.24
   0 -26   2   -0.08    0.28
   0  26  -2    0.52    0.23
   0  26  -2    0.27    0.24
  -1 -26   2    1.84    0.32
   1  26  -2    1.87    0.28
   1  26  -2    1.48    0.27
  -2 -26   2    1.31    0.31
   2  26  -2    1.15    0.25
   2  26  -2    0.91    0.30
  -3 -26   2    3.43    0.39
   3  26  -2    3.49    0.33
   3  26  -2    3.45    0.32
   3  26  -2    2.34    0.32
  -4 -26   2    0.63    0.31
   4  26  -2    0.39    0.24
   4  26  -2   -0.08    0.27
   4  26  -2    0.28    0.31
  -5 -26   2    1.14    0.35
   5  26  -2    1.11    0.35
   5  26  -2    1.08    0.35
   6 -25   2    0.48    0.33
  -6  25  -2    0.35    0.32
  -6  25  -2    0.40    0.35
   5 -25   2    0.66    0.35
  -5  25  -2    0.51    0.30
  -5  25  -2    1.21    0.36
   4 -25   2    1.68    0.37
  -4  25  -2    0.86    0.32
  -4  25  -2    1.41    0.31
   3 -25   2    0.42    0.31
  -3  25  -2    1.14    0.30
  -3  25  -2    0.35    0.28
   2 -25   2    2.35    0.34
  -2  25  -2    3.07    0.28
  -2  25  -2    3.30    0.32
  -2  25  -2    2.64    0.31
   1 -25   2    1.77    0.32
  -1  25  -2    2.00    0.26
  -1  25  -2    1.80    0.28
  -1  25  -2    1.69    0.26
   0 -25   2    0.57    0.27
   0  25  -2    0.27    0.33
   0  25  -2    0.13    0.24
   0  25  -2    0.12    0.22
  -1 -25   2    3.58    0.35
   1  25  -2    3.36    0.34
   1  25  -2    3.78    0.33
  -2 -25   2    1.23    0.30
   2  25  -2    1.34    0.27
   2  25  -2    1.66    0.27
  -3 -25   2    0.56    0.29
   3  25  -2    1.03    0.31
   3  25  -2    0.95    0.26
   3  25  -2    0.57    0.23
  -4 -25   2    0.25    0.30
   4  25  -2    0.01    0.22
   4  25  -2   -0.01    0.29
   4  25  -2   -0.25    0.26
  -5 -25   2    2.20    0.34
   5  25  -2    1.74    0.37
   5  25  -2    2.22    0.37
  -6 -25   2    0.33    0.32
   6  25  -2   -0.16    0.33
   6  25  -2   -0.19    0.35
   6 -24   2    0.60    0.37
  -6  24  -2    0.46    0.34
  -6  24  -2    0.05    0.30
   5 -24   2    0.05    0.32
  -5  24  -2   -0.09    0.24
  -5  24  -2   -0.06    0.31
   4 -24   2   -0.27    0.29
  -4  24  -2   -0.46    0.27
  -4  24  -2    0.11    0.24
   3 -24   2   -0.05    0.29
  -3  24  -2    0.08    0.26
  -3  24  -2    0.55    0.26
   2 -24   2    0.05    0.24
  -2  24  -2    0.31    0.21
  -2  24  -2    0.13    0.26
  -2  24  -2    0.61    0.25
   1 -24   2    7.63    0.45
  -1  24  -2    7.69    0.46
  -1  24  -2    8.06    0.40
  -1  24  -2    7.67    0.42
   0 -24   2   21.72    0.69
   0  24  -2   20.83    0.66
   0  24  -2   22.05    0.66
   0  24  -2   22.04    0.61
  -1 -24   2    5.37    0.39
   1  24  -2    5.59    0.40
   1  24  -2    5.41    0.41
  -2 -24   2   11.09    0.53
   2  24  -2   11.76    0.48
   2  24  -2   10.60    0.52
   2  24  -2   11.52    0.47
  -3 -24   2    0.30    0.26
   3  24  -2   -0.21    0.21
   3  24  -2   -0.13    0.23
   3  24  -2   -0.24    0.25
  -4 -24   2    0.04    0.28
   4  24  -2    0.53    0.28
   4  24  -2   -0.19    0.21
   4  24  -2    0.03    0.25
  -5 -24   2    5.53    0.46
   5  24  -2    5.65    0.47
   5  24  -2    5.10    0.44
  -6 -24   2    1.55    0.36
   6  24  -2    1.33    0.38
   6  24  -2    0.85    0.37
   7 -23   2    0.26    0.37
  -7  23  -2    0.73    0.32
  -7  23  -2    0.25    0.37
   6 -23   2    1.85    0.40
  -6  23  -2    1.80    0.38
  -6  23  -2    1.93    0.34
   5 -23   2    2.61    0.36
  -5  23  -2    3.43    0.37
  -5  23  -2    3.57    0.40
   4 -23   2    5.64    0.45
  -4  23  -2    6.70    0.49
  -4  23  -2    6.26    0.46
   3 -23   2    5.14    0.40
  -3  23  -2    5.23    0.39
  -3  23  -2    5.48    0.40
  -3  23  -2    5.13    0.34
   2 -23   2   14.15    0.57
  -2  23  -2   13.98    0.48
  -2  23  -2   15.47    0.58
  -2  23  -2   14.57    0.54
   1 -23   2    4.90    0.38
  -1  23  -2    4.44    0.33
  -1  23  -2    4.47    0.35
  -1  23  -2    4.68    0.36
   0 -23   2    1.60    0.28
   0  23  -2    1.47    0.25
   0  23  -2    2.15    0.27
   0  23  -2    1.76    0.22
  -1 -23   2    1.15    0.26
   1  23  -2    0.89    0.23
   1  23  -2    0.82    0.25
  -2 -23   2    0.88    0.26
   2  23  -2    0.61    0.21
   2  23  -2    0.58    0.21
   2  23  -2    0.33    0.24
  -3 -23   2    0.58    0.26
   3  23  -2    0.64    0.23
   3  23  -2    0.78    0.25
   3  23  -2    0.72    0.23
  -4 -23   2    0.04    0.26
   4  23  -2   -0.09    0.28
   4  23  -2    0.18    0.26
   4  23  -2    0.32    0.21
  -5 -23   2    2.88    0.37
   5  23  -2    3.52    0.38
   5  23  -2    3.21    0.36
  -6 -23   2    0.47    0.32
   6  23  -2   -0.23    0.28
   6  23  -2    0.08    0.33
  -7 -23   2    0.36    0.35
   7  23  -2    0.29    0.36
   7  23  -2   -0.27    0.34
   7 -22   2    0.41    0.36
  -7  22  -2    1.12    0.40
  -7  22  -2    0.81    0.32
   6 -22   2   11.56    0.65
  -6  22  -2   10.03    0.56
  -6  22  -2   11.94    0.65
   5 -22   2    2.29    0.36
  -5  22  -2    1.91    0.31
  -5  22  -2    1.82    0.33
   4 -22   2    0.34    0.29
  -4  22  -2    0.58    0.26
  -4  22  -2    0.50    0.27
   3 -22   2    1.26    0.29
  -3  22  -2    0.94    0.27
  -3  22  -2    1.09    0.20
  -3  22  -2    0.88    0.26
   2 -22   2    5.09    0.39
  -2  22  -2    5.18    0.37
  -2  22  -2    5.04    0.37
  -2  22  -2    4.55    0.31
   1 -22   2    0.01    0.21
  -1  22  -2    0.04    0.19
  -1  22  -2    0.23    0.19
  -1  22  -2    0.23    0.21
   0 -22   2    2.46    0.30
   0  22  -2    2.40    0.26
   0  22  -2    2.59    0.23
   0  22  -2    2.56    0.27
  -1 -22   2    2.96    0.30
   1  22  -2    3.36    0.24
   1  22  -2    2.68    0.29
   1  22  -2    3.87    0.30
  -2 -22   2    1.19    0.26
   2  22  -2    1.16    0.21
   2  22  -2    0.89    0.22
   2  22  -2    1.05    0.24
  -3 -22   2    1.74    0.29
   3  22  -2    1.66    0.24
   3  22  -2    1.21    0.25
   3  22  -2    1.66    0.29
  -4 -22   2   -0.12    0.25
   4  22  -2    0.15    0.27
   4  22  -2    0.28    0.26
   4  22  -2   -0.01    0.19
  -5 -22   2    1.14    0.31
   5  22  -2    1.90    0.35
   5  22  -2    1.40    0.32
  -6 -22   2    2.10    0.36
   6  22  -2    2.29    0.38
   6  22  -2    2.00    0.38
  -7 -22   2   -0.05    0.33
   7  22  -2    0.20    0.33
   7  22  -2    0.55    0.37
   7 -21   2    0.32    0.32
  -7  21  -2    0.93    0.37
  -7  21  -2    0.32    0.29
   6 -21   2    1.58    0.37
  -6  21  -2    1.95    0.38
  -6  21  -2    0.95    0.30
   5 -21   2    6.29    0.46
  -5  21  -2    6.32    0.46
  -5  21  -2    7.03    0.47
   4 -21   2    0.39    0.28
  -4  21  -2   -0.25    0.26
  -4  21  -2    0.15    0.24
   3 -21   2    1.86    0.30
  -3  21  -2    2.80    0.23
  -3  21  -2    2.53    0.30
  -3  21  -2    2.27    0.29
   2 -21   2    2.07    0.27
  -2  21  -2    2.61    0.28
  -2  21  -2    2.47    0.23
  -2  21  -2    2.55    0.29
   1 -21   2    0.63    0.24
  -1  21  -2    0.37    0.23
  -1  21  -2    0.82    0.21
  -1  21  -2    0.53    0.19
   0 -21   2    1.03    0.25
   0  21  -2    1.52    0.24
   0  21  -2    0.74    0.21
   0  21  -2    1.20    0.19
  -1 -21   2    1.75    0.25
   1  21  -2    1.44    0.18
   1  21  -2    1.37    0.25
   1  21  -2    1.77    0.20
   1  21  -2    1.59    0.22
  -2 -21   2    3.54    0.30
   2  21  -2    3.97    0.29
   2  21  -2    3.68    0.28
   2  21  -2    4.04    0.33
  -3 -21   2   -0.10    0.23
   3  21  -2    0.50    0.20
   3  21  -2    0.41    0.25
   3  21  -2    0.60    0.23
  -4 -21   2    0.51    0.27
   4  21  -2    0.14    0.26
   4  21  -2    0.31    0.20
   4  21  -2   -0.02    0.24
  -5 -21   2    2.32    0.34
   5  21  -2    2.10    0.33
   5  21  -2    2.07    0.35
  -6 -21   2    1.69    0.34
   6  21  -2    2.05    0.36
   6  21  -2    2.15    0.37
  -7 -21   2    0.09    0.30
   7  21  -2    0.15    0.36
   7  21  -2   -0.40    0.32
   7 -20   2    3.13    0.39
  -7  20  -2    3.61    0.37
  -7  20  -2    3.35    0.43
   6 -20   2    1.09    0.34
  -6  20  -2    0.82    0.28
  -6  20  -2    0.75    0.33
   5 -20   2    3.18    0.37
  -5  20  -2    2.55    0.29
  -5  20  -2    2.69    0.33
   4 -20   2    7.08    0.49
  -4  20  -2    6.32    0.43
  -4  20  -2    6.52    0.47
   3 -20   2    1.53    0.29
  -3  20  -2    0.69    0.22
  -3  20  -2    0.98    0.18
  -3  20  -2    0.90    0.25
   2 -20   2    4.71    0.35
  -2  20  -2    4.35    0.33
  -2  20  -2    4.60    0.30
  -2  20  -2    4.18    0.31
   1 -20   2    1.44    0.23
  -1  20  -2    2.13    0.26
  -1  20  -2    1.52    0.21
  -1  20  -2    1.74    0.22
   0 -20   2    2.88    0.27
   0  20  -2    3.05    0.23
   0  20  -2    3.34    0.27
   0  20  -2    3.48    0.22
   0  20  -2    3.22    0.28
  -1 -20   2   -0.15    0.19
   1  20  -2    0.26    0.20
   1  20  -2    0.09    0.13
   1  20  -2    0.01    0.15
   1  20  -2   -0.19    0.17
  -2 -20   2    0.22    0.21
   2  20  -2    0.32    0.18
   2  20  -2    0.15    0.22
   2  20  -2    0.21    0.18
  -3 -20   2    1.86    0.25
   3  20  -2    2.29    0.28
   3  20  -2    2.62    0.24
   3  20  -2    2.16    0.26
  -4 -20   2    1.29    0.28
   4  20  -2    1.10    0.21
   4  20  -2    1.10    0.27
   4  20  -2    1.09    0.27
  -5 -20   2    7.01    0.49
   5  20  -2    7.40    0.50
   5  20  -2    6.89    0.49
  -6 -20   2    2.02    0.35
   6  20  -2    1.12    0.33
   6  20  -2    1.85    0.32
  -7 -20   2    5.48    0.47
   7  20  -2    4.27    0.43
   7  20  -2    3.98    0.44
   8 -19   2    1.42    0.38
  -8  19  -2    1.86    0.38
  -8  19  -2    2.13    0.34
   7 -19   2    0.50    0.32
  -7  19  -2    0.45    0.28
  -7  19  -2    0.19    0.32
   6 -19   2    0.40    0.32
  -6  19  -2    0.50    0.26
  -6  19  -2    0.43    0.28
   5 -19   2    0.18    0.25
  -5  19  -2    0.25    0.25
  -5  19  -2    0.39    0.24
   4 -19   2    1.74    0.30
  -4  19  -2    1.65    0.27
  -4  19  -2    1.25    0.26
   3 -19   2    0.66    0.25
  -3  19  -2    0.86    0.17
  -3  19  -2    0.99    0.25
  -3  19  -2    0.70    0.23
   2 -19   2    0.25    0.22
  -2  19  -2   -0.15    0.19
  -2  19  -2   -0.05    0.20
  -2  19  -2   -0.14    0.15
   1 -19   2    9.58    0.42
  -1  19  -2    8.73    0.36
  -1  19  -2    8.30    0.36
  -1  19  -2    8.71    0.38
   0 -19   2   -0.16    0.18
   0  19  -2    0.06    0.12
   0  19  -2    0.24    0.18
   0  19  -2    0.15    0.15
   0  19  -2    0.29    0.20
  -1 -19   2   -0.22    0.16
   1  19  -2   -0.10    0.13
   1  19  -2   -0.06    0.19
   1  19  -2    0.03    0.14
   1  19  -2    0.13    0.18
  -2 -19   2    0.17    0.20
   2  19  -2    0.13    0.20
   2  19  -2    0.66    0.19
   2  19  -2    0.28    0.17
  -3 -19   2   -0.21    0.20
   3  19  -2    0.04    0.16
   3  19  -2   -0.24    0.19
   3  19  -2    0.19    0.22
  -4 -19   2    0.82    0.27
   4  19  -2    1.21    0.20
   4  19  -2    0.77    0.25
   4  19  -2    0.90    0.24
  -5 -19   2    6.80    0.44
   5  19  -2    7.14    0.48
   5  19  -2    6.87    0.44
  -6 -19   2    1.92    0.33
   6  19  -2    1.94    0.35
   6  19  -2    1.78    0.35
  -7 -19   2    1.53    0.35
   7  19  -2    1.60    0.39
   7  19  -2    1.62    0.34
  -8 -19   2    0.04    0.34
   8  19  -2    0.11    0.32
   8  19  -2   -0.06    0.34
   8 -18   2   -0.41    0.33
  -8  18  -2    0.09    0.35
  -8  18  -2    0.24    0.27
   7 -18   2    1.76    0.36
  -7  18  -2    2.34    0.37
  -7  18  -2    2.49    0.33
   6 -18   2    9.34    0.56
  -6  18  -2   10.06    0.58
  -6  18  -2    9.88    0.50
   5 -18   2   13.28    0.60
  -5  18  -2   13.90    0.59
  -5  18  -2   13.01    0.54
   4 -18   2   29.31    0.82
  -4  18  -2   28.80    0.79
  -4  18  -2   28.18    0.80
   3 -18   2    8.83    0.45
  -3  18  -2    7.65    0.41
  -3  18  -2    8.37    0.43
  -3  18  -2    8.57    0.33
   2 -18   2    2.97    0.27
  -2  18  -2    2.92    0.27
  -2  18  -2    2.89    0.26
  -2  18  -2    3.34    0.26
   1 -18   2    0.21    0.20
  -1  18  -2    0.25    0.16
  -1  18  -2    0.19    0.09
  -1  18  -2    0.16    0.16
  -1  18  -2    0.29    0.20
   0 -18   2    0.65    0.20
   0  18  -2    0.70    0.15
   0  18  -2    0.45    0.19
   0  18  -2    0.78    0.18
   0  18  -2    0.78    0.13
  -1 -18   2    0.40    0.18
   1  18  -2    0.63    0.20
   1  18  -2    0.84    0.16
   1  18  -2    0.56    0.16
   1  18  -2    0.73    0.13
  -2 -18   2    0.47    0.19
  -2 -18   2    0.14    0.11
   2  18  -2    0.18    0.17
   2  18  -2    0.16    0.16
   2  18  -2    0.21    0.10
   2  18  -2    0.31    0.19
  -3 -18   2    0.95    0.23
   3  18  -2    0.86    0.18
   3  18  -2    0.60    0.20
   3  18  -2    0.35    0.22
  -4 -18   2    0.29    0.20
   4  18  -2    0.43    0.23
   4  18  -2    0.03    0.21
   4  18  -2    0.10    0.16
  -5 -18   2    5.85    0.45
   5  18  -2    5.63    0.45
   5  18  -2    6.50    0.41
   5  18  -2    5.84    0.32
  -6 -18   2   10.30    0.55
   6  18  -2   10.36    0.59
   6  18  -2   10.87    0.56
  -7 -18   2    3.31    0.40
   7  18  -2    3.06    0.38
   7  18  -2    3.60    0.40
  -8 -18   2    0.40    0.34
   8  18  -2    0.88    0.38
   8  18  -2   -0.15    0.31
   8 -17   2    0.70    0.35
  -8  17  -2    0.52    0.36
  -8  17  -2    0.59    0.27
   7 -17   2    0.04    0.31
  -7  17  -2    0.15    0.26
  -7  17  -2    0.65    0.32
   6 -17   2    3.23    0.37
  -6  17  -2    3.84    0.34
  -6  17  -2    2.90    0.36
   5 -17   2    0.19    0.24
  -5  17  -2    0.36    0.22
  -5  17  -2   -0.01    0.27
   4 -17   2    3.98    0.34
  -4  17  -2    4.12    0.32
  -4  17  -2    4.33    0.26
  -4  17  -2    4.09    0.34
   3 -17   2    5.75    0.39
  -3  17  -2    4.98    0.32
  -3  17  -2    5.29    0.26
  -3  17  -2    5.14    0.38
   2 -17   2    0.03    0.17
  -2  17  -2    0.08    0.18
  -2  17  -2    0.47    0.19
  -2  17  -2    0.09    0.14
   1 -17   2   -0.15    0.17
  -1  17  -2   -0.13    0.16
  -1  17  -2    0.05    0.08
  -1  17  -2   -0.32    0.15
  -1  17  -2    0.33    0.16
   0 -17   2   13.88    0.48
   0  17  -2   14.80    0.46
   0  17  -2   14.93    0.45
   0  17  -2   15.18    0.39
   0  17  -2   14.76    0.42
  -1 -17   2    5.40    0.26
  -1 -17   2    5.45    0.33
   1  17  -2    5.14    0.23
   1  17  -2    4.83    0.27
   1  17  -2    4.70    0.32
   1  17  -2    5.25    0.30
  -2 -17   2   12.51    0.45
  -2 -17   2   12.27    0.31
  -2 -17   2   12.04    0.41
   2  17  -2   12.92    0.43
   2  17  -2   11.98    0.45
   2  17  -2   12.19    0.41
   2  17  -2   12.80    0.31
  -3 -17   2   12.88    0.49
  -3 -17   2   14.12    0.48
   3  17  -2   13.75    0.48
   3  17  -2   12.97    0.49
   3  17  -2   12.89    0.43
  -4 -17   2    1.57    0.26
   4  17  -2    1.95    0.27
   4  17  -2    1.82    0.19
   4  17  -2    2.03    0.27
  -5 -17   2    9.82    0.49
   5  17  -2   10.54    0.52
   5  17  -2    9.82    0.46
   5  17  -2    9.81    0.36
  -6 -17   2    0.30    0.27
   6  17  -2    0.18    0.29
   6  17  -2    0.15    0.26
  -7 -17   2    2.61    0.37
   7  17  -2    2.97    0.40
   7  17  -2    2.34    0.34
  -8 -17   2   -0.43    0.32
   8  17  -2    0.01    0.30
   8  17  -2    0.47    0.38
   8 -16   2   -0.51    0.31
  -8  16  -2    0.08    0.33
  -8  16  -2   -0.04    0.25
   7 -16   2    0.23    0.27
  -7  16  -2    0.00    0.24
  -7  16  -2    0.53    0.31
   6 -16   2   15.73    0.62
  -6  16  -2   13.90    0.55
  -6  16  -2   14.44    0.58
   5 -16   2    0.60    0.27
  -5  16  -2    0.45    0.23
  -5  16  -2    0.64    0.28
   4 -16   2   12.23    0.48
  -4  16  -2   11.56    0.35
  -4  16  -2   11.66    0.50
  -4  16  -2   11.34    0.46
   3 -16   2    6.52    0.35
  -3  16  -2    7.89    0.28
  -3  16  -2    6.52    0.35
  -3  16  -2    6.41    0.36
   2 -16   2   35.17    0.84
  -2  16  -2   32.90    0.82
  -2  16  -2   35.12    0.76
  -2  16  -2   32.84    0.81
   1 -16   2   22.82    0.62
  -1  16  -2   22.96    0.60
  -1  16  -2   23.28    0.48
  -1  16  -2   22.61    0.58
  -1  16  -2   22.23    0.58
   0 -16   2    2.39    0.23
   0  16  -2    2.76    0.22
   0  16  -2    2.24    0.18
   0  16  -2    2.35    0.18
   0  16  -2    2.09    0.19
  -1 -16   2    0.14    0.13
  -1 -16   2    0.08    0.15
   1  16  -2    0.28    0.17
   1  16  -2    0.41    0.14
   1  16  -2    0.57    0.16
   1  16  -2    0.14    0.11
  -2 -16   2    4.15    0.27
  -2 -16   2    4.55    0.31
   2  16  -2    4.27    0.17
   2  16  -2    4.23    0.29
   2  16  -2    4.27    0.29
   2  16  -2    3.84    0.26
  -3 -16   2    0.29    0.18
  -3 -16   2    0.09    0.17
   3  16  -2    0.22    0.19
   3  16  -2    0.27    0.20
   3  16  -2    0.35    0.15
  -4 -16   2   -0.06    0.21
  -4 -16   2    0.29    0.21
   4  16  -2    0.40    0.22
   4  16  -2    0.50    0.15
   4  16  -2    0.25    0.22
  -5 -16   2    1.77    0.26
   5  16  -2    1.74    0.26
   5  16  -2    2.13    0.31
   5  16  -2    2.09    0.20
  -6 -16   2    3.88    0.37
   6  16  -2    2.97    0.31
   6  16  -2    4.73    0.39
  -7 -16   2    0.64    0.31
   7  16  -2    0.52    0.29
   7  16  -2    0.54    0.34
  -8 -16   2    1.08    0.36
   8  16  -2    0.39    0.31
   8  16  -2    1.11    0.40
   8 -15   2   -0.16    0.32
  -8  15  -2    0.14    0.25
  -8  15  -2   -0.09    0.32
   7 -15   2    1.66    0.35
  -7  15  -2    1.70    0.28
  -7  15  -2    1.48    0.31
   6 -15   2   10.16    0.54
  -6  15  -2   10.09    0.54
  -6  15  -2    9.43    0.45
   5 -15   2    6.83    0.45
  -5  15  -2    6.59    0.45
  -5  15  -2    6.84    0.39
   4 -15   2   10.48    0.46
  -4  15  -2    8.87    0.38
  -4  15  -2    9.53    0.30
  -4  15  -2   10.24    0.47
   3 -15   2    0.44    0.21
  -3  15  -2    0.47    0.21
  -3  15  -2    0.33    0.19
  -3  15  -2    0.22    0.12
   2 -15   2    1.72    0.21
  -2  15  -2    1.57    0.19
  -2  15  -2    1.89    0.17
  -2  15  -2    2.12    0.23
   1 -15   2    0.85    0.19
  -1  15  -2    0.74    0.16
  -1  15  -2    0.77    0.16
  -1  15  -2    0.68    0.09
  -1  15  -2    0.60    0.18
   0 -15   2    5.21    0.21
   0 -15   2    5.55    0.29
   0  15  -2    5.47    0.30
   0  15  -2    5.52    0.28
   0  15  -2    5.33    0.23
   0  15  -2    5.73    0.26
  -1 -15   2    9.25    0.36
  -1 -15   2    8.45    0.30
   1  15  -2    8.90    0.36
   1  15  -2    8.95    0.28
   1  15  -2    8.52    0.31
   1  15  -2    8.35    0.32
  -2 -15   2    1.59    0.21
  -2 -15   2    1.88    0.19
   2  15  -2    1.64    0.19
   2  15  -2    1.59    0.20
   2  15  -2    1.49    0.17
   2  15  -2    1.60    0.11
  -3 -15   2   17.98    0.53
  -3 -15   2   17.40    0.54
   3  15  -2   17.18    0.53
   3  15  -2   16.18    0.51
   3  15  -2   17.12    0.47
  -4 -15   2    2.86    0.27
  -4 -15   2    2.73    0.26
   4  15  -2    3.87    0.30
   4  15  -2    2.77    0.28
   4  15  -2    3.06    0.21
  -5 -15   2   18.93    0.64
   5  15  -2   20.29    0.52
   5  15  -2   20.70    0.67
   5  15  -2   21.11    0.65
  -6 -15   2    3.36    0.32
   6  15  -2    3.50    0.37
   6  15  -2    2.96    0.31
  -7 -15   2    0.59    0.29
   7  15  -2    0.52    0.33
   7  15  -2    0.26    0.28
  -8 -15   2    4.34    0.41
   8  15  -2    5.04    0.42
   8  15  -2    5.20    0.50
  -9 -15   2    0.25    0.34
   9  15  -2    0.73    0.33
   9  15  -2    0.72    0.38
   9 -14   2    0.39    0.38
  -9  14  -2    0.40    0.35
   8 -14   2   -0.30    0.28
  -8  14  -2   -0.07    0.25
  -8  14  -2   -0.22    0.30
   7 -14   2   -0.02    0.27
  -7  14  -2    0.40    0.29
  -7  14  -2   -0.08    0.22
   6 -14   2    9.47    0.51
  -6  14  -2    8.94    0.47
  -6  14  -2    8.42    0.43
   5 -14   2    0.25    0.24
  -5  14  -2   -0.12    0.20
  -5  14  -2    0.32    0.20
   4 -14   2   -0.35    0.18
  -4  14  -2   -0.21    0.17
  -4  14  -2    0.06    0.10
  -4  14  -2    0.01    0.21
   3 -14   2    4.22    0.29
  -3  14  -2    4.24    0.29
  -3  14  -2    3.98    0.30
  -3  14  -2    3.66    0.21
   2 -14   2   16.22    0.50
  -2  14  -2   16.05    0.49
  -2  14  -2   16.50    0.42
  -2  14  -2   15.62    0.48
   1 -14   2   -0.06    0.14
  -1  14  -2    0.19    0.14
  -1  14  -2    0.21    0.13
  -1  14  -2    0.26    0.15
  -1  14  -2    0.07    0.07
   0 -14   2    0.48    0.16
   0 -14   2    0.43    0.11
   0  14  -2    0.18    0.14
   0  14  -2    0.54    0.13
   0  14  -2    0.40    0.11
   0  14  -2    0.38    0.15
  -1 -14   2   24.69    0.63
  -1 -14   2   24.19    0.58
   1  14  -2   25.49    0.55
   1  14  -2   24.43    0.58
   1  14  -2   24.59    0.62
   1  14  -2   24.90    0.60
  -2 -14   2    0.51    0.16
  -2 -14   2    0.59    0.18
   2  14  -2    0.59    0.16
   2  14  -2    0.59    0.08
   2  14  -2    0.70    0.19
   2  14  -2    0.79    0.15
  -3 -14   2    1.30    0.20
  -3 -14   2    1.02    0.18
   3  14  -2    1.17    0.20
   3  14  -2    0.74    0.19
   3  14  -2    1.00    0.16
  -4 -14   2    0.83    0.21
  -4 -14   2    0.54    0.19
   4  14  -2    0.59    0.22
   4  14  -2    0.72    0.15
   4  14  -2    0.93    0.20
  -5 -14   2   26.22    0.75
  -5 -14   2   23.82    0.71
   5  14  -2   24.79    0.59
   5  14  -2   23.57    0.73
   5  14  -2   25.23    0.72
  -6 -14   2    7.35    0.46
   6  14  -2    8.14    0.43
   6  14  -2    7.82    0.46
  -7 -14   2    0.82    0.29
   7  14  -2    0.66    0.28
   7  14  -2    0.35    0.31
  -8 -14   2   -0.17    0.30
   8  14  -2   -0.04    0.28
   8  14  -2    0.38    0.35
  -9 -14   2    1.57    0.39
   9  14  -2    1.12    0.41
   9  14  -2    1.75    0.35
   9 -13   2    0.88    0.38
  -9  13  -2    0.26    0.34
   8 -13   2    1.76    0.37
  -8  13  -2    1.05    0.33
   7 -13   2    0.67    0.30
  -7  13  -2    0.76    0.30
  -7  13  -2    0.26    0.22
   6 -13   2    1.58    0.31
  -6  13  -2    1.64    0.24
  -6  13  -2    1.99    0.32
   5 -13   2    1.41    0.24
  -5  13  -2    1.22    0.21
  -5  13  -2    1.11    0.23
   4 -13   2    6.36    0.37
  -4  13  -2    6.13    0.33
  -4  13  -2    6.63    0.38
  -4  13  -2    6.30    0.23
   3 -13   2    0.14    0.18
  -3  13  -2    0.40    0.17
  -3  13  -2    0.29    0.19
  -3  13  -2   -0.02    0.10
   2 -13   2    1.27    0.20
  -2  13  -2    0.91    0.13
  -2  13  -2    0.74    0.16
  -2  13  -2    0.94    0.18
   1 -13   2   15.82    0.46
  -1  13  -2   15.18    0.43
  -1  13  -2   15.76    0.34
  -1  13  -2   15.67    0.42
  -1  13  -2   15.65    0.46
   0 -13   2    0.04    0.10
   0 -13   2   -0.04    0.14
   0  13  -2    0.23    0.12
   0  13  -2    0.41    0.14
   0  13  -2    0.15    0.15
   0  13  -2    0.24    0.10
  -1 -13   2    0.83    0.17
  -1 -13   2    0.92    0.14
   1  13  -2    0.64    0.14
   1  13  -2    1.30    0.12
   1  13  -2    0.68    0.15
   1  13  -2    0.85    0.14
  -2 -13   2   16.03    0.47
  -2 -13   2   15.40    0.45
   2  13  -2   15.91    0.45
   2  13  -2   15.96    0.34
   2  13  -2   15.60    0.43
   2  13  -2   15.89    0.46
  -3 -13   2    0.61    0.17
  -3 -13   2    0.71    0.19
   3  13  -2    0.75    0.14
   3  13  -2    0.70    0.18
   3  13  -2    0.46    0.19
  -4 -13   2    6.79    0.37
  -4 -13   2    7.90    0.39
   4  13  -2    7.00    0.38
   4  13  -2    7.78    0.39
   4  13  -2    7.43    0.28
  -5 -13   2   17.41    0.58
  -5 -13   2   19.81    0.62
   5  13  -2   17.21    0.60
   5  13  -2   17.60    0.47
   5  13  -2   18.66    0.59
  -6 -13   2    2.93    0.30
   6  13  -2    3.53    0.35
   6  13  -2    3.45    0.31
  -7 -13   2    1.11    0.30
   7  13  -2    1.10    0.32
   7  13  -2    1.41    0.28
  -8 -13   2    2.25    0.37
   8  13  -2    1.85    0.32
   8  13  -2    2.48    0.40
  -9 -13   2    1.88    0.36
   9  13  -2    1.95    0.43
   9  13  -2    2.02    0.35
   9 -12   2    1.47    0.39
  -9  12  -2    1.04    0.37
   8 -12   2   -0.15    0.30
  -8  12  -2   -0.04    0.29
   7 -12   2   -0.13    0.28
  -7  12  -2    0.20    0.28
  -7  12  -2    0.17    0.21
   6 -12   2    4.27    0.36
  -6  12  -2    3.38    0.34
  -6  12  -2    4.12    0.30
   5 -12   2    8.14    0.44
  -5  12  -2    7.70    0.37
  -5  12  -2    8.39    0.43
   4 -12   2    2.79    0.12
   4 -12   2    2.57    0.25
  -4  12  -2    2.33    0.16
  -4  12  -2    2.45    0.23
  -4  12  -2    2.65    0.25
   3 -12   2   -0.16    0.15
  -3  12  -2    0.05    0.15
  -3  12  -2   -0.02    0.09
  -3  12  -2    0.27    0.17
   2 -12   2   11.80    0.40
  -2  12  -2   11.23    0.39
  -2  12  -2   11.40    0.33
  -2  12  -2   11.09    0.39
   1 -12   2   59.25    1.14
   1 -12   2   61.00    1.25
  -1  12  -2   59.35    1.23
  -1  12  -2   58.43    1.22
  -1  12  -2   60.14    1.21
  -1  12  -2   59.50    1.14
   0 -12   2   18.46    0.42
   0 -12   2   18.05    0.48
   0  12  -2   18.75    0.42
   0  12  -2   18.17    0.47
   0  12  -2   17.97    0.48
   0  12  -2   18.11    0.45
  -1 -12   2  192.20    3.70
  -1 -12   2  193.35    3.67
   1  12  -2  193.74    3.70
   1  12  -2  191.91    3.63
   1  12  -2  193.54    3.67
   1  12  -2  192.45    3.68
  -2 -12   2    3.86    0.27
  -2 -12   2    3.79    0.25
   2  12  -2    4.20    0.26
   2  12  -2    4.12    0.26
   2  12  -2    3.81    0.24
   2  12  -2    4.22    0.13
  -3 -12   2    0.77    0.19
  -3 -12   2    0.75    0.18
   3  12  -2    0.79    0.19
   3  12  -2    0.70    0.13
   3  12  -2    0.88    0.20
  -4 -12   2    0.41    0.20
  -4 -12   2    0.33    0.19
   4  12  -2    0.29    0.12
   4  12  -2    0.43    0.20
   4  12  -2    0.24    0.19
  -5 -12   2    9.90    0.45
  -5 -12   2   10.82    0.48
   5  12  -2   10.77    0.45
   5  12  -2    9.47    0.32
   5  12  -2    9.79    0.46
  -6 -12   2    2.95    0.31
   6  12  -2    3.08    0.34
   6  12  -2    3.29    0.31
  -7 -12   2    3.30    0.33
   7  12  -2    4.13    0.40
   7  12  -2    3.77    0.33
  -8 -12   2    0.70    0.33
   8  12  -2    1.06    0.32
   8  12  -2    1.45    0.31
  -9 -12   2   -0.23    0.32
   9  12  -2    0.32    0.30
   9  12  -2    0.57    0.35
   9 -11   2   -0.20    0.33
  -9  11  -2   -0.19    0.32
   8 -11   2    0.58    0.32
  -8  11  -2    0.11    0.30
   7 -11   2    3.27    0.37
  -7  11  -2    2.39    0.26
  -7  11  -2    2.14    0.33
   6 -11   2    1.25    0.26
  -6  11  -2    1.08    0.25
  -6  11  -2    1.76    0.23
   5 -11   2    2.69    0.22
   5 -11   2    3.88    0.31
  -5  11  -2    3.12    0.27
  -5  11  -2    3.37    0.25
   4 -11   2    3.49    0.26
   4 -11   2    2.88    0.15
  -4  11  -2    3.94    0.32
  -4  11  -2    3.93    0.17
  -4  11  -2    3.48    0.26
   3 -11   2   11.17    0.38
  -3  11  -2   11.48    0.37
  -3  11  -2   11.33    0.41
  -3  11  -2   11.65    0.30
   2 -11   2    4.80    0.29
  -2  11  -2    4.18    0.28
  -2  11  -2    4.50    0.20
  -2  11  -2    4.05    0.27
   1 -11   2   10.42    0.24
   1 -11   2   10.67    0.35
  -1  11  -2   10.17    0.24
  -1  11  -2   10.13    0.34
  -1  11  -2   10.73    0.35
  -1  11  -2   10.68    0.32
   0 -11   2    5.41    0.25
   0 -11   2    5.23    0.20
   0  11  -2    5.11    0.24
   0  11  -2    5.26    0.23
   0  11  -2    5.17    0.21
   0  11  -2    5.01    0.25
  -1 -11   2    6.72    0.26
  -1 -11   2    6.35    0.27
   1  11  -2    6.63    0.27
   1  11  -2    6.96    0.26
   1  11  -2    7.09    0.22
   1  11  -2    6.64    0.29
  -2 -11   2   24.55    0.60
  -2 -11   2   25.09    0.61
   2  11  -2   24.59    0.61
   2  11  -2   24.48    0.48
   2  11  -2   24.37    0.57
   2  11  -2   25.10    0.60
  -3 -11   2    0.02    0.17
  -3 -11   2   -0.26    0.15
   3  11  -2   -0.24    0.16
   3  11  -2   -0.13    0.17
   3  11  -2    0.11    0.11
  -4 -11   2    0.79    0.20
  -4 -11   2    0.66    0.20
   4  11  -2    0.79    0.13
   4  11  -2    0.85    0.20
   4  11  -2    0.63    0.21
  -5 -11   2    2.58    0.27
  -5 -11   2    2.36    0.27
   5  11  -2    2.25    0.25
   5  11  -2    2.32    0.25
   5  11  -2    2.75    0.21
  -6 -11   2    1.18    0.25
   6  11  -2    1.17    0.29
   6  11  -2    1.43    0.27
  -7 -11   2   -0.06    0.27
   7  11  -2    0.10    0.29
   7  11  -2    0.12    0.24
  -8 -11   2   -0.16    0.30
   8  11  -2    0.28    0.26
   8  11  -2    0.42    0.33
  -9 -11   2    1.39    0.38
   9  11  -2    1.63    0.41
   9  11  -2    1.33    0.32
   9 -10   2    0.28    0.34
  -9  10  -2    0.29    0.33
  -9  10  -2    0.23    0.34
   8 -10   2   -0.08    0.26
  -8  10  -2   -0.11    0.26
  -8  10  -2   -0.12    0.28
   7 -10   2    1.73    0.32
  -7  10  -2    1.56    0.31
  -7  10  -2    1.72    0.32
  -7  10  -2    1.98    0.24
   6 -10   2    0.80    0.27
  -6  10  -2    0.83    0.26
  -6  10  -2    0.88    0.20
   5 -10   2    0.79    0.23
   5 -10   2    0.51    0.12
  -5  10  -2    0.56    0.21
  -5  10  -2    0.55    0.10
  -5  10  -2    0.93    0.18
   4 -10   2    2.15    0.23
   4 -10   2    1.88    0.12
  -4  10  -2    2.10    0.14
  -4  10  -2    1.76    0.18
  -4  10  -2    2.17    0.24
   3 -10   2    0.94    0.07
   3 -10   2    0.62    0.18
  -3  10  -2    0.79    0.15
  -3  10  -2    0.73    0.10
  -3  10  -2    0.64    0.19
   2 -10   2    0.65    0.17
  -2  10  -2    0.68    0.16
  -2  10  -2    0.54    0.17
  -2  10  -2    0.63    0.11
   1 -10   2    1.37    0.18
   1 -10   2    1.35    0.10
  -1  10  -2    1.25    0.15
  -1  10  -2    1.38    0.14
  -1  10  -2    1.24    0.08
  -1  10  -2    1.23    0.16
   0 -10   2   18.88    0.47
   0 -10   2   19.45    0.43
   0  10  -2   19.28    0.47
   0  10  -2   18.62    0.47
   0  10  -2   19.60    0.43
   0  10  -2   18.65    0.45
  -1 -10   2    8.95    0.30
  -1 -10   2    8.46    0.29
   1  10  -2    8.55    0.31
   1  10  -2    9.00    0.29
   1  10  -2    9.12    0.29
   1  10  -2    8.93    0.24
  -2 -10   2    0.30    0.14
  -2 -10   2    0.31    0.16
   2  10  -2    0.40    0.15
   2  10  -2    0.21    0.12
   2  10  -2    0.23    0.14
  -3 -10   2    2.29    0.22
  -3 -10   2    1.82    0.20
   3  10  -2    1.63    0.18
   3  10  -2    1.75    0.15
   3  10  -2    1.71    0.20
  -4 -10   2    3.33    0.26
  -4 -10   2    4.16    0.30
   4  10  -2    2.88    0.23
   4  10  -2    3.33    0.25
   4  10  -2    3.51    0.20
  -5 -10   2    0.63    0.21
  -5 -10   2    0.40    0.20
   5  10  -2    0.59    0.22
   5  10  -2    0.61    0.21
   5  10  -2    0.62    0.13
  -6 -10   2    2.23    0.28
  -6 -10   2    2.14    0.29
   6  10  -2    2.22    0.25
   6  10  -2    2.09    0.30
  -7 -10   2    0.59    0.25
   7  10  -2    0.11    0.24
   7  10  -2    0.04    0.28
  -8 -10   2    1.51    0.32
   8  10  -2    1.35    0.34
   8  10  -2    1.28    0.28
  -9 -10   2   -0.31    0.31
   9  10  -2   -0.28    0.33
   9  10  -2    0.27    0.29
   9  -9   2   -0.32    0.32
  -9   9  -2   -0.17    0.33
  -9   9  -2    0.22    0.32
   8  -9   2    0.26    0.31
  -8   9  -2    0.36    0.28
  -8   9  -2    0.45    0.30
   7  -9   2    2.47    0.33
  -7   9  -2    2.45    0.24
  -7   9  -2    2.42    0.32
  -7   9  -2    2.32    0.32
   6  -9   2    1.45    0.18
   6  -9   2    1.70    0.27
  -6   9  -2    1.59    0.27
  -6   9  -2    1.38    0.20
  -6   9  -2    1.73    0.28
   5  -9   2    0.62    0.13
   5  -9   2    1.20    0.23
  -5   9  -2    1.20    0.23
  -5   9  -2    1.13    0.18
  -5   9  -2    1.25    0.11
  -5   9  -2    1.13    0.22
   4  -9   2   10.80    0.41
   4  -9   2   10.54    0.29
  -4   9  -2   10.91    0.27
  -4   9  -2   10.78    0.42
  -4   9  -2   11.13    0.36
   3  -9   2    0.17    0.15
   3  -9   2   -0.07    0.07
  -3   9  -2    0.22    0.08
  -3   9  -2    0.07    0.14
  -3   9  -2    0.12    0.15
   2  -9   2   23.10    0.57
  -2   9  -2   22.84    0.57
  -2   9  -2   23.62    0.56
  -2   9  -2   23.39    0.50
   1  -9   2   57.93    1.12
   1  -9   2   58.75    1.20
  -1   9  -2   59.39    1.19
  -1   9  -2   59.76    1.19
  -1   9  -2   58.78    1.16
   0  -9   2   12.15    0.30
   0  -9   2   11.90    0.36
   0   9  -2   11.64    0.35
   0   9  -2   11.33    0.32
   0   9  -2   11.67    0.29
   0   9  -2   11.98    0.34
  -1  -9   2   30.88    0.67
  -1  -9   2   31.41    0.70
   1   9  -2   32.04    0.68
   1   9  -2   32.00    0.69
   1   9  -2   30.96    0.63
   1   9  -2   31.63    0.68
  -2  -9   2   26.28    0.62
  -2  -9   2   26.92    0.63
   2   9  -2   26.54    0.62
   2   9  -2   26.37    0.58
   2   9  -2   26.85    0.62
  -3  -9   2    1.39    0.19
  -3  -9   2    1.24    0.19
   3   9  -2    1.30    0.13
   3   9  -2    1.25    0.18
   3   9  -2    1.39    0.19
  -4  -9   2    0.21    0.17
  -4  -9   2   -0.10    0.17
   4   9  -2    0.06    0.16
   4   9  -2   -0.15    0.18
   4   9  -2   -0.07    0.10
  -5  -9   2    1.75    0.23
  -5  -9   2    1.47    0.22
   5   9  -2    1.77    0.14
   5   9  -2    1.85    0.23
   5   9  -2    1.72    0.25
  -6  -9   2   13.55    0.50
  -6  -9   2   14.12    0.53
   6   9  -2   14.92    0.54
   6   9  -2   15.34    0.43
   6   9  -2   14.08    0.51
  -7  -9   2    6.67    0.46
   7   9  -2    6.30    0.49
   7   9  -2    6.35    0.41
  -8  -9   2    0.79    0.31
   8   9  -2    0.27    0.32
   8   9  -2    0.40    0.26
  -9  -9   2    1.45    0.35
   9   9  -2    1.09    0.37
   9   9  -2    1.89    0.32
   9  -8   2    0.65    0.34
  -9   8  -2    0.60    0.32
  -9   8  -2    0.66    0.34
   8  -8   2    0.24    0.30
  -8   8  -2    0.78    0.29
  -8   8  -2    0.67    0.30
   7  -8   2    5.26    0.39
  -7   8  -2    4.56    0.36
  -7   8  -2    4.44    0.36
  -7   8  -2    5.57    0.32
   6  -8   2   -0.38    0.14
   6  -8   2    0.14    0.22
  -6   8  -2    0.26    0.17
  -6   8  -2    0.06    0.22
  -6   8  -2    0.18    0.20
   5  -8   2   30.18    0.77
   5  -8   2   29.78    0.62
   5  -8   2   29.96    0.67
  -5   8  -2   29.85    0.62
  -5   8  -2   29.95    0.77
  -5   8  -2   28.20    0.74
  -5   8  -2   29.86    0.70
   4  -8   2    0.34    0.18
   4  -8   2    0.05    0.10
  -4   8  -2    0.14    0.08
  -4   8  -2    0.41    0.19
  -4   8  -2    0.32    0.14
  -4   8  -2   -0.06    0.17
   3  -8   2    3.09    0.15
   3  -8   2    3.91    0.27
  -3   8  -2    4.06    0.28
  -3   8  -2    4.06    0.15
  -3   8  -2    3.60    0.23
   2  -8   2    0.37    0.05
   2  -8   2    0.34    0.06
   2  -8   2    0.32    0.16
  -2   8  -2    0.24    0.08
  -2   8  -2    0.31    0.06
  -2   8  -2    0.16    0.14
  -2   8  -2    0.45    0.14
   1  -8   2   10.99    0.24
   1  -8   2   11.40    0.35
  -1   8  -2   11.04    0.34
  -1   8  -2   11.32    0.29
  -1   8  -2   10.95    0.32
   0  -8   2    0.09    0.14
   0  -8   2    0.20    0.09
   0   8  -2    0.17    0.11
   0   8  -2    0.05    0.12
   0   8  -2    0.22    0.11
  -1  -8   2    7.34    0.28
  -1  -8   2    7.27    0.26
   1   8  -2    7.70    0.26
   1   8  -2    6.97    0.20
   1   8  -2    7.44    0.27
   1   8  -2    7.61    0.28
  -2  -8   2   15.73    0.43
  -2  -8   2   16.20    0.43
   2   8  -2   15.58    0.43
   2   8  -2   15.08    0.43
   2   8  -2   15.30    0.38
  -3  -8   2   11.53    0.36
  -3  -8   2   11.49    0.39
   3   8  -2   11.82    0.40
   3   8  -2   11.31    0.31
   3   8  -2   11.63    0.36
  -4  -8   2   18.61    0.52
  -4  -8   2   18.01    0.54
   4   8  -2   19.11    0.55
   4   8  -2   19.89    0.53
   4   8  -2   18.92    0.44
  -5  -8   2    0.02    0.18
  -5  -8   2    0.05    0.17
  -5  -8   2    0.12    0.08
   5   8  -2    0.26    0.08
   5   8  -2    0.28    0.11
   5   8  -2    0.16    0.21
   5   8  -2    0.26    0.18
  -6  -8   2   17.65    0.60
  -6  -8   2   18.47    0.62
   6   8  -2   19.07    0.57
   6   8  -2   18.44    0.45
   6   8  -2   18.59    0.63
  -7  -8   2    0.98    0.27
   7   8  -2    1.18    0.25
   7   8  -2    0.67    0.29
  -8  -8   2    0.12    0.25
   8   8  -2    0.44    0.24
   8   8  -2    0.06    0.30
  -9  -8   2    0.40    0.32
   9   8  -2   -0.19    0.25
   9   8  -2   -0.06    0.33
   9  -7   2    0.20    0.31
  -9   7  -2   -0.26    0.29
  -9   7  -2   -0.12    0.28
   8  -7   2    0.40    0.26
  -8   7  -2    0.05    0.25
  -8   7  -2   -0.06    0.26
   7  -7   2    0.22    0.23
   7  -7   2   -0.46    0.18
  -7   7  -2   -0.02    0.24
  -7   7  -2    0.27    0.18
  -7   7  -2    0.16    0.25
   6  -7   2    0.20    0.23
   6  -7   2   -0.18    0.15
  -6   7  -2    0.16    0.21
  -6   7  -2    0.30    0.16
  -6   7  -2   -0.12    0.21
   5  -7   2    1.67    0.16
   5  -7   2    2.00    0.25
   5  -7   2    1.85    0.13
  -5   7  -2    1.92    0.15
  -5   7  -2    1.63    0.22
  -5   7  -2    2.18    0.19
  -5   7  -2    2.07    0.24
   4  -7   2    2.09    0.17
   4  -7   2    2.97    0.24
  -4   7  -2    1.87    0.20
  -4   7  -2    2.20    0.13
  -4   7  -2    2.02    0.17
  -4   7  -2    2.39    0.22
   3  -7   2    2.85    0.15
   3  -7   2    3.33    0.26
  -3   7  -2    2.94    0.21
  -3   7  -2    2.68    0.21
  -3   7  -2    3.11    0.13
   2  -7   2    2.35    0.18
   2  -7   2    2.56    0.11
  -2   7  -2    2.78    0.21
  -2   7  -2    2.63    0.20
  -2   7  -2    2.16    0.13
   1  -7   2    4.06    0.24
   1  -7   2    4.20    0.12
  -1   7  -2    4.58    0.18
  -1   7  -2    4.12    0.23
  -1   7  -2    4.03    0.23
  -1   7  -2    4.27    0.12
   0  -7   2   83.71    1.67
   0  -7   2   84.72    1.63
   0   7  -2   86.49    1.66
   0   7  -2   87.02    1.66
   0   7  -2   87.59    1.65
  -1  -7   2   16.28    0.41
  -1  -7   2   16.21    0.41
   1   7  -2   16.08    0.40
   1   7  -2   16.43    0.40
   1   7  -2   16.13    0.34
   1   7  -2   16.91    0.39
  -2  -7   2   64.76    1.30
  -2  -7   2   64.36    1.31
   2   7  -2   64.43    1.27
   2   7  -2   65.12    1.30
   2   7  -2   64.64    1.31
  -3  -7   2    4.33    0.25
  -3  -7   2    4.56    0.26
   3   7  -2    4.59    0.19
   3   7  -2    4.37    0.26
   3   7  -2    4.71    0.29
  -4  -7   2   20.44    0.57
  -4  -7   2   20.51    0.55
  -4  -7   2   20.36    0.42
   4   7  -2   20.55    0.42
   4   7  -2   21.11    0.54
   4   7  -2   19.47    0.55
   4   7  -2   20.31    0.46
  -5  -7   2   11.04    0.44
  -5  -7   2   10.76    0.42
  -5  -7   2   11.11    0.29
   5   7  -2   11.70    0.40
   5   7  -2   11.57    0.43
   5   7  -2   11.08    0.31
   5   7  -2   11.57    0.29
  -6  -7   2   28.75    0.80
  -6  -7   2   28.68    0.78
   6   7  -2   29.40    0.74
   6   7  -2   30.09    0.65
   6   7  -2   28.68    0.80
  -7  -7   2   -0.03    0.25
   7   7  -2    0.20    0.22
   7   7  -2    0.41    0.28
  -8  -7   2    0.34    0.29
   8   7  -2    0.54    0.23
   8   7  -2    0.59    0.30
  -9  -7   2    0.02    0.32
   9   7  -2    0.64    0.29
   9   7  -2    0.21    0.33
   9  -6   2    0.59    0.33
  -9   6  -2    0.20    0.29
  -9   6  -2    0.31    0.33
   8  -6   2    2.65    0.33
   8  -6   2    3.45    0.37
  -8   6  -2    3.07    0.34
  -8   6  -2    2.67    0.35
   7  -6   2    0.20    0.19
   7  -6   2    1.06    0.29
  -7   6  -2    0.80    0.28
  -7   6  -2    0.75    0.25
  -7   6  -2    0.74    0.18
   6  -6   2   18.24    0.59
   6  -6   2   16.03    0.49
  -6   6  -2   17.49    0.56
  -6   6  -2   17.24    0.47
  -6   6  -2   16.73    0.57
   5  -6   2   16.29    0.38
   5  -6   2   15.55    0.44
   5  -6   2   16.58    0.53
  -5   6  -2   16.68    0.52
  -5   6  -2   17.03    0.45
  -5   6  -2   16.96    0.52
  -5   6  -2   16.13    0.38
   4  -6   2    1.91    0.15
   4  -6   2    1.67    0.19
  -4   6  -2    2.18    0.13
  -4   6  -2    1.75    0.19
  -4   6  -2    2.05    0.21
  -4   6  -2    2.19    0.17
   3  -6   2    4.73    0.19
   3  -6   2    5.21    0.28
  -3   6  -2    4.92    0.15
  -3   6  -2    5.57    0.28
  -3   6  -2    5.01    0.22
  -3   6  -2    5.13    0.28
   2  -6   2   32.57    0.65
   2  -6   2   33.03    0.72
  -2   6  -2   33.67    0.70
  -2   6  -2   32.23    0.72
  -2   6  -2   33.78    0.65
   1  -6   2    7.42    0.27
   1  -6   2    7.28    0.17
  -1   6  -2    7.22    0.17
  -1   6  -2    7.02    0.26
  -1   6  -2    7.37    0.21
  -1   6  -2    7.58    0.26
   0  -6   2   11.03    0.30
   0  -6   2   11.01    0.26
   0   6  -2   11.08    0.29
   0   6  -2   11.04    0.28
   0   6  -2   11.45    0.31
  -1  -6   2    2.01    0.15
  -1  -6   2    2.02    0.15
   1   6  -2    2.28    0.14
   1   6  -2    1.77    0.10
   1   6  -2    1.61    0.14
   1   6  -2    2.01    0.15
  -2  -6   2    1.47    0.17
  -2  -6   2    1.72    0.16
   2   6  -2    1.29    0.15
   2   6  -2    1.65    0.13
   2   6  -2    1.74    0.16
  -3  -6   2   25.75    0.62
  -3  -6   2   25.77    0.61
  -3  -6   2   25.49    0.50
   3   6  -2   25.53    0.60
   3   6  -2   25.62    0.55
   3   6  -2   25.19    0.50
  -4  -6   2    0.71    0.18
  -4  -6   2    0.67    0.18
  -4  -6   2    0.63    0.09
   4   6  -2    0.61    0.10
   4   6  -2    0.35    0.16
   4   6  -2    0.44    0.16
  -5  -6   2    2.35    0.25
  -5  -6   2    2.32    0.24
  -5  -6   2    2.17    0.14
   5   6  -2    2.68    0.25
   5   6  -2    2.30    0.17
   5   6  -2    2.66    0.22
  -6  -6   2    2.77    0.29
  -6  -6   2    2.60    0.27
  -6  -6   2    2.50    0.17
   6   6  -2    2.45    0.23
   6   6  -2    2.96    0.30
   6   6  -2    2.43    0.16
  -7  -6   2   26.74    0.80
   7   6  -2   26.17    0.81
   7   6  -2   29.52    0.75
  -8  -6   2    0.11    0.28
   8   6  -2    0.03    0.27
   8   6  -2    0.31    0.23
  -9  -6   2    0.11    0.32
   9   6  -2    0.43    0.33
 -10  -6   2    0.08    0.36
  10   6  -2    1.06    0.38
   9  -5   2    0.67    0.34
  -9   5  -2    0.06    0.32
  -9   5  -2    0.28    0.28
   8  -5   2    0.07    0.29
   8  -5   2   -0.26    0.21
  -8   5  -2   -0.19    0.28
  -8   5  -2   -0.04    0.25
   7  -5   2   -0.37    0.18
   7  -5   2   -0.34    0.25
  -7   5  -2   -0.08    0.16
  -7   5  -2    0.31    0.23
  -7   5  -2    0.04    0.24
   6  -5   2   10.95    0.31
   6  -5   2   11.32    0.48
   6  -5   2    9.58    0.38
  -6   5  -2   10.69    0.35
  -6   5  -2    9.63    0.45
  -6   5  -2   10.38    0.43
   5  -5   2    0.04    0.19
   5  -5   2    0.17    0.10
   5  -5   2   -0.08    0.13
  -5   5  -2    0.16    0.13
  -5   5  -2    0.02    0.18
  -5   5  -2   -0.15    0.17
  -5   5  -2    0.18    0.09
   4  -5   2    5.22    0.31
   4  -5   2    5.29    0.18
   4  -5   2    4.62    0.23
  -4   5  -2    5.39    0.24
  -4   5  -2    5.65    0.30
  -4   5  -2    5.39    0.18
  -4   5  -2    5.56    0.30
   3  -5   2   19.87    0.49
   3  -5   2   18.87    0.43
  -3   5  -2   19.12    0.45
  -3   5  -2   18.64    0.48
  -3   5  -2   18.56    0.48
  -3   5  -2   18.94    0.39
   2  -5   2    6.89    0.20
   2  -5   2    7.35    0.29
  -2   5  -2    6.95    0.18
  -2   5  -2    6.80    0.27
  -2   5  -2    6.41    0.24
  -2   5  -2    6.79    0.28
   1  -5   2   18.42    0.37
   1  -5   2   18.33    0.44
  -1   5  -2   18.97    0.37
  -1   5  -2   18.50    0.39
  -1   5  -2   18.85    0.44
  -1   5  -2   18.42    0.43
   0  -5   2    9.93    0.28
   0  -5   2    9.65    0.24
   0   5  -2    9.81    0.25
   0   5  -2    9.98    0.26
   0   5  -2   10.00    0.27
  -1  -5   2    0.88    0.13
  -1  -5   2    0.73    0.06
  -1  -5   2    0.90    0.13
   1   5  -2    0.80    0.06
   1   5  -2    0.64    0.12
   1   5  -2    1.14    0.12
  -2  -5   2   91.51    1.78
  -2  -5   2   91.64    1.79
   2   5  -2   91.01    1.78
   2   5  -2   92.54    1.75
   2   5  -2   90.89    1.79
  -3  -5   2   16.34    0.45
  -3  -5   2   16.64    0.36
  -3  -5   2   17.28    0.45
   3   5  -2   16.20    0.44
   3   5  -2   17.27    0.39
   3   5  -2   17.21    0.47
  -4  -5   2   23.21    0.49
  -4  -5   2   22.55    0.60
  -4  -5   2   22.65    0.58
   4   5  -2   23.56    0.60
   4   5  -2   22.52    0.50
   4   5  -2   22.51    0.56
  -5  -5   2   14.76    0.47
  -5  -5   2   15.12    0.38
  -5  -5   2   15.31    0.49
   5   5  -2   14.96    0.38
   5   5  -2   14.81    0.44
   5   5  -2   14.71    0.49
  -6  -5   2    0.37    0.21
  -6  -5   2    0.46    0.22
  -6  -5   2    0.53    0.14
   6   5  -2    0.49    0.22
   6   5  -2    0.19    0.12
   6   5  -2    0.56    0.18
  -7  -5   2   10.20    0.50
   7   5  -2   11.44    0.44
   7   5  -2    9.81    0.51
  -8  -5   2    0.12    0.27
   8   5  -2    0.13    0.28
   8   5  -2    0.44    0.22
  -9  -5   2    0.29    0.31
   9   5  -2   -0.07    0.32
 -10  -5   2    0.31    0.36
  10   5  -2    0.86    0.37
  10  -4   2    1.38    0.39
 -10   4  -2    0.60    0.36
   9  -4   2    0.47    0.32
  -9   4  -2    0.44    0.33
  -9   4  -2    0.06    0.28
   8  -4   2    0.40    0.29
   8  -4   2    0.56    0.23
  -8   4  -2    0.38    0.25
  -8   4  -2    0.54    0.29
   7  -4   2    0.38    0.21
   7  -4   2    0.85    0.25
  -7   4  -2    0.45    0.23
  -7   4  -2    0.60    0.23
   6  -4   2    3.74    0.29
   6  -4   2    4.74    0.22
   6  -4   2    3.87    0.28
  -6   4  -2    4.29    0.25
  -6   4  -2    4.68    0.33
  -6   4  -2    4.41    0.33
   5  -4   2    3.98    0.25
   5  -4   2    4.62    0.20
   5  -4   2    4.50    0.33
  -5   4  -2    4.09    0.32
  -5   4  -2    4.14    0.23
  -5   4  -2    4.46    0.30
   4  -4   2    3.57    0.16
   4  -4   2    3.15    0.22
   4  -4   2    3.83    0.27
  -4   4  -2    3.83    0.16
  -4   4  -2    3.58    0.26
  -4   4  -2    3.26    0.25
  -4   4  -2    3.50    0.20
   3  -4   2   -0.03    0.07
   3  -4   2   -0.12    0.10
   3  -4   2    0.10    0.16
  -3   4  -2   -0.02    0.15
  -3   4  -2    0.08    0.11
  -3   4  -2    0.22    0.15
  -3   4  -2    0.00    0.07
   2  -4   2    7.59    0.22
   2  -4   2    7.59    0.26
  -2   4  -2    7.86    0.29
  -2   4  -2    7.67    0.26
  -2   4  -2    7.73    0.18
  -2   4  -2    7.49    0.24
   1  -4   2   92.78    1.81
   1  -4   2   95.23    1.78
  -1   4  -2   93.20    1.81
  -1   4  -2   98.90    1.78
  -1   4  -2   94.08    1.78
  -1   4  -2   93.69    1.80
   0  -4   2   10.87    0.25
   0  -4   2   10.94    0.27
   0   4  -2   10.86    0.25
   0   4  -2   10.92    0.25
   0   4  -2   10.74    0.26
  -1  -4   2   15.92    0.37
  -1  -4   2   15.94    0.38
  -1  -4   2   16.40    0.32
   1   4  -2   16.19    0.36
   1   4  -2   16.12    0.38
   1   4  -2   15.85    0.32
  -2  -4   2   94.11    1.77
  -2  -4   2   94.51    1.84
  -2  -4   2   94.30    1.82
   2   4  -2   96.70    1.80
   2   4  -2   91.86    1.78
   2   4  -2   94.15    1.83
   2   4  -2   95.57    1.77
   2   4  -2   93.52    1.82
  -3  -4   2    1.33    0.17
  -3  -4   2    1.49    0.10
  -3  -4   2    1.52    0.18
   3   4  -2    1.64    0.19
   3   4  -2    1.37    0.11
   3   4  -2    1.33    0.14
  -4  -4   2   14.09    0.34
  -4  -4   2   13.01    0.43
  -4  -4   2   13.83    0.42
   4   4  -2   14.43    0.40
   4   4  -2   13.36    0.34
   4   4  -2   13.57    0.44
  -5  -4   2    6.55    0.35
  -5  -4   2    6.75    0.25
  -5  -4   2    6.47    0.32
   5   4  -2    7.09    0.30
   5   4  -2    6.49    0.23
   5   4  -2    6.38    0.35
  -6  -4   2    1.08    0.16
  -6  -4   2    1.04    0.22
  -6  -4   2    0.77    0.22
   6   4  -2    0.91    0.13
   6   4  -2    0.75    0.22
   6   4  -2    1.13    0.18
  -7  -4   2    0.91    0.26
  -7  -4   2    1.00    0.20
   7   4  -2    1.28    0.22
   7   4  -2    0.82    0.27
  -8  -4   2   -0.22    0.27
   8   4  -2    0.24    0.21
   8   4  -2   -0.23    0.27
  -9  -4   2    0.92    0.33
   9   4  -2    0.05    0.31
 -10  -4   2   -0.30    0.34
  10   4  -2    0.79    0.36
  10  -3   2    0.46    0.36
 -10   3  -2    0.80    0.38
   9  -3   2    0.06    0.30
   9  -3   2    0.57    0.26
  -9   3  -2   -0.01    0.28
  -9   3  -2    0.14    0.26
   8  -3   2    1.26    0.29
   8  -3   2    2.47    0.28
  -8   3  -2    1.44    0.29
  -8   3  -2    1.25    0.27
   7  -3   2    0.58    0.21
   7  -3   2    0.37    0.26
  -7   3  -2    1.03    0.27
  -7   3  -2    0.46    0.23
   6  -3   2    2.95    0.27
   6  -3   2    3.39    0.27
   6  -3   2    3.79    0.22
  -6   3  -2    3.46    0.22
  -6   3  -2    3.66    0.27
  -6   3  -2    2.89    0.28
   5  -3   2    3.89    0.28
   5  -3   2    2.97    0.24
   5  -3   2    3.94    0.19
  -5   3  -2    4.02    0.31
  -5   3  -2    3.62    0.21
  -5   3  -2    3.40    0.27
   4  -3   2    9.96    0.33
   4  -3   2   10.48    0.39
   4  -3   2   10.44    0.27
  -4   3  -2   10.39    0.29
  -4   3  -2   10.56    0.38
  -4   3  -2    9.80    0.27
  -4   3  -2   10.54    0.36
   3  -3   2   14.63    0.37
   3  -3   2   15.20    0.43
   3  -3   2   14.85    0.32
  -3   3  -2   14.48    0.40
  -3   3  -2   14.49    0.32
  -3   3  -2   14.35    0.35
  -3   3  -2   14.50    0.41
   2  -3   2    4.77    0.24
   2  -3   2    4.65    0.19
  -2   3  -2    4.89    0.18
  -2   3  -2    4.86    0.24
  -2   3  -2    4.68    0.13
  -2   3  -2    4.62    0.23
   1  -3   2   33.04    0.62
   1  -3   2   31.77    0.66
   1  -3   2   33.33    0.63
  -1   3  -2   32.84    0.65
  -1   3  -2   32.73    0.62
  -1   3  -2   32.28    0.67
  -1   3  -2   32.49    0.66
   0  -3   2   20.67    0.42
   0  -3   2   20.63    0.43
   0   3  -2   20.85    0.43
   0   3  -2   21.31    0.42
   0   3  -2   20.89    0.42
  -1  -3   2    6.76    0.22
  -1  -3   2    6.97    0.21
  -1  -3   2    6.71    0.15
   1   3  -2    7.10    0.15
   1   3  -2    7.11    0.22
   1   3  -2    7.23    0.19
  -2  -3   2    6.42    0.24
  -2  -3   2    5.77    0.26
  -2  -3   2    6.29    0.17
   2   3  -2    6.21    0.19
   2   3  -2    5.78    0.26
   2   3  -2    6.54    0.24
  -3  -3   2    3.03    0.20
  -3  -3   2    3.32    0.22
  -3  -3   2    2.58    0.16
   3   3  -2    2.83    0.16
   3   3  -2    2.98    0.20
   3   3  -2    2.62    0.21
  -4  -3   2    8.18    0.31
  -4  -3   2    8.00    0.24
  -4  -3   2    8.46    0.26
  -4  -3   2    7.65    0.33
   4   3  -2    8.00    0.32
   4   3  -2    7.96    0.25
   4   3  -2    8.26    0.29
  -5  -3   2    8.31    0.35
  -5  -3   2    8.56    0.27
  -5  -3   2    8.57    0.37
  -5  -3   2    8.52    0.29
   5   3  -2    8.45    0.37
   5   3  -2    8.22    0.32
   5   3  -2    8.03    0.26
  -6  -3   2    0.38    0.19
  -6  -3   2    0.41    0.21
  -6  -3   2    0.14    0.14
   6   3  -2    0.38    0.21
   6   3  -2    0.40    0.16
   6   3  -2    0.18    0.12
  -7  -3   2    2.18    0.29
  -7  -3   2    2.34    0.22
   7   3  -2    2.19    0.23
   7   3  -2    2.02    0.30
  -8  -3   2    0.36    0.29
   8   3  -2    0.65    0.27
   8   3  -2    0.33    0.21
  -9  -3   2    0.11    0.30
   9   3  -2    0.37    0.31
 -10  -3   2   -0.67    0.32
  10   3  -2    0.34    0.33
  10  -2   2    0.33    0.37
 -10   2  -2    0.51    0.38
   9  -2   2    5.74    0.46
   9  -2   2    3.55    0.42
  -9   2  -2    2.92    0.37
  -9   2  -2    3.08    0.40
   8  -2   2    0.79    0.30
   8  -2   2    1.22    0.25
  -8   2  -2    0.98    0.25
  -8   2  -2    1.19    0.32
   7  -2   2    0.27    0.20
   7  -2   2    0.01    0.25
  -7   2  -2    0.07    0.24
  -7   2  -2   -0.18    0.20
   6  -2   2    2.90    0.19
   6  -2   2    3.29    0.25
   6  -2   2    2.99    0.29
  -6   2  -2    3.42    0.21
  -6   2  -2    3.06    0.29
  -6   2  -2    2.99    0.26
   5  -2   2    1.49    0.18
   5  -2   2    1.38    0.13
  -5   2  -2    1.36    0.14
  -5   2  -2    1.69    0.19
  -5   2  -2    1.15    0.19
   4  -2   2    0.88    0.11
   4  -2   2    1.25    0.15
  -4   2  -2    0.91    0.16
  -4   2  -2    0.96    0.19
  -4   2  -2    0.84    0.11
   3  -2   2    4.49    0.17
   3  -2   2    4.92    0.23
  -3   2  -2    4.87    0.24
  -3   2  -2    4.93    0.25
  -3   2  -2    4.78    0.17
  -3   2  -2    4.77    0.18
   2  -2   2   29.72    0.57
   2  -2   2   30.37    0.61
   2  -2   2   29.60    0.64
  -2   2  -2   28.94    0.57
  -2   2  -2   29.75    0.63
  -2   2  -2   29.05    0.63
  -2   2  -2   29.16    0.60
   1  -2   2   26.34    0.52
   1  -2   2   25.55    0.53
  -1   2  -2   26.56    0.54
  -1   2  -2   26.57    0.52
  -1   2  -2   25.96    0.53
   0  -2   2   44.00    0.89
   0  -2   2   46.76    0.88
   0  -2   2   46.95    0.88
   0   2  -2   46.84    0.88
   0   2  -2   45.93    0.89
   0   2  -2   46.52    0.88
   0   2  -2   47.51    0.88
  -1  -2   2  162.21    3.10
  -1  -2   2  163.36    3.16
  -1  -2   2  164.70    3.11
  -1  -2   2  162.62    3.17
   1   2  -2  167.57    3.11
   1   2  -2  166.91    3.10
   1   2  -2  168.86    3.18
   1   2  -2  165.42    3.13
  -2  -2   2   42.93    0.87
  -2  -2   2   43.15    0.87
  -2  -2   2   43.23    0.85
  -2  -2   2   42.76    0.84
  -2  -2   2   42.79    0.88
   2   2  -2   43.57    0.87
   2   2  -2   43.15    0.85
   2   2  -2   44.22    0.89
  -3  -2   2   11.25    0.32
  -3  -2   2   11.26    0.36
  -3  -2   2   11.44    0.30
  -3  -2   2   10.53    0.32
  -3  -2   2   10.84    0.28
   3   2  -2   11.24    0.32
   3   2  -2   10.92    0.35
   3   2  -2   11.29    0.29
  -4  -2   2   10.94    0.32
  -4  -2   2   11.27    0.38
  -4  -2   2   11.31    0.30
  -4  -2   2   11.09    0.37
   4   2  -2   11.42    0.33
   4   2  -2   10.77    0.30
   4   2  -2   10.96    0.38
  -5  -2   2    0.01    0.11
  -5  -2   2    0.26    0.18
  -5  -2   2   -0.17    0.16
  -5  -2   2    0.01    0.13
   5   2  -2    0.08    0.17
   5   2  -2    0.16    0.11
   5   2  -2    0.20    0.13
  -6  -2   2   13.91    0.38
  -6  -2   2   13.81    0.50
  -6  -2   2   13.63    0.49
  -6  -2   2   13.89    0.42
   6   2  -2   14.01    0.42
   6   2  -2   13.70    0.38
   6   2  -2   13.55    0.49
  -7  -2   2    3.90    0.27
  -7  -2   2    3.90    0.34
   7   2  -2    3.76    0.26
   7   2  -2    3.69    0.33
  -8  -2   2    0.60    0.28
   8   2  -2    0.93    0.22
   8   2  -2    0.54    0.27
  -9  -2   2    0.26    0.30
   9   2  -2    0.25    0.28
 -10  -2   2    1.03    0.38
  10   2  -2    1.81    0.36
  10   2  -2    0.87    0.37
  10  -1   2    1.11    0.32
  10  -1   2   -0.42    0.34
 -10   1  -2    0.65    0.36
   9  -1   2    1.38    0.30
   9  -1   2    0.08    0.32
  -9   1  -2    0.64    0.34
   8  -1   2    1.03    0.25
   8  -1   2    0.38    0.29
  -8   1  -2    0.55    0.24
  -8   1  -2    1.36    0.32
   7  -1   2    1.22    0.24
   7  -1   2    1.35    0.26
  -7   1  -2    1.33    0.23
  -7   1  -2    1.16    0.24
   6  -1   2    0.66    0.19
   6  -1   2    0.36    0.14
  -6   1  -2    0.57    0.19
  -6   1  -2    0.72    0.13
  -6   1  -2    0.68    0.23
   5  -1   2    6.55    0.31
   5  -1   2    6.29    0.24
  -5   1  -2    6.30    0.30
  -5   1  -2    6.52    0.35
  -5   1  -2    6.14    0.23
   4  -1   2   30.11    0.63
   4  -1   2   29.72    0.69
  -4   1  -2   30.02    0.62
  -4   1  -2   29.36    0.71
  -4   1  -2   29.67    0.68
   3  -1   2    9.40    0.24
   3  -1   2    9.53    0.31
  -3   1  -2    9.25    0.30
  -3   1  -2    8.88    0.32
  -3   1  -2    8.91    0.24
   2  -1   2   29.89    0.61
   2  -1   2   29.41    0.58
  -2   1  -2   28.55    0.58
  -2   1  -2   28.42    0.63
  -2   1  -2   29.91    0.62
   1  -1   2    8.05    0.20
   1  -1   2    7.57    0.16
  -1   1  -2    7.58    0.20
  -1   1  -2    7.93    0.16
  -1   1  -2    7.91    0.18
  -1   1  -2    7.85    0.21
   0  -1   2  129.61    2.34
   0  -1   2  128.87    2.34
   0   1  -2  114.43    2.33
   0   1  -2  133.81    2.32
   0   1  -2  102.00    2.31
   0   1  -2  125.42    2.34
  -1  -1   2   97.94    1.85
  -1  -1   2   99.06    1.85
  -1  -1   2   98.62    1.84
  -1  -1   2   96.31    1.84
  -1  -1   2   96.34    1.85
   1   1  -2   99.27    1.85
   1   1  -2   97.28    1.84
   1   1  -2   98.85    1.84
  -2  -1   2    2.45    0.16
  -2  -1   2    2.54    0.15
  -2  -1   2    2.09    0.15
  -2  -1   2    2.40    0.18
   2   1  -2    2.25    0.17
   2   1  -2    2.41    0.16
   2   1  -2    2.26    0.14
  -3  -1   2    1.13    0.13
  -3  -1   2    1.13    0.15
  -3  -1   2    1.04    0.11
  -3  -1   2    1.04    0.13
  -3  -1   2    1.38    0.17
   3   1  -2    0.92    0.12
   3   1  -2    1.05    0.11
   3   1  -2    1.08    0.16
  -4  -1   2    1.80    0.16
  -4  -1   2    1.51    0.15
  -4  -1   2    1.43    0.18
  -4  -1   2    1.51    0.19
  -4  -1   2    1.44    0.13
   4   1  -2    1.44    0.13
   4   1  -2    1.37    0.18
   4   1  -2    1.46    0.14
  -5  -1   2   -0.07    0.15
  -5  -1   2   -0.06    0.13
  -5  -1   2   -0.13    0.11
  -5  -1   2   -0.06    0.17
   5   1  -2   -0.04    0.15
   5   1  -2   -0.12    0.12
   5   1  -2   -0.03    0.10
  -6  -1   2   -0.08    0.20
  -6  -1   2    0.20    0.13
  -6  -1   2    0.04    0.18
  -6  -1   2    0.38    0.16
   6   1  -2    0.20    0.19
   6   1  -2    0.21    0.14
   6   1  -2    0.31    0.13
  -7  -1   2    1.37    0.21
  -7  -1   2    0.89    0.26
   7   1  -2    1.09    0.20
   7   1  -2    1.40    0.20
   7   1  -2    1.22    0.25
  -8  -1   2    1.62    0.24
  -8  -1   2    1.58    0.30
   8   1  -2    1.34    0.23
   8   1  -2    1.89    0.28
  -9  -1   2   -0.07    0.29
   9   1  -2    0.12    0.28
   9   1  -2    0.72    0.29
 -10  -1   2   -0.22    0.33
  10   1  -2    0.55    0.32
  10   1  -2   -0.29    0.32
  10   0   2    2.77    0.36
  10   0   2    1.20    0.37
 -10   0  -2    1.64    0.39
   9   0   2    0.05    0.32
   9   0   2    0.42    0.27
  -9   0  -2    0.00    0.32
   8   0   2    0.89    0.26
   8   0   2    0.10    0.27
  -8   0  -2   -0.11    0.21
  -8   0  -2   -0.07    0.24
   7   0   2   -0.47    0.14
   7   0   2    0.14    0.20
  -7   0  -2    0.00    0.20
  -7   0  -2   -0.16    0.23
   6   0   2   27.38    0.60
   6   0   2   26.57    0.63
   6   0   2   25.91    0.70
  -6   0  -2   28.00    0.60
  -6   0  -2   27.59    0.68
  -6   0  -2   25.68    0.73
   5   0   2   -0.21    0.10
   5   0   2    0.18    0.16
  -5   0  -2   -0.06    0.09
  -5   0  -2    0.02    0.18
  -5   0  -2   -0.03    0.14
   4   0   2   15.86    0.45
   4   0   2   16.06    0.39
  -4   0  -2   15.75    0.47
  -4   0  -2   16.37    0.37
  -4   0  -2   15.86    0.42
   3   0   2    0.03    0.13
   3   0   2    0.02    0.09
  -3   0  -2    0.11    0.12
  -3   0  -2   -0.04    0.15
  -3   0  -2    0.17    0.08
   2   0   2   73.28    1.38
   2   0   2   73.60    1.41
  -2   0  -2   72.41    1.42
  -2   0  -2   71.37    1.37
  -2   0  -2   72.12    1.40
   1   0   2    0.24    0.08
   1   0   2    0.09    0.03
   1   0   2    0.01    0.05
  -1   0  -2    0.00    0.07
  -1   0  -2    0.05    0.08
  -1   0  -2    0.04    0.04
  -1   0  -2    0.10    0.05
   0   0  -2    0.03    0.03
   0   0  -2    0.02    0.02
  -1   0   2    0.25    0.06
  -1   0   2    0.35    0.06
  -1   0   2    0.29    0.07
  -1   0   2    0.43    0.07
  -1   0   2    0.38    0.06
  -2   0   2  275.46    5.42
  -2   0   2  274.30    5.40
  -2   0   2  284.99    5.37
  -2   0   2  282.29    5.39
  -2   0   2  288.26    5.38
   2   0  -2  282.89    5.40
   2   0  -2  290.41    5.41
  -3   0   2    0.06    0.10
  -3   0   2    0.00    0.12
  -3   0   2   -0.09    0.13
  -3   0   2   -0.10    0.10
  -3   0   2   -0.13    0.14
   3   0  -2    0.06    0.11
   3   0  -2    0.18    0.13
  -4   0   2    0.57    0.13
  -4   0   2    0.79    0.14
  -4   0   2    0.70    0.16
  -4   0   2    0.77    0.12
  -4   0   2    0.59    0.15
   4   0  -2    0.79    0.16
   4   0  -2    0.73    0.12
  -5   0   2   -0.04    0.17
  -5   0   2    0.17    0.14
  -5   0   2   -0.10    0.12
  -5   0   2   -0.12    0.11
  -5   0   2    0.00    0.16
   5   0  -2   -0.16    0.12
   5   0  -2    0.06    0.15
   5   0  -2   -0.10    0.11
  -6   0   2    5.73    0.30
  -6   0   2    5.69    0.36
  -6   0   2    5.80    0.34
  -6   0   2    5.66    0.26
   6   0  -2    5.66    0.29
   6   0  -2    6.01    0.33
   6   0  -2    6.03    0.26
  -7   0   2   -0.25    0.14
  -7   0   2   -0.15    0.22
  -7   0   2    0.13    0.19
   7   0  -2   -0.18    0.20
   7   0  -2   -0.60    0.15
   7   0  -2    0.08    0.15
  -8   0   2   -0.14    0.21
  -8   0   2   -0.15    0.26
   8   0  -2    0.22    0.23
  -9   0   2   -0.20    0.30
   9   0  -2    0.54    0.27
   9   0  -2   -0.17    0.29
 -10   0   2   -0.25    0.32
  10   0  -2    0.16    0.29
  10   0  -2   -0.68    0.29
  10   1   2   -0.45    0.34
  10   1   2    1.15    0.35
 -10  -1  -2    0.10    0.35
   9   1   2    0.05    0.32
   9   1   2    1.24    0.31
  -9  -1  -2    0.29    0.32
   8   1   2    1.50    0.28
  -8  -1  -2    0.61    0.22
  -8  -1  -2    0.42    0.29
   7   1   2    1.18    0.25
   7   1   2    1.23    0.19
  -7  -1  -2    1.36    0.22
  -7  -1  -2    1.54    0.29
   6   1   2    0.53    0.11
   6   1   2    0.45    0.20
   6   1   2    0.53    0.15
  -6  -1  -2    0.44    0.11
  -6  -1  -2    0.04    0.22
  -6  -1  -2    0.65    0.17
   5   1   2    6.59    0.21
   5   1   2    5.97    0.25
   5   1   2    6.49    0.33
  -5  -1  -2    5.68    0.34
  -5  -1  -2    6.29    0.21
  -5  -1  -2    6.45    0.29
   4   1   2   29.90    0.65
   4   1   2   29.84    0.70
   4   1   2   30.28    0.62
  -4  -1  -2   30.77    0.72
  -4  -1  -2   29.93    0.67
  -4  -1  -2   30.60    0.62
   3   1   2    9.62    0.26
   3   1   2    9.35    0.32
  -3  -1  -2    8.94    0.31
  -3  -1  -2    9.55    0.29
  -3  -1  -2    9.57    0.23
   2   1   2   28.91    0.59
   2   1   2   28.82    0.62
   2   1   2   27.95    0.55
  -2  -1  -2   29.31    0.56
  -2  -1  -2   28.79    0.59
  -2  -1  -2   29.18    0.62
   1   1   2    7.95    0.19
   1   1   2    7.97    0.21
  -1  -1  -2    7.64    0.21
  -1  -1  -2    7.47    0.18
   0   1   2  131.89    2.50
   0   1   2  119.77    2.44
   0   1   2  135.58    2.45
   0   1   2  131.39    2.44
   0  -1  -2  118.90    2.46
   0  -1  -2  133.50    2.43
  -1   1   2   99.85    1.86
  -1   1   2   97.49    1.86
  -1   1   2   99.41    1.87
  -1   1   2   98.21    1.86
  -1   1   2   96.80    1.87
   1  -1  -2  100.38    1.87
  -2   1   2    2.16    0.18
  -2   1   2    1.97    0.14
  -2   1   2    2.50    0.15
  -2   1   2    2.41    0.18
  -2   1   2    2.25    0.16
  -3   1   2    1.18    0.12
  -3   1   2    1.03    0.14
  -3   1   2    1.06    0.14
  -3   1   2    1.18    0.12
  -3   1   2    1.27    0.16
   3  -1  -2    0.89    0.14
   3  -1  -2    1.14    0.12
  -4   1   2    1.49    0.17
  -4   1   2    1.43    0.14
  -4   1   2    1.59    0.19
  -4   1   2    1.26    0.16
  -4   1   2    1.37    0.14
   4  -1  -2    1.53    0.16
   4  -1  -2    1.33    0.14
  -5   1   2    0.05    0.14
  -5   1   2   -0.05    0.15
  -5   1   2   -0.01    0.12
  -5   1   2    0.03    0.15
  -5   1   2   -0.17    0.12
   5  -1  -2    0.01    0.14
   5  -1  -2   -0.15    0.11
  -6   1   2    0.15    0.14
  -6   1   2    0.34    0.15
  -6   1   2    0.07    0.19
  -6   1   2    0.47    0.18
   6  -1  -2   -0.05    0.14
   6  -1  -2    0.23    0.13
   6  -1  -2    0.45    0.18
  -7   1   2    1.25    0.27
  -7   1   2    1.30    0.22
  -7   1   2    1.44    0.19
   7  -1  -2    1.32    0.23
   7  -1  -2    1.17    0.19
   7  -1  -2    1.49    0.18
  -8   1   2    1.14    0.24
  -8   1   2    1.36    0.31
   8  -1  -2    2.47    0.28
   8  -1  -2    1.23    0.31
  -9   1   2    0.31    0.31
   9  -1  -2   -0.10    0.29
   9  -1  -2    0.82    0.28
 -10   1   2   -0.52    0.32
  10  -1  -2   -0.01    0.33
  10  -1  -2    0.58    0.28
  10   2   2    0.68    0.33
  10   2   2    1.66    0.35
 -10  -2  -2    0.70    0.36
   9   2   2    4.29    0.41
  -9  -2  -2    4.07    0.43
   8   2   2    1.17    0.29
  -8  -2  -2    0.83    0.27
   7   2   2   -0.22    0.16
   7   2   2   -0.34    0.22
  -7  -2  -2   -0.20    0.25
  -7  -2  -2    0.08    0.18
   6   2   2    3.35    0.24
   6   2   2    2.81    0.17
   6   2   2    3.14    0.28
  -6  -2  -2    2.43    0.17
  -6  -2  -2    3.39    0.23
  -6  -2  -2    3.26    0.29
   5   2   2    1.25    0.15
   5   2   2    1.48    0.21
   5   2   2    1.30    0.11
  -5  -2  -2    1.28    0.17
  -5  -2  -2    1.45    0.11
  -5  -2  -2    1.41    0.22
   4   2   2    1.06    0.18
   4   2   2    1.13    0.09
   4   2   2    0.87    0.13
  -4  -2  -2    0.97    0.09
  -4  -2  -2    0.92    0.14
  -4  -2  -2    0.82    0.17
   3   2   2    5.01    0.15
   3   2   2    4.94    0.20
   3   2   2    5.01    0.25
  -3  -2  -2    4.98    0.20
  -3  -2  -2    4.70    0.24
  -3  -2  -2    4.83    0.15
   2   2   2   29.97    0.65
   2   2   2   30.66    0.62
   2   2   2   30.31    0.57
   2   2   2   29.39    0.57
  -2  -2  -2   29.79    0.65
  -2  -2  -2   30.39    0.61
   1   2   2   26.18    0.54
   1   2   2   26.21    0.49
   1   2   2   26.76    0.53
  -1  -2  -2   26.44    0.49
  -1  -2  -2   25.74    0.51
  -1  -2  -2   25.94    0.53
   0   2   2   47.14    0.90
   0   2   2   47.70    0.91
   0   2   2   47.15    0.90
   0   2   2   46.85    0.90
   0  -2  -2   47.95    0.90
   0  -2  -2   47.35    0.90
  -1   2   2  169.34    3.16
  -1   2   2  161.96    3.17
  -1   2   2  166.78    3.15
  -1   2   2  169.24    3.21
  -1   2   2  168.99    3.22
   1  -2  -2  165.19    3.14
  -2   2   2   42.84    0.87
  -2   2   2   42.77    0.86
  -2   2   2   43.72    0.88
  -2   2   2   42.78    0.85
  -2   2   2   42.63    0.86
   2  -2  -2   44.05    0.87
  -3   2   2   11.05    0.30
  -3   2   2   11.51    0.34
  -3   2   2   11.04    0.30
  -3   2   2   10.86    0.32
  -3   2   2   10.92    0.34
   3  -2  -2   10.80    0.32
  -4   2   2   11.59    0.38
  -4   2   2   10.48    0.35
  -4   2   2   11.83    0.33
  -4   2   2   10.88    0.32
  -4   2   2   10.96    0.36
   4  -2  -2   11.24    0.35
   4  -2  -2   10.90    0.32
  -5   2   2   -0.05    0.12
  -5   2   2   -0.03    0.12
  -5   2   2    0.06    0.17
  -5   2   2    0.14    0.15
  -5   2   2    0.33    0.16
   5  -2  -2    0.13    0.13
   5  -2  -2    0.34    0.12
  -6   2   2   14.55    0.41
  -6   2   2   13.82    0.50
  -6   2   2   13.61    0.47
  -6   2   2   13.96    0.42
   6  -2  -2   14.36    0.50
   6  -2  -2   14.56    0.47
   6  -2  -2   13.84    0.41
  -7   2   2    3.95    0.30
  -7   2   2    3.85    0.33
  -7   2   2    3.42    0.26
   7  -2  -2    4.37    0.35
   7  -2  -2    3.50    0.28
   7  -2  -2    4.18    0.35
   7  -2  -2    3.98    0.26
  -8   2   2    0.92    0.25
  -8   2   2    1.13    0.29
   8  -2  -2    0.76    0.30
   8  -2  -2    1.32    0.25
  -9   2   2    0.04    0.30
  -9   2   2   -0.12    0.28
   9  -2  -2    0.24    0.27
   9  -2  -2    0.15    0.24
 -10   2   2    0.64    0.36
  10  -2  -2    1.16    0.36
  10   3   2    0.80    0.34
  10   3   2    0.91    0.38
 -10  -3  -2    0.35    0.36
   9   3   2    0.24    0.30
  -9  -3  -2   -0.30    0.31
   8   3   2    1.36    0.30
  -8  -3  -2    1.64    0.33
   7   3   2    0.68    0.19
   7   3   2    0.66    0.26
  -7  -3  -2    0.38    0.26
  -7  -3  -2    0.67    0.19
   6   3   2    3.61    0.30
   6   3   2    3.45    0.26
  -6  -3  -2    3.35    0.27
  -6  -3  -2    3.17    0.28
   5   3   2    3.78    0.22
   5   3   2    3.76    0.16
   5   3   2    3.80    0.27
  -5  -3  -2    3.64    0.22
  -5  -3  -2    4.30    0.32
   4   3   2    9.90    0.38
   4   3   2   10.29    0.25
   4   3   2   10.43    0.32
  -4  -3  -2   10.71    0.38
  -4  -3  -2   10.06    0.30
   3   3   2   15.12    0.43
   3   3   2   14.50    0.31
   3   3   2   14.98    0.38
  -3  -3  -2   14.94    0.36
  -3  -3  -2   14.96    0.42
   2   3   2    4.57    0.12
   2   3   2    4.89    0.20
   2   3   2    4.60    0.12
   2   3   2    4.76    0.25
  -2  -3  -2    4.92    0.13
  -2  -3  -2    4.91    0.22
  -2  -3  -2    4.61    0.17
   1   3   2   33.28    0.62
   1   3   2   32.96    0.66
   1   3   2   32.34    0.66
  -1  -3  -2   32.24    0.62
  -1  -3  -2   32.64    0.63
  -1  -3  -2   32.37    0.66
   0   3   2   20.85    0.43
   0   3   2   20.91    0.43
   0   3   2   21.20    0.44
   0   3   2   21.30    0.42
   0  -3  -2   20.98    0.43
   0  -3  -2   21.49    0.43
  -1   3   2    6.73    0.17
  -1   3   2    7.15    0.21
  -1   3   2    7.26    0.19
   1  -3  -2    7.31    0.20
   1  -3  -2    6.83    0.18
  -2   3   2    6.55    0.25
  -2   3   2    6.14    0.20
  -2   3   2    6.29    0.20
  -2   3   2    6.34    0.22
  -2   3   2    6.39    0.24
   2  -3  -2    6.09    0.24
  -3   3   2    2.70    0.17
  -3   3   2    3.05    0.22
  -3   3   2    2.55    0.19
  -3   3   2    2.87    0.18
  -3   3   2    2.74    0.19
   3  -3  -2    3.19    0.23
   3  -3  -2    2.57    0.19
  -4   3   2    8.32    0.30
  -4   3   2    8.46    0.27
  -4   3   2    7.62    0.33
  -4   3   2    8.21    0.32
  -4   3   2    8.00    0.26
   4  -3  -2    8.18    0.33
   4  -3  -2    8.14    0.26
   4  -3  -2    7.74    0.29
  -5   3   2    9.35    0.34
  -5   3   2    8.18    0.36
  -5   3   2    8.56    0.30
  -5   3   2    8.79    0.29
  -5   3   2    8.71    0.34
   5  -3  -2    8.23    0.32
   5  -3  -2    8.10    0.36
   5  -3  -2    7.99    0.28
  -6   3   2    0.24    0.20
  -6   3   2    0.34    0.14
  -6   3   2    0.02    0.14
  -6   3   2    0.36    0.19
   6  -3  -2    0.30    0.14
   6  -3  -2    0.27    0.17
   6  -3  -2    0.44    0.21
  -7   3   2    1.92    0.29
  -7   3   2    2.17    0.21
  -7   3   2    2.20    0.26
   7  -3  -2    1.96    0.26
   7  -3  -2    2.06    0.25
   7  -3  -2    1.75    0.20
  -8   3   2    0.49    0.25
  -8   3   2    0.35    0.28
   8  -3  -2    0.55    0.28
   8  -3  -2    0.47    0.22
  -9   3   2    0.41    0.31
  -9   3   2    0.33    0.26
   9  -3  -2    0.42    0.31
   9  -3  -2    0.52    0.25
 -10   3   2    0.13    0.35
  10  -3  -2   -0.30    0.32
  10   4   2    1.08    0.38
 -10  -4  -2    0.85    0.36
   9   4   2    0.33    0.32
  -9  -4  -2   -0.17    0.31
   8   4   2    0.69    0.29
  -8  -4  -2    0.45    0.30
   7   4   2    0.66    0.19
   7   4   2    0.89    0.27
  -7  -4  -2    0.51    0.26
  -7  -4  -2    0.79    0.19
   6   4   2    3.90    0.30
   6   4   2    4.23    0.28
  -6  -4  -2    4.51    0.33
  -6  -4  -2    4.44    0.27
   5   4   2    5.21    0.25
   5   4   2    4.58    0.33
   5   4   2    4.30    0.16
  -5  -4  -2    4.00    0.23
  -5  -4  -2    4.40    0.29
   4   4   2    3.92    0.22
   4   4   2    3.43    0.25
   4   4   2    3.69    0.14
  -4  -4  -2    4.30    0.26
  -4  -4  -2    3.70    0.19
   3   4   2    0.15    0.12
   3   4   2   -0.09    0.14
   3   4   2   -0.20    0.06
  -3  -4  -2    0.12    0.09
  -3  -4  -2    0.24    0.15
   2   4   2    7.87    0.18
   2   4   2    8.46    0.26
   2   4   2    7.98    0.30
  -2  -4  -2    7.60    0.28
  -2  -4  -2    7.77    0.20
   1   4   2   94.71    1.82
   1   4   2   95.37    1.81
   1   4   2   95.09    1.78
  -1  -4  -2   94.17    1.79
  -1  -4  -2   95.11    1.82
   0   4   2   11.01    0.26
   0   4   2   11.00    0.26
   0   4   2   10.97    0.28
   0   4   2   11.18    0.26
   0  -4  -2   11.28    0.27
   0  -4  -2   11.08    0.26
  -1   4   2   15.92    0.32
  -1   4   2   16.28    0.36
  -1   4   2   15.72    0.36
  -1   4   2   15.90    0.37
   1  -4  -2   16.45    0.32
   1  -4  -2   16.33    0.37
  -2   4   2   94.84    1.82
  -2   4   2   96.71    1.80
  -2   4   2   92.89    1.83
  -2   4   2   92.90    1.82
  -2   4   2   94.50    1.79
   2  -4  -2   95.32    1.83
  -3   4   2    1.58    0.17
  -3   4   2    1.27    0.17
  -3   4   2    1.40    0.15
  -3   4   2    1.47    0.12
  -3   4   2    1.77    0.13
   3  -4  -2    1.48    0.13
   3  -4  -2    1.64    0.17
  -4   4   2   13.76    0.42
  -4   4   2   13.87    0.38
  -4   4   2   14.04    0.36
  -4   4   2   14.09    0.42
  -4   4   2   13.86    0.38
   4  -4  -2   14.77    0.43
   4  -4  -2   13.42    0.38
  -5   4   2    6.28    0.25
  -5   4   2    6.25    0.32
  -5   4   2    6.20    0.33
  -5   4   2    6.22    0.28
  -5   4   2    6.36    0.29
   5  -4  -2    6.30    0.34
   5  -4  -2    6.36    0.25
   5  -4  -2    6.20    0.28
  -6   4   2    0.71    0.21
  -6   4   2    1.03    0.17
  -6   4   2    0.90    0.22
  -6   4   2    1.01    0.16
   6  -4  -2    1.07    0.16
   6  -4  -2    0.85    0.18
   6  -4  -2    1.00    0.23
  -7   4   2    1.06    0.20
  -7   4   2    1.17    0.27
  -7   4   2    1.00    0.18
  -7   4   2    1.11    0.24
   7  -4  -2    1.15    0.18
   7  -4  -2    0.54    0.26
   7  -4  -2    0.49    0.21
  -8   4   2    0.25    0.25
  -8   4   2    0.32    0.27
   8  -4  -2   -0.17    0.20
   8  -4  -2    0.02    0.27
  -9   4   2   -0.09    0.27
  -9   4   2    0.39    0.31
   9  -4  -2    0.43    0.27
   9  -4  -2    0.02    0.29
 -10   4   2    0.30    0.35
  10  -4  -2    0.00    0.33
   9   5   2   -0.28    0.31
  -9  -5  -2   -0.02    0.31
   8   5   2    0.04    0.21
   8   5   2    0.22    0.29
  -8  -5  -2   -0.05    0.28
   7   5   2    0.09    0.25
   7   5   2    0.30    0.19
  -7  -5  -2    0.14    0.23
   6   5   2   10.99    0.40
   6   5   2   10.43    0.48
  -6  -5  -2   10.48    0.44
  -6  -5  -2   11.21    0.36
   5   5   2    0.36    0.20
   5   5   2   -0.04    0.07
   5   5   2    0.21    0.14
  -5  -5  -2    0.05    0.18
  -5  -5  -2    0.04    0.12
   4   5   2    5.12    0.16
   4   5   2    4.89    0.31
   4   5   2    5.43    0.25
  -4  -5  -2    4.93    0.30
  -4  -5  -2    5.00    0.20
   3   5   2   19.58    0.52
   3   5   2   19.23    0.48
   3   5   2   19.24    0.39
  -3  -5  -2   18.93    0.50
  -3  -5  -2   19.27    0.41
   2   5   2    7.18    0.29
   2   5   2    7.04    0.18
   2   5   2    6.69    0.25
  -2  -5  -2    6.77    0.27
  -2  -5  -2    7.03    0.18
   1   5   2   18.97    0.43
   1   5   2   18.76    0.44
   1   5   2   18.28    0.39
  -1  -5  -2   18.48    0.43
  -1  -5  -2   18.71    0.38
   0   5   2    9.80    0.26
   0   5   2   10.15    0.26
   0   5   2   10.20    0.25
   0   5   2   10.10    0.27
   0  -5  -2   10.30    0.28
  -1   5   2    0.79    0.06
  -1   5   2    1.12    0.13
  -1   5   2    0.55    0.10
  -1   5   2    0.98    0.14
   1  -5  -2    1.02    0.13
   1  -5  -2    0.87    0.06
  -2   5   2   89.05    1.75
  -2   5   2   89.11    1.71
  -2   5   2   89.02    1.76
  -2   5   2   93.05    1.73
   2  -5  -2   91.08    1.75
  -3   5   2   17.55    0.46
  -3   5   2   16.86    0.39
  -3   5   2   16.64    0.44
  -3   5   2   16.84    0.42
  -3   5   2   16.63    0.39
   3  -5  -2   16.45    0.43
   3  -5  -2   16.20    0.39
  -4   5   2   23.03    0.58
  -4   5   2   23.09    0.52
  -4   5   2   22.18    0.58
  -4   5   2   22.74    0.52
  -4   5   2   22.78    0.54
   4  -5  -2   23.03    0.57
   4  -5  -2   22.45    0.52
  -5   5   2   14.99    0.46
  -5   5   2   14.76    0.42
  -5   5   2   14.59    0.47
  -5   5   2   14.74    0.40
  -5   5   2   15.35    0.42
   5  -5  -2   15.17    0.48
   5  -5  -2   15.24    0.40
   5  -5  -2   14.54    0.42
  -6   5   2    0.38    0.16
  -6   5   2    0.52    0.20
  -6   5   2    0.25    0.14
  -6   5   2    0.21    0.20
   6  -5  -2    0.32    0.14
   6  -5  -2    0.23    0.16
   6  -5  -2    0.40    0.22
  -7   5   2    9.21    0.48
  -7   5   2   10.53    0.49
  -7   5   2   10.97    0.40
   7  -5  -2   10.44    0.49
   7  -5  -2   10.38    0.43
   7  -5  -2    9.87    0.42
  -8   5   2   -0.21    0.25
  -8   5   2    0.29    0.27
   8  -5  -2   -0.72    0.20
   8  -5  -2    0.22    0.27
  -9   5   2    0.17    0.28
  -9   5   2   -0.09    0.29
   9  -5  -2    0.52    0.31
 -10   5   2    0.86    0.37
  10  -5  -2    0.51    0.35
   9   6   2    0.40    0.32
  -9  -6  -2   -0.22    0.32
   8   6   2    3.54    0.30
   8   6   2    3.42    0.39
  -8  -6  -2    4.01    0.40
   7   6   2    1.14    0.22
   7   6   2    0.49    0.28
  -7  -6  -2    0.65    0.28
   6   6   2   16.63    0.57
   6   6   2   17.83    0.51
  -6  -6  -2   17.47    0.45
  -6  -6  -2   16.63    0.55
   5   6   2   15.94    0.53
   5   6   2   16.31    0.36
   5   6   2   16.35    0.47
  -5  -6  -2   16.24    0.40
  -5  -6  -2   16.11    0.50
   4   6   2    1.60    0.20
   4   6   2    2.17    0.12
   4   6   2    2.08    0.18
  -4  -6  -2    2.34    0.22
  -4  -6  -2    2.06    0.15
   3   6   2    5.09    0.25
   3   6   2    5.24    0.16
   3   6   2    5.21    0.30
  -3  -6  -2    5.13    0.17
  -3  -6  -2    5.08    0.28
   2   6   2   34.42    0.74
   2   6   2   33.93    0.66
   2   6   2   32.78    0.71
  -2  -6  -2   32.43    0.72
  -2  -6  -2   33.18    0.65
   1   6   2    7.73    0.26
   1   6   2    7.82    0.26
   1   6   2    7.38    0.22
  -1  -6  -2    7.27    0.19
  -1  -6  -2    7.37    0.27
   0   6   2   11.48    0.28
   0   6   2   11.12    0.29
   0   6   2   11.90    0.31
   0   6   2   11.68    0.32
   0  -6  -2   11.70    0.31
  -1   6   2    2.09    0.16
  -1   6   2    2.66    0.17
  -1   6   2    1.92    0.09
  -1   6   2    1.91    0.16
   1  -6  -2    2.17    0.16
   1  -6  -2    2.09    0.10
  -2   6   2    1.62    0.13
  -2   6   2    1.74    0.16
  -2   6   2    1.46    0.11
  -2   6   2    1.31    0.16
   2  -6  -2    1.79    0.16
  -3   6   2   25.05    0.55
  -3   6   2   26.29    0.62
  -3   6   2   25.50    0.54
  -3   6   2   26.01    0.59
  -3   6   2   25.84    0.60
   3  -6  -2   25.60    0.61
   3  -6  -2   25.69    0.54
  -4   6   2    0.55    0.14
  -4   6   2    0.73    0.17
  -4   6   2    0.66    0.12
  -4   6   2    0.70    0.11
  -4   6   2    0.88    0.19
   4  -6  -2    0.87    0.12
   4  -6  -2    0.45    0.16
  -5   6   2    2.60    0.19
  -5   6   2    2.23    0.23
  -5   6   2    2.93    0.25
  -5   6   2    2.39    0.19
   5  -6  -2    2.39    0.18
   5  -6  -2    2.45    0.24
  -6   6   2    2.83    0.22
  -6   6   2    2.88    0.20
  -6   6   2    2.53    0.25
  -6   6   2    2.84    0.28
   6  -6  -2    2.34    0.21
   6  -6  -2    2.43    0.27
   6  -6  -2    2.40    0.19
  -7   6   2   28.90    0.70
  -7   6   2   26.47    0.76
  -7   6   2   26.94    0.78
   7  -6  -2   27.50    0.78
   7  -6  -2   25.20    0.69
  -8   6   2   -0.22    0.25
  -8   6   2   -0.38    0.24
   8  -6  -2    0.02    0.27
   8  -6  -2   -0.64    0.20
  -9   6   2    0.15    0.29
  -9   6   2   -0.23    0.30
   9  -6  -2    0.02    0.31
 -10   6   2    0.28    0.35
 -10   6   2   -0.04    0.32
  10  -6  -2    1.08    0.36
   9   7   2   -0.08    0.33
  -9  -7  -2   -0.19    0.28
   8   7   2    0.60    0.23
   8   7   2    0.67    0.31
  -8  -7  -2    0.17    0.30
   7   7   2    0.17    0.20
   7   7   2    0.18    0.28
  -7  -7  -2    0.13    0.26
   6   7   2   -0.12    0.21
   6   7   2    0.08    0.18
  -6  -7  -2   -0.04    0.19
   5   7   2    1.98    0.20
   5   7   2    1.74    0.13
   5   7   2    1.68    0.22
  -5  -7  -2    2.10    0.14
  -5  -7  -2    2.32    0.25
   4   7   2    2.17    0.23
   4   7   2    2.36    0.20
   4   7   2    2.62    0.13
  -4  -7  -2    1.94    0.14
  -4  -7  -2    1.94    0.21
   3   7   2    3.30    0.14
   3   7   2    3.19    0.23
   3   7   2    3.39    0.24
  -3  -7  -2    3.34    0.13
  -3  -7  -2    3.29    0.23
   2   7   2    2.33    0.14
   2   7   2    2.81    0.19
   2   7   2    2.31    0.19
  -2  -7  -2    2.83    0.20
  -2  -7  -2    2.40    0.10
   1   7   2    4.95    0.24
   1   7   2    4.41    0.22
   1   7   2    4.32    0.19
   1   7   2    4.32    0.16
  -1  -7  -2    4.38    0.23
  -1  -7  -2    4.25    0.16
   0   7   2   85.89    1.67
   0   7   2   87.35    1.68
   0   7   2   86.46    1.68
   0   7   2   87.48    1.66
   0  -7  -2   87.46    1.69
  -1   7   2   16.40    0.39
  -1   7   2   16.40    0.40
  -1   7   2   16.75    0.42
  -1   7   2   16.21    0.33
   1  -7  -2   16.22    0.41
   1  -7  -2   16.29    0.33
  -2   7   2   66.17    1.31
  -2   7   2   66.54    1.33
  -2   7   2   65.44    1.28
  -2   7   2   64.21    1.24
   2  -7  -2   66.19    1.31
   2  -7  -2   64.71    1.24
  -3   7   2    4.51    0.20
  -3   7   2    4.26    0.22
  -3   7   2    4.34    0.26
  -3   7   2    4.47    0.17
   3  -7  -2    4.39    0.17
   3  -7  -2    4.49    0.26
  -4   7   2   21.69    0.49
  -4   7   2   21.33    0.48
  -4   7   2   20.66    0.53
  -4   7   2   20.41    0.54
  -4   7   2   20.48    0.55
   4  -7  -2   21.26    0.48
   4  -7  -2   21.46    0.56
  -5   7   2   11.10    0.37
  -5   7   2   11.35    0.42
  -5   7   2   11.49    0.43
  -5   7   2   11.02    0.33
   5  -7  -2   11.16    0.42
   5  -7  -2   10.93    0.34
  -6   7   2   29.56    0.68
  -6   7   2   30.65    0.73
  -6   7   2   28.81    0.78
  -6   7   2   28.66    0.78
   6  -7  -2   29.99    0.77
   6  -7  -2   29.95    0.68
   6  -7  -2   29.36    0.70
  -7   7   2   -0.16    0.22
  -7   7   2    0.04    0.18
  -7   7   2    0.15    0.24
   7  -7  -2   -0.13    0.18
   7  -7  -2    0.14    0.24
  -8   7   2    0.25    0.26
  -8   7   2   -0.13    0.24
   8  -7  -2   -0.10    0.26
  -9   7   2    0.47    0.30
  -9   7   2    0.25    0.30
   9  -7  -2    0.20    0.31
   9   8   2   -0.03    0.34
  -9  -8  -2    0.55    0.34
   8   8   2    0.10    0.22
   8   8   2   -0.09    0.29
  -8  -8  -2    0.00    0.29
   7   8   2    5.35    0.37
   7   8   2    6.02    0.49
  -7  -8  -2    5.31    0.39
   6   8   2    0.08    0.18
   6   8   2    0.06    0.21
  -6  -8  -2    0.06    0.23
   5   8   2   30.53    0.62
   5   8   2   30.20    0.79
   5   8   2   29.47    0.73
  -5  -8  -2   29.26    0.77
  -5  -8  -2   31.18    0.63
   4   8   2    0.22    0.08
   4   8   2    0.02    0.19
   4   8   2    0.12    0.14
  -4  -8  -2   -0.06    0.17
  -4  -8  -2    0.07    0.07
   3   8   2    4.37    0.26
   3   8   2    3.69    0.16
   3   8   2    3.96    0.26
  -3  -8  -2    4.07    0.13
  -3  -8  -2    3.39    0.26
   2   8   2    0.12    0.09
   2   8   2    0.24    0.13
   2   8   2    0.43    0.15
  -2  -8  -2    0.40    0.07
  -2  -8  -2    0.22    0.13
   1   8   2   11.29    0.33
   1   8   2   11.35    0.27
   1   8   2   11.61    0.30
   1   8   2   10.97    0.33
  -1  -8  -2   11.46    0.34
  -1  -8  -2   10.96    0.27
   0   8   2    0.02    0.13
   0   8   2    0.10    0.11
   0   8   2    0.22    0.10
   0   8   2    0.08    0.12
   0  -8  -2    0.27    0.14
  -1   8   2    7.34    0.26
  -1   8   2    7.47    0.18
  -1   8   2    7.51    0.26
  -1   8   2    7.30    0.25
   1  -8  -2    7.04    0.20
   1  -8  -2    7.27    0.26
  -2   8   2   15.74    0.42
  -2   8   2   15.10    0.38
  -2   8   2   14.86    0.43
   2  -8  -2   16.16    0.42
  -3   8   2   11.69    0.32
  -3   8   2   11.33    0.38
  -3   8   2   11.67    0.37
  -3   8   2   11.71    0.28
   3  -8  -2   12.04    0.28
   3  -8  -2   12.33    0.38
  -4   8   2   19.23    0.45
  -4   8   2   18.17    0.54
  -4   8   2   18.42    0.49
   4  -8  -2   18.82    0.43
   4  -8  -2   18.55    0.51
  -5   8   2    0.08    0.18
  -5   8   2    0.19    0.11
  -5   8   2    0.21    0.16
  -5   8   2   -0.05    0.18
   5  -8  -2   -0.08    0.17
   5  -8  -2    0.10    0.12
  -6   8   2   18.89    0.60
  -6   8   2   18.75    0.48
  -6   8   2   18.03    0.57
  -6   8   2   19.53    0.54
   6  -8  -2   18.81    0.49
   6  -8  -2   18.85    0.60
   6  -8  -2   19.16    0.51
  -7   8   2    0.89    0.27
  -7   8   2    0.80    0.27
  -7   8   2    0.93    0.21
   7  -8  -2    0.63    0.22
   7  -8  -2    0.88    0.26
  -8   8   2   -0.01    0.21
  -8   8   2   -0.14    0.26
  -8   8   2    0.12    0.27
   8  -8  -2   -0.03    0.27
  -9   8   2    0.12    0.31
  -9   8   2    0.62    0.32
   9  -8  -2    0.58    0.33
   9   9   2   -0.01    0.35
  -9  -9  -2   -0.45    0.32
   8   9   2    0.08    0.30
   8   9   2    0.11    0.23
  -8  -9  -2    0.08    0.30
   7   9   2    2.33    0.35
   7   9   2    2.40    0.28
  -7  -9  -2    2.01    0.33
   6   9   2    1.56    0.24
   6   9   2    1.83    0.29
  -6  -9  -2    2.04    0.28
   5   9   2    1.61    0.21
   5   9   2    1.33    0.11
   5   9   2    1.23    0.24
  -5  -9  -2    1.11    0.11
  -5  -9  -2    1.38    0.24
   4   9   2   10.54    0.38
   4   9   2    9.92    0.39
   4   9   2   10.61    0.27
  -4  -9  -2   10.63    0.41
  -4  -9  -2   10.88    0.24
   3   9   2    0.29    0.17
   3   9   2    0.14    0.14
   3   9   2   -0.02    0.09
  -3  -9  -2    0.05    0.05
  -3  -9  -2    0.12    0.17
   2   9   2   24.18    0.58
   2   9   2   22.97    0.56
   2   9   2   23.47    0.51
  -2  -9  -2   23.43    0.58
  -2  -9  -2   23.60    0.47
   1   9   2   58.30    1.17
   1   9   2   58.20    1.20
   1   9   2   59.13    1.19
   1   9   2   59.18    1.14
  -1  -9  -2   59.60    1.20
  -1  -9  -2   59.84    1.14
   0   9   2   11.71    0.35
   0   9   2   11.86    0.34
   0   9   2   11.60    0.32
   0   9   2   12.27    0.30
   0  -9  -2   11.88    0.35
  -1   9   2   31.84    0.62
  -1   9   2   31.94    0.69
  -1   9   2   31.83    0.70
  -1   9   2   31.93    0.70
   1  -9  -2   32.43    0.71
  -2   9   2   27.47    0.62
  -2   9   2   27.21    0.59
  -2   9   2   26.44    0.64
   2  -9  -2   26.39    0.63
  -3   9   2    1.42    0.13
  -3   9   2    1.07    0.16
  -3   9   2    1.21    0.18
   3  -9  -2    1.19    0.08
   3  -9  -2    0.82    0.16
  -4   9   2    0.07    0.10
  -4   9   2   -0.02    0.13
  -4   9   2    0.22    0.18
   4  -9  -2   -0.26    0.16
   4  -9  -2   -0.02    0.09
  -5   9   2    2.02    0.21
  -5   9   2    1.58    0.24
  -5   9   2    1.58    0.15
   5  -9  -2    2.23    0.25
   5  -9  -2    1.64    0.15
  -6   9   2   14.97    0.49
  -6   9   2   14.84    0.55
  -6   9   2   14.88    0.41
  -6   9   2   14.28    0.51
   6  -9  -2   15.13    0.54
   6  -9  -2   14.96    0.44
  -7   9   2    6.39    0.45
  -7   9   2    6.27    0.37
  -7   9   2    6.74    0.41
   7  -9  -2    7.41    0.46
  -8   9   2    0.68    0.30
  -8   9   2    0.30    0.28
  -8   9   2    0.46    0.22
   8  -9  -2    0.26    0.28
  -9   9   2    1.95    0.36
  -9   9   2    1.62    0.36
   9  -9  -2    0.51    0.32
   9  10   2    0.55    0.37
  -9 -10  -2   -0.50    0.32
   8  10   2    0.27    0.24
   8  10   2   -0.47    0.31
  -8 -10  -2   -0.17    0.28
   7  10   2    2.20    0.35
   7  10   2    1.86    0.27
  -7 -10  -2    1.21    0.31
   6  10   2    0.85    0.28
   6  10   2    0.98    0.23
  -6 -10  -2    1.09    0.25
   5  10   2    0.69    0.10
   5  10   2    0.69    0.20
   5  10   2    0.28    0.20
  -5 -10  -2    0.43    0.19
   4  10   2    2.15    0.15
   4  10   2    1.88    0.21
   4  10   2    2.15    0.25
  -4 -10  -2    2.00    0.23
   3  10   2    0.77    0.11
   3  10   2    0.47    0.16
   3  10   2    0.66    0.19
  -3 -10  -2    0.97    0.18
   2  10   2    0.80    0.17
   2  10   2    0.54    0.11
   2  10   2    0.68    0.16
  -2 -10  -2    0.42    0.16
  -2 -10  -2    0.64    0.07
   1  10   2    0.82    0.15
   1  10   2    1.39    0.15
   1  10   2    1.50    0.14
   1  10   2    1.39    0.11
  -1 -10  -2    1.14    0.17
  -1 -10  -2    1.38    0.11
   0  10   2   19.38    0.46
   0  10   2   19.39    0.44
   0  10   2   19.79    0.48
   0  10   2   19.05    0.48
   0 -10  -2   19.13    0.49
  -1  10   2    9.05    0.22
  -1  10   2    9.34    0.31
  -1  10   2    9.34    0.32
  -1  10   2    9.23    0.30
   1 -10  -2    8.32    0.30
  -2  10   2    0.23    0.12
  -2  10   2    0.49    0.17
  -2  10   2    0.21    0.13
   2 -10  -2    0.57    0.17
  -3  10   2    1.90    0.14
  -3  10   2    1.84    0.19
  -3  10   2    1.57    0.17
   3 -10  -2    1.98    0.20
  -4  10   2    3.27    0.19
  -4  10   2    3.70    0.27
  -4  10   2    3.39    0.27
   4 -10  -2    3.64    0.29
   4 -10  -2    3.43    0.16
  -5  10   2    0.67    0.13
  -5  10   2    0.47    0.19
  -5  10   2    0.49    0.17
   5 -10  -2    0.60    0.12
   5 -10  -2    0.65    0.19
  -6  10   2    2.04    0.20
  -6  10   2    2.07    0.28
  -6  10   2    2.13    0.23
   6 -10  -2    1.94    0.26
  -7  10   2    0.69    0.21
  -7  10   2    0.44    0.27
   7 -10  -2    0.32    0.27
  -8  10   2    1.12    0.31
  -8  10   2    1.34    0.25
   8 -10  -2    1.52    0.32
  -9  10   2    0.58    0.33
   9 -10  -2    0.25    0.33
   9  11   2   -0.88    0.34
  -9 -11  -2    0.31    0.35
   8  11   2    0.01    0.26
   8  11   2    0.52    0.33
  -8 -11  -2   -0.16    0.29
   7  11   2    1.95    0.32
   7  11   2    2.33    0.28
  -7 -11  -2    1.80    0.31
   6  11   2    0.97    0.27
   6  11   2    1.60    0.25
  -6 -11  -2    1.59    0.27
   5  11   2    3.70    0.18
   5  11   2    3.79    0.28
   5  11   2    3.81    0.31
  -5 -11  -2    3.18    0.27
   4  11   2    3.77    0.30
   4  11   2    3.83    0.18
   4  11   2    4.15    0.33
  -4 -11  -2    3.51    0.28
   3  11   2   11.04    0.38
   3  11   2   11.62    0.31
   3  11   2   11.47    0.42
  -3 -11  -2   12.04    0.39
   2  11   2    4.05    0.28
   2  11   2    4.46    0.28
   2  11   2    4.50    0.21
  -2 -11  -2    4.32    0.14
  -2 -11  -2    4.33    0.27
   1  11   2   10.31    0.33
   1  11   2   10.54    0.28
   1  11   2   10.99    0.34
   1  11   2   10.44    0.32
  -1 -11  -2   10.18    0.27
  -1 -11  -2   10.43    0.35
   0  11   2    5.13    0.26
   0  11   2    5.38    0.26
   0  11   2    5.28    0.23
   0  11   2    5.25    0.21
   0 -11  -2    5.04    0.27
  -1  11   2    7.03    0.29
  -1  11   2    7.34    0.28
  -1  11   2    7.57    0.30
  -1  11   2    7.10    0.19
   1 -11  -2    6.51    0.28
  -2  11   2   25.00    0.57
  -2  11   2   24.67    0.62
  -2  11   2   24.71    0.60
   2 -11  -2   25.64    0.62
  -3  11   2    0.13    0.16
  -3  11   2    0.15    0.11
  -3  11   2    0.03    0.15
   3 -11  -2   -0.10    0.15
  -4  11   2    0.79    0.13
  -4  11   2    0.60    0.18
  -4  11   2    0.79    0.18
   4 -11  -2    0.81    0.09
   4 -11  -2    0.84    0.19
  -5  11   2    2.10    0.24
  -5  11   2    2.69    0.24
  -5  11   2    2.60    0.17
   5 -11  -2    2.64    0.18
   5 -11  -2    2.08    0.25
  -6  11   2    1.30    0.25
  -6  11   2    1.73    0.23
   6 -11  -2    1.48    0.27
  -7  11   2    0.23    0.21
  -7  11   2    0.09    0.27
   7 -11  -2    0.11    0.27
  -8  11   2   -0.11    0.22
  -8  11   2   -0.25    0.29
   8 -11  -2   -0.09    0.30
  -9  11   2    1.29    0.36
   9 -11  -2    1.48    0.37
   9  12   2    1.29    0.32
   9  12   2    0.87    0.40
  -9 -12  -2    1.84    0.41
   8  12   2   -0.03    0.26
   8  12   2    0.08    0.32
  -8 -12  -2   -0.32    0.29
   7  12   2   -0.03    0.23
   7  12   2    0.14    0.30
  -7 -12  -2    0.06    0.27
   6  12   2    3.64    0.36
   6  12   2    3.74    0.31
  -6 -12  -2    3.21    0.32
   5  12   2    8.35    0.45
   5  12   2    7.86    0.37
  -5 -12  -2    8.41    0.43
   4  12   2    2.33    0.17
   4  12   2    2.54    0.26
   4  12   2    2.39    0.24
  -4 -12  -2    2.22    0.24
   3  12   2    0.08    0.15
   3  12   2    0.02    0.17
   3  12   2    0.00    0.10
  -3 -12  -2   -0.20    0.16
   2  12   2   10.75    0.37
   2  12   2   10.95    0.37
   2  12   2   11.03    0.32
  -2 -12  -2   11.09    0.37
  -2 -12  -2   11.08    0.26
   1  12   2   58.40    1.23
   1  12   2   60.35    1.21
   1  12   2   59.03    1.21
   1  12   2   59.29    1.17
  -1 -12  -2   60.53    1.24
  -1 -12  -2   59.53    1.17
   0  12   2   18.27    0.49
   0  12   2   18.84    0.46
   0  12   2   18.57    0.47
   0  12   2   18.40    0.43
   0 -12  -2   18.58    0.50
  -1  12   2  197.09    3.63
  -1  12   2  189.67    3.71
  -1  12   2  197.14    3.71
  -1  12   2  194.63    3.72
   1 -12  -2  192.17    3.72
  -2  12   2    3.96    0.28
  -2  12   2    4.24    0.25
  -2  12   2    4.03    0.23
   2 -12  -2    4.23    0.26
  -3  12   2    0.93    0.19
  -3  12   2    0.59    0.13
  -3  12   2    0.76    0.19
   3 -12  -2    0.84    0.17
  -4  12   2    0.33    0.18
  -4  12   2    0.09    0.19
  -4  12   2    0.39    0.12
   4 -12  -2    0.24    0.18
  -5  12   2    9.60    0.41
  -5  12   2    9.78    0.32
  -5  12   2    9.59    0.42
   5 -12  -2   10.03    0.41
  -6  12   2    3.01    0.32
  -6  12   2    2.47    0.26
   6 -12  -2    2.27    0.30
  -7  12   2    4.81    0.40
  -7  12   2    3.67    0.31
   7 -12  -2    3.94    0.38
  -8  12   2    1.18    0.33
  -8  12   2    1.12    0.26
   8 -12  -2    0.71    0.32
  -9  12   2    0.76    0.35
   9 -12  -2    0.01    0.32
   9  13   2    0.32    0.30
   9  13   2   -0.27    0.32
  -9 -13  -2    0.41    0.34
   8  13   2    1.02    0.29
   8  13   2    1.30    0.38
  -8 -13  -2    0.97    0.34
   7  13   2    0.64    0.27
   7  13   2    0.56    0.29
  -7 -13  -2    0.81    0.29
   6  13   2    1.23    0.30
   6  13   2    1.49    0.27
  -6 -13  -2    1.55    0.30
   5  13   2    1.56    0.25
   5  13   2    1.15    0.27
  -5 -13  -2    1.44    0.25
   4  13   2    6.44    0.24
   4  13   2    6.56    0.39
   4  13   2    6.62    0.33
  -4 -13  -2    5.68    0.33
   3  13   2    0.21    0.11
   3  13   2   -0.05    0.18
   3  13   2    0.12    0.17
  -3 -13  -2   -0.01    0.17
   2  13   2    0.81    0.16
   2  13   2    1.05    0.19
   2  13   2    0.91    0.14
  -2 -13  -2    0.78    0.18
  -2 -13  -2    1.09    0.09
   1  13   2   16.17    0.46
   1  13   2   15.93    0.43
   1  13   2   15.22    0.38
   1  13   2   15.31    0.42
  -1 -13  -2   15.53    0.38
  -1 -13  -2   15.76    0.46
   0  13   2    0.15    0.10
   0  13   2   -0.05    0.16
   0  13   2    0.17    0.12
   0  13   2    0.09    0.15
   0 -13  -2    0.12    0.16
  -1  13   2    0.78    0.15
  -1  13   2    0.88    0.16
  -1  13   2    0.79    0.09
  -1  13   2    1.09    0.17
   1 -13  -2    0.66    0.17
  -2  13   2   16.09    0.47
  -2  13   2   15.55    0.47
  -2  13   2   16.51    0.43
   2 -13  -2   15.62    0.46
  -3  13   2    0.64    0.19
  -3  13   2    0.85    0.17
  -3  13   2    0.98    0.14
   3 -13  -2    0.58    0.19
  -4  13   2    7.75    0.28
  -4  13   2    7.35    0.36
  -4  13   2    7.46    0.39
   4 -13  -2    7.43    0.37
  -5  13   2   18.29    0.47
  -5  13   2   18.44    0.56
  -5  13   2   17.32    0.58
   5 -13  -2   19.98    0.60
  -6  13   2    3.97    0.36
  -6  13   2    4.07    0.31
   6 -13  -2    4.50    0.36
  -7  13   2    1.50    0.26
  -7  13   2    0.92    0.28
   7 -13  -2    1.50    0.32
  -8  13   2    2.45    0.31
  -8  13   2    2.50    0.38
   8 -13  -2    1.90    0.36
  -9  13   2    2.03    0.39
   9 -13  -2    1.97    0.40
   9  14   2    1.14    0.41
   9  14   2    0.13    0.30
  -9 -14  -2    0.37    0.36
   8  14   2    0.17    0.33
   8  14   2   -0.22    0.27
  -8 -14  -2   -0.26    0.29
   7  14   2   -0.11    0.25
   7  14   2   -0.20    0.30
  -7 -14  -2    0.17    0.28
   6  14   2    8.93    0.53
   6  14   2    8.10    0.46
  -6 -14  -2    8.93    0.51
   5  14   2   -0.04    0.22
   5  14   2   -0.06    0.24
  -5 -14  -2    0.06    0.23
   4  14   2    0.02    0.12
   4  14   2   -0.05    0.20
   4  14   2    0.19    0.20
  -4 -14  -2   -0.07    0.17
   3  14   2    3.52    0.27
   3  14   2    4.29    0.23
   3  14   2    4.21    0.32
  -3 -14  -2    4.10    0.31
   2  14   2   15.02    0.42
   2  14   2   16.11    0.49
   2  14   2   15.81    0.47
  -2 -14  -2   16.02    0.36
  -2 -14  -2   16.00    0.48
   1  14   2   -0.06    0.13
   1  14   2    0.04    0.13
   1  14   2   -0.06    0.16
   1  14   2    0.07    0.10
  -1 -14  -2    0.09    0.10
  -1 -14  -2   -0.03    0.14
   0  14   2    0.42    0.16
   0  14   2    0.39    0.17
   0  14   2    0.21    0.13
   0  14   2    0.43    0.11
   0 -14  -2    0.50    0.17
  -1  14   2   24.96    0.63
  -1  14   2   25.62    0.61
  -1  14   2   25.19    0.52
  -1  14   2   25.19    0.61
   1 -14  -2   25.18    0.64
  -2  14   2    0.50    0.16
  -2  14   2    0.74    0.15
  -2  14   2    0.63    0.17
   2 -14  -2    0.77    0.19
  -3  14   2    1.13    0.15
  -3  14   2    0.94    0.18
  -3  14   2    1.23    0.21
   3 -14  -2    1.06    0.18
  -4  14   2    0.55    0.18
  -4  14   2    0.30    0.19
  -4  14   2    0.64    0.13
   4 -14  -2    0.81    0.21
  -5  14   2   23.19    0.70
  -5  14   2   25.13    0.67
  -5  14   2   24.36    0.59
   5 -14  -2   25.29    0.71
  -6  14   2    7.59    0.42
  -6  14   2    7.65    0.49
   6 -14  -2    8.25    0.48
  -7  14   2    0.41    0.29
  -7  14   2    0.33    0.24
   7 -14  -2    0.92    0.31
  -8  14   2    0.31    0.26
  -8  14   2    0.32    0.31
   8 -14  -2    0.17    0.30
  -9  14   2    1.58    0.40
   9 -14  -2    1.47    0.40
   8  15   2    0.06    0.28
   8  15   2    0.28    0.36
  -8 -15  -2    0.54    0.34
   7  15   2    1.56    0.31
   7  15   2    1.57    0.36
  -7 -15  -2    1.95    0.34
   6  15   2    9.95    0.50
   6  15   2    9.80    0.56
  -6 -15  -2    9.79    0.52
   5  15   2    7.07    0.46
   5  15   2    6.48    0.42
  -5 -15  -2    6.71    0.39
   4  15   2   10.21    0.33
   4  15   2    9.66    0.44
   4  15   2    9.48    0.45
  -4 -15  -2    9.08    0.43
   3  15   2   -0.03    0.17
   3  15   2    0.29    0.13
   3  15   2    0.14    0.18
  -3 -15  -2    0.47    0.20
   2  15   2    1.89    0.17
   2  15   2    1.70    0.20
   2  15   2    1.78    0.20
  -2 -15  -2    1.85    0.14
  -2 -15  -2    1.52    0.19
   1  15   2    0.64    0.14
   1  15   2    0.55    0.16
   1  15   2    0.63    0.11
   1  15   2    0.75    0.19
  -1 -15  -2    0.81    0.12
  -1 -15  -2    0.60    0.18
   0  15   2    5.50    0.23
   0  15   2    5.72    0.25
   0  15   2    5.60    0.29
   0  15   2    5.67    0.30
  -1  15   2    8.76    0.33
  -1  15   2    8.23    0.35
  -1  15   2    8.22    0.32
  -1  15   2    8.53    0.23
   1 -15  -2    8.35    0.36
  -2  15   2    1.72    0.21
  -2  15   2    1.79    0.18
  -2  15   2    1.49    0.21
   2 -15  -2    1.62    0.21
  -3  15   2   19.03    0.49
  -3  15   2   17.56    0.53
  -3  15   2   18.64    0.56
   3 -15  -2   17.88    0.54
  -4  15   2    3.10    0.22
  -4  15   2    3.18    0.28
  -4  15   2    3.33    0.29
   4 -15  -2    2.94    0.28
  -5  15   2   21.17    0.64
  -5  15   2   20.60    0.67
  -5  15   2   20.02    0.52
   5 -15  -2   20.17    0.65
  -6  15   2    3.93    0.38
  -6  15   2    3.26    0.31
   6 -15  -2    4.01    0.36
  -7  15   2    0.72    0.31
  -7  15   2    0.35    0.25
   7 -15  -2    0.16    0.28
  -8  15   2    4.64    0.47
  -8  15   2    5.56    0.40
   8 -15  -2    5.34    0.45
  -9  15   2    0.06    0.35
   9 -15  -2    0.54    0.36
   8  16   2    0.07    0.29
   8  16   2   -0.19    0.34
  -8 -16  -2    0.56    0.33
   7  16   2    0.15    0.33
   7  16   2   -0.13    0.28
  -7 -16  -2    0.69    0.31
   6  16   2   15.06    0.60
   6  16   2   14.79    0.64
  -6 -16  -2   13.68    0.61
   5  16   2    0.62    0.26
   5  16   2    0.50    0.26
  -5 -16  -2    0.41    0.25
   4  16   2   11.40    0.50
   4  16   2   11.84    0.49
   4  16   2   11.79    0.36
  -4 -16  -2   11.38    0.48
   3  16   2    7.94    0.40
   3  16   2    8.12    0.39
   3  16   2    6.74    0.30
  -3 -16  -2    7.89    0.39
   2  16   2   33.68    0.77
   2  16   2   33.80    0.80
   2  16   2   32.02    0.82
  -2 -16  -2   34.72    0.70
  -2 -16  -2   34.38    0.83
   1  16   2   22.82    0.58
   1  16   2   22.59    0.56
   1  16   2   23.35    0.62
   1  16   2   23.03    0.53
  -1 -16  -2   22.54    0.61
  -1 -16  -2   22.75    0.53
   0  16   2    2.34    0.21
   0  16   2    2.34    0.16
   0  16   2    2.39    0.22
   0  16   2    2.52    0.19
   0 -16  -2    2.90    0.24
  -1  16   2    0.16    0.15
  -1  16   2    0.14    0.09
  -1  16   2    0.32    0.16
  -1  16   2    0.10    0.15
   1 -16  -2    0.46    0.17
  -2  16   2    4.06    0.28
  -2  16   2    4.23    0.27
  -2  16   2    4.32    0.32
   2 -16  -2    4.45    0.32
  -3  16   2   -0.04    0.14
  -3  16   2    0.17    0.19
  -3  16   2   -0.17    0.20
   3 -16  -2    0.17    0.20
  -4  16   2    0.14    0.21
  -4  16   2    0.27    0.14
  -4  16   2    0.26    0.23
   4 -16  -2    0.47    0.23
  -5  16   2    2.23    0.30
  -5  16   2    1.89    0.31
  -5  16   2    1.63    0.24
   5 -16  -2    1.67    0.28
  -6  16   2    3.91    0.38
  -6  16   2    4.20    0.35
   6 -16  -2    4.01    0.37
  -7  16   2    0.62    0.27
  -7  16   2    0.87    0.33
   7 -16  -2    0.53    0.30
  -8  16   2    1.37    0.31
  -8  16   2    0.98    0.37
   8 -16  -2    0.43    0.31
   8  17   2    0.03    0.35
   8  17   2   -0.05    0.30
  -8 -17  -2    0.25    0.30
   7  17   2    0.59    0.31
   7  17   2    0.12    0.33
  -7 -17  -2    0.21    0.31
   6  17   2    2.78    0.33
   6  17   2    3.01    0.38
  -6 -17  -2    2.60    0.32
   5  17   2   -0.10    0.25
   5  17   2    0.43    0.26
  -5 -17  -2    0.49    0.25
   4  17   2    3.93    0.26
   4  17   2    3.90    0.32
   4  17   2    5.14    0.40
  -4 -17  -2    3.44    0.31
   3  17   2    5.38    0.27
   3  17   2    5.89    0.38
   3  17   2    5.23    0.35
  -3 -17  -2    5.71    0.37
   2  17   2    0.01    0.17
   2  17   2    0.15    0.20
   2  17   2   -0.07    0.14
  -2 -17  -2   -0.09    0.16
  -2 -17  -2    0.13    0.10
   1  17   2   -0.01    0.15
   1  17   2    0.10    0.14
   1  17   2    0.12    0.12
   1  17   2    0.20    0.18
  -1 -17  -2    0.01    0.11
  -1 -17  -2   -0.17    0.17
   0  17   2   15.24    0.39
   0  17   2   14.66    0.42
   0  17   2   14.99    0.46
   0  17   2   14.93    0.46
   0 -17  -2   14.17    0.46
  -1  17   2    5.39    0.32
  -1  17   2    4.64    0.28
  -1  17   2    5.04    0.19
  -1  17   2    4.79    0.29
   1 -17  -2    4.79    0.32
  -2  17   2   12.91    0.45
  -2  17   2   12.99    0.43
  -2  17   2   13.66    0.47
   2 -17  -2   13.05    0.48
  -3  17   2   13.39    0.46
  -3  17   2   13.01    0.42
  -3  17   2   13.47    0.50
   3 -17  -2   13.43    0.48
  -4  17   2    1.69    0.28
  -4  17   2    1.77    0.25
  -4  17   2    1.62    0.19
   4 -17  -2    2.24    0.29
  -5  17   2   10.22    0.49
  -5  17   2    9.78    0.47
   5 -17  -2   10.16    0.48
  -6  17   2    0.31    0.26
  -6  17   2    0.07    0.24
   6 -17  -2   -0.02    0.24
  -7  17   2    3.04    0.34
  -7  17   2    2.91    0.39
   7 -17  -2    3.58    0.39
  -8  17   2    0.18    0.35
  -8  17   2    0.06    0.27
   8 -17  -2    0.66    0.33
   8  18   2   -0.21    0.36
   8  18   2   -0.29    0.31
  -8 -18  -2   -0.24    0.32
   7  18   2    1.90    0.36
   7  18   2    2.95    0.41
  -7 -18  -2    2.15    0.38
   6  18   2   10.22    0.59
   6  18   2    8.85    0.53
  -6 -18  -2    9.84    0.55
   5  18   2   13.02    0.56
   5  18   2   12.87    0.58
  -5 -18  -2   11.88    0.55
   4  18   2   27.54    0.79
   4  18   2   27.86    0.67
   4  18   2   28.40    0.79
  -4 -18  -2   27.19    0.77
   3  18   2    8.07    0.40
   3  18   2    8.04    0.40
   3  18   2    8.35    0.34
  -3 -18  -2    8.59    0.43
   2  18   2    3.59    0.26
   2  18   2    3.11    0.27
   2  18   2    3.32    0.25
  -2 -18  -2    3.05    0.28
  -2 -18  -2    3.33    0.18
   1  18   2    0.21    0.17
   1  18   2    0.10    0.17
   1  18   2    0.07    0.12
   1  18   2    0.07    0.15
  -1 -18  -2    0.13    0.17
  -1 -18  -2    0.19    0.12
   0  18   2    0.70    0.16
   0  18   2    0.88    0.20
   0  18   2    0.67    0.13
   0  18   2    0.70    0.19
   0 -18  -2    0.57    0.20
  -1  18   2    0.54    0.17
  -1  18   2    0.69    0.18
  -1  18   2    1.03    0.20
  -1  18   2    0.37    0.10
   1 -18  -2    0.95    0.21
  -2  18   2    0.37    0.16
  -2  18   2    0.25    0.20
  -2  18   2    0.04    0.18
   2 -18  -2   -0.11    0.18
  -3  18   2    0.74    0.23
  -3  18   2    0.82    0.17
  -3  18   2    0.69    0.21
   3 -18  -2    0.67    0.21
  -4  18   2    0.30    0.24
  -4  18   2   -0.05    0.21
  -4  18   2    0.26    0.16
   4 -18  -2    0.09    0.23
  -5  18   2    5.96    0.48
  -5  18   2    6.70    0.40
   5 -18  -2    6.41    0.48
  -6  18   2   10.97    0.59
  -6  18   2   10.23    0.48
   6 -18  -2   10.17    0.57
  -7  18   2    2.80    0.39
  -7  18   2    3.80    0.37
   7 -18  -2    4.13    0.42
  -8  18   2    0.31    0.29
  -8  18   2    0.57    0.36
   8 -18  -2   -0.29    0.32
   8  19   2    2.16    0.43
   8  19   2    1.85    0.38
  -8 -19  -2    1.49    0.35
   7  19   2    0.49    0.31
   7  19   2   -0.26    0.32
  -7 -19  -2    0.33    0.33
   6  19   2   -0.01    0.30
   6  19   2    0.15    0.29
  -6 -19  -2    0.01    0.25
   5  19   2   -0.20    0.27
   5  19   2    0.11    0.26
  -5 -19  -2    0.04    0.26
   4  19   2    1.75    0.29
   4  19   2    1.46    0.26
   4  19   2    1.49    0.19
  -4 -19  -2    1.46    0.28
   3  19   2    0.77    0.18
   3  19   2    0.68    0.24
   3  19   2    0.84    0.23
  -3 -19  -2    0.78    0.24
   2  19   2    0.05    0.18
   2  19   2   -0.06    0.18
   2  19   2    0.15    0.16
  -2 -19  -2    0.11    0.19
   1  19   2    8.58    0.37
   1  19   2    9.22    0.35
   1  19   2    8.89    0.31
   1  19   2    8.37    0.38
  -1 -19  -2    9.20    0.31
  -1 -19  -2    8.38    0.41
   0  19   2    0.21    0.19
   0  19   2    0.19    0.13
   0  19   2    0.22    0.19
   0  19   2    0.33    0.15
   0 -19  -2   -0.02    0.19
  -1  19   2   -0.19    0.16
  -1  19   2   -0.04    0.17
  -1  19   2    0.02    0.18
   1 -19  -2   -0.11    0.19
  -2  19   2    0.62    0.20
  -2  19   2    0.18    0.20
  -2  19   2    0.43    0.18
   2 -19  -2    0.46    0.22
  -3  19   2    0.08    0.16
  -3  19   2    0.14    0.19
  -3  19   2    0.09    0.22
   3 -19  -2    0.02    0.21
  -4  19   2    0.95    0.19
  -4  19   2    0.65    0.28
  -4  19   2    0.97    0.22
   4 -19  -2    1.05    0.27
  -5  19   2    7.15    0.46
  -5  19   2    7.11    0.46
   5 -19  -2    7.54    0.49
  -6  19   2    1.91    0.30
  -6  19   2    1.61    0.36
   6 -19  -2    1.85    0.34
  -7  19   2    1.20    0.32
  -7  19   2    1.51    0.31
   7 -19  -2    1.22    0.35
  -8  19   2    0.29    0.37
  -8  19   2    0.40    0.29
   8 -19  -2    0.05    0.34
   7  20   2    2.97    0.41
   7  20   2    3.61    0.38
  -7 -20  -2    2.22    0.39
   6  20   2    1.00    0.34
   6  20   2    0.76    0.31
  -6 -20  -2    1.33    0.33
   5  20   2    3.21    0.37
   5  20   2    2.62    0.34
  -5 -20  -2    2.81    0.35
   4  20   2    6.72    0.47
   4  20   2    7.09    0.48
   4  20   2    6.37    0.34
  -4 -20  -2    6.91    0.46
   3  20   2    1.10    0.24
   3  20   2    1.10    0.20
   3  20   2    1.13    0.25
  -3 -20  -2    1.29    0.27
   2  20   2    4.94    0.35
   2  20   2    4.61    0.34
   2  20   2    5.30    0.33
  -2 -20  -2    4.83    0.38
   1  20   2    1.44    0.24
   1  20   2    1.29    0.21
   1  20   2    1.57    0.20
   1  20   2    1.58    0.17
  -1 -20  -2    1.29    0.22
  -1 -20  -2    1.61    0.17
   0  20   2    2.82    0.25
   0  20   2    3.76    0.24
   0  20   2    3.63    0.24
   0  20   2    3.77    0.29
   0 -20  -2    3.63    0.30
  -1  20   2    0.00    0.17
  -1  20   2    0.01    0.18
  -1  20   2   -0.21    0.17
   1 -20  -2    0.05    0.20
  -2  20   2   -0.15    0.20
  -2  20   2    0.39    0.18
  -2  20   2    0.39    0.23
   2 -20  -2    0.40    0.24
  -3  20   2    2.28    0.30
  -3  20   2    1.81    0.25
  -3  20   2    2.37    0.23
   3 -20  -2    2.46    0.30
  -4  20   2    1.07    0.29
  -4  20   2    0.83    0.26
  -4  20   2    1.31    0.20
   4 -20  -2    0.88    0.28
  -5  20   2    7.31    0.46
  -5  20   2    7.74    0.53
   5 -20  -2    6.97    0.46
  -6  20   2    1.99    0.35
  -6  20   2    2.06    0.33
   6 -20  -2    1.56    0.34
  -7  20   2    4.81    0.47
  -7  20   2    3.96    0.39
   7 -20  -2    4.01    0.42
   7  21   2    0.91    0.37
   7  21   2    0.50    0.33
  -7 -21  -2    0.89    0.34
   6  21   2    1.46    0.32
   6  21   2    1.81    0.35
  -6 -21  -2    1.65    0.35
   5  21   2    5.74    0.42
   5  21   2    6.26    0.45
  -5 -21  -2    6.26    0.50
   4  21   2    0.28    0.18
   4  21   2   -0.01    0.25
   4  21   2    0.01    0.26
  -4 -21  -2   -0.03    0.25
   3  21   2    2.31    0.28
   3  21   2    2.88    0.29
   3  21   2    2.47    0.24
  -3 -21  -2    1.98    0.29
   2  21   2    2.47    0.25
   2  21   2    2.66    0.30
   2  21   2    2.30    0.24
  -2 -21  -2    2.50    0.30
   1  21   2    1.05    0.16
   1  21   2    0.75    0.21
   1  21   2    0.76    0.18
   1  21   2    0.30    0.23
  -1 -21  -2    0.75    0.24
  -1 -21  -2    0.82    0.16
   0  21   2    0.83    0.23
   0  21   2    1.17    0.19
   0  21   2    1.02    0.23
   0 -21  -2    0.56    0.23
  -1  21   2    1.62    0.23
  -1  21   2    1.57    0.22
  -1  21   2    1.41    0.23
   1 -21  -2    1.60    0.27
  -2  21   2    3.35    0.30
  -2  21   2    3.90    0.28
  -2  21   2    4.20    0.33
   2 -21  -2    4.32    0.35
  -3  21   2    0.29    0.23
  -3  21   2    0.20    0.24
  -3  21   2    0.53    0.18
   3 -21  -2    0.59    0.26
  -4  21   2    0.55    0.25
  -4  21   2    0.49    0.19
  -4  21   2    0.17    0.24
   4 -21  -2    0.49    0.27
  -5  21   2    2.22    0.32
  -5  21   2    1.57    0.31
   5 -21  -2    1.92    0.34
  -6  21   2    2.31    0.38
  -6  21   2    2.29    0.33
   6 -21  -2    1.39    0.34
  -7  21   2   -0.24    0.29
  -7  21   2    0.76    0.38
   7 -21  -2    0.51    0.33
   7  22   2    1.00    0.39
   7  22   2    0.84    0.36
  -7 -22  -2    0.84    0.36
   6  22   2   10.18    0.60
   6  22   2   10.31    0.62
  -6 -22  -2    9.79    0.60
   5  22   2    1.60    0.33
   5  22   2    2.30    0.36
  -5 -22  -2    1.56    0.34
   4  22   2    0.48    0.27
   4  22   2    0.50    0.26
  -4 -22  -2    0.52    0.28
   3  22   2    1.55    0.22
   3  22   2    1.20    0.25
   3  22   2    1.53    0.30
  -3 -22  -2    1.41    0.30
   2  22   2    4.95    0.36
   2  22   2    5.31    0.36
   2  22   2    5.32    0.38
  -2 -22  -2    5.25    0.37
   1  22   2    0.19    0.17
   1  22   2    0.22    0.23
   1  22   2    0.06    0.17
   1  22   2   -0.19    0.19
  -1 -22  -2   -0.14    0.23
   0  22   2    2.50    0.23
   0  22   2    2.36    0.27
   0  22   2    2.26    0.25
   0 -22  -2    2.47    0.30
   0 -22  -2    2.20    0.22
  -1  22   2    2.20    0.26
  -1  22   2    2.54    0.26
  -1  22   2    3.05    0.27
   1 -22  -2    3.45    0.32
  -2  22   2    1.31    0.24
  -2  22   2    1.25    0.22
  -2  22   2    1.49    0.25
   2 -22  -2    1.20    0.28
  -3  22   2    1.32    0.22
  -3  22   2    1.64    0.29
  -3  22   2    0.94    0.26
   3 -22  -2    1.12    0.29
  -4  22   2    0.07    0.26
  -4  22   2    0.06    0.25
   4 -22  -2   -0.25    0.26
  -5  22   2    0.64    0.29
  -5  22   2    1.97    0.35
   5 -22  -2    0.63    0.29
  -6  22   2    1.98    0.38
  -6  22   2    1.90    0.34
   6 -22  -2    2.28    0.37
  -7  22   2    0.10    0.30
  -7  22   2    0.35    0.33
   7 -22  -2   -0.19    0.32
   7  23   2   -0.26    0.34
   7  23   2    0.46    0.37
  -7 -23  -2   -0.13    0.34
   6  23   2    1.35    0.36
   6  23   2    1.40    0.36
  -6 -23  -2    1.80    0.36
   5  23   2    3.49    0.39
   5  23   2    3.61    0.39
  -5 -23  -2    3.22    0.39
   4  23   2    5.84    0.48
   4  23   2    6.37    0.50
  -4 -23  -2    6.62    0.50
   3  23   2    4.54    0.33
   3  23   2    5.53    0.40
   3  23   2    4.37    0.34
  -3 -23  -2    5.09    0.40
   2  23   2   13.77    0.57
   2  23   2   14.26    0.51
   2  23   2   13.97    0.50
  -2 -23  -2   15.09    0.58
   1  23   2    4.11    0.31
   1  23   2    4.92    0.36
   1  23   2    3.84    0.30
  -1 -23  -2    4.11    0.36
   0  23   2    1.89    0.27
   0  23   2    1.29    0.24
   0  23   2    1.71    0.22
   0 -23  -2    1.30    0.20
   0 -23  -2    1.85    0.28
  -1  23   2    1.03    0.23
  -1  23   2    0.88    0.23
  -1  23   2    1.12    0.23
   1 -23  -2    0.79    0.24
  -2  23   2    0.55    0.23
  -2  23   2    0.68    0.25
  -2  23   2    0.44    0.21
   2 -23  -2    0.37    0.26
  -3  23   2    0.86    0.24
  -3  23   2    0.80    0.21
  -3  23   2    0.93    0.28
   3 -23  -2    0.80    0.27
  -4  23   2    0.33    0.29
  -4  23   2    0.06    0.22
   4 -23  -2    0.35    0.30
  -5  23   2    3.16    0.37
  -5  23   2    2.89    0.40
   5 -23  -2    2.94    0.38
  -6  23   2    0.58    0.35
  -6  23   2    0.09    0.26
   6 -23  -2   -0.20    0.30
  -7  23   2    0.68    0.40
  -7  23   2    0.05    0.31
   7 -23  -2    0.04    0.35
   6  24   2    0.90    0.36
   6  24   2    0.42    0.33
  -6 -24  -2    0.63    0.34
   5  24   2    0.09    0.28
   5  24   2   -0.23    0.29
  -5 -24  -2    0.41    0.30
   4  24   2   -0.43    0.29
   4  24   2    0.43    0.28
  -4 -24  -2    0.23    0.26
   3  24   2    0.18    0.21
   3  24   2    0.20    0.28
   3  24   2   -0.06    0.23
  -3 -24  -2    0.55    0.26
   2  24   2    0.51    0.21
   2  24   2   -0.03    0.20
   2  24   2    0.06    0.26
  -2 -24  -2    0.00    0.25
   1  24   2    7.98    0.47
   1  24   2    8.33    0.43
  -1 -24  -2    7.39    0.47
   0  24   2   22.13    0.62
   0  24   2   23.03    0.70
   0  24   2   22.71    0.69
   0 -24  -2   21.74    0.62
   0 -24  -2   21.99    0.72
  -1  24   2    6.44    0.39
  -1  24   2    6.72    0.44
  -1  24   2    5.66    0.39
   1 -24  -2    6.44    0.46
  -2  24   2   11.26    0.49
  -2  24   2   10.90    0.48
  -2  24   2   11.46    0.53
   2 -24  -2   11.67    0.52
  -3  24   2    0.75    0.28
  -3  24   2    0.24    0.20
  -3  24   2   -0.20    0.25
   3 -24  -2    0.02    0.27
  -4  24   2   -0.13    0.28
  -4  24   2    0.12    0.27
   4 -24  -2    0.17    0.27
  -5  24   2    5.33    0.44
  -5  24   2    5.35    0.46
   5 -24  -2    6.18    0.49
  -6  24   2    1.47    0.33
  -6  24   2    1.18    0.36
   6 -24  -2    1.54    0.37
   6  25   2    0.15    0.34
   6  25   2    0.69    0.36
  -6 -25  -2    0.30    0.35
   5  25   2    0.64    0.33
   5  25   2   -0.10    0.33
  -5 -25  -2    0.69    0.31
   4  25   2    1.35    0.33
   4  25   2    1.57    0.31
  -4 -25  -2    1.73    0.35
   3  25   2    0.12    0.25
   3  25   2    1.08    0.24
   3  25   2    0.80    0.26
  -3 -25  -2    1.34    0.31
   2  25   2    3.01    0.42
   2  25   2    2.88    0.29
   2  25   2    3.08    0.35
  -2 -25  -2    3.17    0.36
   1  25   2    1.85    0.30
   1  25   2    2.02    0.28
  -1 -25  -2    1.71    0.31
   0  25   2    0.36    0.23
   0  25   2   -0.02    0.23
   0  25   2    0.21    0.20
   0 -25  -2    0.39    0.24
   0 -25  -2    0.54    0.31
  -1  25   2    3.67    0.35
  -1  25   2    3.47    0.32
  -1  25   2    4.06    0.31
   1 -25  -2    3.61    0.36
  -2  25   2    1.39    0.30
  -2  25   2    0.96    0.24
  -2  25   2    1.42    0.28
   2 -25  -2    1.39    0.31
  -3  25   2    0.93    0.24
  -3  25   2    0.77    0.29
  -3  25   2    1.02    0.30
   3 -25  -2    0.49    0.30
  -4  25   2   -0.23    0.29
  -4  25   2    0.17    0.27
   4 -25  -2    0.11    0.31
  -5  25   2    1.92    0.35
  -5  25   2    1.82    0.35
   5 -25  -2    1.34    0.35
  -6  25   2   -0.14    0.34
  -6  25   2    0.14    0.30
   6 -25  -2   -0.06    0.35
   5  26   2    0.19    0.35
   5  26   2   -0.19    0.31
  -5 -26  -2   -0.15    0.31
   4  26   2    0.77    0.30
   4  26   2    1.09    0.31
  -4 -26  -2    1.34    0.35
   3  26   2    2.32    0.28
   3  26   2    2.42    0.31
   3  26   2    2.02    0.32
  -3 -26  -2    2.00    0.32
   2  26   2    0.61    0.24
   2  26   2    0.79    0.30
  -2 -26  -2    1.37    0.31
   1  26   2    0.23    0.26
   1  26   2    0.59    0.25
  -1 -26  -2    0.37    0.28
   0  26   2    0.05    0.25
   0  26   2    0.58    0.26
   0 -26  -2    0.06    0.28
  -1  26   2    1.81    0.29
  -1  26   2    1.74    0.31
  -1  26   2    2.46    0.28
   1 -26  -2    1.92    0.34
  -2  26   2    0.99    0.27
  -2  26   2    1.22    0.26
  -2  26   2    1.15    0.30
   2 -26  -2    0.95    0.30
  -3  26   2    4.03    0.32
  -3  26   2    3.37    0.35
  -3  26   2    3.87    0.38
   3 -26  -2    3.10    0.39
  -4  26   2   -0.11    0.30
  -4  26   2    0.55    0.29
   4 -26  -2    0.59    0.34
  -5  26   2    1.05    0.32
  -5  26   2    0.73    0.34
   5 -26  -2    1.75    0.40
   5  27   2   -0.18    0.34
   5  27   2   -0.29    0.32
  -5 -27  -2    0.31    0.32
   4  27   2    1.68    0.33
   4  27   2    2.17    0.38
  -4 -27  -2    2.38    0.38
   3  27   2    0.40    0.31
   3  27   2    0.51    0.24
  -3 -27  -2    0.38    0.31
   2  27   2    0.59    0.30
   2  27   2    1.25    0.26
  -2 -27  -2    0.88    0.30
   1  27   2   -0.30    0.22
   1  27   2    0.37    0.24
  -1 -27  -2   -0.47    0.27
   0  27   2    0.36    0.26
   0  27   2    0.41    0.25
   0 -27  -2    0.15    0.28
  -1  27   2    0.32    0.25
  -1  27   2    0.46    0.24
  -1  27   2    0.65    0.26
   1 -27  -2    0.39    0.31
   1 -27  -2    0.22    0.23
  -2  27   2    0.31    0.24
  -2  27   2    0.37    0.28
  -2  27   2    0.22    0.26
   2 -27  -2    0.33    0.30
  -3  27   2    0.73    0.31
  -3  27   2    0.40    0.27
  -3  27   2    0.58    0.29
   3 -27  -2    0.46    0.31
  -4  27   2    0.54    0.30
  -4  27   2    0.68    0.33
   4 -27  -2    0.35    0.34
  -5  27   2   -0.34    0.30
  -5  27   2    0.09    0.33
   5 -27  -2    0.04    0.33
   4  28   2   -0.11    0.33
   4  28   2   -0.63    0.29
  -4 -28  -2   -0.02    0.32
   3  28   2    0.03    0.24
   3  28   2   -0.10    0.31
  -3 -28  -2   -0.03    0.32
   2  28   2    0.07    0.28
   2  28   2    0.49    0.26
  -2 -28  -2    0.63    0.32
   1  28   2    0.01    0.25
   1  28   2    0.56    0.27
  -1 -28  -2   -0.21    0.29
   0  28   2   -0.17    0.26
   0  28   2    0.45    0.27
   0 -28  -2    0.31    0.28
  -1  28   2    0.49    0.29
  -1  28   2    0.69    0.27
   1 -28  -2    1.20    0.34
  -2  28   2    0.48    0.25
  -2  28   2    0.36    0.28
  -2  28   2    0.22    0.27
   2 -28  -2    0.02    0.31
  -3  28   2    0.02    0.27
  -3  28   2   -0.30    0.29
   3 -28  -2   -0.23    0.29
  -4  28   2    1.12    0.34
  -4  28   2    1.03    0.35
   4 -28  -2    0.43    0.34
   4  29   2   -0.07    0.34
  -4 -29  -2    0.01    0.34
   3  29   2    1.25    0.36
   3  29   2    1.30    0.36
  -3 -29  -2    1.91    0.35
   2  29   2   -0.01    0.25
   2  29   2    0.17    0.27
  -2 -29  -2   -0.13    0.31
   1  29   2    0.13    0.26
   1  29   2    0.38    0.26
  -1 -29  -2    0.38    0.30
   0  29   2    0.55    0.29
   0  29   2    1.03    0.31
   0 -29  -2    1.33    0.35
  -1  29   2    1.21    0.30
  -1  29   2    0.90    0.30
   1 -29  -2    1.02    0.34
  -2  29   2    1.08    0.31
  -2  29   2    0.61    0.28
  -2  29   2    0.88    0.27
   2 -29  -2    0.76    0.34
  -3  29   2    0.25    0.30
  -3  29   2   -0.08    0.29
   3 -29  -2   -0.27    0.32
  -4  29   2    0.32    0.33
  -4  29   2   -0.33    0.31
   4 -29  -2    0.04    0.31
   3  30   2    8.84    0.60
  -3 -30  -2    8.49    0.62
   2  30   2    1.14    0.29
   2  30   2    0.78    0.30
  -2 -30  -2    0.74    0.34
   1  30   2   -0.19    0.27
   1  30   2    0.53    0.29
  -1 -30  -2    0.03    0.30
   0  30   2    1.39    0.32
   0  30   2    0.60    0.28
   0 -30  -2    1.23    0.34
  -1  30   2    0.21    0.28
  -1  30   2    0.22    0.27
   1 -30  -2    0.10    0.31
  -2  30   2    0.20    0.30
  -2  30   2   -0.23    0.27
  -2  30   2    0.35    0.26
   2 -30  -2   -0.13    0.27
   2 -30  -2    0.55    0.34
  -3  30   2    0.12    0.29
  -3  30   2    0.20    0.31
   3 -30  -2   -0.19    0.34
   2  31   2    0.32    0.32
   2  31   2    0.67    0.29
  -2 -31  -2    0.51    0.35
   1  31   2   -0.11    0.28
   1  31   2    0.09    0.28
  -1 -31  -2    0.49    0.34
   0  31   2    1.58    0.33
   0  31   2    1.24    0.32
   0 -31  -2    0.85    0.34
  -1  31   2   -0.31    0.27
  -1  31   2    0.31    0.30
   1 -31  -2    0.21    0.32
  -2  31   2    0.98    0.34
  -2  31   2    0.89    0.30
   2 -31  -2    0.58    0.36
   0  32   2    1.15    0.32
   0  32   2    1.06    0.33
   0 -32  -2    0.54    0.35
   2 -31   3   -0.01    0.35
  -2  31  -3    0.01    0.33
   1 -31   3   -0.07    0.33
  -1  31  -3    0.44    0.31
  -1  31  -3   -0.35    0.26
   0 -31   3    0.00    0.32
   0  31  -3    0.25    0.29
   0  31  -3   -0.32    0.27
  -1 -31   3   -0.19    0.32
   1  31  -3    0.30    0.29
   1  31  -3    0.51    0.31
  -2 -31   3   -0.07    0.32
   2  31  -3   -0.35    0.27
   2  31  -3   -0.17    0.29
   3 -30   3    0.13    0.35
  -3  30  -3    0.40    0.33
  -3  30  -3    0.28    0.32
   2 -30   3    0.61    0.35
  -2  30  -3    1.73    0.33
  -2  30  -3    1.22    0.33
   1 -30   3   -0.16    0.33
  -1  30  -3    0.36    0.27
  -1  30  -3    0.09    0.30
   0 -30   3    0.93    0.31
   0  30  -3    1.31    0.33
   0  30  -3    1.05    0.30
  -1 -30   3   -0.23    0.30
   1  30  -3    0.19    0.28
   1  30  -3   -0.26    0.25
  -2 -30   3    0.95    0.34
   2  30  -3   -0.08    0.30
   2  30  -3    0.32    0.28
  -3 -30   3    1.09    0.36
   3  30  -3    1.11    0.32
   3  30  -3    1.37    0.31
   4 -29   3   -0.36    0.36
  -4  29  -3    0.47    0.33
  -4  29  -3    0.41    0.33
   3 -29   3    1.68    0.38
  -3  29  -3    1.51    0.34
  -3  29  -3    1.25    0.31
   2 -29   3    3.14    0.42
  -2  29  -3    2.61    0.38
  -2  29  -3    2.46    0.34
   1 -29   3   -0.12    0.31
  -1  29  -3    0.25    0.30
  -1  29  -3    0.33    0.26
   0 -29   3   -0.07    0.28
   0  29  -3    0.19    0.27
   0  29  -3    0.07    0.25
  -1 -29   3    0.52    0.32
   1  29  -3    0.72    0.29
   1  29  -3    0.19    0.28
  -2 -29   3    4.27    0.43
   2  29  -3    4.72    0.42
   2  29  -3    4.31    0.38
  -3 -29   3    0.15    0.28
   3  29  -3    0.34    0.26
   3  29  -3   -0.50    0.30
  -4 -29   3    0.21    0.32
   4  29  -3    0.27    0.34
   4 -28   3    2.06    0.41
  -4  28  -3    2.30    0.37
  -4  28  -3    2.09    0.38
   3 -28   3   -0.26    0.28
  -3  28  -3    0.14    0.30
  -3  28  -3   -0.38    0.28
   2 -28   3   -0.08    0.27
  -2  28  -3    0.07    0.26
  -2  28  -3    0.79    0.31
   1 -28   3   -0.19    0.29
  -1  28  -3   -0.03    0.28
  -1  28  -3    0.08    0.24
   0 -28   3    1.13    0.32
   0  28  -3    0.76    0.26
   0  28  -3    1.15    0.28
  -1 -28   3    1.83    0.31
   1  28  -3    1.43    0.31
   1  28  -3    1.65    0.31
  -2 -28   3    4.71    0.42
   2  28  -3    4.38    0.40
   2  28  -3    4.70    0.38
  -3 -28   3    3.24    0.40
   3  28  -3    3.31    0.33
   3  28  -3    2.47    0.37
  -4 -28   3    1.94    0.38
   4  28  -3    1.17    0.49
   4  28  -3    1.71    0.33
   5 -27   3    0.80    0.39
  -5  27  -3    0.11    0.31
  -5  27  -3    0.04    0.33
   4 -27   3    0.21    0.31
  -4  27  -3    0.59    0.32
  -4  27  -3    0.02    0.29
   3 -27   3    0.95    0.31
  -3  27  -3    0.86    0.31
  -3  27  -3    0.64    0.30
   2 -27   3    0.89    0.33
  -2  27  -3    0.80    0.28
  -2  27  -3    1.00    0.24
  -2  27  -3    0.71    0.29
   1 -27   3    1.86    0.33
  -1  27  -3    2.44    0.29
  -1  27  -3    2.55    0.30
  -1  27  -3    2.26    0.34
   0 -27   3    3.59    0.39
   0  27  -3    3.69    0.35
   0  27  -3    3.49    0.33
  -1 -27   3   -0.10    0.27
   1  27  -3   -0.07    0.24
   1  27  -3   -0.11    0.22
  -2 -27   3    1.75    0.33
   2  27  -3    1.61    0.29
   2  27  -3    1.36    0.32
  -3 -27   3    1.14    0.30
   3  27  -3    0.68    0.31
   3  27  -3    0.56    0.26
  -4 -27   3    2.19    0.38
   4  27  -3    1.74    0.33
   4  27  -3    2.37    0.30
   4  27  -3    2.20    0.38
  -5 -27   3    0.24    0.33
   5  27  -3    0.08    0.34
   5  27  -3    0.41    0.31
   5 -26   3    0.18    0.33
  -5  26  -3    0.41    0.30
  -5  26  -3    0.04    0.33
   4 -26   3    1.16    0.36
  -4  26  -3    0.77    0.32
  -4  26  -3    0.81    0.30
   3 -26   3   -0.31    0.27
  -3  26  -3    0.20    0.25
  -3  26  -3    0.00    0.27
   2 -26   3    0.36    0.31
  -2  26  -3    0.31    0.22
  -2  26  -3    0.85    0.27
  -2  26  -3    0.55    0.29
   1 -26   3    4.66    0.41
  -1  26  -3    4.36    0.36
  -1  26  -3    3.75    0.32
  -1  26  -3    4.43    0.34
   0 -26   3    0.70    0.29
   0  26  -3    0.34    0.26
   0  26  -3   -0.04    0.22
  -1 -26   3    1.94    0.33
   1  26  -3    2.12    0.31
   1  26  -3    1.96    0.30
  -2 -26   3   -0.10    0.28
   2  26  -3    0.04    0.24
   2  26  -3    0.50    0.25
  -3 -26   3    0.05    0.28
   3  26  -3    0.09    0.29
   3  26  -3    0.38    0.23
   3  26  -3    0.34    0.25
  -4 -26   3    0.58    0.32
   4  26  -3    0.12    0.22
   4  26  -3    0.44    0.29
   4  26  -3    0.82    0.33
  -5 -26   3   -0.12    0.31
   5  26  -3    0.11    0.32
   5  26  -3    0.03    0.31
   6 -25   3    2.67    0.44
  -6  25  -3    3.19    0.44
  -6  25  -3    3.05    0.39
   5 -25   3   -0.03    0.35
  -5  25  -3    0.24    0.32
  -5  25  -3   -0.15    0.25
   4 -25   3   -0.08    0.32
  -4  25  -3   -0.02    0.27
  -4  25  -3    0.18    0.30
   3 -25   3    0.45    0.30
  -3  25  -3    0.26    0.27
  -3  25  -3    0.48    0.25
   2 -25   3    5.39    0.41
  -2  25  -3    4.34    0.35
  -2  25  -3    4.31    0.33
  -2  25  -3    5.54    0.39
   1 -25   3    0.74    0.28
  -1  25  -3    0.12    0.23
  -1  25  -3    0.45    0.22
  -1  25  -3    0.18    0.22
   0 -25   3   -0.05    0.26
   0  25  -3    0.13    0.32
   0  25  -3    0.45    0.24
   0  25  -3   -0.20    0.24
  -1 -25   3    0.30    0.25
   1  25  -3   -0.37    0.22
   1  25  -3   -0.22    0.22
  -2 -25   3    3.84    0.37
   2  25  -3    3.66    0.36
   2  25  -3    3.79    0.33
  -3 -25   3    0.49    0.28
   3  25  -3    0.21    0.22
   3  25  -3    0.10    0.24
   3  25  -3   -0.28    0.27
  -4 -25   3    0.72    0.31
   4  25  -3    0.42    0.27
   4  25  -3    0.17    0.23
   4  25  -3    0.47    0.29
  -5 -25   3    0.38    0.31
   5  25  -3    0.79    0.32
   5  25  -3   -0.05    0.32
  -6 -25   3    0.18    0.32
   6  25  -3    0.03    0.35
   6  25  -3    0.28    0.36
   6 -24   3   -0.52    0.33
  -6  24  -3    0.43    0.29
  -6  24  -3    0.08    0.34
   5 -24   3   -0.12    0.29
  -5  24  -3    0.30    0.31
  -5  24  -3    0.33    0.29
   4 -24   3   -0.09    0.27
  -4  24  -3   -0.16    0.27
  -4  24  -3    0.19    0.28
   3 -24   3    3.98    0.40
  -3  24  -3    3.27    0.34
  -3  24  -3    3.78    0.36
   2 -24   3   -0.17    0.23
  -2  24  -3    0.36    0.23
  -2  24  -3   -0.12    0.19
  -2  24  -3   -0.12    0.25
   1 -24   3    0.94    0.28
  -1  24  -3    0.48    0.22
  -1  24  -3    0.28    0.25
  -1  24  -3    0.73    0.22
   0 -24   3    5.05    0.40
   0  24  -3    5.77    0.39
   0  24  -3    6.45    0.34
   0  24  -3    5.74    0.40
  -1 -24   3    2.96    0.31
   1  24  -3    3.90    0.34
   1  24  -3    4.00    0.33
  -2 -24   3   -0.22    0.22
   2  24  -3   -0.28    0.19
   2  24  -3    0.07    0.21
   2  24  -3    0.13    0.25
  -3 -24   3    2.29    0.32
   3  24  -3    3.10    0.29
   3  24  -3    1.91    0.29
   3  24  -3    2.90    0.30
  -4 -24   3    1.68    0.32
   4  24  -3    1.52    0.31
   4  24  -3    0.78    0.28
   4  24  -3    1.43    0.25
  -5 -24   3    1.30    0.32
   5  24  -3    0.63    0.31
   5  24  -3    0.84    0.31
  -6 -24   3    0.96    0.31
   6  24  -3    0.62    0.36
   6  24  -3    0.45    0.31
   6 -23   3   -0.52    0.31
  -6  23  -3    0.05    0.27
  -6  23  -3    0.24    0.34
   5 -23   3    2.46    0.38
  -5  23  -3    1.56    0.32
  -5  23  -3    1.72    0.29
   4 -23   3    2.12    0.36
  -4  23  -3    2.39    0.34
  -4  23  -3    2.53    0.35
   3 -23   3    0.67    0.29
  -3  23  -3    0.53    0.27
  -3  23  -3    0.36    0.27
   2 -23   3   -0.04    0.23
  -2  23  -3    0.17    0.23
  -2  23  -3    0.34    0.19
  -2  23  -3    0.03    0.22
   1 -23   3    0.26    0.25
  -1  23  -3    0.58    0.21
  -1  23  -3    0.23    0.24
  -1  23  -3    0.18    0.20
   0 -23   3    0.48    0.25
   0  23  -3    0.11    0.23
   0  23  -3   -0.12    0.18
   0  23  -3    0.42    0.21
  -1 -23   3    1.58    0.28
   1  23  -3    2.00    0.28
   1  23  -3    1.91    0.26
  -2 -23   3   -0.05    0.24
   2  23  -3    0.00    0.20
   2  23  -3   -0.06    0.20
   2  23  -3   -0.18    0.23
  -3 -23   3    0.46    0.25
   3  23  -3    0.16    0.21
   3  23  -3    0.02    0.23
   3  23  -3    0.00    0.23
  -4 -23   3    5.13    0.41
   4  23  -3    5.56    0.42
   4  23  -3    5.11    0.40
   4  23  -3    4.89    0.36
  -5 -23   3    0.32    0.29
   5  23  -3    0.21    0.28
   5  23  -3    0.29    0.31
  -6 -23   3    1.06    0.30
   6  23  -3    0.63    0.35
   6  23  -3    0.48    0.34
  -7 -23   3   -0.43    0.32
   7  23  -3    0.54    0.37
   7  23  -3    0.51    0.36
   7 -22   3    2.79    0.44
  -7  22  -3    2.12    0.42
  -7  22  -3    1.99    0.35
   6 -22   3    0.52    0.33
  -6  22  -3    0.24    0.27
  -6  22  -3    1.13    0.35
   5 -22   3    4.10    0.43
  -5  22  -3    3.86    0.37
  -5  22  -3    4.31    0.41
   4 -22   3    2.82    0.36
  -4  22  -3    2.42    0.30
  -4  22  -3    2.60    0.34
   3 -22   3    0.42    0.26
  -3  22  -3    0.60    0.18
  -3  22  -3    0.71    0.27
  -3  22  -3    0.39    0.26
   2 -22   3    0.47    0.23
  -2  22  -3    1.05    0.24
  -2  22  -3    0.94    0.25
  -2  22  -3    0.43    0.19
   1 -22   3    3.28    0.30
  -1  22  -3    3.88    0.29
  -1  22  -3    4.77    0.35
  -1  22  -3    4.26    0.32
   0 -22   3    0.93    0.25
   0  22  -3    1.34    0.20
   0  22  -3    1.56    0.24
   0  22  -3    1.67    0.24
  -1 -22   3    6.93    0.43
   1  22  -3    7.18    0.41
   1  22  -3    9.04    0.42
   1  22  -3    7.77    0.35
  -2 -22   3    1.91    0.26
   2  22  -3    2.92    0.26
   2  22  -3    2.33    0.26
   2  22  -3    2.30    0.27
  -3 -22   3    5.94    0.44
   3  22  -3    6.29    0.44
   3  22  -3    5.63    0.36
   3  22  -3    5.97    0.42
  -4 -22   3    0.18    0.26
   4  22  -3    0.10    0.28
   4  22  -3    0.39    0.27
   4  22  -3    0.88    0.22
  -5 -22   3    1.73    0.34
   5  22  -3    2.09    0.35
   5  22  -3    2.29    0.35
  -6 -22   3   -0.06    0.28
   6  22  -3    0.07    0.32
   6  22  -3    0.12    0.32
  -7 -22   3    0.24    0.32
   7  22  -3    0.04    0.33
   7  22  -3    0.03    0.37
   7 -21   3    0.58    0.38
  -7  21  -3    0.54    0.29
  -7  21  -3    1.05    0.33
   6 -21   3    3.04    0.40
  -6  21  -3    2.78    0.34
  -6  21  -3    4.42    0.44
   5 -21   3   10.78    0.60
  -5  21  -3    9.70    0.52
  -5  21  -3   10.83    0.58
   4 -21   3    5.39    0.41
  -4  21  -3    6.05    0.44
  -4  21  -3    6.60    0.47
   3 -21   3    1.16    0.29
  -3  21  -3    0.55    0.17
  -3  21  -3    0.64    0.25
  -3  21  -3    0.86    0.26
   2 -21   3    0.53    0.25
  -2  21  -3    1.04    0.20
  -2  21  -3    0.85    0.24
  -2  21  -3    0.74    0.23
   1 -21   3    2.01    0.28
  -1  21  -3    1.88    0.26
  -1  21  -3    2.06    0.23
  -1  21  -3    1.60    0.23
   0 -21   3   -0.29    0.21
   0  21  -3    0.01    0.20
   0  21  -3    0.24    0.16
   0  21  -3   -0.23    0.18
  -1 -21   3    2.59    0.29
   1  21  -3    2.28    0.25
   1  21  -3    2.51    0.22
   1  21  -3    2.54    0.27
   1  21  -3    2.51    0.20
  -2 -21   3    0.11    0.22
   2  21  -3   -0.03    0.19
   2  21  -3    0.06    0.18
   2  21  -3   -0.14    0.19
  -3 -21   3   -0.16    0.23
   3  21  -3    0.22    0.19
   3  21  -3   -0.14    0.24
   3  21  -3   -0.05    0.21
  -4 -21   3    0.79    0.28
   4  21  -3    0.61    0.27
   4  21  -3    0.49    0.26
   4  21  -3    0.90    0.21
  -5 -21   3    0.99    0.30
   5  21  -3    0.84    0.31
   5  21  -3    1.24    0.32
  -6 -21   3    0.40    0.31
   6  21  -3   -0.09    0.32
   6  21  -3    0.58    0.29
  -7 -21   3    1.16    0.35
   7  21  -3    0.40    0.35
   7  21  -3    1.59    0.39
   7 -20   3    6.65    0.53
  -7  20  -3    6.14    0.44
  -7  20  -3    6.21    0.51
   6 -20   3    8.92    0.54
  -6  20  -3    9.30    0.59
  -6  20  -3    8.87    0.50
   5 -20   3    0.28    0.31
  -5  20  -3    0.24    0.25
  -5  20  -3    0.28    0.30
   4 -20   3    7.52    0.49
  -4  20  -3    6.62    0.48
  -4  20  -3    7.03    0.44
   3 -20   3    2.35    0.31
  -3  20  -3    2.71    0.22
  -3  20  -3    2.49    0.29
  -3  20  -3    2.87    0.32
   2 -20   3    7.56    0.44
  -2  20  -3    7.21    0.40
  -2  20  -3    8.03    0.39
  -2  20  -3    7.72    0.35
   1 -20   3    8.00    0.42
  -1  20  -3    8.50    0.39
  -1  20  -3    8.62    0.37
  -1  20  -3    8.37    0.38
   0 -20   3    8.78    0.44
   0  20  -3   10.13    0.41
   0  20  -3   10.77    0.38
   0  20  -3   10.39    0.33
   0  20  -3   10.44    0.44
  -1 -20   3    6.20    0.39
   1  20  -3    6.38    0.36
   1  20  -3    7.06    0.29
   1  20  -3    6.62    0.32
   1  20  -3    6.78    0.37
  -2 -20   3    2.70    0.29
   2  20  -3    2.16    0.24
   2  20  -3    2.34    0.25
   2  20  -3    2.12    0.23
  -3 -20   3    5.66    0.37
   3  20  -3    5.15    0.39
   3  20  -3    5.58    0.33
   3  20  -3    5.54    0.41
  -4 -20   3    1.12    0.27
   4  20  -3    0.41    0.25
   4  20  -3    0.52    0.26
   4  20  -3    0.51    0.20
  -5 -20   3    2.22    0.32
   5  20  -3    2.32    0.32
   5  20  -3    1.83    0.32
   5  20  -3    2.47    0.28
  -6 -20   3   -0.06    0.28
   6  20  -3   -0.11    0.27
   6  20  -3    0.66    0.33
  -7 -20   3    2.06    0.37
   7  20  -3    2.28    0.37
   7  20  -3    2.79    0.42
   8 -19   3    0.40    0.38
  -8  19  -3    0.83    0.31
  -8  19  -3    0.79    0.38
   7 -19   3    0.55    0.34
  -7  19  -3    0.12    0.32
  -7  19  -3    0.58    0.28
   6 -19   3    6.77    0.54
  -6  19  -3    6.50    0.46
  -6  19  -3    7.54    0.54
   5 -19   3    1.54    0.32
  -5  19  -3    1.42    0.32
  -5  19  -3    1.70    0.29
   4 -19   3   34.60    0.95
  -4  19  -3   36.03    0.95
  -4  19  -3   35.57    0.92
   3 -19   3    6.51    0.44
  -3  19  -3    6.64    0.29
  -3  19  -3    6.65    0.41
  -3  19  -3    5.79    0.39
   2 -19   3   11.21    0.48
  -2  19  -3   11.19    0.39
  -2  19  -3   11.10    0.45
  -2  19  -3   11.62    0.47
   1 -19   3    7.65    0.37
  -1  19  -3    8.94    0.36
  -1  19  -3    8.48    0.38
  -1  19  -3    7.96    0.36
   0 -19   3    3.87    0.29
   0  19  -3    4.23    0.27
   0  19  -3    4.64    0.23
   0  19  -3    4.17    0.31
   0  19  -3    4.55    0.33
  -1 -19   3    1.17    0.16
  -1 -19   3    0.93    0.22
   1  19  -3    0.99    0.15
   1  19  -3    0.83    0.16
   1  19  -3    0.98    0.21
   1  19  -3    0.81    0.21
  -2 -19   3    8.00    0.40
  -2 -19   3    7.54    0.35
   2  19  -3    8.17    0.37
   2  19  -3    7.43    0.37
   2  19  -3    7.83    0.37
  -3 -19   3    1.96    0.24
  -3 -19   3    2.37    0.28
   3  19  -3    1.43    0.24
   3  19  -3    1.91    0.22
   3  19  -3    2.18    0.25
  -4 -19   3    1.06    0.27
   4  19  -3    1.14    0.20
   4  19  -3    1.02    0.27
   4  19  -3    1.08    0.26
  -5 -19   3    4.18    0.37
   5  19  -3    4.96    0.32
   5  19  -3    4.43    0.38
   5  19  -3    5.17    0.40
  -6 -19   3    0.48    0.29
   6  19  -3    0.44    0.31
   6  19  -3    0.13    0.29
  -7 -19   3    0.06    0.30
   7  19  -3   -0.56    0.29
   7  19  -3   -0.29    0.33
  -8 -19   3    4.56    0.46
   8  19  -3    5.12    0.49
   8  19  -3    4.31    0.44
   8 -18   3    0.31    0.36
  -8  18  -3   -0.50    0.32
  -8  18  -3    0.02    0.27
   7 -18   3    5.44    0.45
  -7  18  -3    5.44    0.40
  -7  18  -3    5.38    0.45
   6 -18   3    4.69    0.42
  -6  18  -3    3.65    0.33
  -6  18  -3    4.43    0.39
   5 -18   3   14.99    0.62
  -5  18  -3   15.38    0.63
  -5  18  -3   14.30    0.56
   4 -18   3    0.83    0.28
  -4  18  -3    0.94    0.22
  -4  18  -3    1.04    0.26
   3 -18   3    2.88    0.30
  -3  18  -3    2.52    0.25
  -3  18  -3    3.47    0.24
  -3  18  -3    3.19    0.30
   2 -18   3   15.83    0.55
  -2  18  -3   15.47    0.53
  -2  18  -3   16.45    0.52
  -2  18  -3   16.11    0.46
   1 -18   3    0.40    0.20
  -1  18  -3    0.74    0.18
  -1  18  -3    0.47    0.20
  -1  18  -3    0.68    0.10
  -1  18  -3    0.40    0.17
   0 -18   3    0.07    0.16
   0  18  -3    0.43    0.12
   0  18  -3    0.42    0.18
   0  18  -3    0.31    0.17
   0  18  -3    0.25    0.14
  -1 -18   3    0.71    0.20
  -1 -18   3    0.82    0.15
   1  18  -3    0.96    0.14
   1  18  -3    1.06    0.20
   1  18  -3    0.85    0.16
   1  18  -3    0.90    0.20
  -2 -18   3    6.30    0.31
  -2 -18   3    6.24    0.36
   2  18  -3    6.90    0.23
   2  18  -3    7.06    0.33
   2  18  -3    6.36    0.34
   2  18  -3    6.43    0.37
  -3 -18   3    2.29    0.25
  -3 -18   3    2.08    0.27
   3  18  -3    2.34    0.22
   3  18  -3    2.52    0.26
   3  18  -3    1.97    0.24
  -4 -18   3    0.28    0.23
  -4 -18   3   -0.21    0.19
   4  18  -3   -0.01    0.24
   4  18  -3    0.12    0.17
   4  18  -3   -0.10    0.22
  -5 -18   3    0.60    0.25
   5  18  -3    0.41    0.17
   5  18  -3    0.72    0.28
   5  18  -3    0.48    0.26
  -6 -18   3   15.07    0.64
   6  18  -3   16.41    0.68
   6  18  -3   17.92    0.66
  -7 -18   3    0.39    0.32
   7  18  -3    0.88    0.32
   7  18  -3    0.90    0.35
  -8 -18   3    0.59    0.34
   8  18  -3    0.75    0.38
   8  18  -3   -0.05    0.31
   8 -17   3    0.57    0.35
  -8  17  -3    0.15    0.34
  -8  17  -3    0.00    0.26
   7 -17   3   -0.27    0.29
  -7  17  -3    0.02    0.25
  -7  17  -3    0.53    0.32
   6 -17   3    0.02    0.27
  -6  17  -3    0.09    0.22
  -6  17  -3    0.23    0.29
   5 -17   3    0.43    0.27
  -5  17  -3    0.59    0.23
  -5  17  -3    0.34    0.29
   4 -17   3   33.89    0.88
  -4  17  -3   33.48    0.89
  -4  17  -3   32.71    0.84
   3 -17   3   -0.04    0.22
  -3  17  -3    0.01    0.19
  -3  17  -3    0.06    0.12
  -3  17  -3   -0.06    0.21
   2 -17   3    0.03    0.18
  -2  17  -3   -0.01    0.14
  -2  17  -3    0.10    0.18
  -2  17  -3    0.21    0.17
   1 -17   3    6.89    0.36
  -1  17  -3    7.52    0.32
  -1  17  -3    6.68    0.33
  -1  17  -3    7.11    0.22
  -1  17  -3    7.06    0.36
   0 -17   3   10.73    0.31
   0 -17   3    9.76    0.39
   0  17  -3   10.10    0.37
   0  17  -3   10.64    0.31
   0  17  -3    9.66    0.35
   0  17  -3   10.49    0.40
  -1 -17   3    2.78    0.23
  -1 -17   3    2.33    0.22
   1  17  -3    2.95    0.20
   1  17  -3    3.37    0.26
   1  17  -3    2.89    0.21
   1  17  -3    2.69    0.23
  -2 -17   3    4.35    0.29
  -2 -17   3    4.27    0.31
   2  17  -3    4.19    0.28
   2  17  -3    4.25    0.18
   2  17  -3    4.26    0.30
   2  17  -3    4.43    0.30
  -3 -17   3    3.17    0.29
  -3 -17   3    3.11    0.26
   3  17  -3    2.88    0.27
   3  17  -3    2.47    0.21
   3  17  -3    2.76    0.25
  -4 -17   3    6.04    0.39
  -4 -17   3    5.12    0.38
   4  17  -3    5.07    0.30
   4  17  -3    4.57    0.37
   4  17  -3    5.43    0.36
  -5 -17   3    0.73    0.26
   5  17  -3    1.08    0.28
   5  17  -3    0.91    0.18
   5  17  -3    1.12    0.27
  -6 -17   3   10.88    0.56
   6  17  -3   11.46    0.55
   6  17  -3   10.79    0.59
  -7 -17   3    6.81    0.53
   7  17  -3    7.78    0.52
   7  17  -3    7.52    0.58
  -8 -17   3    1.60    0.36
   8  17  -3    1.05    0.39
   8  17  -3    0.78    0.33
   8 -16   3   -0.03    0.32
  -8  16  -3    0.39    0.35
  -8  16  -3   -0.27    0.29
   7 -16   3    1.41    0.35
  -7  16  -3    0.81    0.26
  -7  16  -3    0.78    0.32
   6 -16   3    1.63    0.32
  -6  16  -3    1.21    0.32
  -6  16  -3    1.02    0.25
   5 -16   3   15.95    0.60
  -5  16  -3   15.29    0.61
  -5  16  -3   15.27    0.54
   4 -16   3   17.04    0.59
  -4  16  -3   17.06    0.53
  -4  16  -3   15.55    0.52
  -4  16  -3   16.83    0.59
   3 -16   3    5.40    0.34
  -3  16  -3    5.31    0.24
  -3  16  -3    4.57    0.32
  -3  16  -3    5.18    0.33
   2 -16   3   10.09    0.40
  -2  16  -3   10.79    0.39
  -2  16  -3   10.86    0.40
  -2  16  -3   10.81    0.34
   1 -16   3    3.14    0.25
  -1  16  -3    3.53    0.16
  -1  16  -3    3.91    0.29
  -1  16  -3    3.29    0.23
  -1  16  -3    3.59    0.24
   0 -16   3    0.64    0.17
   0 -16   3    0.75    0.12
   0  16  -3    0.88    0.15
   0  16  -3    0.91    0.17
   0  16  -3    0.69    0.17
   0  16  -3    0.71    0.12
  -1 -16   3    3.56    0.26
  -1 -16   3    3.49    0.23
   1  16  -3    3.29    0.24
   1  16  -3    3.68    0.20
   1  16  -3    3.97    0.24
   1  16  -3    3.91    0.29
  -2 -16   3   16.78    0.49
  -2 -16   3   16.56    0.52
   2  16  -3   16.96    0.48
   2  16  -3   17.80    0.39
   2  16  -3   17.59    0.49
   2  16  -3   16.65    0.51
  -3 -16   3    0.84    0.21
  -3 -16   3    1.10    0.21
   3  16  -3    0.67    0.16
   3  16  -3    0.69    0.19
   3  16  -3    0.69    0.20
  -4 -16   3   13.18    0.49
  -4 -16   3   11.65    0.48
   4  16  -3   12.55    0.49
   4  16  -3   12.01    0.40
   4  16  -3   11.66    0.49
  -5 -16   3   10.07    0.50
  -5 -16   3    8.67    0.43
   5  16  -3    9.76    0.48
   5  16  -3    8.84    0.35
   5  16  -3    9.23    0.49
  -6 -16   3    0.75    0.27
   6  16  -3    0.13    0.27
   6  16  -3    0.91    0.30
  -7 -16   3    0.26    0.26
   7  16  -3    0.01    0.25
   7  16  -3    0.23    0.30
  -8 -16   3    0.29    0.32
   8  16  -3   -0.21    0.30
   8  16  -3   -0.20    0.35
   8 -15   3    0.37    0.30
  -8  15  -3   -0.06    0.31
   7 -15   3    0.36    0.30
  -7  15  -3    0.39    0.25
  -7  15  -3    0.22    0.30
   6 -15   3    0.27    0.27
  -6  15  -3    0.10    0.20
  -6  15  -3    0.14    0.24
   5 -15   3    2.33    0.29
  -5  15  -3    2.11    0.24
  -5  15  -3    2.48    0.31
   4 -15   3    3.19    0.30
  -4  15  -3    2.52    0.26
  -4  15  -3    2.55    0.19
  -4  15  -3    2.82    0.25
   3 -15   3    2.30    0.24
  -3  15  -3    2.05    0.23
  -3  15  -3    2.50    0.17
  -3  15  -3    2.41    0.25
   2 -15   3   12.99    0.46
  -2  15  -3   12.75    0.42
  -2  15  -3   12.41    0.43
  -2  15  -3   12.99    0.37
   1 -15   3   12.23    0.29
   1 -15   3   11.92    0.41
  -1  15  -3   12.48    0.29
  -1  15  -3   11.70    0.39
  -1  15  -3   11.87    0.41
  -1  15  -3   11.90    0.37
   0 -15   3    1.26    0.18
   0 -15   3    1.34    0.13
   0  15  -3    1.37    0.18
   0  15  -3    1.21    0.15
   0  15  -3    1.06    0.13
   0  15  -3    1.52    0.19
  -1 -15   3    1.13    0.19
  -1 -15   3    1.24    0.15
   1  15  -3    1.01    0.19
   1  15  -3    1.04    0.13
   1  15  -3    1.09    0.15
   1  15  -3    1.23    0.18
  -2 -15   3    0.93    0.17
  -2 -15   3    1.42    0.18
   2  15  -3    1.25    0.18
   2  15  -3    1.36    0.10
   2  15  -3    1.43    0.18
   2  15  -3    1.21    0.20
  -3 -15   3   20.82    0.61
  -3 -15   3   21.43    0.59
   3  15  -3   21.65    0.60
   3  15  -3   21.07    0.61
   3  15  -3   21.41    0.54
  -4 -15   3    2.57    0.26
  -4 -15   3    1.91    0.24
   4  15  -3    2.32    0.20
   4  15  -3    2.84    0.28
   4  15  -3    2.49    0.27
  -5 -15   3    3.39    0.33
  -5 -15   3    3.51    0.32
   5  15  -3    3.08    0.29
   5  15  -3    3.14    0.33
   5  15  -3    3.17    0.22
  -6 -15   3    2.53    0.33
   6  15  -3    2.87    0.35
   6  15  -3    2.81    0.33
  -7 -15   3    0.43    0.30
   7  15  -3    0.18    0.28
   7  15  -3    0.98    0.33
  -8 -15   3    0.88    0.35
   8  15  -3    0.81    0.37
   8  15  -3    0.79    0.29
  -9 -15   3   -0.32    0.34
   9  15  -3    0.21    0.35
   9  15  -3    0.07    0.31
   9 -14   3    0.77    0.38
  -9  14  -3    0.92    0.36
   8 -14   3    0.21    0.34
  -8  14  -3    0.14    0.30
   7 -14   3    2.33    0.37
  -7  14  -3    2.19    0.28
  -7  14  -3    2.36    0.36
   6 -14   3   18.38    0.64
  -6  14  -3   18.71    0.67
  -6  14  -3   18.68    0.59
   5 -14   3   -0.09    0.23
  -5  14  -3    0.14    0.19
  -5  14  -3    0.54    0.24
   4 -14   3    3.58    0.29
  -4  14  -3    4.27    0.32
  -4  14  -3    4.09    0.31
  -4  14  -3    4.04    0.19
   3 -14   3   17.30    0.52
  -3  14  -3   16.93    0.53
  -3  14  -3   16.76    0.42
  -3  14  -3   16.69    0.51
   2 -14   3   24.46    0.63
  -2  14  -3   23.31    0.61
  -2  14  -3   24.75    0.62
  -2  14  -3   24.94    0.57
   1 -14   3   23.02    0.49
   1 -14   3   23.91    0.62
  -1  14  -3   22.99    0.58
  -1  14  -3   23.79    0.59
  -1  14  -3   23.13    0.49
  -1  14  -3   24.29    0.56
   0 -14   3    3.67    0.19
   0 -14   3    3.30    0.24
   0  14  -3    3.30    0.19
   0  14  -3    3.59    0.27
   0  14  -3    3.71    0.25
   0  14  -3    2.73    0.21
  -1 -14   3    0.04    0.16
  -1 -14   3    0.08    0.12
   1  14  -3   -0.11    0.14
   1  14  -3    0.13    0.10
   1  14  -3   -0.01    0.12
   1  14  -3    0.08    0.13
  -2 -14   3   11.76    0.38
  -2 -14   3   10.80    0.38
   2  14  -3   11.41    0.41
   2  14  -3   11.46    0.36
   2  14  -3   10.99    0.39
   2  14  -3   11.54    0.27
  -3 -14   3   18.82    0.55
  -3 -14   3   19.18    0.56
   3  14  -3   18.45    0.56
   3  14  -3   19.19    0.49
   3  14  -3   18.62    0.54
  -4 -14   3   -0.09    0.17
  -4 -14   3   -0.03    0.19
   4  14  -3    0.01    0.20
   4  14  -3   -0.26    0.20
   4  14  -3    0.11    0.13
  -5 -14   3    1.56    0.26
  -5 -14   3    1.53    0.25
   5  14  -3    2.20    0.28
   5  14  -3    1.41    0.17
   5  14  -3    1.86    0.29
  -6 -14   3    8.47    0.48
   6  14  -3    8.66    0.48
   6  14  -3    8.08    0.46
  -7 -14   3    0.55    0.29
   7  14  -3    0.23    0.27
[truncated: 2,995,529 more chars]
